# Supplementary material for: Alkali ion-controlled chemoselective indolation of allylic alcohols by base catalysis
Source: Royal Society of Chemistry journal article supplement (doi:10.1039/d4qo00777h), 2024-01-01
Supplement: d4qo00777h1.pdf [file d4qo00777h1.pdf]

## Supporting Information

# Alkali Ion Tuned Chemoselective Indolation of Allylic Alcohols by Base Catalysis

Ning Wang,<sup>ξ,a,b</sup> Ruzhao Chen,<sup>ξ,a</sup> Zhe Chen,<sup>b</sup> Weikang Li,<sup>b</sup> Xiuling Wen,<sup>c</sup> Cunyuan Zhao,<sup>a</sup> and Zhuofeng Ke<sup>\*,a,b</sup>

<sup>a</sup>School of Chemistry, PCFM Lab, Sun Yat-sen University, Guangzhou 510275, China

<sup>b</sup>School of Materials Science and Engineering, the Key Laboratory of Low-carbon Chemistry & Energy Conservation of Guangdong Province, Sun Yat-sen University, Guangzhou 510275, China

<sup>c</sup>Health College of Traditional Chinese Medicine, Guangzhou Nanfang University, Guangzhou 510970, China.

\*Corresponding Author: kezhf3@mail.sysu.edu.cn

## Contents

|                                                                            |     |
|----------------------------------------------------------------------------|-----|
| 1. General information .....                                               | 1   |
| 2. General analytical information.....                                     | 2   |
| 3. General experiment .....                                                | 2   |
| 3.1 Reaction optimization .....                                            | 2   |
| 3.2 General method for the substrate screenings .....                      | 3   |
| 4. The synthesis of allylic alcohols.....                                  | 3   |
| 4.1 Route 1 of primary allylic alcohols .....                              | 3   |
| 4.2 Route 2 of primary allylic alcohols .....                              | 4   |
| 4.3 The synthesis of 1o.....                                               | 5   |
| 4.4 The synthesis of 1b-D .....                                            | 5   |
| 4.5 The synthesis of N-N-B .....                                           | 5   |
| 5. Mechanism investigation .....                                           | 6   |
| 5.1 Deuterium hydrogen labeling experiment for 3t-D.....                   | 6   |
| 5.2 Deuterium hydrogen labeling experiment for 5q-D.....                   | 6   |
| 5.3 The kinetic isotope effect of parallel reactions for 1,2-addition..... | 8   |
| 5.4 The kinetic isotope effect of parallel reactions for 1,4-addition..... | 9   |
| 6. Density functional theory studies .....                                 | 9   |
| 6.1 Density functional theory studies for 1,2-addition .....               | 9   |
| 6.2 Density functional theory studies for 1,4-addition .....               | 10  |
| 7. Characterization data of all products .....                             | 11  |
| 8. References.....                                                         | 25  |
| 9. <sup>1</sup> H and <sup>13</sup> C NMR spectra of all products .....    | 27  |
| 10. Crystallographic details of 5n .....                                   | 112 |
| 11. Cartesian coordinates .....                                            | 112 |

## 1. General information

General Information: Commercial reagents were purchased and used without further purification.

All glassware was dried and reactions were performed under a nitrogen atmosphere, unless otherwise stated. Flash column chromatography was performed using silica gel from Qindao Haiyang. Anhydrous solvents tetrahydrofuran (THF), Ethanol, *N,N*-dimethylformamide (DMF), ethyl acetate (EtOAc), acetonitrile (CH<sub>3</sub>CN), Toluene and water were purchased and used as received. <sup>1</sup>H and <sup>13</sup>C NMR data was acquired on a Bruker 400 MHz spectrometer and referenced to residual protic solvent. High-resolution mass spectrometry was performed at the University of Sun Yat-sen at the test center.

## 2. General analytical information

All new compounds were characterized by NMR spectroscopy, and high-resolution mass spectroscopy. NMR spectra were recorded on a Bruker Ascend TM 400 spectrometer and were calibrated using TMS or residual deuterated solvent as an internal reference (CDCl<sub>3</sub>: 7.26 ppm for <sup>1</sup>H NMR and 77.16 ppm for <sup>13</sup>C NMR; DMSO: 2.5 ppm for <sup>1</sup>H NMR and 39.6 ppm for <sup>13</sup>C NMR ).

## 3. General experiment

### 3.1 Reaction optimization

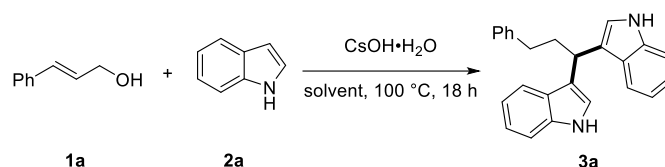

| Entry    | Solvent          | T/°C       | t/h       | <sup>a</sup> Y%/ <sup>c</sup> 3a |
|----------|------------------|------------|-----------|----------------------------------|
| 1        | THF              | 100        | 18        | 85                               |
| 2        | DMF              | 100        | 18        | n.r.                             |
| 3        | EtOH             | 100        | 18        | trace                            |
| 4        | H <sub>2</sub> O | 100        | 18        | n.r.                             |
| 5        | MeCN             | 100        | 18        | n.d.                             |
| <b>6</b> | <b>Toluene</b>   | <b>100</b> | <b>18</b> | <b>88</b>                        |

**Table S1** The investigation of solvent for **3a**: <sup>a</sup>Reaction conditions: **1a** (0.3 mmol), **2a** (0.75 mmol), CsOH•H<sub>2</sub>O (0.3 mmol), toluene (1 mL), 100 °C, 24 h, N<sub>2</sub>; <sup>b</sup>Isolated yield; <sup>c</sup>Yield determined by <sup>1</sup>H NMR spectroscopy, using 1,3,5-trimethoxybenzene as the internal standard.

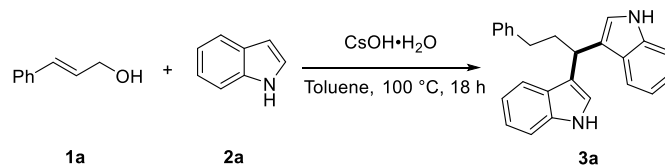

| Entry | 1a/2a | T/°C | Base(x eq.) | t/h | Y%/ <b>3a</b> |
|-------|-------|------|-------------|-----|---------------|
| 1     | 1/2   | 100  | 1           | 18  | 74            |
| 2     | 1/2.5 | 100  | 1           | 18  | 88            |
| 3     | 1/2.5 | 80   | 1           | 18  | 23            |
| 4     | 1/2.5 | 100  | 0.5         | 18  | 66            |

|          |              |            |            |           |                           |
|----------|--------------|------------|------------|-----------|---------------------------|
| 5        | 1/2.5        | 100        | 0.5        | 24        | 71                        |
| 6        | 1/2.5        | 120        | 0.5        | 18        | 96                        |
| <b>7</b> | <b>1/2.5</b> | <b>120</b> | <b>0.5</b> | <b>24</b> | <b>87<sup>b</sup>/100</b> |

**Table S2** The parameters optimization for **3a**: <sup>a</sup>Reaction conditions: **1a** (0.3 mmol), **2a** (0.75 mmol), CsOH•H<sub>2</sub>O (0.3 mmol), toluene (1 mL), 100 °C, 24 h, N<sub>2</sub>; <sup>b</sup>Isolated yield; <sup>c</sup>Yield determined by <sup>1</sup>H NMR spectroscopy, using 1,3,5-trimethoxybenzene as the internal standard.

Reaction scheme: 1a + 2a  $\xrightarrow{\text{NaO}^t\text{Bu, toluene}}$  5a + 6a

| Entry    | 1a/2a        | 1 eq. base                     | T/°C       | t/h       | Y%/ 5a                   | Y%/6a    |
|----------|--------------|--------------------------------|------------|-----------|--------------------------|----------|
| 1        | 1/2.5        | NaO <sup>t</sup> Bu            | 120        | 18        | 99                       | -        |
| 2        | 1/1.5        | NaO <sup>t</sup> Bu            | 120        | 18        | 99                       | 7        |
| 3        | 1/1          | NaO <sup>t</sup> Bu            | 120        | 18        | 89                       | -        |
| <b>4</b> | <b>1/1.5</b> | <b>NaO<sup>t</sup>Bu (0.5)</b> | <b>120</b> | <b>24</b> | <b>67<sup>b</sup>/99</b> | <b>9</b> |
| 5        | 1/1.5        | NaO <sup>t</sup> Bu (0.5)      | 100        | 24        | 78                       | -        |

**Table S3** The optimization of reaction conditions of **5a**: <sup>a</sup>Reaction conditions: **1a** (0.3 mmol), **2a** (0.75 mmol), NaO<sup>t</sup>Bu (0.3 mmol), toluene (1 mL), 100 °C, 24 h, N<sub>2</sub>; <sup>b</sup>Isolated yield; <sup>c</sup>Yield determined by <sup>1</sup>H NMR spectroscopy, using 1,3,5-trimethoxybenzene as the internal standard.

### 3.2 General method for the substrate screenings

**Procedure for bis(indolyl)methane derivatives:** To a 15 mL reaction tube in a glovebox, was added allylic alcohol (0.3 mmol), indole (0.75 mmol) CsOH•H<sub>2</sub>O, and toluene (1 mL). Then the tube was closed and removed from the glovebox. The reaction mixture was stirred for 24 h at 120 °C. The reaction was completed, cooled to room temperature, and quenched with methanol. The solvent was evaporated to dryness and the corresponding bis(indolyl)methane derivative was purified by column chromatography with silica gel (ethyl acetate/ petroleum ether). The yields were calculated based on isolated products.

**Procedure for 1,4-addition reaction:** To a 15 mL reaction tube in a glovebox, was added allylic alcohol (0.3 mmol), indole (0.45 mmol) NaO<sup>t</sup>Bu, and toluene (1 mL). Then the tube was closed and removed from the glovebox. The reaction mixture was stirred for 24 h at 120 °C. The reaction was completed, cooled to room temperature, and quenched with methanol. The solvent was evaporated to dryness and the corresponding product was purified by column chromatography with silica gel (ethyl acetate/ petroleum ether). The yields were calculated based on isolated products.

## 4. The synthesis of allylic alcohols

### 4.1 Route 1 of primary allylic alcohols

**Route 1**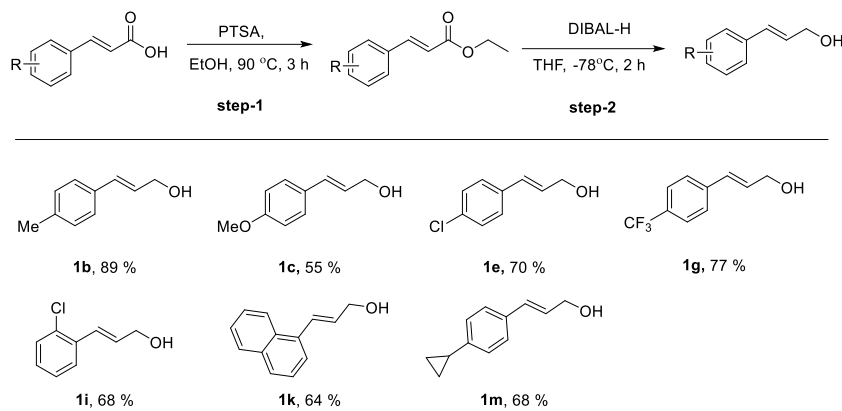

The mixture of cinnamic acid derivatives (1 equiv.) and 4-methylbenzenesulfonic acid (0.3 equiv.) in EtOH was stirred under 90 °C for 3 h. After completion of the reaction, ethanol was removed under reduced pressure. The residue was diluted with ethyl acetate and saturated sodium bicarbonate solution. The organic layer was washed with brine, dried with anhydrous  $\text{MgSO}_4$ , and concentrated under vacuum. Diisobutylaluminum hydride was slowly added to a stirred solution of ester in THF at -78 °C and was stirred for 1 h, then slowly warmed to room temperature, and stirred for another 1 h. After completion, the reaction was quenched by 0.5M hydrochloric acid solution and extracted with ethyl acetate. The organic layer was dried over anhydrous  $\text{Na}_2\text{SO}_4$ , concentrated, and purified by silica gel column chromatography using (ethyl acetate/ether 10:1) to afford corresponding cinnamyl alcohol. <sup>[1]</sup>

**4.2 Route 2 of primary allylic alcohols****Route 2**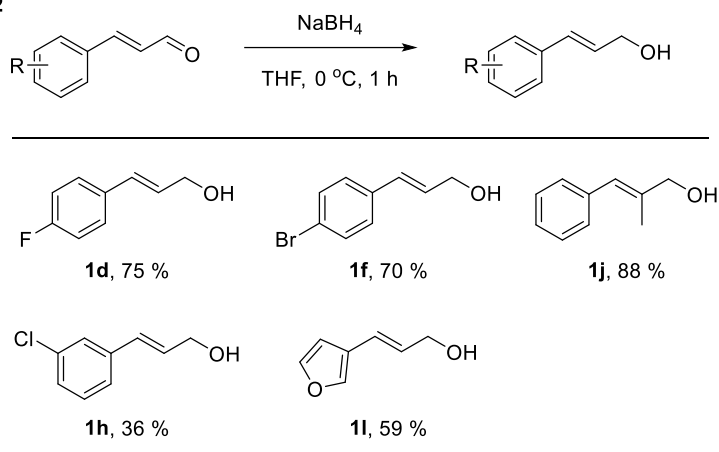

$\text{NaBH}_4$  was slowly poured into a solution of aldehyde in THF at 0 °C and was stirred for 1 h. After completion, the reaction was quenched with cold water and extracted with ethyl acetate. The organic layer was dried over anhydrous  $\text{Na}_2\text{SO}_4$ , concentrated, and purified by silica gel column chromatography using (ethyl acetate/ether 10:1) to afford corresponding cinnamyl alcohol. <sup>[2]</sup>

### 4.3 The synthesis of **1o**

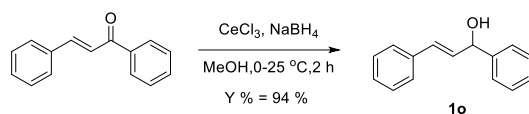

To a mixture of (*E*)-chalcone(500 mg, 2.4 mmol) and  $\text{CeCl}_3$ (2.4 mmol) was added prepared  $\text{NaBH}_4$ (2.4mmol) at 0 °C and stirred for 2 h. The reaction was quenched by the addition of 1 M HCl and extracted with  $\text{CH}_2\text{Cl}_2$ . The combined organic extracts were washed with brine, dried over anhydrous  $\text{MgSO}_4$ , filtered, concentrated, and purified on silica gel chromatography to give **1o**.<sup>[3]</sup>

### 4.4 The synthesis of **1b-D**

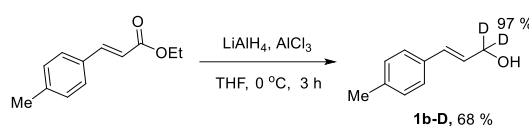

To a solution of cinnamic acid derivative(10 mmol) in dry THF (30 mL) was added dropwise to a well-stirred suspension of  $\text{LiAlH}_4$  (24 mmol) and  $\text{AlCl}_3$  (10 mmol) in THF (15 mL) at 0 °C. The reaction mixture was stirred at this temperature for 4 h, checked by TLC, the reaction was quenched by cold water. The solid residue was removed by filtration and washed with DCM-EtOH. The filtrate was dried over anhydrous  $\text{Na}_2\text{SO}_4$ , concentrated, and purified by silica gel column chromatography using (ethyl acetate/ether 10:1) to afford white solid(**1b-D**, 1.1 g, 68 %).<sup>[4]</sup> $^1\text{H}$  NMR (400 MHz, Chloroform- $d$ )  $\delta$  7.28 (t,  $J$  = 7.7 Hz, 2H), 7.13 (d,  $J$  = 7.9 Hz, 2H), 6.59 (d,  $J$  = 15.8 Hz, 1H), 6.32 (d,  $J$  = 15.9 Hz, 1H), 2.34 (s, 3H), 1.51 (s, 1H).  $^{13}\text{C}$  NMR (100 MHz, Chloroform- $d$ )  $\delta$  137.6, 133.9, 131.4, 129.3, 127.3, 126.4, 63.2, 21.2.

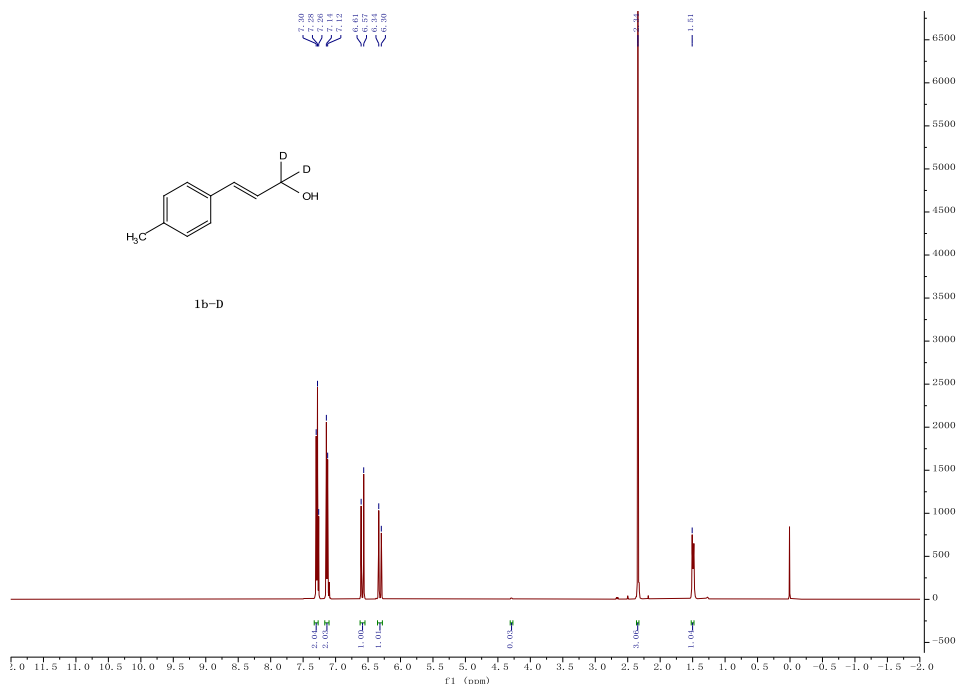

Figure S1  $^1\text{H}$  NMR of **1b-D**

### 4.5 The synthesis of N-N-B

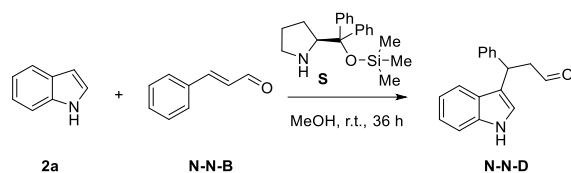

To a solution of **N-N-B** (1 eq.) and **S** (0.2 eq.) in MeOH was added indole (**2a**, 1.2eq.). The mixture was stirred at room temperature for 36 h. The reaction was quenched by water and extracted with  $\text{CH}_2\text{Cl}_2$ . The combined organic extracts were washed with brine, dried over anhydrous  $\text{MgSO}_4$ , filtered, concentrated, and purified on silica gel chromatography to afford **N-N-D**.<sup>[5]</sup>

## 5. Mechanism investigation

### 5.1 Deuterium hydrogen labeling experiment for 3t-D

The mixture of (*E*)-3-(*p*-tolyl)prop-2-en-1,1-d<sub>2</sub>-1-ol (**1b-D**, 0.3 mmol), indole (**2a**, 0.75 mmol) and  $\text{CsOH}\cdot\text{H}_2\text{O}$  (0.15 mmol) was stirred at 120°C for 48 h under  $\text{N}_2$ . The reaction was quenched by MeOH and concentrated and purified on silica gel chromatography (PE/EA=5/1) to afford **3,3'-(3-(*p*-tolyl)propane-1,1-diyl-1,3-d<sub>2</sub>)bis(1*H*-indole)** (**3t-D**) as a white solid (93.2 mg, 85 %). <sup>1</sup>H NMR (400 MHz, Chloroform-*d*)  $\delta$  7.79 (s, 2H), 7.62 (d, *J* = 7.9 Hz, 2H), 7.38 – 7.32 (m, 2H), 7.25 – 7.19 (m, 2H), 7.18 – 7.07 (m, 6H), 6.99 (d, *J* = 2.4 Hz, 2H), 4.56 (s, 0.06H), 2.74 (d, *J* = 8.4 Hz, 1.64H), 2.59 (dd, *J* = 8.7, 6.4 Hz, 2H), 2.40 (s, 3H). <sup>13</sup>C NMR (100 MHz, Chloroform-*d*)  $\delta$  139.6, 139.6, 136.7, 135.1, 129.0, 128.5, 127.1, 121.8, 121.6, 120.1, 119.7, 119.1, 111.2, 37.5, 37.4, 34.0, 21.1.

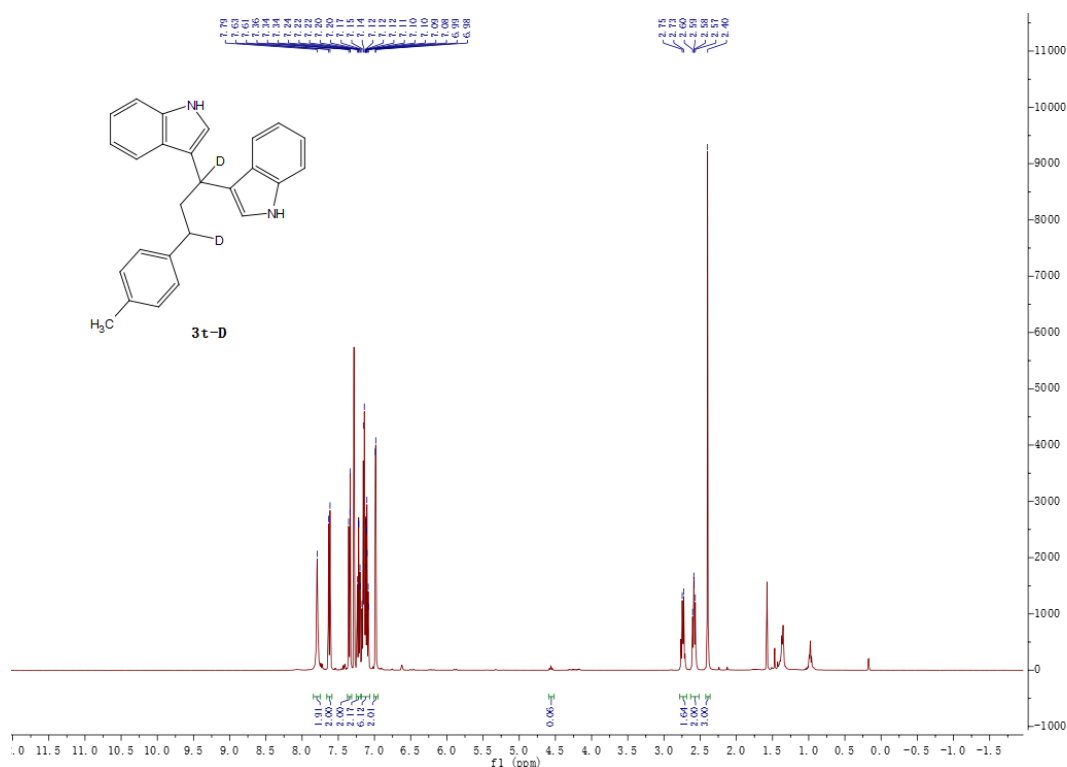

Figure S2 <sup>1</sup>H NMR of 3t-D

### 5.2 Deuterium hydrogen labeling experiment for 5q-D

The mixture of (*E*)-3-(*p*-tolyl)prop-2-en-1,1-d<sub>2</sub>-1-ol (**1b-D**, 0.3 mmol), indole (**2a**, 0.45 mmol) and

NaO<sup>t</sup>Bu(0.15 mmol) was stirred at 120 °C for 24 h under N<sub>2</sub>. The reaction was quenched by MeOH and concentrated and purified on silica gel chromatography (PE/EA=3/1) to afford 3-(1*H*-indol-3-yl)-3-(*p*-tolyl)propan-1,1-d<sub>2</sub>-1-ol(**5q-D**) as a white solid(54.0 mg, 68 %). <sup>1</sup>H NMR (400 MHz, Chloroform-*d*) δ 8.05 (s, 1H), 7.51 (d, *J* = 8, 1H), 7.37 – 7.32 (m, 1H), 7.25 (d, *J* = 8.0 Hz, 2H), 7.21-7.17 (m, 1H), 7.12 (d, *J* = 8 Hz, 2H), 7.09 – 7.02 (m, 2H), 4.39 (t, *J* = 7.7 Hz, 1H), 3.69 (q, *J* = 6.8 Hz, 0.03H), 2.47 (dd, *J* = 13.5, 7.0 Hz, 1H), 2.34 (s, 3H), 2.28 (dd, *J* = 13.6, 8.5 Hz, 1H), 1.50 (s, 1H). <sup>13</sup>C NMR (100 MHz, Chloroform-*d*) δ 141.8, 136.7, 135.7, 129.3, 127.8, 127.0, 122.1, 121.6, 112.0, 119.63, 119.4, 111.2, 60.8, 38.9, 38.7, 21.1. ESI-HRMS: *m/z* calculated for C<sub>18</sub>H<sub>18</sub>D<sub>2</sub>NO[M+H]<sup>+</sup>: 268.1665; found: 268.1665.

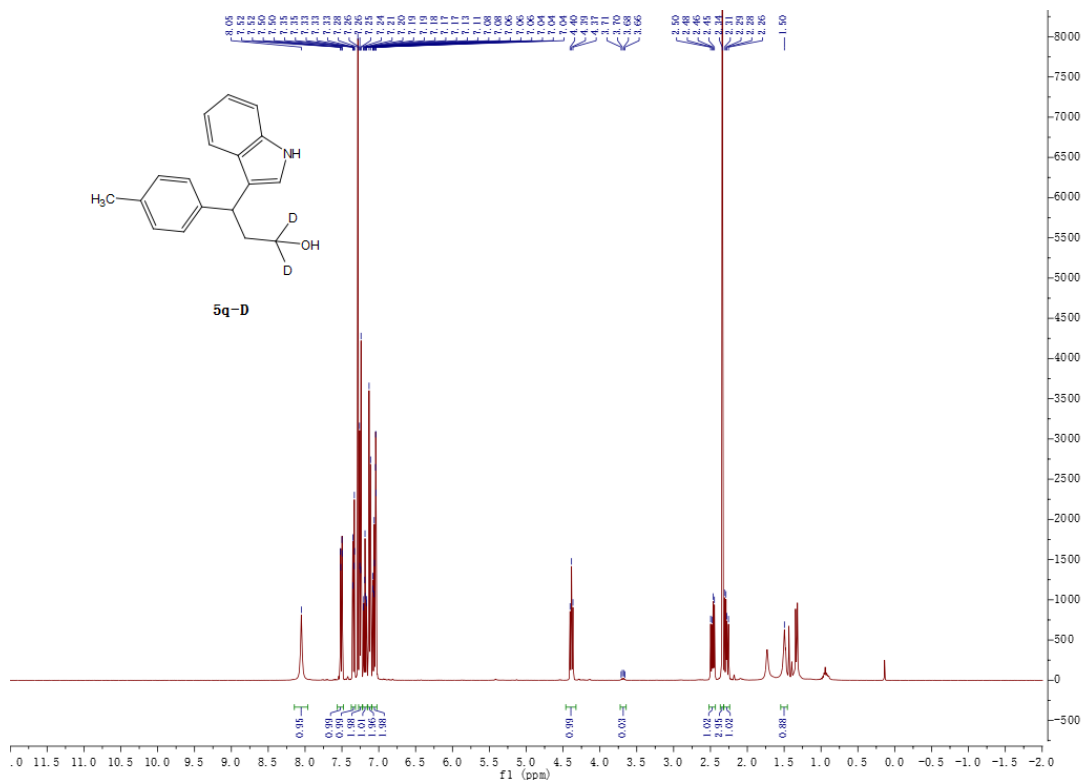

Figure S3 <sup>1</sup>H NMR of **5q-D**

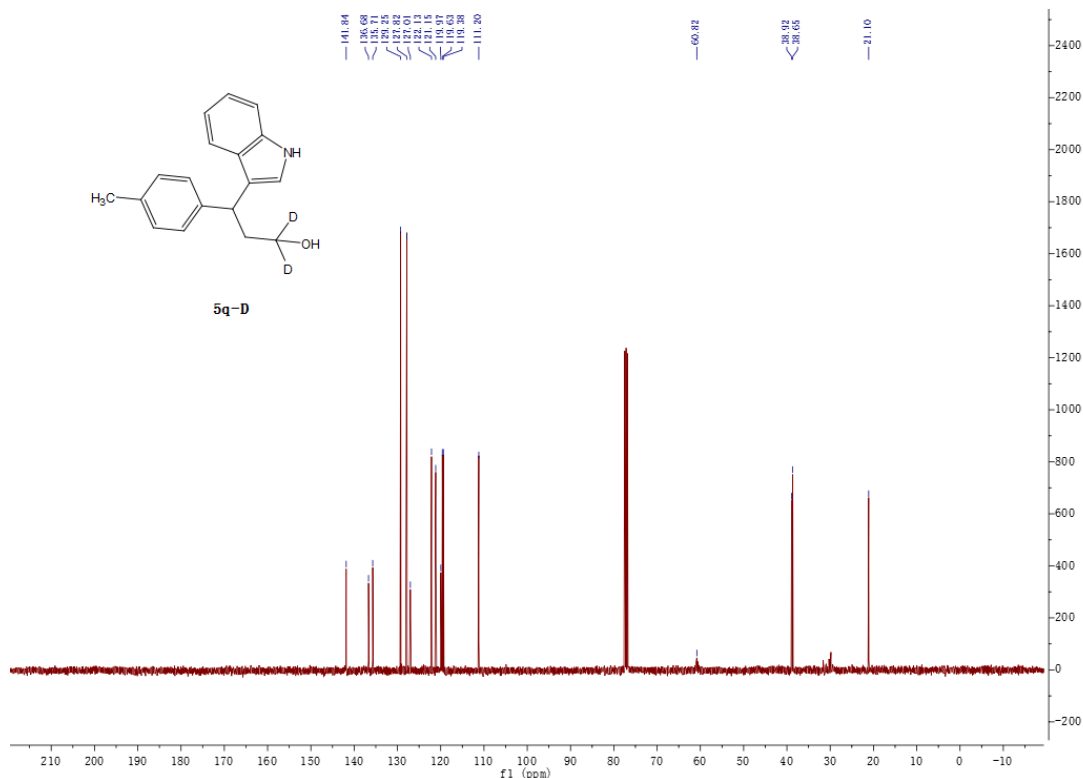

Figure S4  $^{13}\text{C}$  NMR of 5q-D

### 5.3 The kinetic isotope effect of parallel reactions for 1,2-addition.

Twelve parallel reactions, six with (*E*)-3-(*p*-tolyl)prop-2-en-1-ol (**1b**, 0.15 mmol) and other six with (*E*)-3-(*p*-tolyl)prop-2-en-1,1-d<sub>2</sub>-1-ol (**1b-D**, 0.15 mmol), were carried out under standard condition for 1,2-addition reaction. To a 15 mL reaction tube in a glovebox, was added indole (0.375 mmol), CsOH•H<sub>2</sub>O (0.075 mmol) and toluene (0.5 mL). Then the tube was sealed and removed from the glovebox. The reaction mixture was stirred at 120 °C, the reaction vessels were taken after 80, 90, 100, 110, 120, and 130 min. Yields of products were determined by  $^1\text{H}$  NMR spectroscopy, using 1,3,5-trimethoxybenzene as the internal standard. The calculated KIE ( $k_{\text{H}}/k_{\text{D}}$ ) was 2.5 (Figure S5), which suggested that the isomerization of the allylic alcohol is involved in the rate-determining step (RDS) of the reaction.

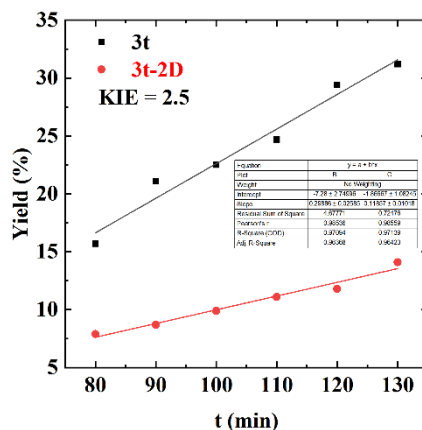

Figure S5 parallel reactions for 1,2-addition



## 5.4 The kinetic isotope effect of parallel reactions for 1,4-addition.

Twelve parallel reactions, six with (*E*)-3-(*p*-tolyl)prop-2-en-1-ol (**1b**, 0.15 mmol) and other six with (*E*)-3-(*p*-tolyl)prop-2-en-1,1-d<sub>2</sub>-1-ol (**1b-D**, 0.15 mmol), were carried out under standard condition for 1,4-addition reaction. To a 15 mL reaction tube in a glovebox, was added indole (0.225 mmol), NaO<sup>t</sup>Bu (0.075 mmol) and toluene (0.5 mL). Then the tube was sealed and removed from the glovebox. The reaction mixture was stirred at 120 °C, the reaction vessel was taken after 4, 5, 6, 8, and 9 min. Yields of products were determined by <sup>1</sup>H NMR spectroscopy, using 1,3,5-trimethoxybenzene as the internal standard. The calculated KIE ( $k_H/k_D$ ) was 2.5 (Figure S6), which suggested that hydrogen transfer of the allylic alcohol is involved in the rate-determining step (RDS) of the reaction.

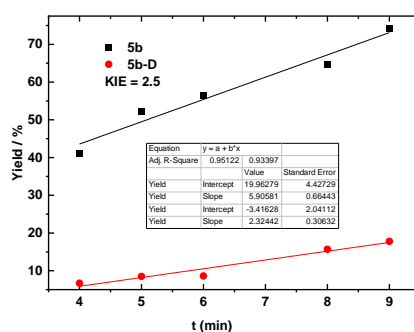

Figure S6 Parallel reactions for 1,4-addition

## 6. Density functional theory studies

All the calculations were performed by the Gaussian 09 program.<sup>6</sup> The 3D structures were displayed by the VMD program.<sup>7</sup>

All the structures were optimized by the density functional theory(B3LYP with D3 empirical dispersion correction) with basis set I (BSI, SDD for metal element and 6-31G\* for nonmetal element) in the gas phase. Frequency analysis calculation was applied to the optimized structures to make sure it's the minimum point (no imaginary frequency) or transition state (one imaginary frequency). IRC calculation was taken to confirm the transition state was connected to two minima. Based on the optimized structures, the energy results were refined by calculating the single point energy with B3LYP (D3 empirical dispersion correction) and basis set II (BSII, SDD for metal element and 6-311g\*\* nonmetal for nonmetal element) with the correction of solvent effect (SMD,solvent=toluene).

### 6.1 Density functional theory studies for 1,2-addition

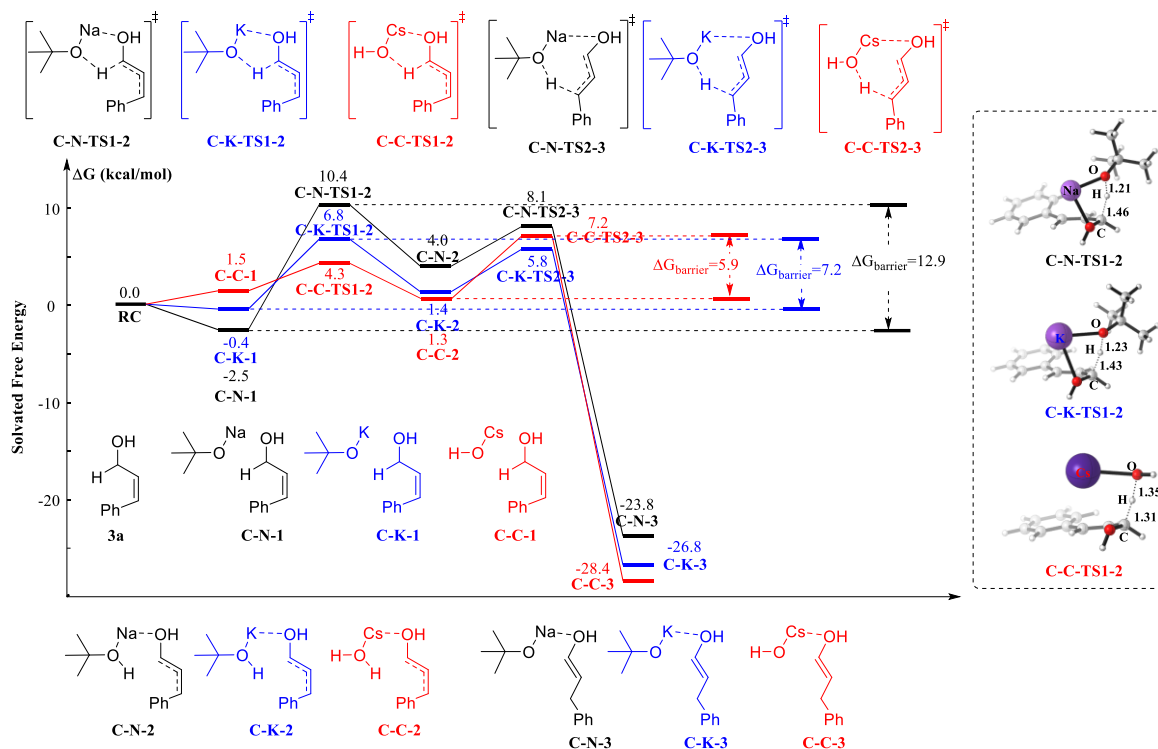

**Figure S7** Calculated Gibbs free energy profiles for 1,2-addition pathways at the B3LYP-D3/BSII/SMD(toluene)/B3LYP-D3/BSI. Value are given in kcal/mol.

## 6.2 Density functional theory studies for 1,4-addition

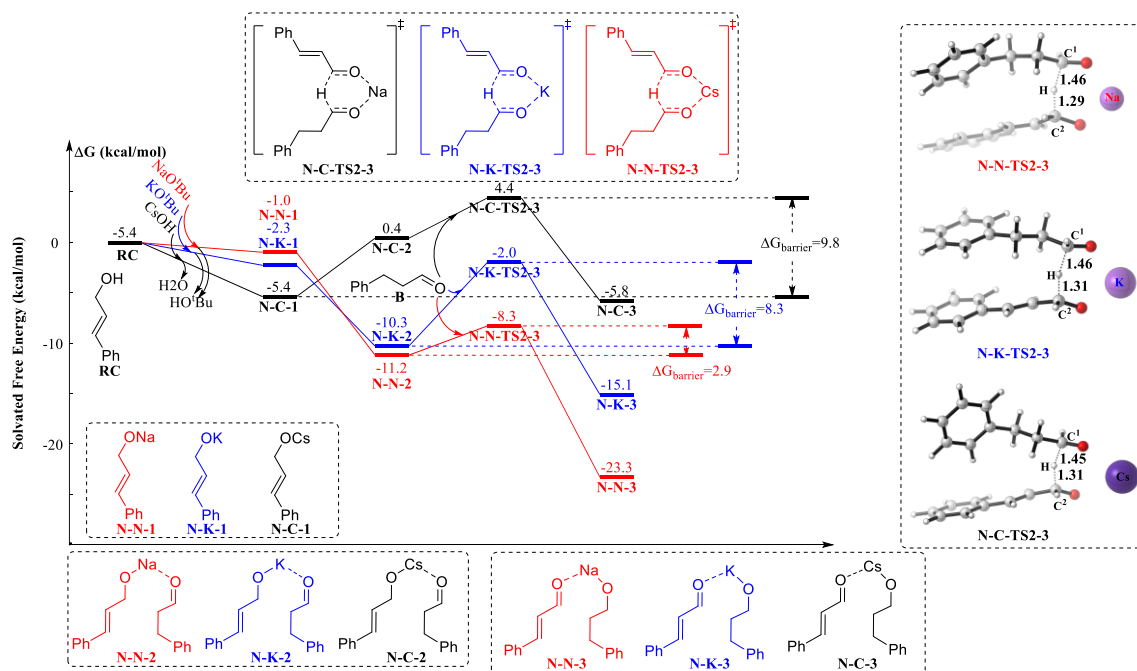

**Figure S8** Calculated Gibbs free energy profiles for 1,4-addition pathways at the B3LYP-D3/BSII/SMD(toluene)/B3LYP-D3/BSI for metal,. Value are given in kcal/mol.

## 7. Characterization data of all products

**3,3'-(3-phenylpropane-1,1-diyl)bis(1H-indole)(3a)**<sup>[8]</sup>: Purified by silica-gel column chromatography (EA/PE=1/5). White solid. Yield: 91.4 mg, 87 %. <sup>1</sup>H NMR (400 MHz, Chloroform-*d*) δ 7.80 (s, 2H), 7.57 – 7.48 (m, 2H), 7.33 – 7.21 (m, 4H), 7.20 – 7.10 (m, 5H), 7.02 (td, *J* = 7.5, 6.9, 1.1 Hz, 2H), 6.95 (d, *J* = 2.4 Hz, 2H), 4.49 (t, *J* = 7.4 Hz, 1H), 2.73-1.69 (m, 2H), 2.60 – 2.45 (m, 2H). <sup>13</sup>C NMR (100 MHz, Chloroform-*d*) δ 142.8, 136.7, 128.7, 128.4, 127.2, 125.8, 121.9, 121.7, 120.1, 119.8, 119.2, 111.2, 37.5, 34.6, 33.6.

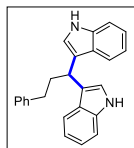

**3,3'-(3-phenylpropane-1,1-diyl)bis(5-methyl-1H-indole)(3b)**: Purified by silica-gel column chromatography (EA/PE=1/5). White solid. Yield: 112 mg, 99 %. <sup>1</sup>H NMR (400 MHz, Chloroform-*d*) δ 7.61 (s, 2H), 7.48 (s, 2H), 7.44 (t, *J* = 7.4 Hz, 2H), 7.38 – 7.30 (m, 3H), 7.27 (d, *J* = 6.6 Hz, 2H), 7.12 (dd, *J* = 8.3, 1.6 Hz, 2H), 6.91 (d, *J* = 2.4 Hz, 2H), 4.58 (t, *J* = 7.3 Hz, 1H), 2.89-2.85 (m, 2H), 2.67-2.60 (m, 2H), 2.56 (s, 6H). <sup>13</sup>C NMR (100 MHz, Chloroform-*d*) δ 142.9, 135.1, 128.8, 128.4, 128.3, 127.4, 125.9, 123.5, 122.0, 119.6, 119.4, 111.0, 37.6, 34.6, 33.4, 21.7; **ESI-HRMS**: *m/z* calculated for C<sub>27</sub>H<sub>25</sub>N<sub>2</sub>[M-H]<sup>-</sup>: 377.2023; found: 377.2023

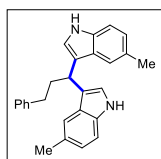

**3,3'-(3-phenylpropane-1,1-diyl)bis(5-methoxy-1H-indole)(3c)**: Purified by silica-gel column chromatography (EA/PE=1/3). White solid. Yield: 111.9 mg, 89 %. <sup>1</sup>H NMR (400 MHz, Chloroform-*d*) δ 7.80 (s, 2H), 7.35 (t, *J* = 7.5 Hz, 2H), 7.30 – 7.22 (m, 4H), 7.21 (s, 1H), 7.00 (dd, *J* = 22.7, 2.4 Hz, 4H), 6.89 (dd, *J* = 8.7, 2.4 Hz, 2H), 4.43 (t, *J* = 7.3 Hz, 1H), 3.82 (s, 6H), 2.78 (t, *J* = 7.5 Hz, 2H), 2.65 – 2.52 (m, 2H). <sup>13</sup>C NMR (100 MHz, Chloroform-*d*) δ 153.7, 142.8, 131.9, 128.8, 128.4, 127.6, 125.8, 122.5, 119.7, 111.9, 111.8, 101.8, 56.0, 37.3, 34.3, 33.0. **ESI-HRMS**: *m/z* calculated for C<sub>27</sub>H<sub>25</sub>N<sub>2</sub>O<sub>2</sub>[M-H]<sup>-</sup>: 409.1921; found: 409.1922.

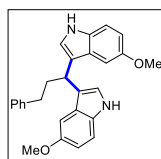

**3,3'-(3-phenylpropane-1,1-diyl)bis(1H-indol-5-amine)(3d)**: Purified by silica-gel column chromatography (DCM/MeOH=10/1). Red solid. Yield: 50.2 mg, 44 %. <sup>1</sup>H NMR (400 MHz, DMSO-*d*<sub>6</sub>) δ 10.26 (s, 2H), 7.35 – 7.24 (m, 2H), 7.18 (d, *J* = 7.4 Hz, 3H), 7.04 (d, *J* = 8.5 Hz, 2H), 6.97 (d, *J* = 2.1 Hz, 2H), 6.71 (d, *J* = 2.0 Hz, 2H), 6.46 (dd, *J* = 8.5, 2.1 Hz, 2H), 4.39-4.15 (m, 5H), 2.65-2.61 (m, 2H), 2.43-2.37 (m, 2H). <sup>13</sup>C NMR (100 MHz, DMSO-*d*<sub>6</sub>) δ 143.0, 140.6, 131.0, 128.8, 128.7, 128.0, 126.0, 122.3, 117.6, 112.0, 111.9, 103.1, 37.4, 34.7, 34.0; **ESI-HRMS**: *m/z* calculated for C<sub>25</sub>H<sub>25</sub>N<sub>4</sub>[M+H]<sup>+</sup>: 381.2074; found: 381.2074.

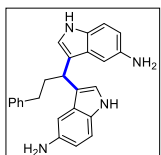

**3,3'-(3-phenylpropane-1,1-diyl)bis(5-fluoro-1H-indole)(3e)**: Purified by silica-gel column chromatography (PE/EA=5/1). Yellow solid. Yield: 114.6 mg, 99 %. <sup>1</sup>H NMR (400 MHz, Chloroform-*d*) δ 7.76 (s, 2H), 7.19 (dd, *J* = 8.1, 6.8 Hz, 2H), 7.12 – 7.04 (m, 5H), 7.01 (dd, *J* = 9.9, 2.6 Hz, 2H), 6.94 (d, *J* = 2.4 Hz, 2H), 6.78 (td, *J* = 9.1, 2.5 Hz, 2H), 4.22 (t, *J* = 7.4 Hz, 1H), 2.60-2.56 (m, 2H), 2.46 – 2.34 (m, 2H). <sup>13</sup>C NMR (100 MHz, Chloroform-*d*) δ 158.7, 156.4, 142.4, 133.3, 128.6 (d, *J*-F = 15.8 Hz), 127.3 (d, *J*-F = 9.7 Hz), 126.0, 123.4, 119.8 (d, *J*-F = 4.7 Hz), 111.8 (d, *J*-F = 9.7 Hz), 110.4 (d, *J*-F = 26.4 Hz), 104.6 (d, *J*-F = 23.5 Hz), 36.9, 34.4, 33.7. **ESI-HRMS**: *z/s* calculated for C<sub>25</sub>H<sub>19</sub>F<sub>2</sub>N<sub>2</sub>[M-H]<sup>-</sup>: 385.1521; found: 385.1522.

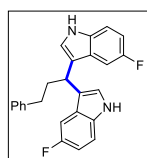

**3,3'-(3-phenylpropane-1,1-diyl)bis(5-chloro-1H-indole)(3f):** Purified by silica-gel column

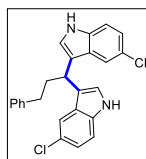

chromatography (PE/EA=3/1). Yellow solid. Yield: 112.8 mg, 90 %.  $^1\text{H}$  NMR (400 MHz, Chloroform-*d*)  $\delta$  7.99 (s, 2H), 7.43 (d,  $J$  = 2.0 Hz, 2H), 7.34 – 7.26 (m, 3H), 7.22 (d,  $J$  = 10.7 Hz, 2H), 7.20 – 7.14 (m, 2H), 7.14 – 7.02 (m, 4H), 4.35 (t,  $J$  = 7.4 Hz, 1H), 2.71-2.67 (m, 2H), 2.60 – 2.44 (m, 2H).  $^{13}\text{C}$  NMR (100 MHz, Chloroform-*d*)  $\delta$  142.2, 135.0, 128.6, 128.4, 127.9, 125.9, 124.9, 122.9, 122.3, 119.3, 119.0, 112.2, 36.8, 34.3, 33.4. **ESI-HRMS:**  $z/s$  calculated for  $\text{C}_{25}\text{H}_{19}\text{Cl}_2\text{N}_2[\text{M}-\text{H}]^-$ : 417.0930; found: 417.0930.

**3,3'-(3-phenylpropane-1,1-diyl)bis(5-bromo-1H-indole)(3g):** Purified by silica-gel column

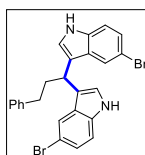

chromatography (PE/EA=5/1). White solid. Yield: 124.7 mg, 82 %.  $^1\text{H}$  NMR (400 MHz, Chloroform-*d*)  $\delta$  8.01 – 7.90 (m, 2H), 7.59 (d,  $J$  = 1.7 Hz, 2H), 7.34 – 7.28 (m, 2H), 7.25 – 7.14 (m, 7H), 7.04 (d,  $J$  = 2.4 Hz, 2H), 4.34 (t,  $J$  = 7.4 Hz, 1H), 2.71-2.67 (m, 2H), 2.58 – 2.44 (m, 2H).  $^{13}\text{C}$  NMR (100 MHz, Chloroform-*d*)  $\delta$  142.1, 135.3, 128.6, 128.6, 128.4, 125.9, 124.8, 122.7, 122.1, 119.2, 112.6, 112.5, 36.9, 34.3, 33.3. **ESI-HRMS:**  $z/s$  calculated for  $\text{C}_{25}\text{H}_{19}\text{Br}_2\text{N}_2[\text{M}-\text{H}]^-$ : 506.9900; found: 506.9902.

**3,3'-(3-phenylpropane-1,1-diyl)bis(1H-indole-5-carbonitrile)(3j):** Purified by silica-gel column

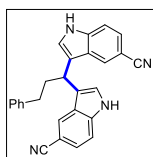

chromatography (DCM/MeOH=10/1). White solid. Yield: 30.1 mg, 25 %.  $^1\text{H}$  NMR (400 MHz, DMSO-*d*<sub>6</sub>)  $\delta$  11.46 (d,  $J$  = 2.4 Hz, 2H), 8.02 (s, 2H), 7.70 (d,  $J$  = 2.3 Hz, 2H), 7.48 (d,  $J$  = 8.4 Hz, 2H), 7.35 (dd,  $J$  = 8.4, 1.6 Hz, 2H), 7.27 (dd,  $J$  = 8.2, 6.9 Hz, 2H), 7.18 (d,  $J$  = 7.3 Hz, 3H), 4.52 (t,  $J$  = 7.2 Hz, 1H), 2.62-2.57 (m, 2H), 2.56 – 2.52 (m, 2H).  $^{13}\text{C}$  NMR (100 MHz, DMSO-*d*<sub>6</sub>)  $\delta$  142.5, 138.7, 128.8, 128.7, 126.6, 126.2, 125.6, 125.0, 124.0, 121.4, 119.6, 113.2, 100.6, 36.8, 34.4, 33.2. **ESI-HRMS:**  $z/s$  calculated for  $\text{C}_{27}\text{H}_{21}\text{N}_4\text{O}[\text{M}+\text{OH}]^+$ : 417.1721; found: 417.1721.

**3,3'-(3-phenylpropane-1,1-diyl)bis(5-iodo-1H-indole)(3h):** Purified by silica-gel column

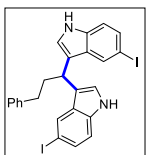

chromatography (PE/EA=3/1). White solid. Yield: 114.4 mg, 63 %.  $^1\text{H}$  NMR (400 MHz, Chloroform-*d*)  $\delta$  7.92 (s, 2H), 7.81 (d,  $J$  = 1.7 Hz, 2H), 7.40 (dd,  $J$  = 8.5, 1.7 Hz, 2H), 7.33 (t,  $J$  = 7.5 Hz, 2H), 7.25 – 7.14 (m, 3H), 7.10 (d,  $J$  = 8.5 Hz, 2H), 6.95 (d,  $J$  = 2.4 Hz, 2H), 4.32 (t,  $J$  = 7.4 Hz, 1H), 2.68 (dd,  $J$  = 8.8, 6.4 Hz, 2H), 2.58 – 2.42 (m, 2H).  $^{13}\text{C}$  NMR (100 MHz, Chloroform-*d*)  $\delta$  142.2, 135.8, 130.7, 129.5, 128.7, 128.6, 128.5, 126.1, 122.4, 119.0, 113.3, 82.9, 37.0, 34.3, 33.1. **ESI-HRMS:**  $z/s$  calculated for  $\text{C}_{25}\text{H}_{19}\text{I}_2\text{N}_2[\text{M}-\text{H}]^-$ : 600.9643; found: 600.9643.

**3,3'-(3-phenylpropane-1,1-diyl)bis(7-methyl-1H-indole)(3m):** Purified by silica-gel column

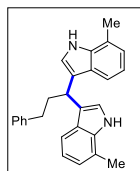

chromatography (PE/EA=3/1). White solid. Yield: 101 mg, 89 %.  $^1\text{H}$  NMR (400 MHz, Chloroform-*d*)  $\delta$  7.56 (s, 2H), 7.38 (dd,  $J$  = 6.7, 2.3 Hz, 2H), 7.24 (dd,  $J$  = 8.0, 6.6 Hz, 2H), 7.19 – 7.12 (m, 3H), 7.01 – 6.86 (m, 4H), 6.81 (d,  $J$  = 2.4 Hz, 2H), 4.44 (t,  $J$  = 7.3 Hz, 1H), 2.71-2.67 (m, 2H), 2.59 – 2.43 (m, 2H), 2.37 (s, 6H).  $^{13}\text{C}$  NMR (100 MHz, Chloroform-*d*)  $\delta$  142.8, 136.3, 128.7, 128.4, 126.8, 125.8, 122.4, 121.4, 120.7, 120.3, 119.4, 117.5, 37.5, 34.6, 33.8, 16.6. **ESI-HRMS:**  $m/z$  calculated for  $\text{C}_{27}\text{H}_{25}\text{N}_2[\text{M}-\text{H}]^-$ : 377.2023; found: 377.2023.

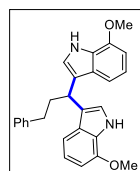

**3,3'-(3-phenylpropane-1,1-diyl)bis(7-methoxy-1H-indole)(3n):** Purified by silica-gel column chromatography (PE/EA=5/1). White solid. Yield: 96.8 mg, 79 %.  $^1\text{H}$  NMR (400 MHz, Chloroform-*d*)  $\delta$  8.20 (s, 2H), 7.33 (d,  $J$  = 7.2 Hz, 2H), 7.26 – 7.21 (m, 5H),

7.10 – 6.94 (m, 4H), 6.68 (d,  $J = 7.7$  Hz, 2H), 4.53 (t,  $J = 7.4$  Hz, 1H), 3.98 (s, 6H), 2.84 – 2.74 (m, 2H), 2.61 (d,  $J = 8.0$  Hz, 2H).  $^{13}\text{C}$  NMR (100 MHz, Chloroform- $d$ )  $\delta$  146.2, 142.8, 128.7, 128.6, 128.4, 127.2, 125.7, 121.5, 120.7, 119.5, 112.7, 101.8, 55.4, 37.6, 34.6, 33.9. **ESI-HRMS**:  $m/z$  calculated for  $\text{C}_{27}\text{H}_{25}\text{N}_2\text{O}_2[\text{M}-\text{H}]^-$ : 409.1921; found: 409.1922.

**3,3'-(3-phenylpropane-1,1-diyl)bis(2-methyl-1H-indole)(3k)<sup>[9]</sup>**: Purified by silica-gel column chromatography (PE/EA=3/1). Pale yellow solid. Yield: 86 mg, 76 %.  $^1\text{H}$  NMR (400 MHz, Chloroform- $d$ )  $\delta$  7.65 (s, 2H), 7.62 (d,  $J = 8$  Hz, 2H), 7.27-7.21 (m, 4H), 7.19 – 7.11 (m, 3H), 7.05 (ddd,  $J = 8.0, 7.0, 1.3$  Hz, 2H), 6.98 (ddd,  $J = 8.0, 7.0, 1.2$  Hz, 2H), 4.45 (t,  $J = 7.3$  Hz, 1H), 2.83 – 2.66 (m, 4H), 2.28 (s, 6H).  $^{13}\text{C}$  NMR (100 MHz, Chloroform- $d$ )  $\delta$  142.7, 135.3, 131.0, 128.7, 128.6, 128.4, 125.8, 120.6, 119.5, 119.2, 114.7, 110.3, 36.4, 35.0, 34.5, 12.9.

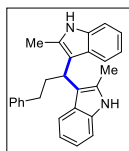

**3,3'-(3-phenylpropane-1,1-diyl)bis(7-bromo-1H-indole)(3o)**: Purified by silica-gel column chromatography (PE/EA=10/1). Pink solid. Yield: 106.6 mg, 70 %.  $^1\text{H}$  NMR (400 MHz, Chloroform- $d$ )  $\delta$  8.08 (s, 2H), 7.50 (d,  $J = 8.0$  Hz, 2H), 7.40-7.35 (m, 4H), 7.29 (d,  $J = 7.3$  Hz, 1H), 7.25 – 7.19 (m, 2H), 7.02 (d,  $J = 2.4$  Hz, 2H), 6.97 (t,  $J = 7.8$  Hz, 2H), 4.49 (t,  $J = 7.4$  Hz, 1H), 2.79-2.75 (m, 2H), 2.68 – 2.49 (m, 2H).  $^{13}\text{C}$  NMR (100 MHz, Chloroform- $d$ )  $\delta$  142.3, 135.3, 128.6, 128.5, 128.2, 126.0, 124.4, 122.2, 121.0, 120.5, 118.9, 104.9, 37.2, 34.4, 33.8. **ESI-HRMS**:  $z/s$  calculated for  $\text{C}_{25}\text{H}_{19}\text{Br}_2\text{N}_2[\text{M}-\text{H}]^-$ : 506.9900; found: 506.9902.

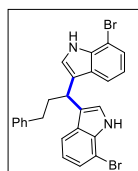

**3,3'-(3-phenylpropane-1,1-diyl)bis(1H-pyrrolo[2,3-b]pyridine)(3p)**: Purified by silica-gel column chromatography (PE/EA=1/1). White solid. Yield: 90.7 mg, 86 %.  $^1\text{H}$  NMR (400 MHz, DMSO- $d_6$ )  $\delta$  11.40 (s, 2H), 8.14 (dt,  $J = 4.6, 1.9$  Hz, 2H), 7.85 (dd,  $J = 7.9, 1.6$  Hz, 2H), 7.49 (t,  $J = 2.9$  Hz, 2H), 7.32 – 7.19 (m, 2H), 7.17 (dd,  $J = 7.5, 4.7$  Hz, 3H), 6.93 (dd,  $J = 7.9, 4.6$  Hz, 2H), 4.75 – 4.05 (m, 1H), 2.71 – 2.56 (m, 2H), 2.57 – 2.50 (m, 2H).  $^{13}\text{C}$  NMR (100 MHz, DMSO- $d_6$ )  $\delta$  149.4, 149.3, 142.7, 142.6, 128.9, 128.8, 127.5, 126.2, 123.1, 119.7, 117.4, 115.6, 36.6, 34.4, 34.0. **ESI-HRMS**:  $m/z$  calculated for  $\text{C}_{23}\text{H}_{21}\text{N}_4[\text{M}+\text{H}]^+$ : 353.1761; found: 353.1761.

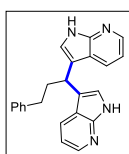

**3,3'-(3-phenylpropane-1,1-diyl)bis(6-methyl-1H-indole)(3q)**: Purified by silica-gel column chromatography (PE/EA=5/1). Blue solid. Yield: 99.5 mg, 83 %.  $^1\text{H}$  NMR (400 MHz, Chloroform- $d$ )  $\delta$  7.62 (s, 2H), 7.48 (d,  $J = 8.1$  Hz, 2H), 7.33 (t,  $J = 7.3$  Hz, 2H), 7.26 – 7.20 (m, 3H), 7.11 (s, 2H), 6.93 (dd,  $J = 8.1, 1.4$  Hz, 2H), 6.87 (d,  $J = 2.3$  Hz, 2H), 4.50 (t,  $J = 7.3$  Hz, 1H), 2.79-2.75 (m, 2H), 2.61 – 2.54 (m, 2H), 2.50 (s, 6H).  $^{13}\text{C}$  NMR (100 MHz, Chloroform- $d$ )  $\delta$  142.9, 137.2, 131.6, 128.7, 128.4, 125.8, 125.1, 121.0, 120.9, 120.0, 119.4, 111.2, 37.5, 34.6, 33.7, 21.8. **ESI-HRMS**:  $m/z$  calculated for  $\text{C}_{27}\text{H}_{25}\text{N}_2[\text{M}-\text{H}]^-$ : 377.2023; found: 377.2023.

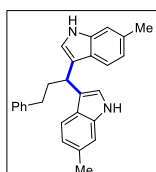

**3,3'-(3-phenylpropane-1,1-diyl)bis(6-chloro-1H-indole)(3r)**: Purified by silica-gel column chromatography (PE/EA=3/1). White solid. Yield: 90.1 mg, 72 %.  $^1\text{H}$  NMR (400 MHz, Chloroform- $d$ )  $\delta$  7.91 (s, 2H), 7.37 (d,  $J = 8.5$  Hz, 2H), 7.33 – 7.26 (m, 4H), 7.24 – 7.19 (m, 1H), 7.19 – 7.13 (m, 2H), 7.00 (t,  $J = 2.4$  Hz, 3H), 6.98 (d,  $J = 1.8$  Hz, 1H), 4.41 (t,  $J = 7.4$  Hz, 1H), 2.71-2.67 (m, 2H), 2.60 – 2.43 (m, 2H).  $^{13}\text{C}$  NMR (100 MHz, Chloroform- $d$ )  $\delta$  142.4, 137.1, 128.7, 128.5, 128.0, 126.0, 125.7, 122.2, 120.5,

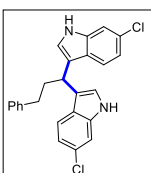

120.1, 120.0, 111.2, 37.3, 34.4, 33.4. **ESI-HRMS:**  $m/z$  calculated for  $C_{25}H_{19}Cl_2N_2[M-H]^+$ : 417.0930; found: 417.0931.

**3,3'-(3-phenylpropane-1,1-diyl)bis(4-methyl-1H-indole)(3s):** Purified by silica-gel column chromatography (PE/EA=3/1). Yellow solid. Yield: 49 mg, 43 %.

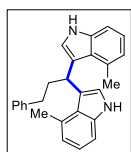

$^1H$  NMR (400 MHz, Chloroform-*d*)  $\delta$  7.79 (s, 2H), 7.30 (dd,  $J = 8.5, 6.4$  Hz, 2H), 7.24 – 7.16 (m, 5H), 7.08 (t,  $J = 7.6$  Hz, 2H), 6.83 (d,  $J = 7.1$  Hz, 2H), 6.76 (d,  $J = 2.5$  Hz, 2H), 5.12 (t,  $J = 7.2$  Hz, 1H), 2.96-2.92 (m, 2H), 2.55 (s, 6H), 2.43 – 2.33 (m, 2H).  $^{13}C$  NMR (100 MHz, Chloroform-*d*)  $\delta$  142.7, 137.3, 131.1, 128.7, 128.4, 125.9, 125.5, 122.2, 122.0, 121.9, 121.2, 109.1, 40.4, 34.9, 34.6, 20.2; **ESI-HRMS:**  $m/z$  calculated for  $C_{27}H_{25}N_2[M-H]^+$ : 377.2023; found: 377.2023.

**3,3'-(3-(*p*-tolyl)propane-1,1-diyl)bis(1H-indole)(3t):** Purified by silica-gel column chromatography

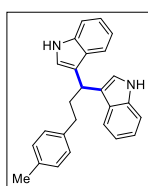

(PE/EA=3/1). White solid. Yield: 94.4 mg, 86 %.  $^1H$  NMR (400 MHz, Chloroform-*d*)  $\delta$  7.68 (s, 2H), 7.64 (d,  $J = 7.9$  Hz, 2H), 7.31 (d,  $J = 8.1$  Hz, 2H), 7.25 – 7.21 (m, 2H), 7.20 – 7.09 (m, 6H), 6.92 (d,  $J = 2.4$  Hz, 2H), 4.57 (t,  $J = 7.3$  Hz, 1H), 2.77-2.74 (m, 2H), 2.68 – 2.52 (m, 2H), 2.42 (s, 3H).  $^{13}C$  NMR (100 MHz, Chloroform-*d*)  $\delta$  139.6, 136.6, 135.2, 129.1, 128.5, 127.1, 121.8, 121.7, 120.1, 119.7, 119.1, 111.2, 37.6, 34.1, 33.6, 21.1. **ESI-HRMS:**  $m/z$  calculated for  $C_{26}H_{23}N_2[M-H]^+$ : 363.1866; found: 363.1867.

**3,3'-(3-(4-methoxyphenyl)propane-1,1-diyl)bis(1H-indole)(3u):** Purified by silica-gel column

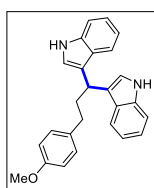

chromatography (PE/EA=3/1). White solid. Yield: 85.8 mg, 75 %.  $^1H$  NMR (400 MHz, Chloroform-*d*)  $\delta$  7.78 (s, 2H), 7.64 – 7.57 (m, 2H), 7.32 (d,  $J = 8.1$  Hz, 2H), 7.23 – 7.16 (m, 2H), 7.15 – 7.06 (m, 4H), 6.94 (d,  $J = 2.4$  Hz, 2H), 6.88 (d,  $J = 8.6$  Hz, 2H), 4.53 (t,  $J = 7.3$  Hz, 1H), 3.83 (s, 3H), 2.72-2.68 (m, 2H), 2.62 – 2.48 (m, 2H).  $^{13}C$  NMR (100 MHz, Chloroform-*d*)  $\delta$  157.7, 136.7, 134.8, 129.6, 127.1, 121.9, 121.7, 120.1, 119.7, 119.1, 113.8, 111.2, 55.4, 37.7, 33.6, 33.4. **ESI-HRMS:**  $m/z$  calculated for  $C_{26}H_{23}N_2O[M-H]^+$ : 379.1815; found: 379.1516.

**3,3'-(3-(4-fluorophenyl)propane-1,1-diyl)bis(1H-indole)(3v):** Purified by silica-gel column

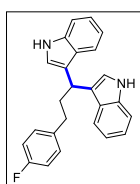

chromatography (PE/EA=5/1). Off-white solid. Yield: 75.1 mg, 68 %.  $^1H$  NMR (400 MHz, Chloroform-*d*)  $\delta$  7.86 (s, 2H), 7.56 (d,  $J = 7.9$  Hz, 2H), 7.33 (d,  $J = 8.1$  Hz, 2H), 7.18 (dd,  $J = 8.2, 6.9$  Hz, 2H), 7.12 (dd,  $J = 8.3, 5.5$  Hz, 2H), 7.06 (t,  $J = 7.5$  Hz, 2H), 7.02 – 6.93 (m, 4H), 4.50 (t,  $J = 7.4$  Hz, 1H), 2.72-2.69 (m, 2H), 2.57-2.51 (m, 2H).  $^{13}C$  NMR (100 MHz, Chloroform-*d*)  $\delta$  162.5, 160.1, 138.28 (d,  $J_{C-F} = 3.1$  Hz), 136.7, 123.0 (d,  $J_{C-F} = 7.7$  Hz), 127.1, 121.8 (d,  $J_{C-F} = 33.3$  Hz), 120.0, 119.7, 119.2, 115.1 (d,  $J_{C-F} = 21.0$  Hz), 111.3, 37.6, 33.75, 33.5.  $^{19}F$  NMR (400 MHz, Chloroform-*d*)  $\delta$  -117.98. **ESI-HRMS:**  $m/z$  calculated for  $C_{25}H_{20}FN_2[M-H]^+$ : 367.1616; found: 367.1616.

**3,3'-(3-(4-chlorophenyl)propane-1,1-diyl)bis(1H-indole)(3w):** Purified by silica-gel column

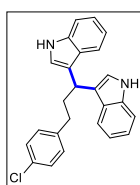

chromatography (PE/EA=5/1). Pale yellow solid. Yield: 107.3 mg, 93 %.  $^1H$  NMR (400 MHz, Chloroform-*d*)  $\delta$  7.91 (s, 2H), 7.55 (d,  $J = 8.0$ , 2H), 7.34 (d,  $J = 8.1$ , 2H), 7.25 – 7.21 (m, 2H), 7.19-7.15 (m, 2H), 7.11 – 6.98 (m, 6H), 4.49 (t,  $J = 7.4$  Hz, 1H), 2.71-2.67 (m, 2H), 2.62 – 2.48 (m, 2H).  $^{13}C$  NMR (100 MHz, Chloroform-*d*)  $\delta$  141.1, 136.7, 131.4, 130.0, 128.4, 127.1, 122.0, 121.6, 119.9, 119.7, 119.2, 111.3, 37.4, 33.9, 33.5.

**ESI-HRMS:**  $m/z$  calculated for  $C_{25}H_{20}ClN_2[M-H]^+$ : 383.1320; found: 383.1320.

**3,3'-(3-(4-bromophenyl)propane-1,1-diyl)bis(1H-indole)(3x):** Purified by silica-gel column chromatography (PE/EA=5/1). Off-white solid. Yield: 107.8 mg, 84 %. <sup>1</sup>H NMR (400 MHz, Chloroform-*d*) δ 7.84 (s, 2H), 7.57 (d, *J* = 8.0, 2H), 7.42 – 7.37 (m, 2H), 7.33 (d, *J* = 8.0, 2H), 7.20-7.16 (m, 2H), 7.10 – 7.00 (m, 4H), 6.97 (d, *J* = 2.4 Hz, 2H), 4.48 (d, *J* = 7.4 Hz, 1H), 2.70-2.66 (m, 2H), 2.64 – 2.48 (m, 2H). <sup>13</sup>C NMR (100 MHz, Chloroform-*d*) δ 141.7, 136.7, 131.4, 130.5, 127.1, 122.0, 121.6, 119.9, 119.7, 119.5, 119.3, 111.3, 37.3, 33.9, 33.5; **ESI-HRMS:** *m/z* calculated for C<sub>25</sub>H<sub>20</sub>BrN<sub>2</sub>[M-H]<sup>-</sup>: 427.0815, 429.0794; found: 427.0815, 429.0798.

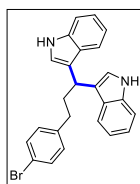

**3,3'-(3-(4-(trifluoromethyl)phenyl)propane-1,1-diyl)bis(1H-indole)(3y):** Purified by silica-gel column chromatography (PE/EA=3/1). Yellow solid. Yield: 45 mg, 36 %. <sup>1</sup>H NMR (400 MHz, Chloroform-*d*) δ 7.91 (s, 2H), 7.57 – 7.54 (m, 2H), 7.52 (d, *J* = 8.0 Hz, 2H), 7.35 (d, *J* = 8.2, 2H), 7.25 (s, 2H), 7.20-7.15 (m, 2H), 7.07-7.03 (m, 2H), 7.02 (d, *J* = 2.4 Hz, 2H), 4.51 (t, *J* = 7.4 Hz, 1H), 2.80-2.76 (m, 2H), 2.61 – 2.53 (m, 2H). <sup>13</sup>C NMR (100 MHz, Chloroform-*d*) δ 146.9, 136.8, 129.0, 128.8, 127.1, 125.3, 125.3, 122.1, 121.6, 119.9, 119.7, 119.3, 111.3, 37.2, 34.5, 33.7. <sup>19</sup>F NMR (400 MHz, Chloroform-*d*) δ -62.19. **ESI-HRMS:** *m/z* calculated for C<sub>26</sub>H<sub>20</sub>F<sub>3</sub>N<sub>2</sub>[M-H]<sup>-</sup>: 417.1584; found: 417.1584.

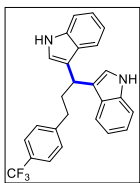

**3,3'-(3-(2-chlorophenyl)propane-1,1-diyl)bis(1H-indole)(3z):** Purified by silica-gel column chromatography (PE/EA=10/1). White solid. Yield: 103.1 mg, 92 %. <sup>1</sup>H NMR (400 MHz, Chloroform-*d*) δ 7.85 (s, 2H), 7.61 (d, *J* = 8.0, 2H), 7.37-7.32 (m, 3H), 7.22 – 7.10 (m, 5H), 7.09-7.05 (m, 2H), 7.01 (d, *J* = 2.4, 2H), 4.58 (t, *J* = 7.4 Hz, 1H), 2.95 – 2.82 (m, 2H), 2.63 – 2.49 (m, 2H). <sup>13</sup>C NMR (100 MHz, Chloroform-*d*) δ 140.4, 136.7, 134.1, 130.7, 129.6, 127.3, 127.2, 126.8, 121.9, 121.7, 120.0, 119.7, 119.2, 111.2, 35.8, 34.0, 32.8. **ESI-HRMS:** *m/z* calculated for C<sub>25</sub>H<sub>20</sub>ClN<sub>2</sub>[M-H]<sup>-</sup>: 383.1320; found: 383.1320.

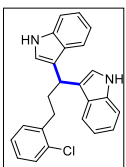

**3,3'-(3-(3-chlorophenyl)propane-1,1-diyl)bis(1H-indole)(3aa):** Purified by silica-gel column chromatography (PE/EA=10/1). Pale yellow solid. Yield: 107 mg, 93 %. <sup>1</sup>H NMR (400 MHz, Chloroform-*d*) δ 7.81 (s, 2H), 7.58 (d, *J* = 7.9, 2H), 7.33 (d, *J* = 8.1 Hz, 2H), 7.25 – 7.15 (m, 5H), 7.12 – 7.02 (m, 3H), 6.96 (d, *J* = 2.4 Hz, 2H), 4.51 (t, *J* = 7.4 Hz, 1H), 2.73-2.69 (m, 2H), 2.63 – 2.46 (m, 2H). <sup>13</sup>C NMR (100 MHz, Chloroform-*d*) δ 144.8, 136.7, 134.1, 129.6, 128.8, 127.1, 126.9, 126.0, 122.0, 121.7, 119.9, 119.7, 119.3, 111.3, 37.3, 34.2, 33.6; **ESI-HRMS:** *m/z* calculated for C<sub>25</sub>H<sub>20</sub>ClN<sub>2</sub>[M-H]<sup>-</sup>: 383.1320; found: 383.1320.

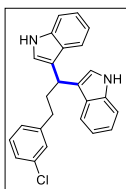

**3,3'-(3-(naphthalen-1-yl)propane-1,1-diyl)bis(1H-indole)(3ab):** Purified by silica-gel column chromatography (PE/EA=3/1). White solid. Yield: 102.9 mg, 86 %. <sup>1</sup>H NMR (400 MHz, Chloroform-*d*) δ 7.74 (q, *J* = 4.4 Hz, 4H), 7.60 (d, *J* = 8.2 Hz, 1H), 7.46 (d, *J* = 7.9 Hz, 2H), 7.34 (t, *J* = 7.5 Hz, 1H), 7.29-7.24 (m, 2H), 7.20 (t, *J* = 8.6 Hz, 3H), 7.06 (t, *J* = 7.6 Hz, 2H), 6.94 (d, *J* = 7.6 Hz, 2H), 6.90 (d, *J* = 2.5 Hz, 2H), 4.52 (t, *J* = 7.4 Hz, 1H), 3.15 – 3.01 (m, 2H), 2.66 – 2.52 (m, 2H). <sup>13</sup>C NMR (100 MHz, Chloroform-*d*) δ 139.0, 136.8, 134.0, 128.8, 127.2, 126.6, 126.1, 125.8, 125.7, 125.5, 124.2, 122.0, 121.7, 120.1, 119.8, 119.2, 111.2, 36.9, 34.3, 31.9; **ESI-HRMS:** *m/z* calculated for C<sub>29</sub>H<sub>23</sub>N<sub>2</sub>[M-H]<sup>-</sup>: 399.1866; found: 399.1867.

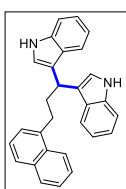

**3,3'-(3-(furan-3-yl)propane-1,1-diyl)bis(1H-indole)(3ac):** Purified by silica-gel column

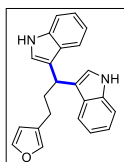

chromatography (PE/EA=5/1). Off-white solid. Yield: 88.9 mg, 87 %.  $^1\text{H}$  NMR (400 MHz, Chloroform-*d*)  $\delta$  7.77 (s, 2H), 7.61 (d,  $J$  = 7.9 Hz, 2H), 7.38 (d,  $J$  = 1.8 Hz, 1H), 7.32 (d,  $J$  = 8.1 Hz, 2H), 7.24 – 7.15 (m, 2H), 7.09 (t,  $J$  = 7.4 Hz, 2H), 6.94 (d,  $J$  = 2.4 Hz, 2H), 6.34 (d,  $J$  = 3.1, 1H), 6.02 (d,  $J$  = 3.1 Hz, 1H), 4.55 (t,  $J$  = 7.4 Hz, 1H), 2.77 (t,  $J$  = 7.6 Hz, 2H), 2.60 (q,  $J$  = 7.5 Hz, 2H).  $^{13}\text{C}$  NMR (100 MHz, Chloroform-*d*)  $\delta$  156.4, 140.9, 136.7, 127.1, 121.9, 121.7, 119.8, 119.7, 119.2, 111.2, 110.3, 105.1, 33.9, 33.5, 26.8; **ESI-HRMS**:  $m/z$  calculated for  $\text{C}_{23}\text{H}_{19}\text{N}_2\text{O}$ [M-H] $^-$ : 339.1502; found: 339.1503.

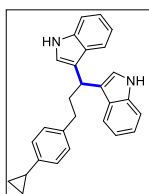

**3,3'-(3-(4-cyclopropylphenyl)propane-1,1-diyl)bis(1H-indole)(3ad)**: Purified by silica-gel column chromatography (PE/EA=5/1). White solid. Yield: 107.7 mg, 92 %.  $^1\text{H}$  NMR (400 MHz, Chloroform-*d*)  $\delta$  7.73 (s, 2H), 7.52 (d,  $J$  = 8 Hz, 2H), 7.26 (d,  $J$  = 8 Hz, 2H), 7.12 (t,  $J$  = 7.5 Hz, 2H), 7.06 – 6.95 (m, 6H), 6.90 (d,  $J$  = 2.4 Hz, 2H), 4.46 (t,  $J$  = 7.3 Hz, 1H), 2.67–2.63 (m, 2H), 2.56 – 2.45 (m, 2H), 1.88–1.81 (m, 1H), 0.97 – 0.86 (m, 2H), 0.67–0.63 (m, 2H).  $^{13}\text{C}$  NMR (100 MHz, Chloroform-*d*)  $\delta$  141.3, 139.8, 136.7, 128.6, 127.2, 125.7, 121.9, 121.7, 120.2, 119.8, 119.2, 111.2, 37.6, 34.1, 33.6, 15.2, 9.1. **ESI-HRMS**:  $m/z$  calculated for  $\text{C}_{28}\text{H}_{25}\text{N}_2$  [M-H] $^-$ : 389.2023; found: 389.2032.

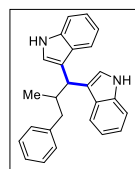

**3,3'-(2-methyl-3-phenylpropane-1,1-diyl)bis(1H-indole)(3ae)**: Purified by silica-gel column chromatography (PE/EA=5/1). Off-white solid. Yield: 67.8 mg, 62 %.  $^1\text{H}$  NMR (400 MHz, Chloroform-*d*)  $\delta$  7.91 (s, 2H), 7.74 – 7.61 (m, 2H), 7.35 – 7.30 (m, 2H), 7.28–7.24 (m, 2H), 7.20–7.12 (m, 7H), 7.10–7.05 (m, 2H), 4.49 (d,  $J$  = 7.8 Hz, 1H), 3.03 (dd,  $J$  = 13.3, 3.8 Hz, 1H), 2.92 – 2.73 (m, 1H), 2.35 (dd,  $J$  = 13.3, 10.0 Hz, 1H), 0.95 (d,  $J$  = 6.6 Hz, 3H).  $^{13}\text{C}$  NMR (100 MHz, Chloroform-*d*)  $\delta$  142.2, 136.7, 136.5, 129.5, 128.3, 128.0, 127.8, 125.8, 122.1, 122.0, 122.0, 121.9, 112.0, 119.9, 119.8, 119.4, 119.3, 119.1, 111.3, 111.2, 42.2, 40.3, 39.9, 18.2. **ESI-HRMS**:  $m/z$  calculated for  $\text{C}_{26}\text{H}_{24}\text{N}_2\text{Na}$  [M+Na] $^+$ : 387.1832; found: 387.1820.

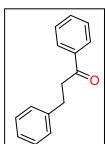

**1,3-diphenylpropan-1-one(3ag)**<sup>[10]</sup>: Purified by silica-gel column chromatography (PE/EA=10/1). Off-white oil. Yield: 30.9 mg, 49 %.  $^1\text{H}$  NMR (400 MHz, Chloroform-*d*)  $\delta$  8.00 (dd,  $J$  = 8.4, 1.3 Hz, 2H), 7.58 (d,  $J$  = 7.4 Hz, 1H), 7.49 (dd,  $J$  = 8.2, 6.9 Hz, 2H), 7.37 – 7.28 (m, 4H), 7.25 (s, 1H), 3.39 – 3.28 (m, 2H), 3.18 – 3.02 (m, 2H).

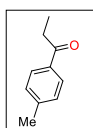

**1-(p-tolyl)propan-1-one(3ah)**<sup>[11]</sup>: Purified by silica-gel column chromatography (PE/EA=30/1). Pale yellow oil. Yield: 23.3 mg, 52 %.  $^1\text{H}$  NMR (400 MHz, Chloroform-*d*)  $\delta$  7.87 (d,  $J$  = 8.3 Hz, 2H), 7.25 (d,  $J$  = 8.3 Hz, 2H), 2.97 (q,  $J$  = 7.2 Hz, 2H), 2.41 (s, 3H), 1.22 (t,  $J$  = 7.2 Hz, 3H).  $^{13}\text{C}$  NMR (100 MHz, Chloroform-*d*)  $\delta$  200.5, 143.6, 134.5, 129.2, 128.1, 31.7, 21.6, 8.3.

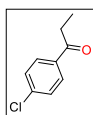

**1-(4-chlorophenyl)propan-1-one(3ai)**<sup>[11]</sup>: Purified by silica-gel column chromatography (PE/EA=30/1). Pale yellow oil. Yield: 35.9 mg, 71 %.  $^1\text{H}$  NMR (400 MHz, Chloroform-*d*)  $\delta$  7.89 (d,  $J$  = 8.6 Hz, 2H), 7.41 (d,  $J$  = 8.6 Hz, 2H), 2.96 (q,  $J$  = 7.2 Hz, 2H), 1.21 (t,  $J$  = 7.2 Hz, 3H).  $^{13}\text{C}$  NMR (100 MHz, Chloroform-*d*)  $\delta$  199.6, 139.4, 135.3, 129.5, 129.0, 31.9, 8.3.

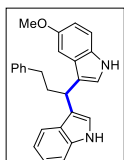

**3-(1-(1H-indol-3-yl)-3-phenylpropyl)-5-methoxy-1H-indole(4a)**: Purified by silica-gel column chromatography (PE/EA=5/1). Pale yellow solid. Yield: 54.7 mg, 48 %.  $^1\text{H}$  NMR (400 MHz, Chloroform-*d*)  $\delta$  7.89 (s, 1H), 7.76 (s, 1H), 7.57 (d,  $J$  = 7.9, 1H), 7.37 – 7.27 (m, 3H), 7.24 – 7.14 (m, 5H), 7.06–7.04 (m, 1H), 7.00 (d,  $J$  = 2.4 Hz, 1H), 6.96 (t,  $J$  = 2.9



Hz, 2H), 6.84 (dd,  $J = 8.8, 2.4$  Hz, 1H), 4.46 (t,  $J = 7.3$  Hz, 1H), 3.77 (s, 3H), 2.81 – 2.69 (m, 2H), 2.65 – 2.43 (m, 2H).  $^{13}\text{C}$  NMR (100 MHz, Chloroform- $d$ )  $\delta$  153.7, 142.8, 136.8, 131.9, 128.8, 128.4, 127.6, 127.3, 125.8, 122.5, 121.9, 121.7, 120.0, 112.0, 119.8, 119.2, 111.9, 111.9, 111.2, 101.8, 56.0, 37.4, 34.5, 33.4; **ESI-HRMS**:  $m/z$  calculated for  $\text{C}_{26}\text{H}_{23}\text{N}_2\text{O}[\text{M}+\text{H}]^+$ : 381.1962; found: 381.1961.

**5-methoxy-3-(1-(2-methyl-1H-indol-3-yl)-3-phenylpropyl)-1H-indole(4b)**<sup>[12]</sup>: Purified by silica-gel

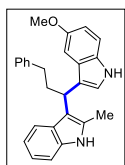

column chromatography (PE/EA=5/1). Yellow solid. Yield: 75.4 mg, 64 %.  $^1\text{H}$  NMR (400 MHz, Chloroform- $d$ )  $\delta$  7.74 (s, 1H), 7.72 (s, 1H), 7.66 (d,  $J = 7.8$ , 1H), 7.27 (d,  $J = 10.7$  Hz, 4H), 7.23 – 7.14 (m, 4H), 7.05 – 6.99 (m, 2H), 6.82 (d,  $J = 2.5$  Hz, 1H), 6.78 (dd,  $J = 8.7, 2.4$  Hz, 1H), 4.43 – 4.32 (m, 1H), 3.71 (s, 3H), 2.80 – 2.54 (m, 4H), 2.33 (s, 3H).  $^{13}\text{C}$  NMR (100 MHz, Chloroform- $d$ )  $\delta$  153.6, 142.8, 135.6, 131.8, 131.2, 128.7, 128.4, 128.3, 127.8, 125.8, 122.0, 120.7, 120.3, 119.6, 119.0, 113.6, 111.8, 111.7, 110.4, 101.6, 55.8, 36.0, 34.5, 33.0, 12.4.

**5-methoxy-3-(1-(6-methyl-1H-indol-3-yl)-3-phenylpropyl)-1H-indole(4c)**: Purified by silica-gel

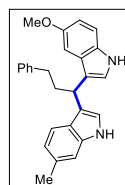

column chromatography (PE/EA=5/1). White solid. Yield: 58.8 mg, 50 %.  $^1\text{H}$  NMR (400 MHz, Chloroform- $d$ )  $\delta$  7.78 (s, 1H), 7.76 (s, 1H), 7.44 (d,  $J = 8.1$  Hz, 1H), 7.33 – 7.27 (m, 2H), 7.23 – 7.16 (m, 4H), 7.13 (s, 1H), 6.96 (d,  $J = 2.7$  Hz, 3H), 6.88 (d,  $J = 8.2$ , 1H), 6.83 (dd,  $J = 8.7, 2.5$  Hz, 1H), 4.43 (t,  $J = 7.3$  Hz, 1H), 3.77 (s, 3H), 2.76–2.74 (m, 2H), 2.62 – 2.47 (m, 2H), 2.45 (s, 3H).  $^{13}\text{C}$  NMR (100 MHz, Chloroform- $d$ )  $\delta$  153.7, 142.8, 137.3, 131.9, 131.7, 128.8, 128.4, 127.6, 125.8, 125.1, 122.5, 121.0, 120.9, 120.1, 119.8, 119.5, 111.9, 111.8, 111.2, 101.8, 56.0, 37.4, 34.5, 33.4, 21.8; **ESI-HRMS**:  $m/s$  calculated for  $\text{C}_{27}\text{H}_{26}\text{N}_2\text{O}[\text{M}-\text{H}]^-$ : 393.1972; found: 393.1972.

**5-methoxy-3-(1-(7-methyl-1H-indol-3-yl)-3-phenylpropyl)-1H-indole(4d)**: Purified by silica-gel

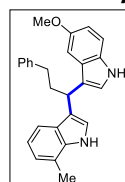

column chromatography (PE/EA=5/1). Pale yellow solid. Yield: 47.2 mg, 50 %.  $^1\text{H}$  NMR (400 MHz, Chloroform- $d$ )  $\delta$  7.84 (s, 1H), 7.76 (s, 1H), 7.47 – 7.39 (m, 1H), 7.33 – 7.26 (m, 3H), 7.23 – 7.16 (m, 4H), 7.02 (d,  $J = 2.4$  Hz, 1H), 7.00 – 6.94 (m, 4H), 6.83 (dd,  $J = 8.8, 2.5$  Hz, 1H), 4.45 (t,  $J = 7.4$  Hz, 1H), 3.77 (s, 3H), 2.80 – 2.70 (m, 2H), 2.63–2.50 (m, 2H), 2.47 (s, 3H).  $^{13}\text{C}$  NMR (100 MHz, Chloroform- $d$ )  $\delta$  153.7, 142.8, 136.4, 131.9, 128.8, 128.4, 127.6, 126.8, 125.8, 122.5, 121.4, 120.6, 120.4, 120.1, 119.4, 117.6, 111.9, 111.8, 101.8, 56.0, 37.4, 34.5, 33.5, 16.7. **ESI-HRMS**:  $m/s$  calculated for  $\text{C}_{27}\text{H}_{26}\text{N}_2\text{O}[\text{M}-\text{H}]^-$ : 393.1972; found: 393.1972.

**3-(1H-indol-3-yl)-3-phenylpropan-1-ol(5a)**<sup>[13]</sup>: Purified by silica-gel column chromatography

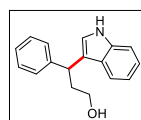

(PE/EA=3/1). White solid. Yield: 50.6 mg, 67 %.  $^1\text{H}$  NMR (400 MHz, Chloroform- $d$ )  $\delta$  8.00 (s, 1H), 7.44 (d,  $J = 8.0$  Hz, 1H), 7.33 – 7.28 (m, 3H), 7.28 – 7.23 (m, 2H), 7.19 – 7.09 (m, 2H), 7.04 – 6.96 (m, 2H), 4.37 (t,  $J = 7.7$  Hz, 1H), 3.70–3.61 (m, 2H), 2.50–2.41 (m, 1H), 2.33 – 2.21 (m, 1H), 1.40 (s, 1H).  $^{13}\text{C}$  NMR (100 MHz, Chloroform- $d$ )  $\delta$  144.9, 136.7, 128.6, 128.0, 127.0, 126.3, 122.2, 121.2, 119.8, 119.6, 119.4, 111.2, 61.5, 39.3, 38.8.

**3-(5-methyl-1H-indol-3-yl)-3-phenylpropan-1-ol(5b)**<sup>[14]</sup>: Purified by silica-gel column

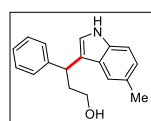

chromatography (PE/EA=3/1). Pale yellow solid. Yield: 53.5 mg, 67 %.  $^1\text{H}$  NMR (400 MHz, Chloroform- $d$ )  $\delta$  7.92 (s, 1H), 7.34 (d,  $J = 7.1$  Hz, 2H), 7.31 – 7.26 (m, 3H), 7.23–7.17 (m, 2H), 7.03 – 6.93 (m, 2H), 4.37 (t,  $J = 7.8$  Hz, 1H), 3.78 – 3.59 (m, 2H), 2.52 – 2.42 (m, 1H), 2.39 (s, 3H), 2.32–2.25 (m, 1H), 1.39 (s, 1H).  $^{13}\text{C}$  NMR (100 MHz, Chloroform- $d$ )  $\delta$

145.0, 135.0, 128.7, 128.6, 128.0, 127.3, 126.3, 123.9, 121.4, 119.3, 119.2, 110.9, 61.6, 39.3, 39.0, 21.7.

**3-(5-methoxy-1H-indol-3-yl)-3-phenylpropan-1-ol(5c)**<sup>[14]</sup>: Purified by silica-gel column

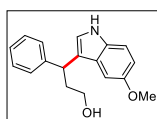

chromatography (PE/EA=3/1). Pale yellow solid. Yield: 58.2 mg, 69 %. <sup>1</sup>H NMR (400 MHz, Chloroform-*d*) δ 8.01 (s, 1H), 7.36 – 7.31 (m, 2H), 7.29 (d, *J* = 7.4 Hz, 2H), 7.23 – 7.13 (m, 2H), 7.01 (d, *J* = 2.4 Hz, 1H), 6.87 (d, *J* = 2.5 Hz, 1H), 6.82 (dd, *J* = 8.7, 2.5 Hz, 1H), 4.34 (t, *J* = 7.7 Hz, 1H), 3.75 (s, 3H), 3.69-3.65 (m, 2H), 2.49-2.41 (m, 1H), 2.35 – 2.19 (m, 1H). <sup>13</sup>C NMR (100 MHz, Chloroform-*d*) δ 153.7, 144.8, 131.8, 128.5, 128.0, 127.4, 126.3, 122.0, 119.3, 112.1, 111.9, 101.6, 61.4, 55.9, 39.3, 38.7.

**3-(5-fluoro-1H-indol-3-yl)-3-phenylpropan-1-ol(5d)**: Purified by silica-gel column chromatography

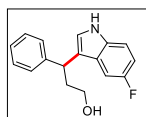

(PE/EA=3/1). Pale yellow solid. Yield: 58.3 mg, 72 %. <sup>1</sup>H NMR (400 MHz, Chloroform-*d*) δ 8.08 (s, 1H), 7.32-7.26 (m, 4H), 7.24-7.17 (m, 2H), 7.10-7.06 (m, 2H), 6.89 (t, *J* = 9.0 Hz, 1H), 4.32 (t, *J* = 7.8 Hz, 1H), 3.69-3.64 (m, 2H), 2.48-2.40 (m, 1H), 2.33 – 2.21 (m, 1H), 1.48 (s, 1H). <sup>13</sup>C NMR (100 MHz, Chloroform-*d*) δ 157.7 (d, *J*<sub>C-F</sub> = 234.3 Hz), 144.5, 133.2, 128.7, 127.9, 127.4 (d, *J*<sub>C-F</sub> = 9.8 Hz), 126.5, 123.0, 120.0 (d, *J*<sub>C-F</sub> = 4.7 Hz), 111.8 (d, *J*<sub>C-F</sub> = 9.8 Hz), 110.6 (d, *J*<sub>C-F</sub> = 26.5 Hz), 104.5 (d, *J*<sub>C-F</sub> = 23.5 Hz), 61.3, 39.3, 38.6. <sup>19</sup>F NMR (400 MHz, Chloroform-*d*) δ -124.52(m). **ESI-HRMS**: *m/z* calculated for C<sub>17</sub>H<sub>17</sub>FNO[M+H]<sup>+</sup>: 270.1289; found: 270.1289.

**3-(5-chloro-1H-indol-3-yl)-3-phenylpropan-1-ol(5e)**: Purified by silica-gel column chromatography

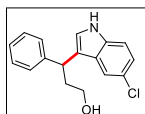

(PE/EA=3/1). Pale yellow solid. Yield: 52.7 mg, 61 %. <sup>1</sup>H NMR (400 MHz, Chloroform-*d*) δ 8.14 (s, 1H), 7.42 (d, *J* = 2.0 Hz, 1H), 7.35 – 7.27 (m, 4H), 7.22-7.18 (m, 2H), 7.09 (dd, *J* = 8.7, 2.0 Hz, 1H), 7.05 (d, *J* = 2.5 Hz, 1H), 4.32 (t, *J* = 8.0, 1H), 3.70-3.60 (m, 2H), 2.46-2.38 (m, 1H), 2.30-2.21(m, 1H), 1.57 (s, 1H). <sup>13</sup>C NMR (100 MHz, Chloroform-*d*) δ 144.4, 135.0, 128.7, 128.1, 127.9, 126.5, 125.1, 122.6, 122.5, 119.6, 119.0, 112.2, 61.3, 39.1, 38.7. **ESI-HRMS**: *m/z* calculated for C<sub>18</sub>H<sub>20</sub>NO[M+H]<sup>+</sup>: 286.0999; found: 286.0999.

**3-(5-bromo-1H-indol-3-yl)-3-phenylpropan-1-ol(5f)**<sup>[15]</sup>: Purified by silica-gel column

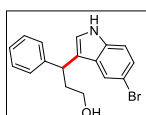

chromatography (PE/EA=3/1). White solid. Yield: 67.1 mg, 68 %. <sup>1</sup>H NMR (400 MHz, Chloroform-*d*) δ 8.11 (s, 1H), 7.58 (d, *J* = 1.8 Hz, 1H), 7.30 (s, 2H), 7.29 (d, *J* = 1.7 Hz, 2H), 7.24-7.17 (m, 3H), 7.04 (dd, *J* = 2.5, 0.9 Hz, 1H), 4.41 – 4.25 (m, 1H), 3.68-3.63 (m, 2H), 2.46-2.38 (m, 1H), 2.30-2.21 (m, 1H), 1.45 (s, 1H); <sup>13</sup>C NMR (100 MHz, Chloroform-*d*) δ 144.3, 135.2, 128.74, 128.7, 127.9, 126.5, 125.0, 122.5, 122.1, 119.5, 112.7, 61.3, 39.1, 38.7.

**3-(5-iodo-1H-indol-3-yl)-3-phenylpropan-1-ol(5g)**: Purified by silica-gel column chromatography

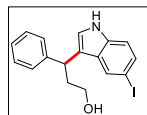

(PE/EA=3/1). Off-white solid. Yield: 83.8 mg, 74 %. <sup>1</sup>H NMR (400 MHz, Chloroform-*d*) δ 8.09 (s, 1H), 7.88 – 7.74 (m, 1H), 7.39 (dd, *J* = 8.5, 1.7 Hz, 1H), 7.33 – 7.27 (m, 4 H), 7.24 – 7.16 (m, 1H), 7.10 (d, *J* = 8.5 Hz, 1H), 7.00 (d, *J* = 2.5, 1H), 4.32 (t, *J* = 8.0 Hz 1H), 3.68-3.60 (m, 2H), 2.46-2.37 (m, 1H), 2.30-2.20 (m, 1H), 1.40 (s, 1H). <sup>13</sup>C NMR (100 MHz, Chloroform-*d*) δ 144.3, 135.7, 130.6, 129.6, 128.7, 128.4, 127.9, 126.5, 122.0, 119.3, 113.2, 83.0, 61.3, 39.0, 38.8; **ESI-HRMS**: *m/z* calculated for C<sub>17</sub>H<sub>17</sub>INO[M+H]<sup>+</sup>: 378.0355; found: 378.0349.

**3-(6-methyl-1H-indol-3-yl)-3-phenylpropan-1-ol(5i):** Purified by silica-gel column chromatography

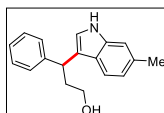

(PE/EA=3/1). White solid. Yield: 48.6 mg, 61 %.  $^1\text{H}$  NMR (400 MHz, Chloroform-*d*)  $\delta$  7.89 (s, 1H), 7.34-7.31 (m, 3H), 7.28 (d,  $J$  = 7.3 Hz, 1H), 7.25 (s, 1H), 7.20 – 7.13 (m, 1H), 7.12 (s, 1H), 7.02 – 6.93 (m, 1H), 6.85 (d,  $J$  = 8.1, 1H), 4.36 (t,  $J$  = 7.7 Hz, 1H), 3.72-3.63 (m, 2H), 2.54 – 2.36 (m, 4H), 2.34 – 2.20 (m, 1H), 1.39 (s, 1H).  $^{13}\text{C}$  NMR (100 MHz, Chloroform-*d*)  $\delta$  145.0, 137.2, 132.0, 128.5, 128.0, 126.2, 124.9, 121.2, 120.6, 119.6, 119.3, 111.2, 61.5, 39.5, 38.8, 21.8; **ESI-HRMS:**  $m/z$  calculated for  $\text{C}_{18}\text{H}_{20}\text{NO}[\text{M}+\text{H}]^+$ : 266.1545; found: 266.1539.

**3-(6-chloro-1H-indol-3-yl)-3-phenylpropan-1-ol(5j):** Purified by silica-gel column chromatography

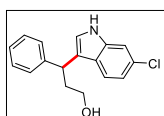

(PE/EA=3/1). Pale yellow solid. Yield: 63.7 mg, 74 %.  $^1\text{H}$  NMR (400 MHz, Chloroform-*d*)  $\delta$  8.14 (s, 1H), 7.36 – 7.29 (m, 5H), 7.28 (s, 1H), 7.25 – 7.17 (m, 1H), 7.04 (d,  $J$  = 4, 1H), 6.99 (dd,  $J$  = 8.5, 1.9 Hz, 1H), 4.49 – 4.25 (m, 1H), 3.69 (t,  $J$  = 5.9 Hz, 2H), 2.48-2.41 (m, 1H), 2.34 – 2.21 (m, 1H), 1.57 (s, 1H).  $^{13}\text{C}$  NMR (100 MHz, Chloroform-*d*)  $\delta$  144.5, 137.0, 128.6, 128.1, 127.9, 126.5, 125.6, 121.8, 120.5, 120.1, 112.0, 111.1, 61.3, 39.2, 38.6; **ESI-HRMS:**  $m/z$  calculated for  $\text{C}_{18}\text{H}_{20}\text{NO}[\text{M}+\text{H}]^+$ : 286.0999; found: 286.0993.

**3-(7-methyl-1H-indol-3-yl)-3-phenylpropan-1-ol(5k):** Purified by silica-gel column

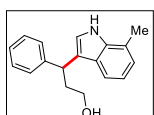

chromatography (PE/EA=3/1). White solid. Yield: 51 mg, 64 %.  $^1\text{H}$  NMR (400 MHz, Chloroform-*d*)  $\delta$  7.98 (s, 1H), 7.37 – 7.26 (m, 5H), 7.21 – 7.14 (m, 1H), 7.11 – 7.04 (m, 1H), 7.01 – 6.91 (m, 2H), 4.39 (t,  $J$  = 7.7 Hz, 1H), 3.74-3.66 (m, 2H), 2.54 – 2.38 (m, 4H), 2.37 – 2.22 (m, 1H), 1.56 (s, 1H);  $^{13}\text{C}$  NMR (100 MHz, Chloroform-*d*)  $\delta$  144.9, 136.2, 128.6, 128.0, 126.6, 126.3, 122.7, 120.9, 120.4, 120.3, 119.7, 117.4, 61.5, 39.5, 38.8, 16.7.

**3-(7-bromo-1H-indol-3-yl)-3-phenylpropan-1-ol(5l):** Purified by silica-gel column chromatography

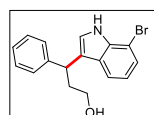

(PE/EA=3/1). White solid. Yield: 68.9 mg, 70 %.  $^1\text{H}$  NMR (400 MHz, Chloroform-*d*)  $\delta$  8.33 (s, 1H), 7.39 (d,  $J$  = 7.9 Hz, 1H), 7.34 – 7.26 (m, 5H), 7.23 – 7.15 (m, 1H), 7.09 (d,  $J$  = 2.5 Hz, 1H), 6.90 (t,  $J$  = 7.8 Hz, 1H), 4.39-4.36 (m, 1H), 3.69-3.61(m, 2H), 2.49-2.40 (m, 1H), 2.35 – 2.20 (m, 1H).  $^{13}\text{C}$  NMR (100 MHz, Chloroform-*d*)  $\delta$  144.4, 135.3, 128.6, 128.2, 127.9, 126.4, 124.5, 121.8, 121.0, 120.6, 118.9, 104.8, 61.2, 39.3, 38.6. **ESI-HRMS:**  $m/z$  calculated for  $\text{C}_{17}\text{H}_{17}\text{BrNO}[\text{M}+\text{H}]^+$ : 330.0494, 332.0473; found: 330.0488, 332.0473.

**3-(7-methoxy-1H-indol-3-yl)-3-phenylpropan-1-ol(5m):** Purified by silica-gel column

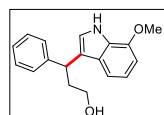

chromatography (PE/EA=3/1). White solid. Yield: 65.9 mg, 78 %.  $^1\text{H}$  NMR (400 MHz, Chloroform-*d*)  $\delta$  8.35 (s, 1H), 7.36 – 7.26 (m, 4H), 7.19 (d,  $J$  = 7.3 Hz, 1H), 7.09 (d,  $J$  = 8.0 Hz, 1H), 7.01 (d,  $J$  = 2.4 Hz, 1H), 6.96 (t,  $J$  = 7.9 Hz, 1H), 6.62 (d,  $J$  = 7.6 Hz, 1H), 4.38 (t,  $J$  = 7.7 Hz, 1H), 3.94 (s, 3H), 3.68 (d,  $J$  = 6.5 Hz, 2H), 2.51-2.43 (m, 1H), 2.35 – 2.22 (m, 1H), 1.57 (s, 1H).  $^{13}\text{C}$  NMR (100 MHz, Chloroform-*d*)  $\delta$  146.2, 145.0, 128.5, 128.4, 128.0, 127.2, 126.2, 120.9, 120.1, 119.8, 112.4, 102.0, 61.4, 55.4, 39.5, 38.8; **ESI-HRMS:**  $m/z$  calculated for  $\text{C}_{18}\text{H}_{20}\text{NO}_2[\text{M}+\text{H}]^+$ : 282.1494; found: 282.1489.

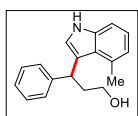

**3-(4-methyl-1H-indol-3-yl)-3-phenylpropan-1-ol(5n):** Purified by silica-gel column chromatography (PE/EA=3/1). Yellow solid. Yield: 26.1 mg, 33 %.  $^1\text{H}$  NMR (400 MHz, Chloroform-*d*)  $\delta$  8.10 (s, 1H), 7.30 – 7.26 (m, 1H), 7.25 (d,  $J$  = 1.8 Hz, 3H), 7.20-7.14 (m, 2H), 7.11 (d,  $J$  = 2.6 Hz, 1H), 7.04 (t,  $J$  = 7.6 Hz, 1H), 6.77 (d,  $J$  = 7.1 Hz, 1H), 4.73 (t,  $J$  = 7.6 Hz, 1H), 3.78-3.69 (m, 2H), 2.55 (s, 3H), 2.45 – 2.31 (m, 1H), 2.31 – 2.14 (m, 1H), 1.42 (s, 1H).  $^{13}\text{C}$  NMR

(100 MHz, Chloroform-*d*)  $\delta$  146.1, 137.0, 131.2, 128.5, 128.2, 126.1, 125.8, 122.3, 121.8, 121.4, 120.1, 109.1, 61.5, 40.9, 39.8, 21.0; **ESI-HRMS**:  $m/z$  calculated for C<sub>18</sub>H<sub>20</sub>NO[M+H]<sup>+</sup>: 266.1545; found: 266.1539.

**3-(2-methyl-1H-indol-3-yl)-3-phenylpropan-1-ol(5o)**: Purified by silica-gel column

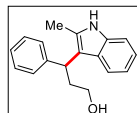

chromatography (PE/EA=3/1). Yellow oil. Yield: 58.2 mg, 73 %. <sup>1</sup>H NMR (400 MHz, Chloroform-*d*)  $\delta$  7.79 (s, 1H), 7.52 (dd,  $J$  = 8.0, 1.3 Hz, 1H), 7.37 (dd,  $J$  = 8.0, 1.4 Hz, 2H), 7.27 (d,  $J$  = 8.9 Hz, 2H), 7.25-7.24 (m, 1H), 7.16 (t,  $J$  = 7.3 Hz, 1H), 7.13 – 7.06 (m, 1H), 7.03-6.99 (m, 1H), 4.43 (t,  $J$  = 8.0 Hz, 1H), 3.69-3.63 (m, 1H), 3.61-3.55 (m, 1H), 2.57 – 2.48 (m, 2H), 2.37 (s, 3H), 1.42 – 1.34 (m, 1H). <sup>13</sup>C NMR (100 MHz, Chloroform-*d*)  $\delta$  145.1, 135.6, 131.8, 128.4, 127.9, 127.8, 125.9, 121.0, 119.4, 119.3, 113.5, 110.5, 61.78, 38.2, 37.0, 12.4; **ESI-HRMS**:  $m/z$  calculated for C<sub>18</sub>H<sub>20</sub>NO[M+H]<sup>+</sup>: 266.1545; found: 266.1539.

**3-(1H-indol-3-yl)-3-(p-tolyl)propan-1-ol(5q)**<sup>[14]</sup>: Purified by silica-gel column chromatography

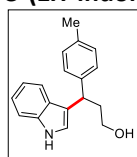

(PE/EA=3/1). White solid. Yield: 50.2 mg, 66 %. <sup>1</sup>H NMR (400 MHz, Chloroform-*d*)  $\delta$  8.01 (s, 1H), 7.48 (d,  $J$  = 7.9 Hz, 1H), 7.32 (d,  $J$  = 8.1 Hz, 1H), 7.25 – 7.20 (m, 2H), 7.16 (t,  $J$  = 7.6 Hz, 1H), 7.09 (d,  $J$  = 7.6 Hz, 2H), 7.06 – 6.99 (m, 2H), 4.36 (t,  $J$  = 7.8 Hz, 1H), 3.67 (d,  $J$  = 7.2 Hz, 2H), 2.51-2.42 (m, 1H), 2.31 (s, 4H), 1.41 (s, 1H). <sup>13</sup>C NMR (100 MHz, Chloroform-*d*)  $\delta$  141.8, 136.7, 135.7, 129.3, 127.8, 127.0, 122.2, 121.1, 120.0, 119.6, 119.4, 111.2, 61.6, 39.0, 38.9, 21.1.

**3-(4-fluorophenyl)-3-(1H-indol-3-yl)propan-1-ol(5r)**<sup>[14]</sup>: Purified by silica-gel column

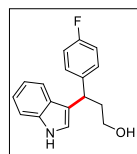

chromatography (PE/EA=3/1). White solid. Yield: 53.8 mg, 67 %. <sup>1</sup>H NMR (400 MHz, Chloroform-*d*)  $\delta$  8.04 (s, 1H), 7.42 (d,  $J$  = 8.0 Hz, 1H), 7.34 (d,  $J$  = 8.1 Hz, 1H), 7.31 – 7.26 (m, 2H), 7.17 (t,  $J$  = 7.6 Hz, 1H), 7.08 – 7.00 (m, 2H), 6.96 (t,  $J$  = 8.5 Hz, 2H), 4.40 (t,  $J$  = 7.7 Hz, 1H), 3.72-3.62 (m, 2H), 2.50-2.42 (m, 1H), 2.33 – 2.16 (m, 1H), 1.41 (s, 1H). <sup>19</sup>F NMR (400 MHz, Chloroform-*d*)  $\delta$  -117.25. <sup>13</sup>C NMR (100 MHz, Chloroform-*d*)  $\delta$  162.7, 160.3, 140.6 (d,  $J$ -F = 3.1 Hz), 136.8, 129.4 (d,  $J$ -F = 7.9 Hz), 126.9, 122.3, 121.2, 119.7, 119.6 (d,  $J$ -F = 1.9 Hz), 115.3 (d,  $J$ -F = 21.0 Hz), 111.3, 61.3, 38.9, 38.5.

**3-(4-chlorophenyl)-3-(1H-indol-3-yl)propan-1-ol(5s)**<sup>[14]</sup>: Purified by silica-gel column

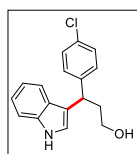

chromatography (PE/EA=3/1). White solid. Yield: 47 mg, 55 %. <sup>1</sup>H NMR (400 MHz, Chloroform-*d*)  $\delta$  7.97 (s, 1H), 7.32 (d,  $J$  = 8.0 Hz, 1H), 7.24 (d,  $J$  = 8.2 Hz, 1H), 7.17 (d,  $J$  = 1.1 Hz, 2H), 7.13 (s, 2H), 7.08 (t,  $J$  = 7.6 Hz, 1H), 6.98 – 6.87 (m, 2H), 4.30 (t,  $J$  = 7.7 Hz, 1H), 3.62-3.52 (m, 2H), 2.40-2.32 (m, 1H), 2.21 – 2.08 (m, 1H), 1.35 (s, 1H). <sup>13</sup>C NMR (100 MHz, Chloroform-*d*)  $\delta$  143.5, 136.7, 131.9, 129.4, 128.7, 126.8, 122.4, 121.2, 119.6, 119.5, 119.3, 111.3, 61.2, 38.6.

**3-(4-bromophenyl)-3-(1H-indol-3-yl)propan-1-ol(5t)**<sup>[14]</sup>: Purified by silica-gel column

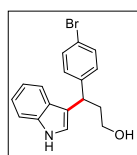

chromatography (PE/EA=3/1). White solid. Yield: 61.5 mg, 62 %. <sup>1</sup>H NMR (400 MHz, Chloroform-*d*)  $\delta$  8.03 (s, 1H), 7.42-7.37 (m, 3H), 7.34 (d,  $J$  = 8.2 Hz, 1H), 7.23 – 7.12 (m, 3H), 7.09 – 6.97 (m, 2H), 4.38 (t,  $J$  = 7.7 Hz, 1H), 3.70-3.63 (m, 2H), 2.54 – 2.38 (m, 1H), 2.28-2.19 (m, 1H), 1.32 (s, 1H). <sup>13</sup>C NMR (100 MHz, Chloroform-*d*)  $\delta$  144.0, 136.8, 131.7, 129.8, 126.9, 122.4, 121.2, 120.0, 119.7, 119.6, 119.3, 111.3, 61.2, 38.8, 38.6.

**3-(1*H*-indol-3-yl)-3-(4-(trifluoromethyl)phenyl)propan-1-ol(5u)**<sup>[14]</sup>: Purified by silica-gel column

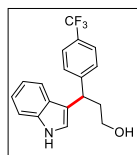

chromatography (PE/EA=3/1). White solid. Yield: 50 mg, 52 %. <sup>1</sup>H NMR (400 MHz, Chloroform-*d*) δ 8.10 (s, 1H), 7.52 (d, *J* = 8.1 Hz, 2H), 7.47 – 7.39 (m, 3H), 7.35 (d, *J* = 8.2, 1H), 7.26 (s, 1H), 7.20-7.16 (m, 1H), 7.09 (dd, *J* = 2.5, 0.8 Hz, 1H), 7.04 (d, *J* = 8.0, 1H), 4.49 (t, *J* = 7.7 Hz, 1H), 3.73-3.61 (m, 2H), 2.53-2.45 (m, 1H), 2.31-2.23 (m, 1H), 1.46 (s, 1H). <sup>19</sup>F NMR (400 MHz, Chloroform-*d*) δ -62.26. <sup>13</sup>C NMR (100 MHz, Chloroform-*d*) δ 149.2, 136.7, 128.7, 128.3, 126.8, 125.5 (q, *J*-*F* = 4.0 Hz), 122.5, 121.3, 119.7, 119.4, 118.8, 111.4, 61.0, 39.0, 38.5.

**3-(3-chlorophenyl)-3-(1*H*-indol-3-yl)propan-1-ol(5v)**<sup>[14]</sup>: Purified by silica-gel column

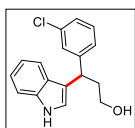

chromatography (PE/EA=3/1). White solid. Yield: 57.0 mg, 67 %. <sup>1</sup>H NMR (400 MHz, Chloroform-*d*) δ 8.09 (s, 1H), 7.45 (d, *J* = 8.0, 1H), 7.34 (d, *J* = 8.2, 1H), 7.30 (d, *J* = 1.9 Hz, 1H), 7.24 – 7.13 (m, 4H), 7.08 – 7.02 (m, 2H), 4.39 (t, *J* = 7.7 Hz, 1H), 3.70- 3.60 (m, 2H), 2.48-2.40 (m, 1H), 2.31 – 2.17 (m, 1H), 1.54 (s, 1H). <sup>13</sup>C NMR (100 MHz, Chloroform-*d*) δ 147.2, 136.7, 134.3, 129.8, 128.1, 126.9, 126.5, 126.3, 122.4, 121.3, 119.6, 119.4, 119.0, 111.3, 61.1, 38.9, 38.6.

**3-(2-chlorophenyl)-3-(1*H*-indol-3-yl)propan-1-ol(5w)**<sup>[14]</sup>: Purified by silica-gel column

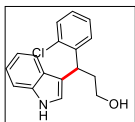

chromatography (PE/EA=3/1). White solid. Yield: 52.6 mg, 61 %. <sup>1</sup>H NMR (400 MHz, Chloroform-*d*) δ 8.07 (s, 1H), 7.47 (d, *J* = 8.0, 1H), 7.41 – 7.36 (m, 1H), 7.34 (d, *J* = 8.2, 1H), 7.25 – 7.21 (m, 1H), 7.19 – 7.07 (m, 4H), 7.05-7.01 (mz, 1H), 4.96 (t, *J* = 8.0, 1H), 3.74-3.69 (m, 2H), 2.52-2.44 (m, 1H), 2.30-2.21 (m, 1H), 1.52 (s, 1H). <sup>13</sup>C NMR (100 MHz, Chloroform-*d*) δ 142.4, 136.6, 133.7, 129.6, 129.2, 127.5, 127.2, 127.1, 122.4, 121.5, 119.7, 119.6, 118.9, 111.2, 61.4, 38.6, 35.1.

**3-(1*H*-indol-3-yl)-3-(naphthalen-2-yl)propan-1-ol(5x)**: Purified by silica-gel column

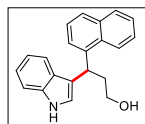

chromatography (PE/EA=3/1). White solid. Yield: 38.6 mg, 47 %. <sup>1</sup>H NMR (400 MHz, Chloroform-*d*) δ 8.43 – 8.22 (m, 1H), 7.99 (s, 1H), 7.91 – 7.80 (m, 1H), 7.73 (d, *J* = 8.0, 1H), 7.53 – 7.43 (m, 4H), 7.42 – 7.36 (m, 1H), 7.32 (d, *J* = 8.3, 1H), 7.18-7.14 (m, 1H), 7.03-6.99 (m, 1H), 6.98 (d, *J* = 2.5, 1H), 5.30 (t, *J* = 7.4 Hz, 1H), 3.80-3.69 (m, 2H), 2.30-2.52 (m, 1H), 2.49-2.41 (m, 1H), 1.47 (t, *J* = 4.1, 1H); <sup>13</sup>C NMR (100 MHz, Chloroform-*d*) δ 140.7, 136.6, 134.1, 131.9, 128.9, 127.1, 126.9, 126.0, 125.5, 125.4, 124.7, 123.5, 122.1, 122.0, 119.7, 119.5, 119.4, 111.1, 61.5, 38.9, 33.9. **ESI-HRMS**: *m/z* calculated for C<sub>21</sub>H<sub>20</sub>NO[M+H]<sup>+</sup>: 302.1545; found: 302.1539.

**3-(1*H*-indol-3-yl)-3-(4-methoxyphenyl)propan-1-ol(5y)**<sup>[14]</sup>: Purified by silica-gel column

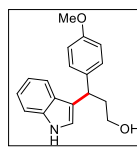

chromatography (PE/EA=3/1). White solid. Yield: 51.2 mg, 61 %. <sup>1</sup>H NMR (400 MHz, Chloroform-*d*) δ 8.05 (s, 1H), 7.46 (d, *J* = 8.0 Hz, 1H), 7.32 (d, *J* = 8.1 Hz, 1H), 7.25 – 7.21 (m, 2H), 7.20 – 7.11 (m, 1H), 7.07 – 6.98 (m, 2H), 6.86 – 6.76 (m, 2H), 4.35 (t, *J* = 7.7 Hz, 1H), 3.77 (s, 3H), 3.72-3.62 (m, 2H), 2.49-2.41 (m, 1H), 2.29-2.21 (m, 1H), 1.49 (s, 1H). <sup>13</sup>C NMR (100 MHz, Chloroform-*d*) δ 158.0, 137.0, 136.7, 128.9, 127.0, 122.1, 121.1, 120.1, 119.7, 119.4, 114.0, 111.2, 61.5, 55.3, 38.9, 38.5.

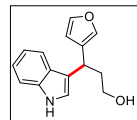

**3-(furan-3-yl)-3-(1*H*-indol-3-yl)propan-1-ol(5z)**: Purified by silica-gel column chromatography (PE/EA=3/1). Off-white solid. Yield: 41.4 mg, 61 %. <sup>1</sup>H NMR (400 MHz, Chloroform-*d*) δ 8.07 (s, 1H), 7.59 (d, *J* = 8.0, 1H), 7.38 – 7.29 (m, 2H), 7.21-7.17(m, 1H), 7.13 – 7.03 (m, 2H), 6.29 (dd, *J* = 3.2, 1.9 Hz, 1H), 6.10 (d, *J* = 3.2, 1H), 4.50 (t, *J* = 7.7

Hz, 1H), 3.69-3.66 (m, 2H), 2.52 – 2.22 (m, 2H), 1.51 (s, 1H). <sup>13</sup>C NMR (100 MHz, Chloroform-*d*) δ 157.9, 141.3, 136.6, 126.6, 122.2, 121.9, 119.5, 119.5, 116.9, 111.4, 110.2, 105.4, 61.2, 37.1, 33.2. **ESI-HRMS**:m/s calculated for C<sub>15</sub>H<sub>16</sub>NO<sub>2</sub>[M+H]<sup>+</sup>: 242.1176; found: 242.1176.

**3-(4-cyclopropylphenyl)-3-(1H-indol-3-yl)propan-1-ol(5aa)**: Purified by silica-gel column chromatography (PE/EA=3/1). White solid. Yield: 28.3 mg, 65 %. <sup>1</sup>H NMR (400 MHz, Chloroform-*d*) δ 7.92 (s, 1H), 7.39 (d, *J* = 8.0 Hz, 1H), 7.24 (d, *J* = 8.0 Hz, 1H), 7.12 (d, *J* = 8.0 Hz, 2H), 7.10 – 7.05 (m, 1H), 6.97 – 6.92 (m, 2H), 6.92 – 6.86 (m, 2H), 4.26 (t, *J* = 8 Hz, 1H), 3.63-3.54 (m, 2H), 2.41-2.32 (m, 1H), 2.27 – 2.09 (m, 1H), 1.79-1.72 (m, 1H), 1.26 (s, 1H), 0.90 – 0.79 (m, 2H), 0.63 – 0.49 (m, 2H). <sup>13</sup>C NMR (100 MHz, Chloroform-*d*) δ 141.9, 141.8, 136.7, 127.9, 127.0, 125.8, 122.2, 121.1, 120.1, 119.7, 119.4, 111.2, 61.6, 38.9, 38.8, 15.14. **ESI-HRMS**:m/s calculated for C<sub>20</sub>H<sub>22</sub>NO [M+H]<sup>+</sup>: 292.1696; found: 292.1696.

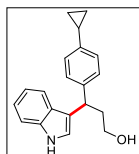

**1-(4-chlorophenyl)-3-(1H-indol-3-yl)propan-1-one(5ab)**: Purified by silica-gel column chromatography (PE/EA=3/1). Light pink solid. Yield: 26.4 mg, 31 %. <sup>1</sup>H NMR (400 MHz, Chloroform-*d*) δ 7.95 (s, 1H), 7.58 (d, *J* = 7.9 Hz, 1H), 7.40 – 7.28 (m, 5H), 7.23 – 7.17 (m, 1H), 7.12 (t, *J* = 7.4 Hz, 1H), 6.98 (d, *J* = 2.3 Hz, 1H), 4.74 (dd, *J* = 7.9, 5.2 Hz, 1H), 2.91-2.71 (m, 2H), 2.26 – 2.04 (m, 2H), 1.87 (s, 1H). <sup>13</sup>C NMR (100 MHz, Chloroform-*d*) δ 143.3, 136.5, 133.3, 128.7, 127.5, 122.2, 121.4, 119.4, 119.0, 115.9, 111.3, 73.6, 39.4, 21.5. **ESI-HRMS**: m/z calculated for C<sub>17</sub>H<sub>15</sub>ClNO[M-H]<sup>-</sup>: 284.0847, 286.0818; found: 284.0848, 286.0823.

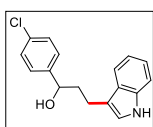

**3-(1H-indol-3-yl)-1-(p-tolyl)propan-1-one(5ac)**: Purified by silica-gel column chromatography (PE/EA=3/1). Pale yellow solid. Yield: 31.4 mg, 40 %. <sup>1</sup>H NMR (400 MHz, Chloroform-*d*) δ 7.96 (s, 1H), 7.62 (d, *J* = 7.8 Hz, 1H), 7.38 (d, *J* = 8.1 Hz, 1H), 7.30 (d, *J* = 8.4 Hz, 2H), 7.25 – 7.19 (m, 3H), 7.16-7.11 (m, 1H), 7.04 – 6.99 (m, 1H), 4.76 (dd, *J* = 7.8, 5.4 Hz, 1H), 3.27 – 2.75 (m, 2H), 2.39 (s, 3H), 2.35 – 2.01 (m, 2H), 1.79 (s, 1H). <sup>13</sup>C NMR (100 MHz, Chloroform-*d*) δ 141.8, 137.3, 136.4, 129.2, 127.5, 126.0, 122.0, 121.2, 119.2, 119.0, 116.1, 111.1, 74.1, 39.1, 21.5, 21.2.

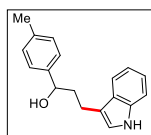

**3,3',3''-(3-phenylpropane-1,1,3-triyl)tris(1H-indole)(6a)<sup>[15]</sup>**: <sup>1</sup>H NMR (400 MHz, Chloroform-*d*) δ 7.86 (d, *J* = 7.7 Hz, 2H), 7.74 (s, 1H), 7.44 (d, *J* = 7.9 Hz, 1H), 7.34 (dd, *J* = 8.0, 3.5 Hz, 2H), 7.32 – 7.25 (m, 8H), 7.25 – 7.19 (m, 2H), 7.18-7.10 (m, 4H), 7.07 – 6.90 (m, 6H), 6.82 (d, *J* = 2.3 Hz, 1H), 4.45 (dd, *J* = 8.9, 6.0 Hz, 1H), 4.27 (dd, *J* = 8.9, 6.1 Hz, 1H), 3.11-3.04 (m, 1H), 2.95-2.88 (m, 1H). <sup>13</sup>C NMR (100 MHz, Chloroform-*d*) δ 145.2, 136.7, 136.6, 136.5, 128.3, 128.3, 127.2, 127.1, 126.9, 126.1, 121.9, 121.9, 121.8, 121.7, 121.6, 121.1, 120.7, 120.5, 112.0, 119.7, 119.6, 119.4, 119.1, 119.0, 111.0, 42.1, 40.7, 31.7.

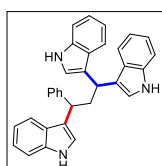

**Di-tert-butyl (3-(1H-indol-3-yl)-3-phenylpropyl)iminodicarbonate(6)**: Purified by silica-gel column chromatography (PE/EA=5/1). Off-white oil. Yield: 84.5 mg, 47 %. <sup>1</sup>H NMR (400 MHz, Chloroform-*d*) δ 7.98 (s, 1H), 7.33 (d, *J* = 8 Hz, 1H), 7.25-7.16 (m, 5H), 7.10 – 7.02 (m, 3H), 6.92 (t, *J* = 8 Hz, 1H), 4.13 (t, *J* = 8 Hz, 1H), 3.66-3.59 (m, 1H), 3.52-3.45 (m, 1H), 2.42-2.35 (m, 1H), 2.26-2.17 (m, 1H), 1.39 (s, 18H). <sup>13</sup>C NMR (100 MHz, Chloroform-*d*) δ 152.7, 144.8, 128.52, 127.9, 127.1, 126.3, 122.1, 119.6, 119.5, 119.4, 111.2, 82.3, 46.0, 41.1, 35.3,

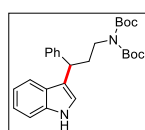

28.2.

**Tert-butyl(3-(1H-indol-3-yl)-3-phenylpropyl)(tosyloxy)carbamate(8)**<sup>[13]</sup>: Purified by silica-gel

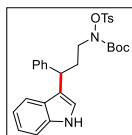

column chromatography (PE/EA=5/1). Off-white oil. Yield: 92.8 mg, 90 %. <sup>1</sup>H NMR (400 MHz, Chloroform-*d*)  $\delta$  8.16 (s, 1H), 7.90 – 7.76 (m, 2H), 7.42 (d, *J* = 8.0 Hz, 1H), 7.35 (d, *J* = 8.1 Hz, 1H), 7.30 (d, *J* = 1.9 Hz, 3H), 7.28-7.26 (m, 2H), 7.23 – 7.14 (m, 2H), 7.10 (d, *J* = 2.3 Hz, 1H), 7.10-7.05 (m, 1H), 4.18 (t, *J* = 7.6 Hz, 1H), 3.63 (d, *J* = 44.2 Hz, 2H), 2.44 (s, 5H), 1.25 (s, 9H).

**Tert-butyl 3'-phenylspiro[indole-3,2'-pyrrolidine]-1'-carboxylate(10)**<sup>[13]</sup>: Purified by silica-gel

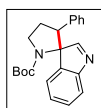

column chromatography (PE/EA=5/1). White solid. Yield: 49.2 mg, 75 %. <sup>1</sup>H NMR (400 MHz, Chloroform-*d*)  $\delta$  7.64 (s, 1H), 7.37 – 7.12 (m, 4H), 7.09-7.01 (m, 3H), 6.69 (d, *J* = 7.4 Hz, 2H), 4.03 (t, *J* = 9.5 Hz, 1H), 3.85 – 3.54 (m, 2H), 2.61-2.50 (m, 1H), 2.3-2.31 (m, 1H), 0.88 (s, 9H). <sup>13</sup>C NMR (100 MHz, Chloroform-*d*)  $\delta$  172.3, 154.8, 153.4, 140.5, 135.2, 128.8, 128.3, 127.9, 127.2, 126.7, 121.4, 120.9, 80.4, 79.0, 55.4, 47.0, 29.0, 27.7.

**3-(3-bromo-1-phenylpropyl)-1H-indole(11)**: Purified by silica-gel column chromatography (PE/EA=10/1). Pale yellow oil. Yield: 50 mg, 93 %. <sup>1</sup>H NMR (400 MHz, Chloroform-*d*)

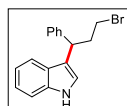

$\delta$  7.98 (s, 1H), 7.52 (d, *J* = 8.0 Hz, 1H), 7.42 – 7.31 (m, 5H), 7.27 – 7.18 (m, 2H), 7.14 – 7.02 (m, 2H), 4.52 (t, *J* = 7.6 Hz, 1H), 3.54 – 3.29 (m, 2H), 2.82-2.73 (m, 1H), 2.66 – 2.54 (m, 1H). <sup>13</sup>C NMR (100 MHz, Chloroform-*d*)  $\delta$  143.7, 136.7, 128.7, 128.0, 126.9, 126.6, 122.3, 121.3, 119.6, 119.6, 118.9, 111.3, 41.2, 38.8, 32.5. **ESI-HRMS**: *m/z* calculated for C<sub>17</sub>H<sub>17</sub>BrN[M+H]<sup>+</sup>: 314.0539, 316.0519; found: 314.0539, 316.0520.

**3-(1H-indol-3-yl)-3-phenylpropanal(N-N-D)**<sup>[5]</sup>: Purified by silica-gel column chromatography (PE/EA=5/1). Pale yellow oil. Yield: 263.5 mg, 18 %. <sup>1</sup>H NMR (400 MHz, Chloroform-*d*)

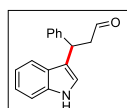

$\delta$  9.79 (t, *J* = 2.4 Hz, 1H), 8.09 (s, 1H), 7.43 (d, *J* = 8.0 Hz, 1H), 7.39 – 7.30 (m, 5H), 7.27 – 7.16 (m, 2H), 7.11 – 7.01 (m, 2H), 4.90 (t, *J* = 7.7 Hz, 1H), 3.22 (dd, *J* = 8.3, 2.7 Hz, 1H), 3.13 (dd, *J* = 16.5, 7.2 Hz, 1H). <sup>13</sup>C NMR (100 MHz, Chloroform-*d*)  $\delta$  201.9, 143.4, 136.7, 128.7, 127.7, 126.6, 126.5, 122.4, 121.7, 119.6, 119.4, 118.3, 49.8, 37.3.

**(E)-3-(p-tolyl)prop-2-en-1-ol(1b)**<sup>[1]</sup>: Purified by silica-gel column chromatography (PE/EA=3/1).

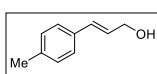

white solid. yield: 700 mg, 89 %; <sup>1</sup>H NMR (400 MHz, Chloroform-*d*)  $\delta$  7.29 (d, *J* = 8.0 Hz, 2H), 7.13 (d, *J* = 7.9 Hz, 2H), 6.58 (d, *J* = 16.0, 1H), 6.32 (dt, *J* = 16.0, 5.8 Hz, 1H), 4.30 (d, *J* = 5.6, 2H), 2.35 (s, 3H), 1.76 (s, 1H). <sup>13</sup>C NMR (100 MHz, Chloroform-*d*)  $\delta$  137.7, 134.0, 131.3, 129.4, 127.5, 126.5, 63.9, 21.3

**(E)-3-(4-methoxyphenyl)prop-2-en-1-ol (1c)**<sup>[1]</sup>: Purified by silica-gel column chromatography

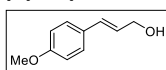

(PE/EA=1/1). white solid. yield: 400 mg, 55 %; <sup>1</sup>H NMR (400 MHz, Chloroform-*d*)  $\delta$  7.35 (d, *J* = 8.7 Hz, 2H), 6.88 (d, *J* = 8.7 Hz, 2H), 6.58 (d, *J* = 16.0 Hz, 1H), 6.26 (d, *J* = 16.0 Hz, 1H), 4.72 – 4.04 (m, 3H), 3.83 (s, 4H), 1.69 (s, 1H).

**(E)-3-(4-fluorophenyl)prop-2-en-1-ol(1d)**<sup>[2]</sup>: Purified by silica-gel column chromatography

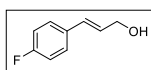

(PE/EA=3/1). white solid. yield: 700 mg, 75 %; <sup>1</sup>H NMR (400 MHz, Chloroform-*d*)  $\delta$  7.42 – 7.29 (m, 2H), 7.00 (t, *J* = 8.7 Hz, 2H), 6.58 (d, *J* = 15.9 Hz, 1H), 6.28 (dt, *J* = 15.9, 5.7 Hz, 1H), 4.31 (s, 2H), 1.63 (s, 1H). <sup>19</sup>F NMR (400 MHz, Chloroform-*d*)  $\delta$  -114.33. <sup>13</sup>C NMR (100 MHz, Chloroform-*d*)  $\delta$  162.4 (d, *J*<sub>C-F</sub> = 247.0 Hz), 132.8 (d, *J*<sub>C-F</sub> = 3.3 Hz), 130.0, 128.2 (d, *J*<sub>C-F</sub> =

2.3 Hz), 128.0 (d,  $J_{C-F}$  = 8.0 Hz), 115.5 (d,  $J_{C-F}$  = 21.6 Hz), 63.6.

**(E)-3-(4-chlorophenyl)prop-2-en-1-ol(1e)**<sup>[1]</sup>: Purified by silica-gel column chromatography (PE/EA=3/1). white solid. yiled: 1.28 g, 70 %; <sup>1</sup>H NMR (400 MHz, Chloroform-*d*)  $\delta$  7.33 – 7.26 (m, 4H), 6.56 (d,  $J$  = 15.9 Hz, 1H), 6.33 (dt,  $J$  = 15.9, 5.6 Hz, 1H), 4.31 (d,  $J$  = 5.6 Hz, 2H), 1.78 (s, 1H). <sup>13</sup>C NMR (100 MHz, Chloroform-*d*)  $\delta$  135.3, 133.4, 129.9, 129.3, 128.9, 127.8, 63.6.

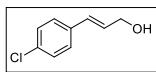

**(E)-3-(4-bromophenyl)prop-2-en-1-ol(1f)**<sup>[2]</sup>: Purified by silica-gel column chromatography (PE/EA=3/1). Pale yellow solid. yiled: 700 mg, 70 %; <sup>1</sup>H NMR (400 MHz, Chloroform-*d*)  $\delta$  7.43 (d,  $J$  = 8.5 Hz, 2H), 7.24 (d,  $J$  = 8.4 Hz, 2H), 6.55 (d,  $J$  = 15.9 Hz, 1H), 6.34 (dt,  $J$  = 15.9, 5.6 Hz, 1H), 4.31 (dd,  $J$  = 5.5, 1.6 Hz, 2H), 1.73 (s, 1H). <sup>13</sup>C NMR (100 MHz, Chloroform-*d*)  $\delta$  135.6, 131.7, 129.8, 129.3, 128.0, 121.5, 63.5.

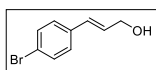

**(E)-3-(4-(trifluoromethyl)phenyl)prop-2-en-1-ol(1g)**<sup>[1]</sup>: Purified by silica-gel column chromatography (PE/EA=3/1). White solid. yiled: 1.57 g, 77 %; <sup>1</sup>H NMR (400 MHz, Chloroform-*d*)  $\delta$  7.53 (d,  $J$  = 8.1 Hz, 2H), 7.42 (d,  $J$  = 8.1 Hz, 2H), 6.70 – 6.59 (d,  $J$  = 15.9, 1H), 6.43 (dt,  $J$  = 15.9, 5.3 Hz, 1H), 4.34 (dd,  $J$  = 5.4, 1.7 Hz, 2H), 2.49 (s, 1H). <sup>19</sup>F NMR (400 MHz, Chloroform-*d*)  $\delta$  -62.51. <sup>13</sup>C NMR (100 MHz, Chloroform-*d*)  $\delta$  140.3, 131.4, 129.7, 129.4, 126.7, 125.7 (q,  $J_{C-F}$  = 3.9 Hz), 123.0, 63.4.

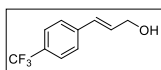

**(E)-3-(3-chlorophenyl)prop-2-en-1-ol(1h)**<sup>[2]</sup>: Purified by silica-gel column chromatography (PE/EA=3/1). Pale yellow liquid. yiled: 365 mg, 36 %; <sup>1</sup>H NMR (400 MHz, Chloroform-*d*)  $\delta$  7.35 (s, 1H), 7.22 (h,  $J$  = 4.1 Hz, 3H), 6.54 (d,  $J$  = 15.9 Hz, 1H), 6.35 (dt,  $J$  = 15.9, 5.5 Hz, 1H), 4.31 (dd,  $J$  = 5.5, 1.6 Hz, 2H), 2.06 (s, 1H). <sup>13</sup>C NMR (100 MHz, Chloroform-*d*)  $\delta$  138.7, 134.6, 130.2, 129.9, 129.5, 127.7, 126.5, 124.7, 63.4.

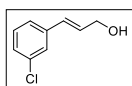

**(E)-3-(2-chlorophenyl)prop-2-en-1-ol(1i)**<sup>[1]</sup>: Purified by silica-gel column chromatography (PE/EA=3/1). Off-white liquid. yiled: 1.15 g, 68 %; <sup>1</sup>H NMR (400 MHz, Chloroform-*d*)  $\delta$  7.50 (dd,  $J$  = 7.5, 2.0 Hz, 1H), 7.33 (dd,  $J$  = 7.5, 1.8 Hz, 1H), 7.18 (pd,  $J$  = 7.3, 1.7 Hz, 2H), 6.99 (d,  $J$  = 15.9 Hz, 1H), 6.33 (dt,  $J$  = 15.9, 5.6 Hz, 1H), 4.34 (dd,  $J$  = 5.6, 1.7 Hz, 2H), 2.52 (s, 1H).

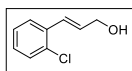

**(E)-2-methyl-3-phenylprop-2-en-1-ol(1j)**<sup>[2]</sup>: Purified by silica-gel column chromatography (PE/EA=3/1). Pale yellow oil. yiled: 1.4 g, 88 %; <sup>1</sup>H NMR (400 MHz, Chloroform-*d*)  $\delta$  7.23 (t,  $J$  = 7.5 Hz, 2H), 7.18 (d,  $J$  = 6.8 Hz, 2H), 7.13 (d,  $J$  = 7.9 Hz, 1H), 6.42 (d,  $J$  = 2.4 Hz, 1H), 4.07 (s, 2H), 2.37 – 2.09 (m, 1H), 1.79 (s, 3H). <sup>13</sup>C NMR (100 MHz, Chloroform-*d*)  $\delta$  137.7, 137.7, 128.9, 128.2, 126.5, 125.0, 68.9, 15.3.

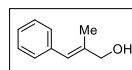

**(E)-3-(naphthalen-1-yl)prop-2-en-1-ol(1k)**<sup>[1]</sup>: Purified by silica-gel column chromatography (PE/EA=3/1). White solid. yiled: 320 mg, 64 %; <sup>1</sup>H NMR (400 MHz, Chloroform-*d*)  $\delta$  8.22 – 8.10 (m, 1H), 7.93 – 7.84 (m, 1H), 7.79 (d,  $J$  = 8.2 Hz, 1H), 7.60 (d,  $J$  = 7.1 Hz, 1H), 7.55 – 7.49 (m, 2H), 7.49 – 7.43 (m, 1H), 7.39 (d,  $J$  = 15.9 Hz, 1H), 6.40 (dt,  $J$  = 15.6, 5.6 Hz, 1H), 4.44 (d,  $J$  = 4.2 Hz, 2H), 1.85 (s, 1H). <sup>13</sup>C NMR (100 MHz, Chloroform-*d*)  $\delta$  134.6, 133.7, 131.9, 131.3, 128.7, 128.3, 128.2, 126.2, 125.9, 125.7, 124.0, 123.9, 64.0.

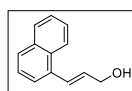



**(E)-3-(furan-3-yl)prop-2-en-1-ol(1l)**<sup>[2]</sup>: Purified by silica-gel column chromatography (PE/EA=5/1).

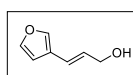

Yellow liquid. Yield: 1.2 g, 59 %; <sup>1</sup>H NMR (400 MHz, Chloroform-*d*) δ 7.33 (d, *J* = 1.8 Hz, 1H), 6.42 (dt, *J* = 15.9, 1.6 Hz, 1H), 6.35 (dd, *J* = 3.4, 1.8 Hz, 1H), 6.27 (dt, *J* = 15.9, 5.6 Hz, 1H), 6.22 (d, *J* = 3.3 Hz, 1H), 4.26 (dd, *J* = 5.5, 1.6 Hz, 2H), 2.36 (s, 1H). <sup>13</sup>C NMR (100 MHz, Chloroform-*d*) δ 152.4, 142.0, 127.3, 119.2, 111.3, 108.0, 63.1.

**(E)-3-(4-cyclopropylphenyl)prop-2-en-1-ol(1m)**<sup>[1]</sup>: Purified by silica-gel column chromatography

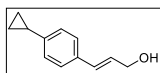

(PE/EA=5/1). White solid. Yield: 180 mg, 68 %. <sup>1</sup>H NMR (400 MHz, Chloroform-*d*) δ 7.35 – 7.21 (m, 2H), 7.01 (d, *J* = 1.8 Hz, 2H), 6.66 – 6.48 (m, 1H), 6.30 (dt, *J* = 15.8, 5.8 Hz, 1H), 4.30 (d, *J* = 5.8 Hz, 2H), 1.92–1.85 (m, 1H), 1.61 (s, 1H), 1.00 – 0.93 (m, 2H), 0.83 – 0.60 (m, 2H). <sup>13</sup>C NMR (100 MHz, Chloroform-*d*) δ 143.8, 133.9, 131.2, 127.4, 126.4, 125.8, 63.9, 15.3, 9.4.

**(E)-4-(4-bromophenyl)but-3-en-2-ol(1n)**<sup>[17]</sup>: Purified by silica-gel column chromatography

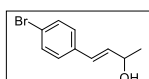

(PE/EA=3/1). Yellow solid. Yield: 640 mg, 60 %. <sup>1</sup>H NMR (400 MHz, Chloroform-*d*) δ 7.50 – 7.40 (m, 2H), 7.33 – 7.14 (m, 2H), 6.53 (d, *J* = 15.9 Hz, 1H), 6.29 (d, *J* = 6.2 Hz, 1H), 4.50 (td, *J* = 6.3, 1.3 Hz, 1H), 1.83 (s, 1H), 1.39 (d, *J* = 6.4 Hz, 3H). <sup>13</sup>C NMR (100 MHz, Chloroform-*d*) δ 135.7, 134.3, 131.7, 128.2, 128.0, 121.4, 68.8, 23.4.

**(E)-1,3-diphenylprop-2-en-1-ol(1o)**<sup>[3]</sup>: Purified by silica-gel column chromatography (PE/EA=5/1).

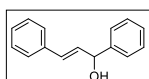

yellow oil. Yield: 950 mg, 94 %. <sup>1</sup>H NMR (400 MHz, Chloroform-*d*) δ 7.47 – 7.43 (m, 2H), 7.42 – 7.36 (m, 4H), 7.35 – 7.29 (m, 3H), 7.28 – 7.23 (m, 1H), 6.70 (dd, *J* = 15.9, 1.2 Hz, 1H), 6.40 (dd, *J* = 15.9, 6.5 Hz, 1H), 5.39 (dd, *J* = 6.7, 3.0 Hz, 1H), 2.24 (d, *J* = 3.5 Hz, 1H). <sup>13</sup>C NMR (100 MHz, Chloroform-*d*) δ 142.9, 136.6, 131.6, 130.7, 128.8, 128.7, 127.9, 126.7, 126.5, 75.2.

## 8. References

1. H. Li, H. C. Li, Y. Zhou, J. Huang, J. Yi, H. Zhao, W. Wang and L. Jing, *Chem. Asian J.* 2020, **15**, 555–559.
2. J. Liao, W. Guo, Z. Zhang, X. Tang, W. Wu and H. Jiang, *J. Org. Chem.* 2016, **81**, 1304–1309.
3. H. X. Zheng, Z. F. Xiao, C. Z. Yao, Q. Q. Li, X. S. Ning, Y. B. Kang and Y. Tang, *Org. Lett.* 2015, **17**, 6102–6105.
4. D. Patra, S. Panja and A. Saha, *Eur. J. Org. Chem.* 2020, **7**, 878–883.
5. Z. H. Shi, H. Sheng, K. F. Yang, J. X. Jiang, G. Q. Lai, Y. Lu and L. W. Xu, *Eur. J. Org. Chem.* 2011, **1**, 66–70.
6. Gaussian 09, Revision D.01, M. J. Frisch, G. W. Trucks, H. B. Schlegel, G. E. Scuseria, M. A. Robb, J. R. Cheeseman, G. Scalmani, V. Barone, B. Mennucci, G. A. Petersson, H. Nakatsuji, M. Caricato, X. Li, H. P. Hratchian, A. F. Izmaylov, J. Bloino, G. Zheng, J. L. Sonnenberg, M. Hada, M. Ehara, K. Toyota, R. Fukuda, J. Hasegawa, M. Ishida, T. Nakajima, Y. Honda, O. Kitao, H. Nakai, T. Vreven, J. A. Montgomery, Jr., J. E. Peralta, F. Ogliaro, M. Bearpark, J. J. Heyd, E. Brothers, K. N. Kudin, V. N. Staroverov, T. Keith, R. Kobayashi, J. Normand, K. Raghavachari, A. Rendell, J. C. Burant, S. S. Iyengar, J. Tomasi, M. Cossi, N. Rega, J. M. Millam, M. Klene, J. E. Knox, J. B. Cross, V. Bakken, C. Adamo, J. Jaramillo, R. Gomperts, R. E. Stratmann, O. Yazyev, A. J. Austin, R. Cammi, C. Pomelli, J. W. Ochterski, R. L. Martin, K. Morokuma, V. G. Zakrzewski, G. A. Voth, P. Salvador, J. J. Dannenberg, S. Dapprich, A. D. Daniels, O. Farkas, J. B. Foresman, J. V. Ortiz, J. Cioslowski, and D.

- J. Fox, Gaussian, Inc., Wallingford CT, 2013.
7. Humphrey, W., Dalke, A. and Schulten, K., 'VMD - Visual Molecular Dynamics', *J. Molec. Graphics*, 1996, 14.1, 33-38.
  8. X. Chen, Y. Liu, H. Jin and B. Zhou, *Synthesis*, 2022, **54**, 1347–1352.
  9. E. M. Galathri, L. D. Terlizzi, M. Fagnoni, S. Protti and C. G. Kokotos, *Org. Biomol. Chem.*, 2023, **21**, 365–369.
  10. H. X. Zheng, C. Z. Yao, J. P. Qu and Y. B. Kang, *Org. Chem. Front.*, 2018, **5**, 1213–1216.
  11. M. Sai, *Eur. J. Org. Chem.* 2022, **10**, e202200052.
  12. L. Yuan, A. Palmieri and M. Petrini, *Adv. Synth. Catal.* 2020, **362**, 1509–1513.
  13. X. Ma, J. J. Farndon, T. A. Young, N. Fey and J. F. Bower, *Angew. Chem. Int. Ed.* 2017, **56**, 14531–14535.
  14. Z. J. Wang, J. G. Yang, J. Jin, X. Lv and W. Bao, *Synthesis*, 2009, **23**, 3994–4000.
  15. Z. H. Shi, H. Sheng, K. F. Yang, J. X. Jiang, G. Q. Lai, Y. Lu and L. W. Xu, *Eur. J. Org. Chem.* 2011, **1**, 66–70.
  16. M. Shi, S. C. Cui and Q. J. Li, *Tetrahedron*, 2004, **60**, 6679–6684.
  17. A. K. Maity, P. N. Chatterjee, S. Roy, *Tetrahedron*, 2013, **69**, 942-956.

## 9. $^1\text{H}$ and $^{13}\text{C}$ NMR spectra of all products

### $^1\text{H}$ NMR of 3a

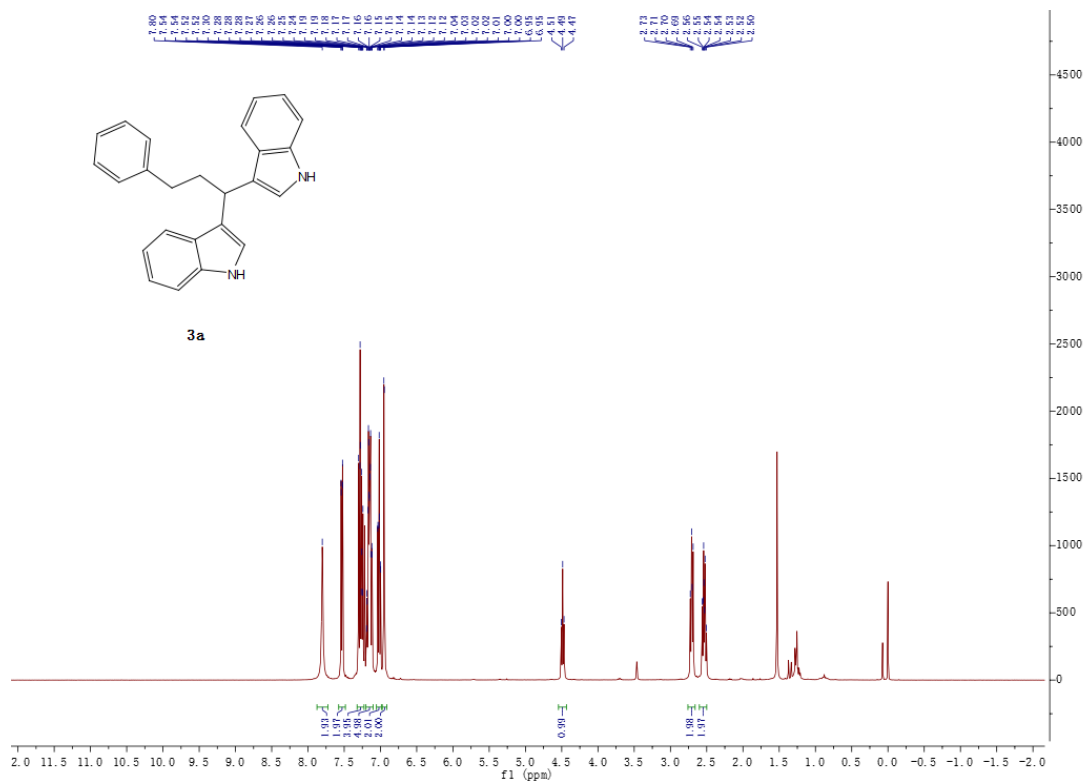

### $^{13}\text{C}$ NMR of 3a

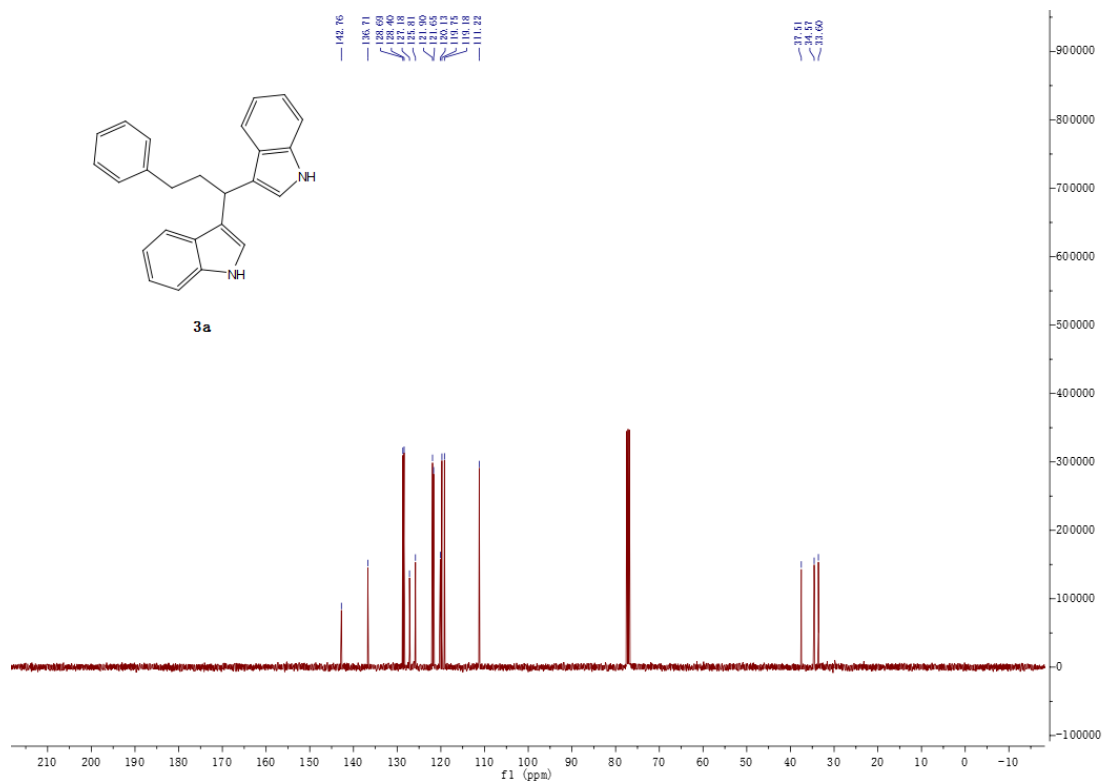

### <sup>1</sup>H NMR of 3b

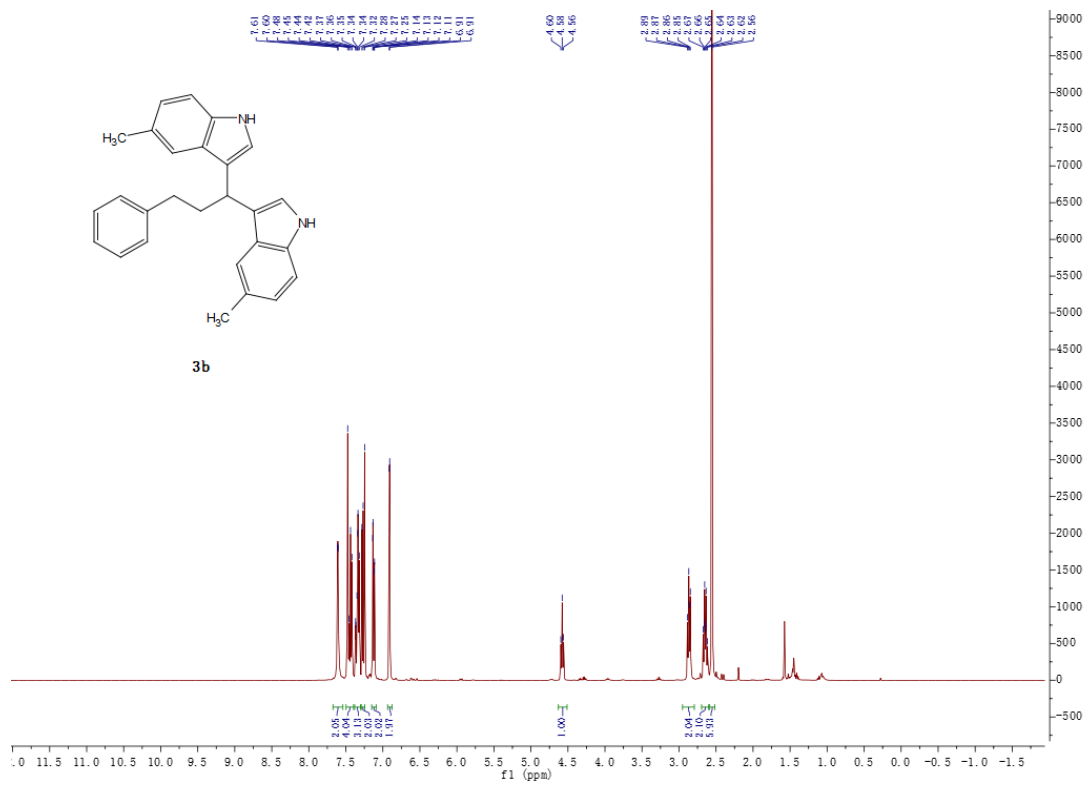

### <sup>13</sup>C NMR of 3b

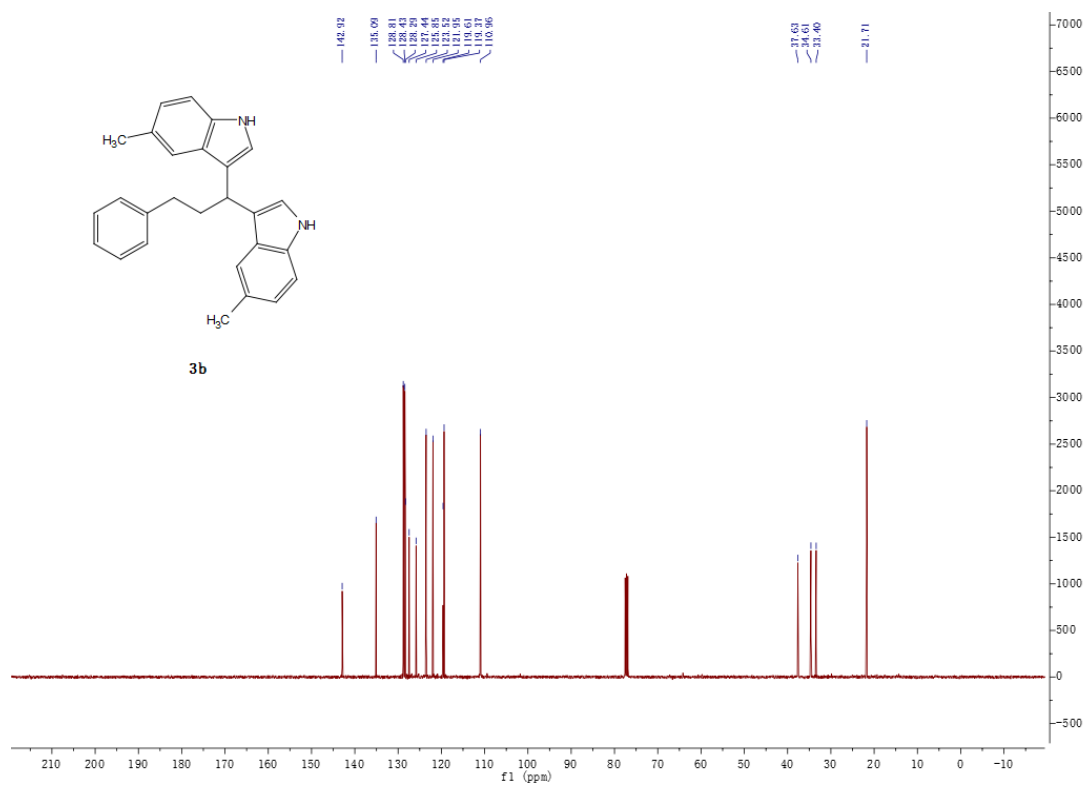

### <sup>1</sup>H NMR of 3c

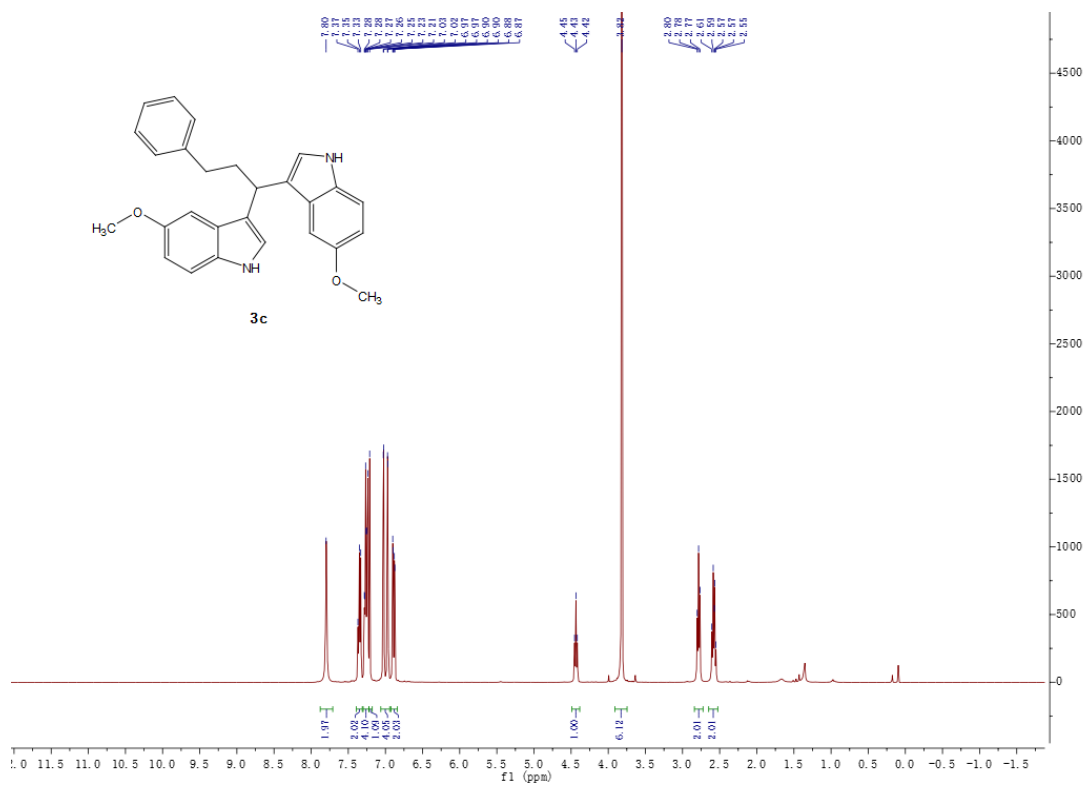

### <sup>13</sup>C NMR of 3c

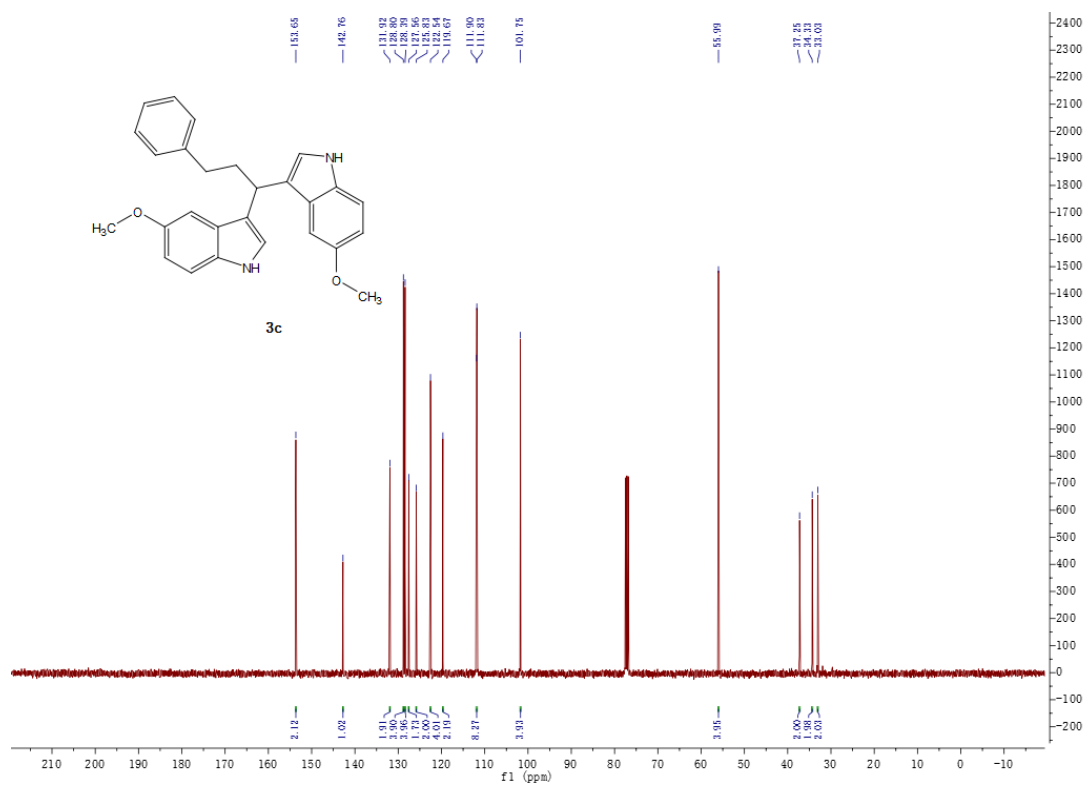

### <sup>1</sup>H NMR of 3d

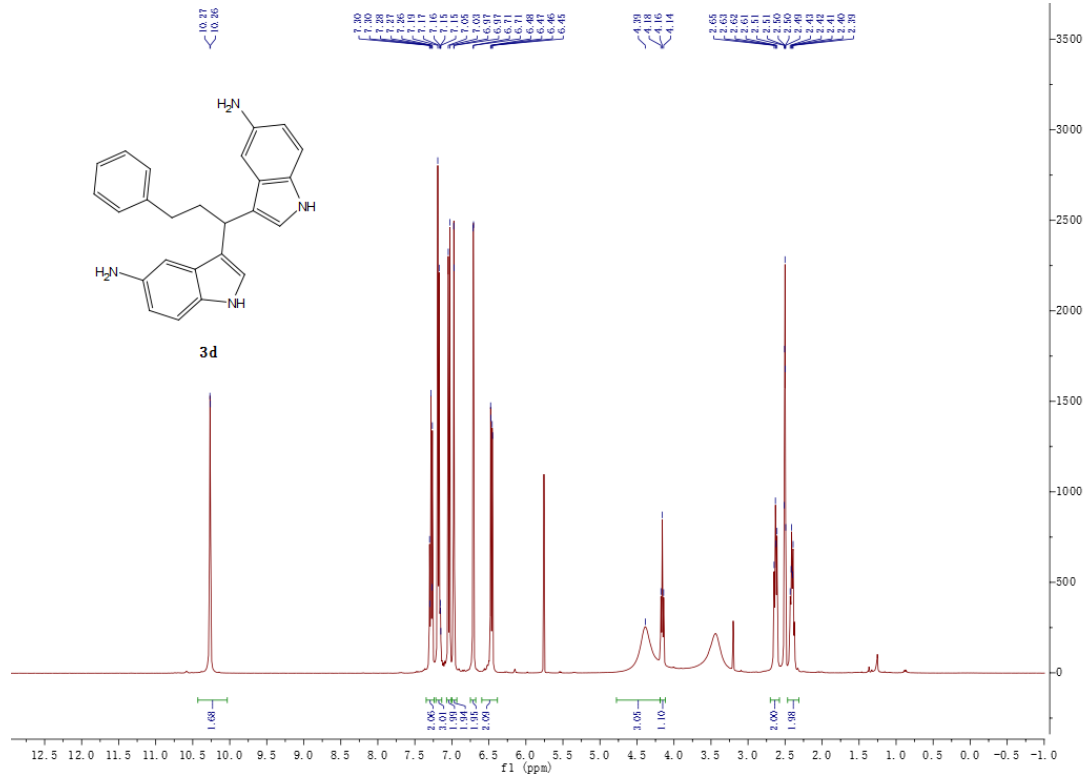

### <sup>13</sup>C NMR of 3d

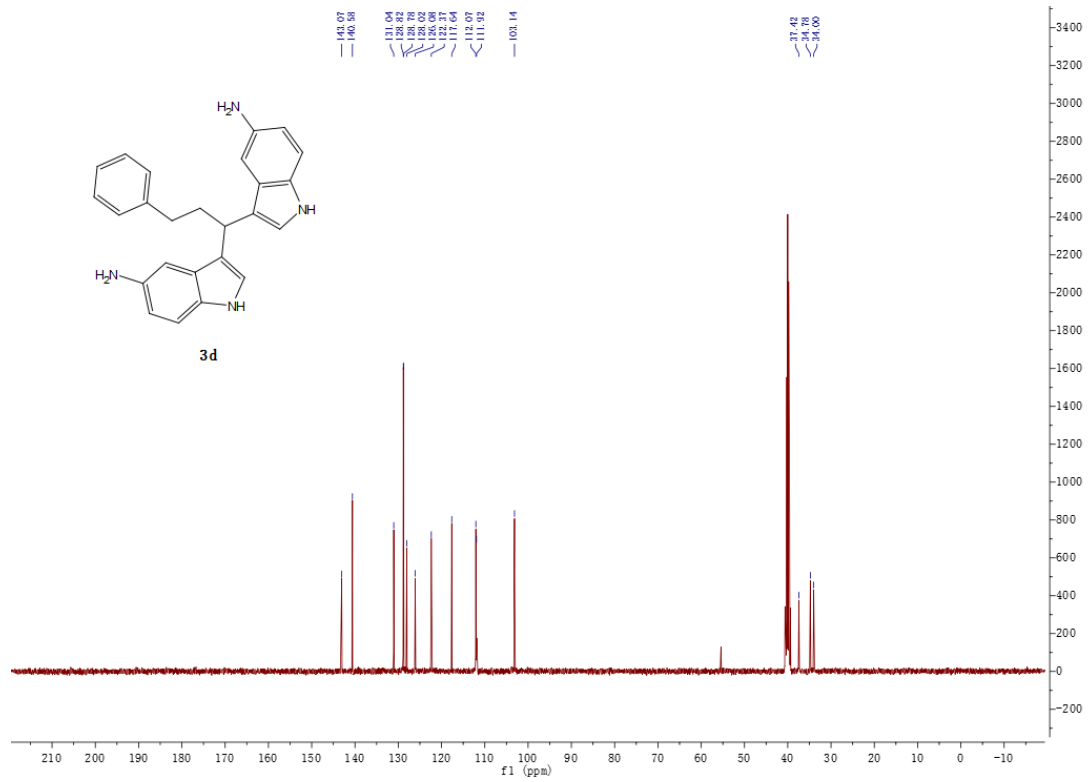

### <sup>1</sup>H NMR of 3e

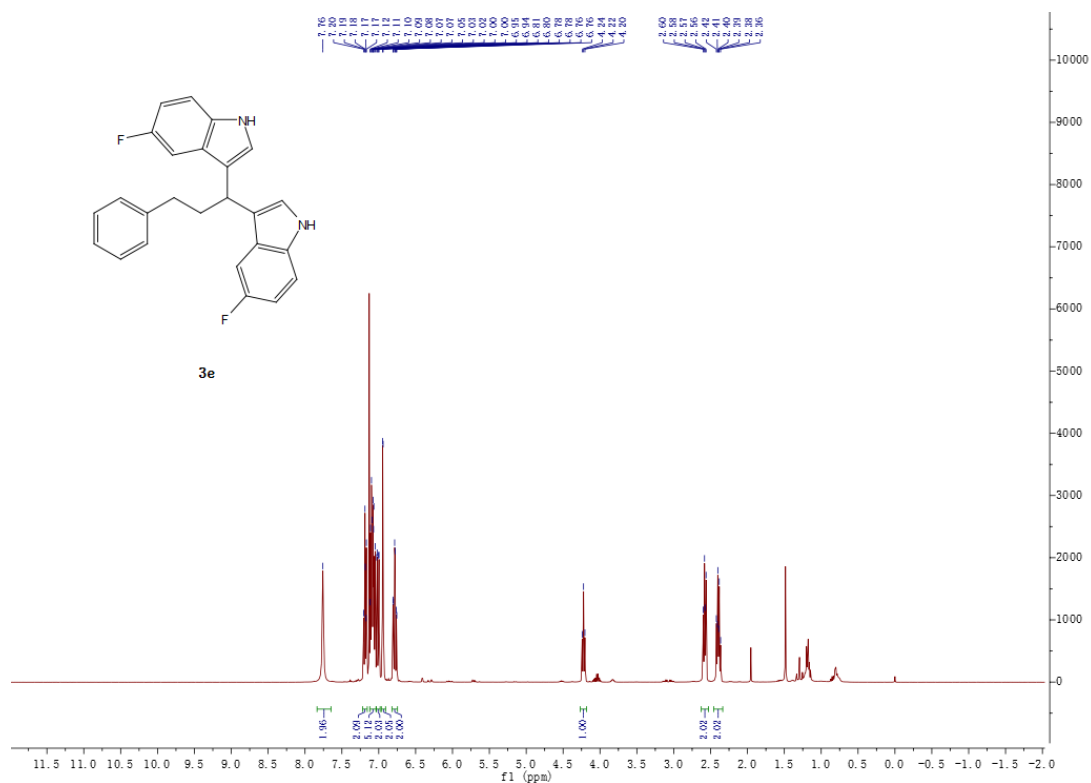

### <sup>13</sup>C NMR of 3e

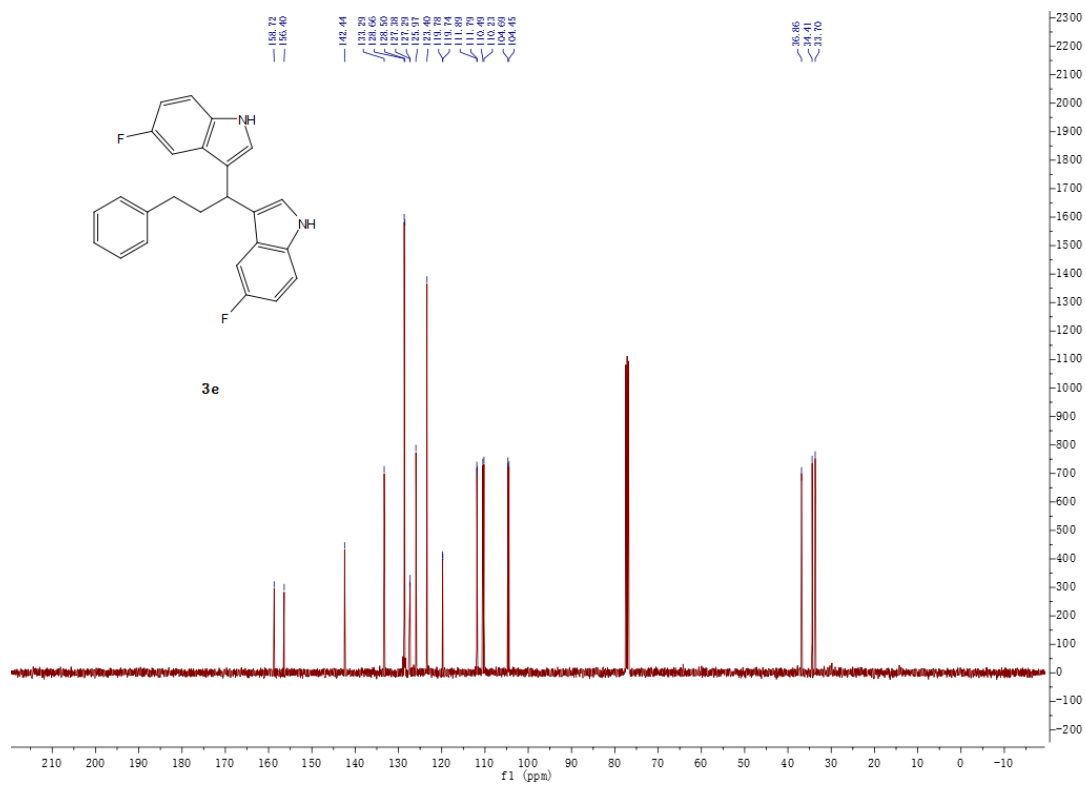

### <sup>1</sup>H NMR of 3f

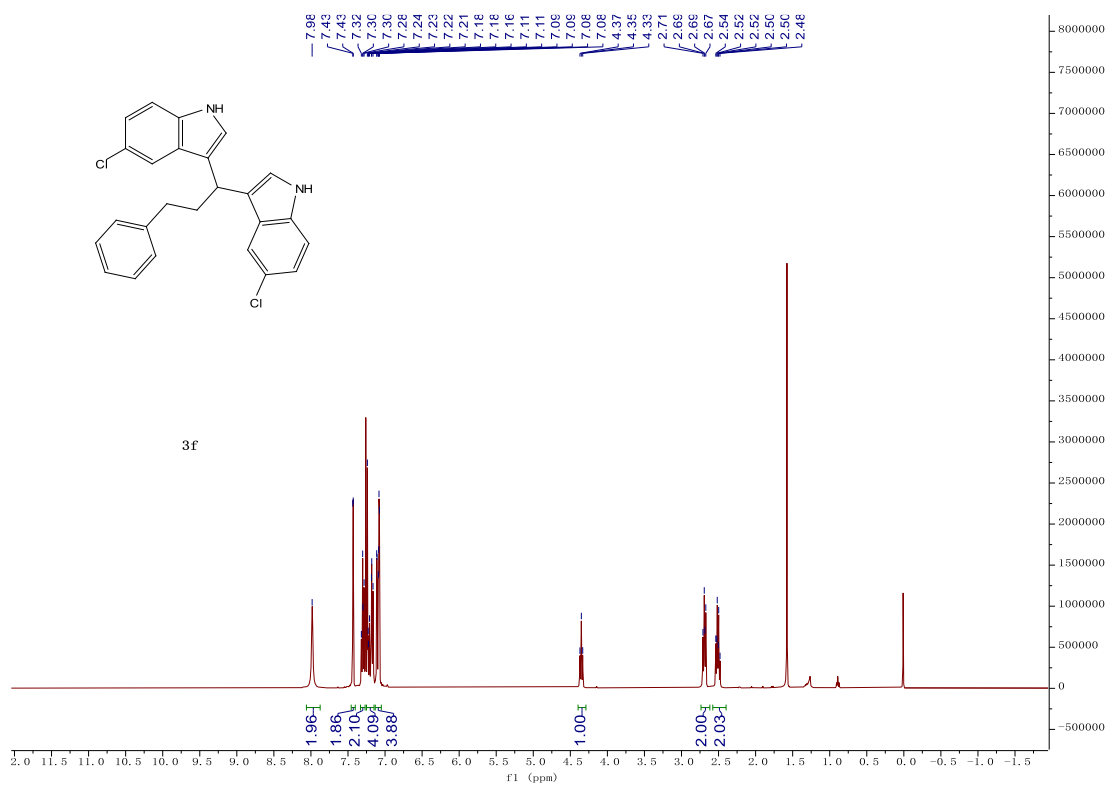

### <sup>13</sup>C NMR of 3f

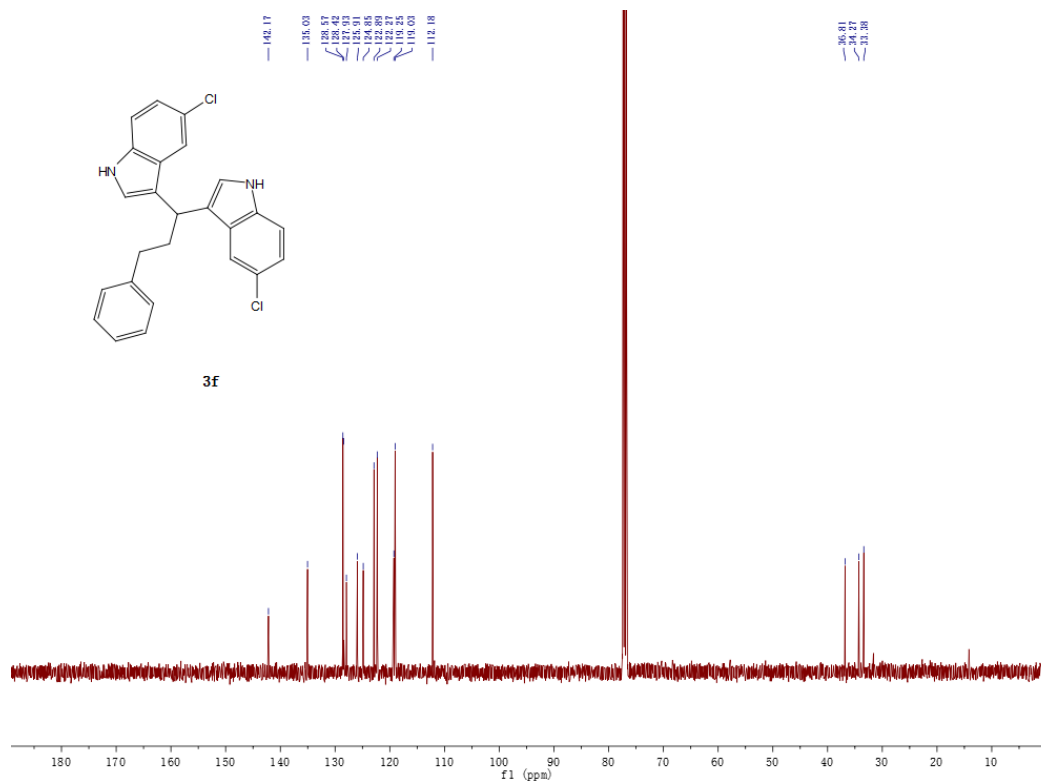



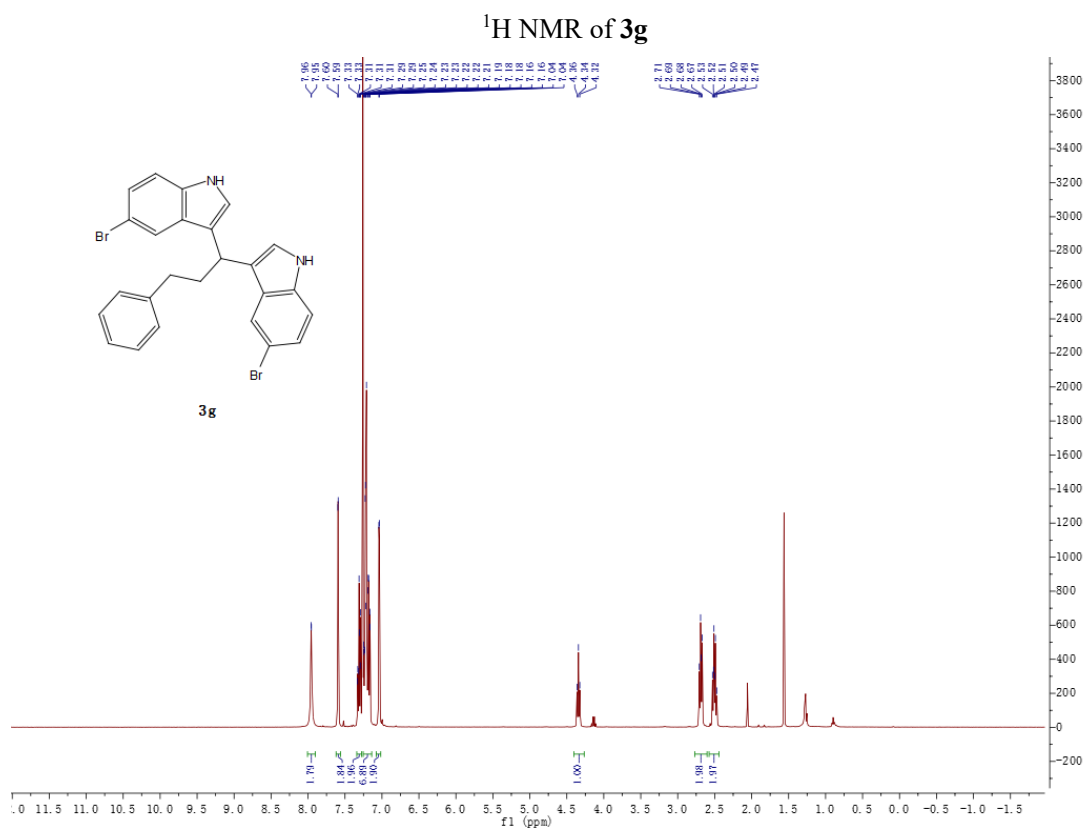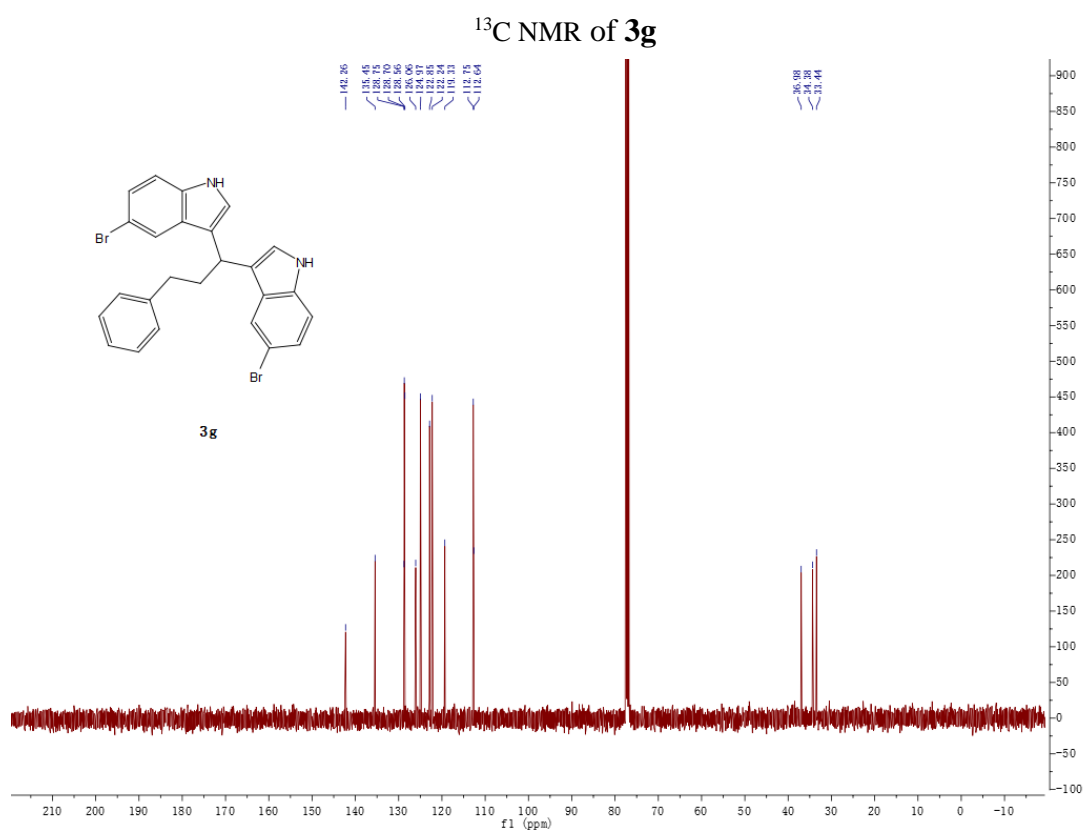

### <sup>1</sup>H NMR of 3h

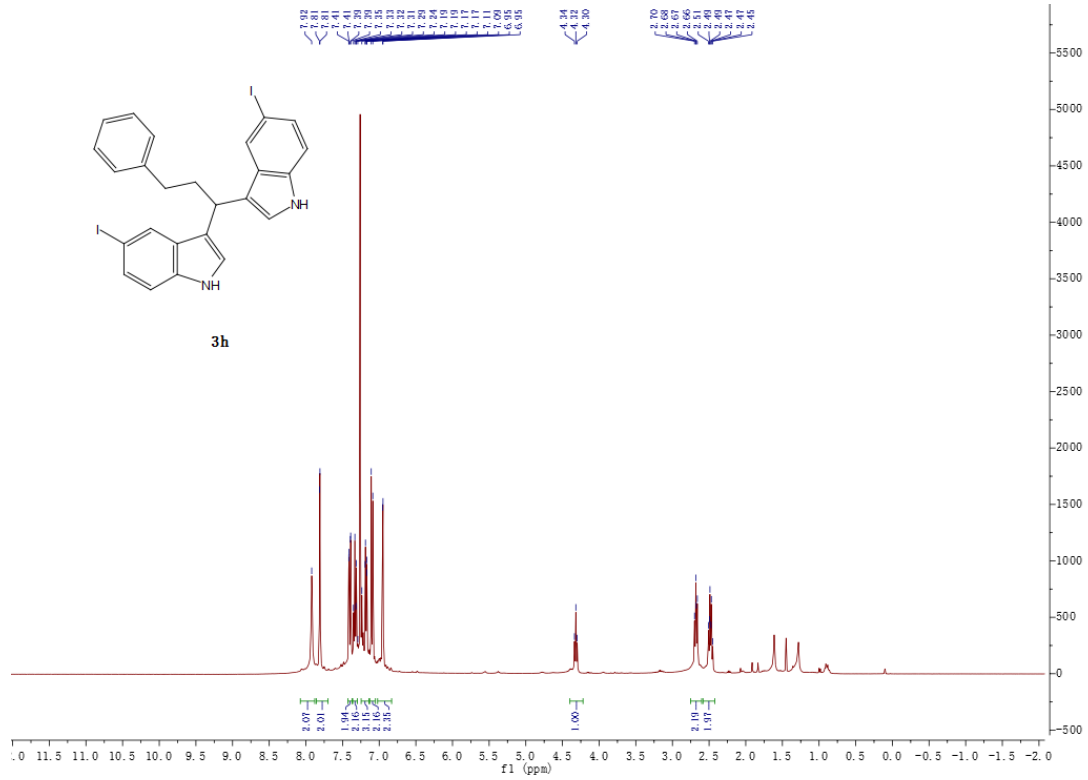

### <sup>13</sup>C NMR of 3h

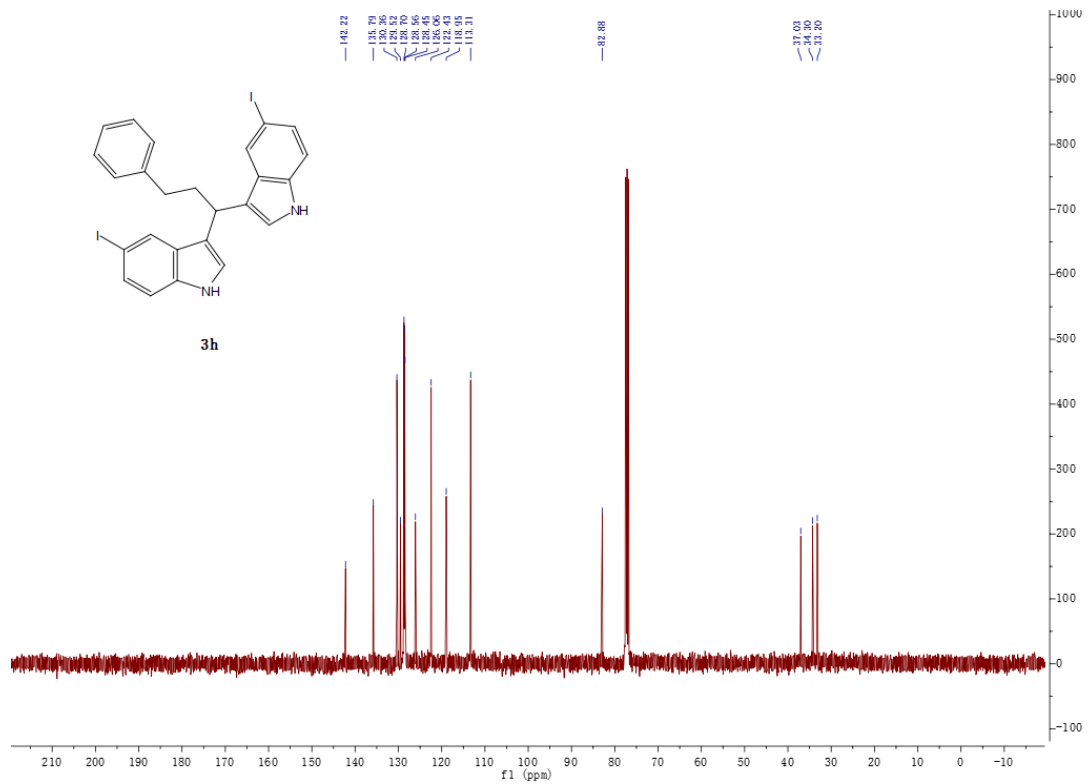

### <sup>1</sup>H NMR of 3j

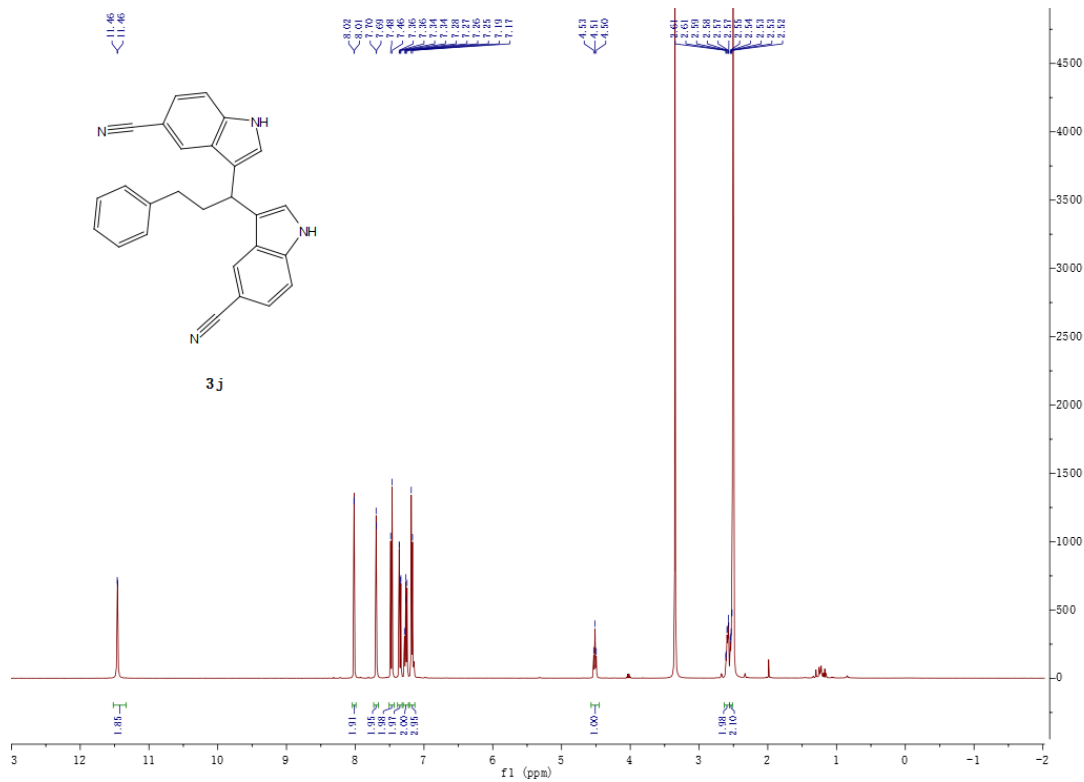

### <sup>13</sup>C NMR of 3h

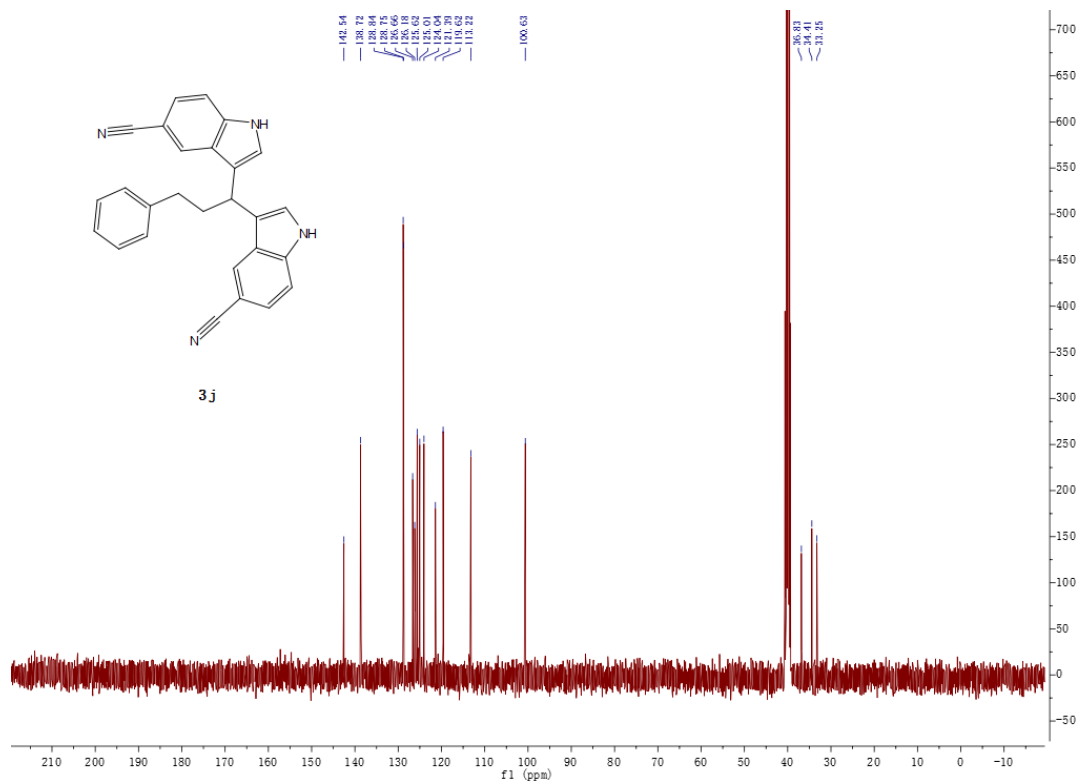

### <sup>1</sup>H NMR of 3k

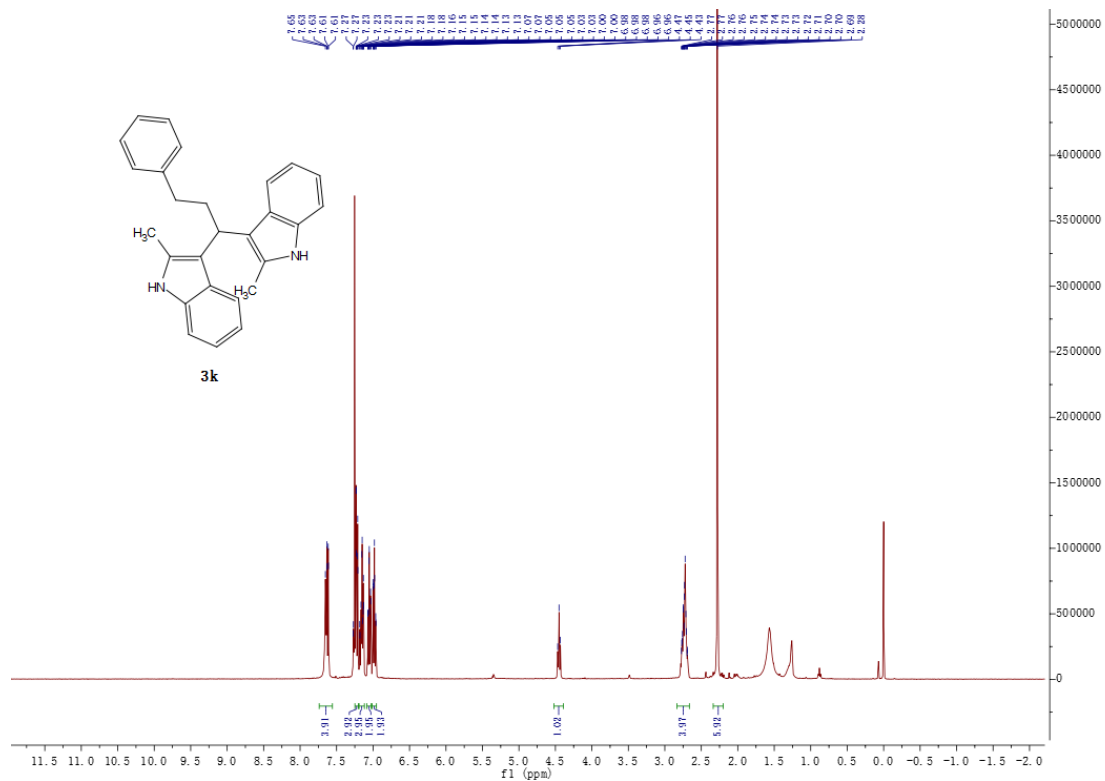

### <sup>13</sup>C NMR of 3k

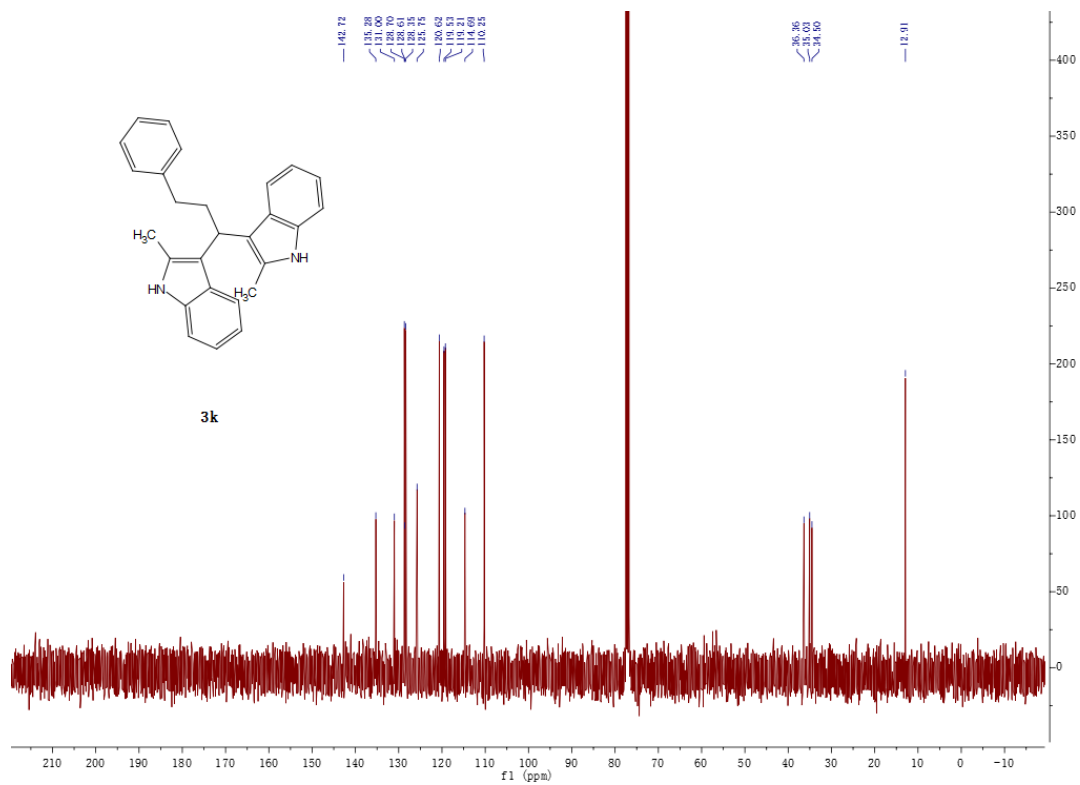

### <sup>1</sup>H NMR of 3m

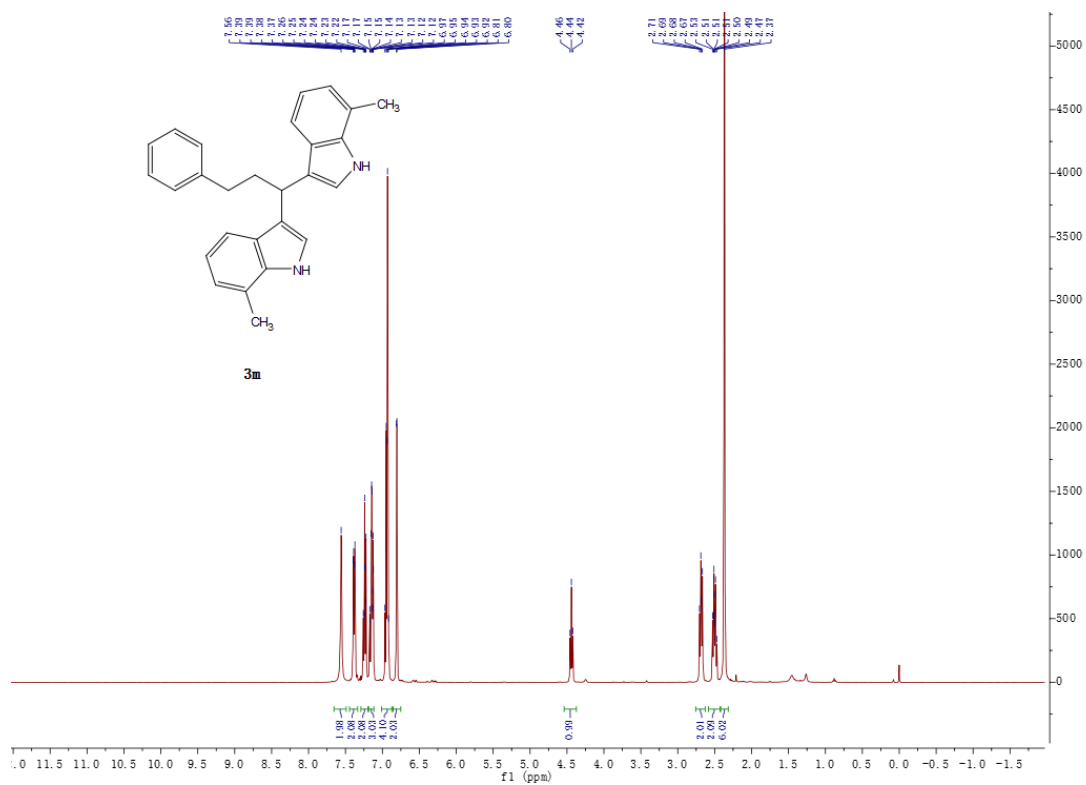

### <sup>13</sup>C NMR of 3m

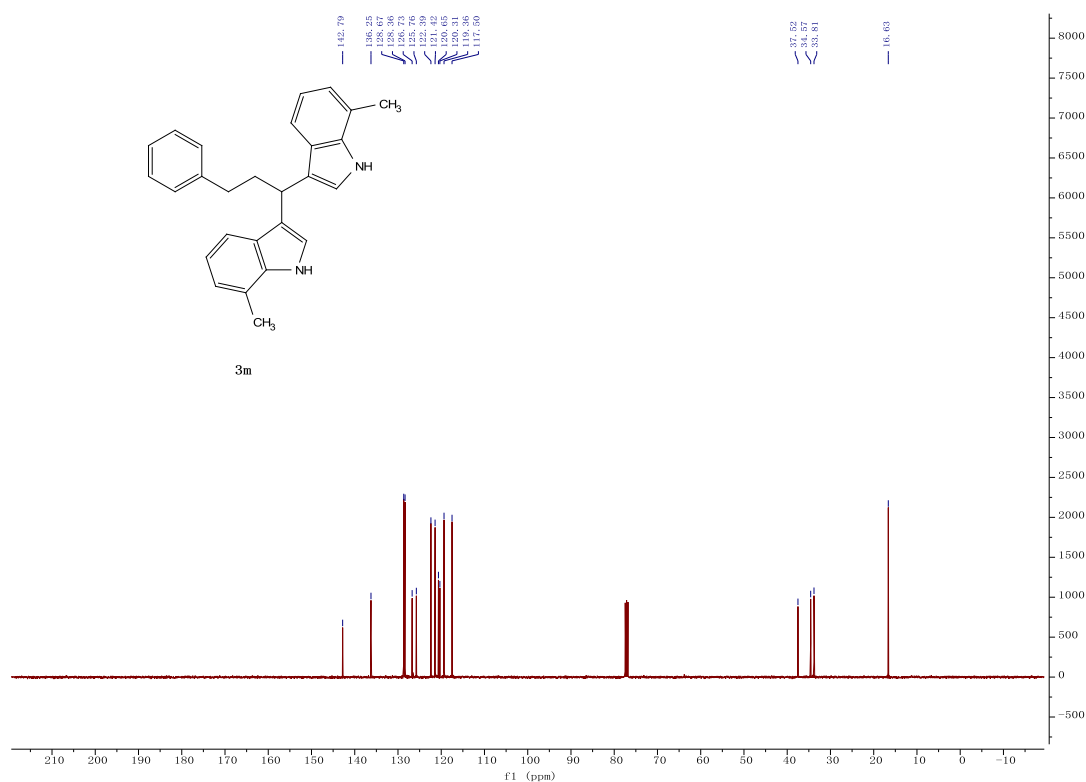

### <sup>1</sup>H NMR of 3n

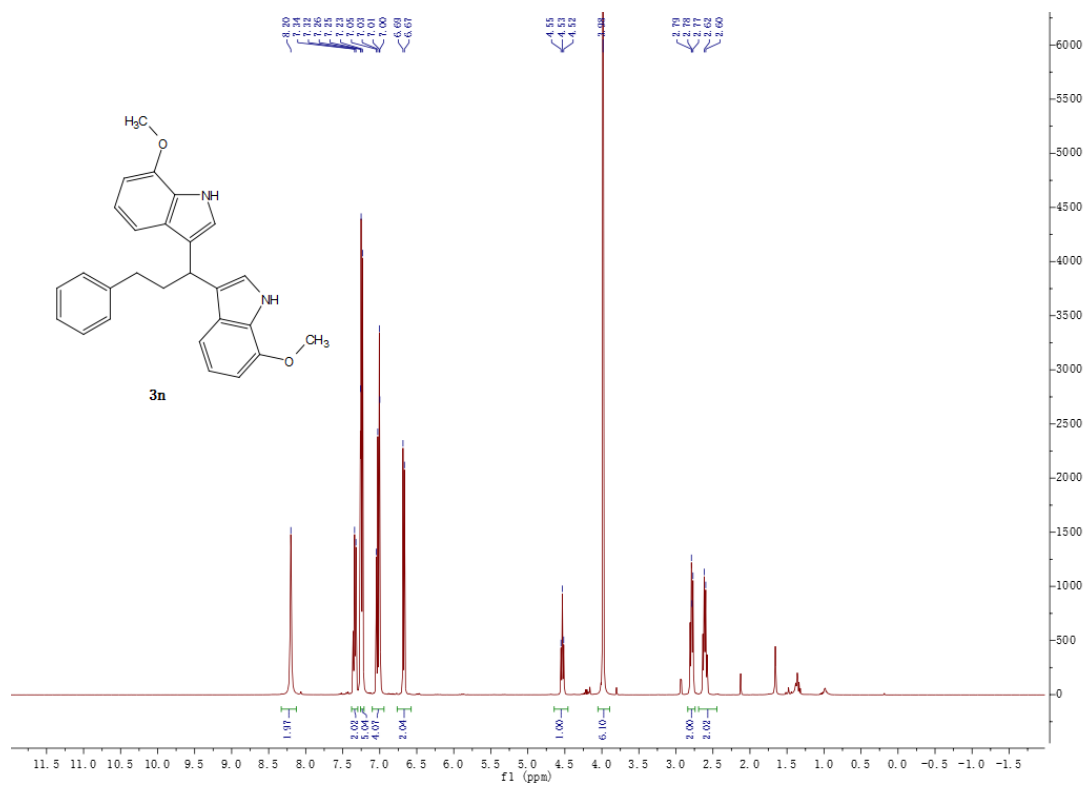

### <sup>13</sup>C NMR of 3n

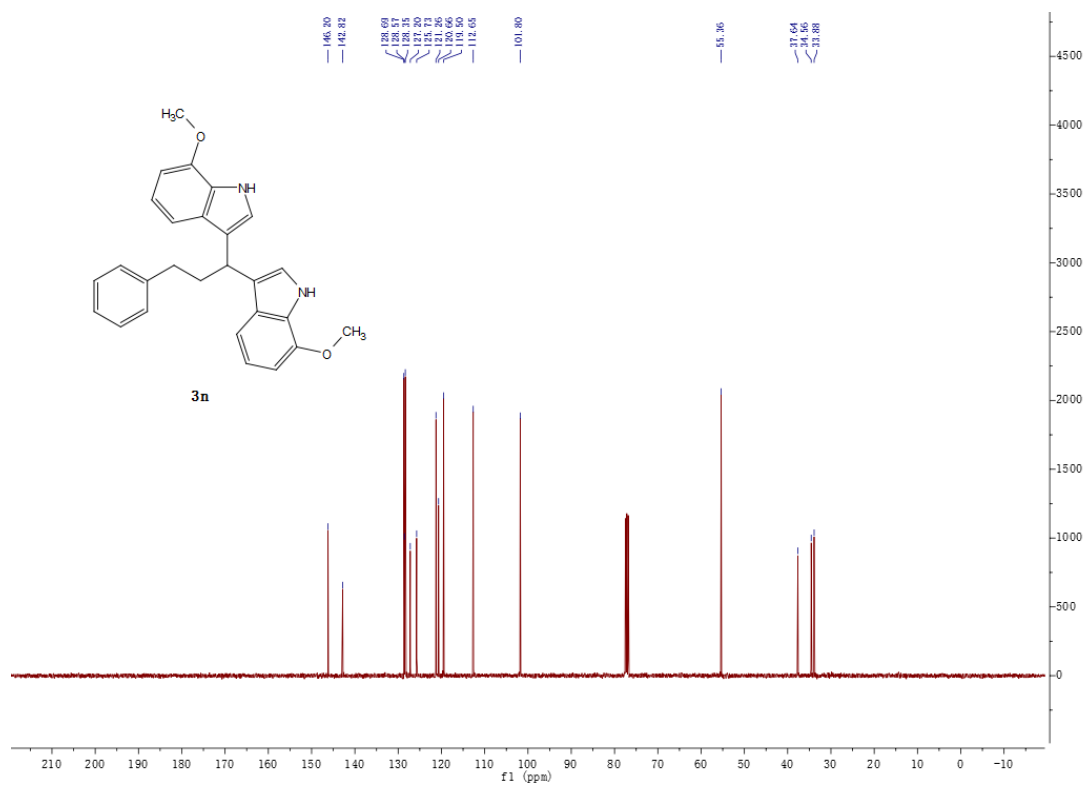



### <sup>1</sup>H NMR of 3p

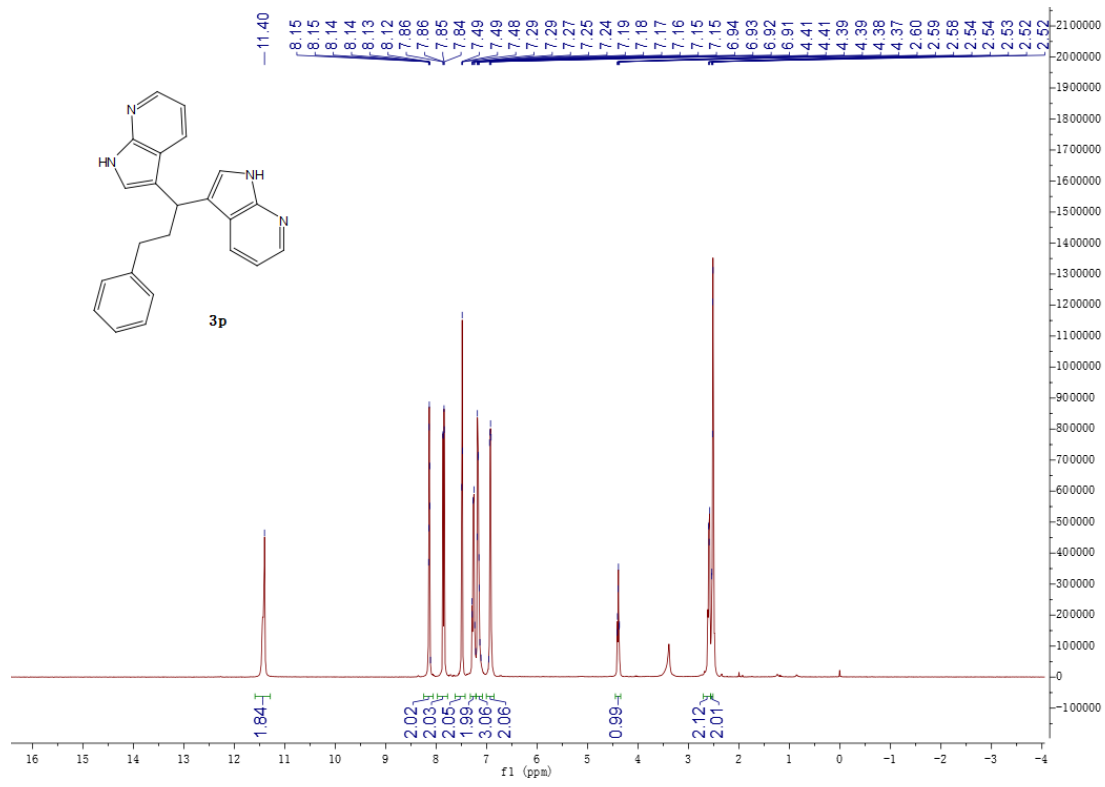

### <sup>13</sup>C NMR of 3p

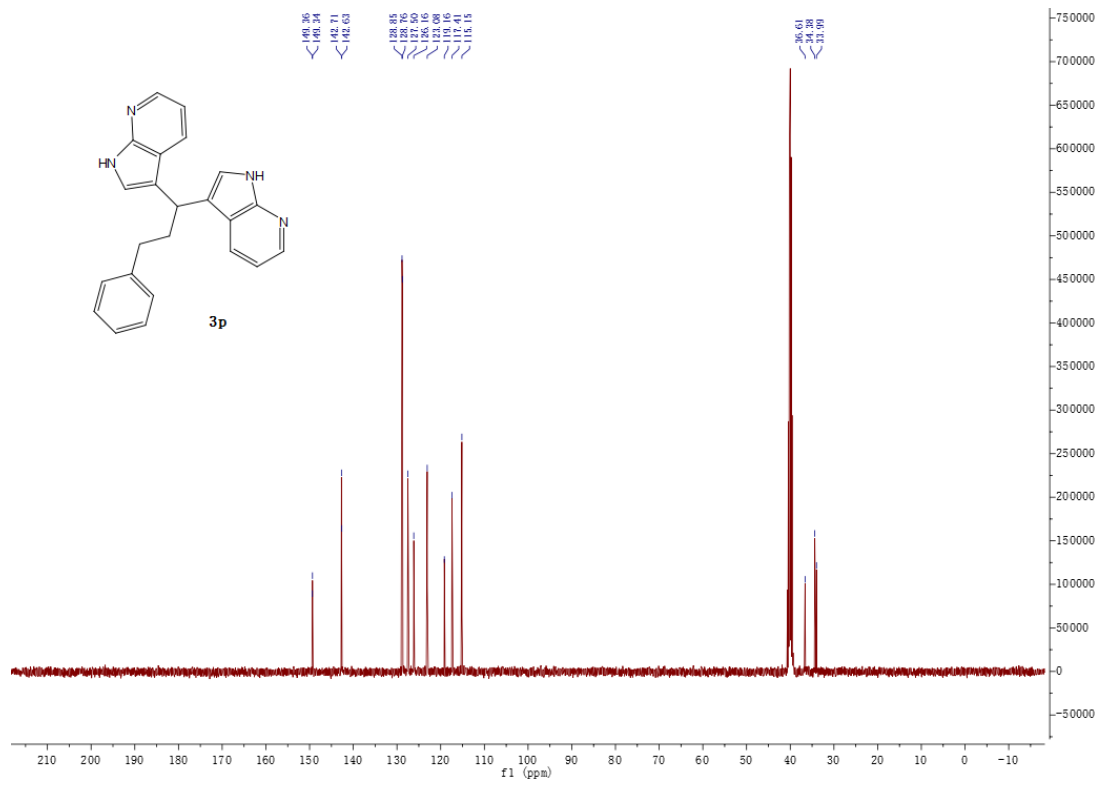



### <sup>1</sup>H NMR of 3q

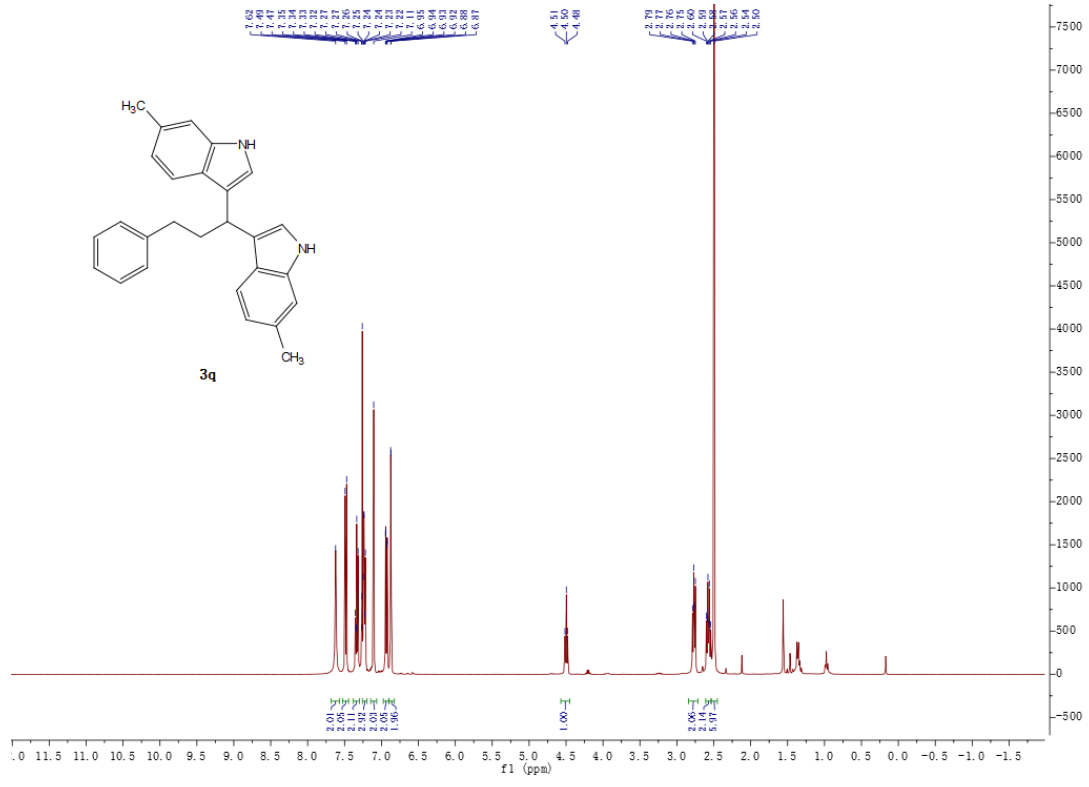

### <sup>13</sup>C NMR of 3q

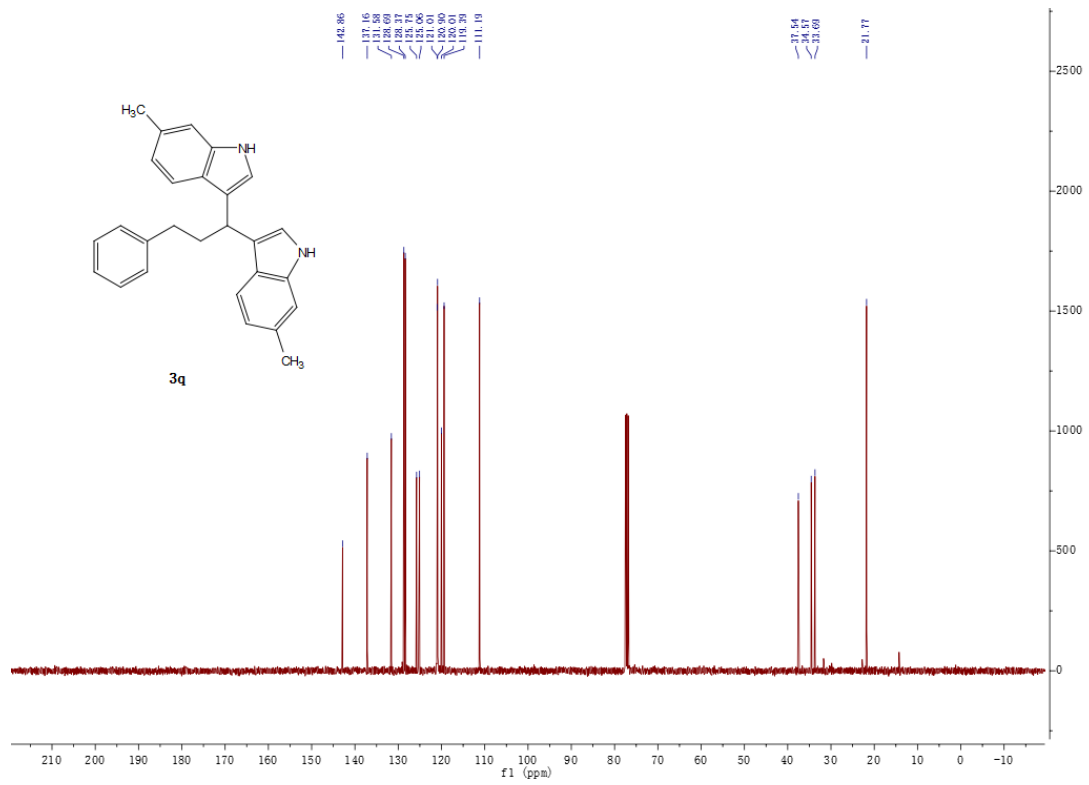

### <sup>1</sup>H NMR of 3r

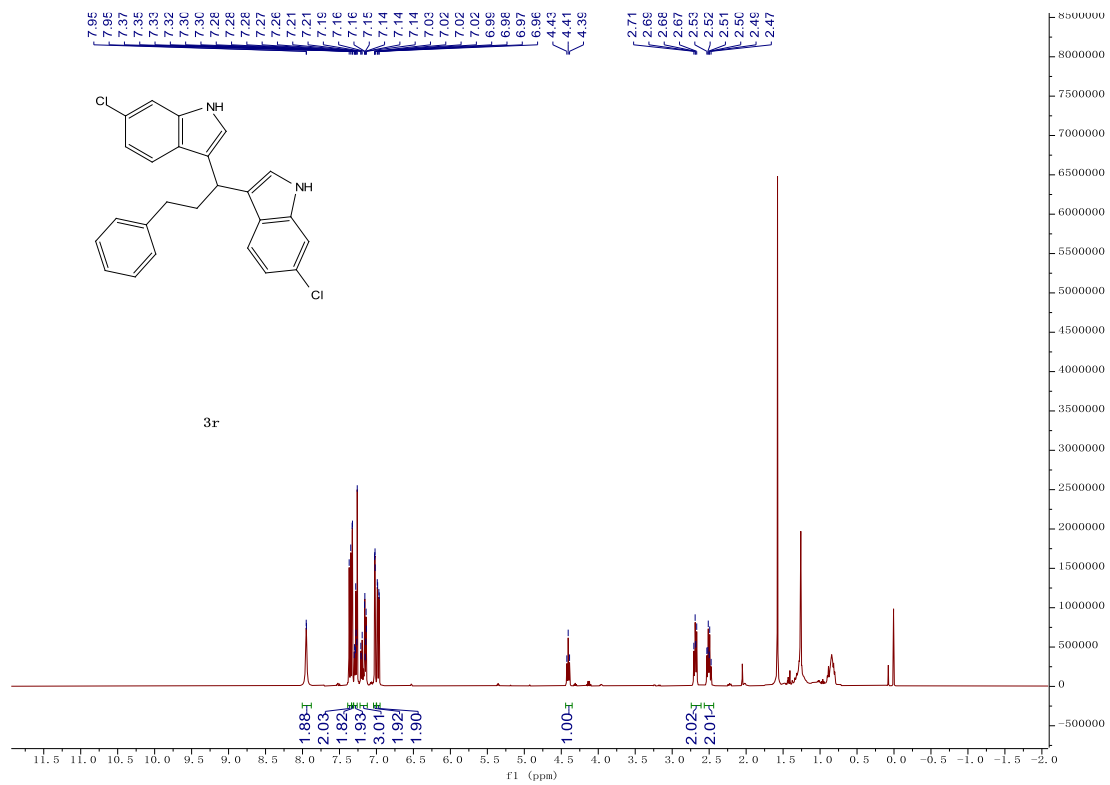

### <sup>13</sup>C NMR of 3r

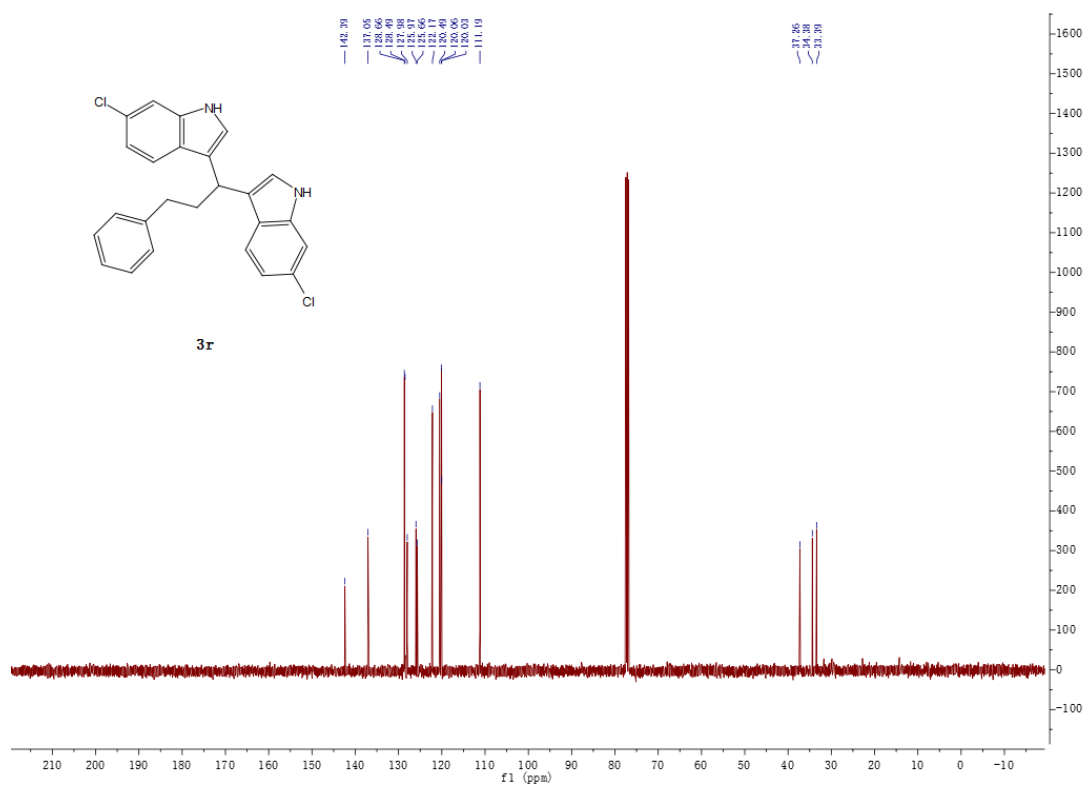

### <sup>1</sup>H NMR of 3s

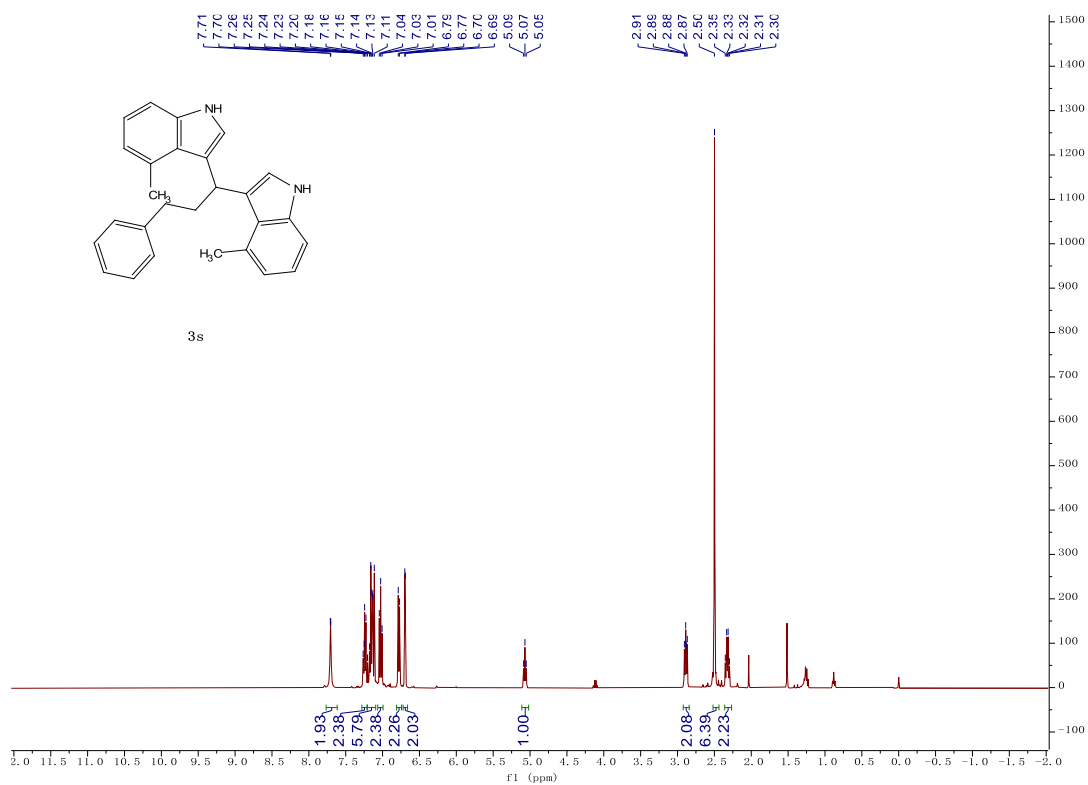

### <sup>13</sup>C NMR of 3s

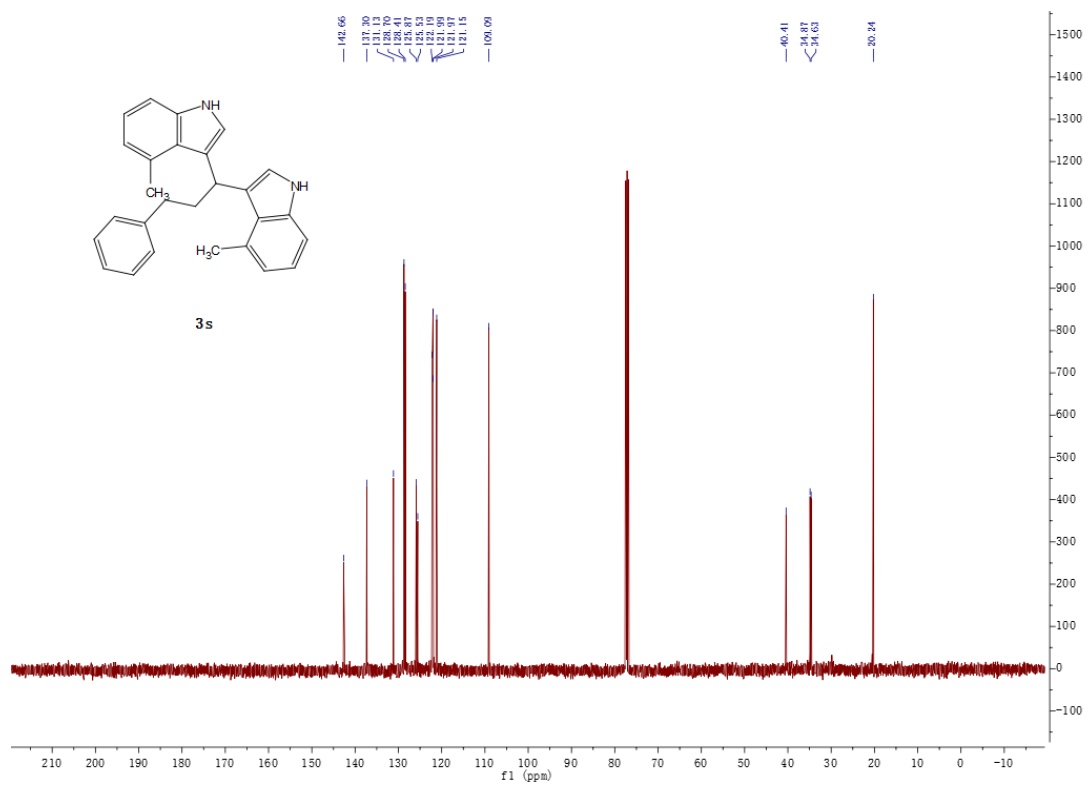

### <sup>1</sup>H NMR of 3t

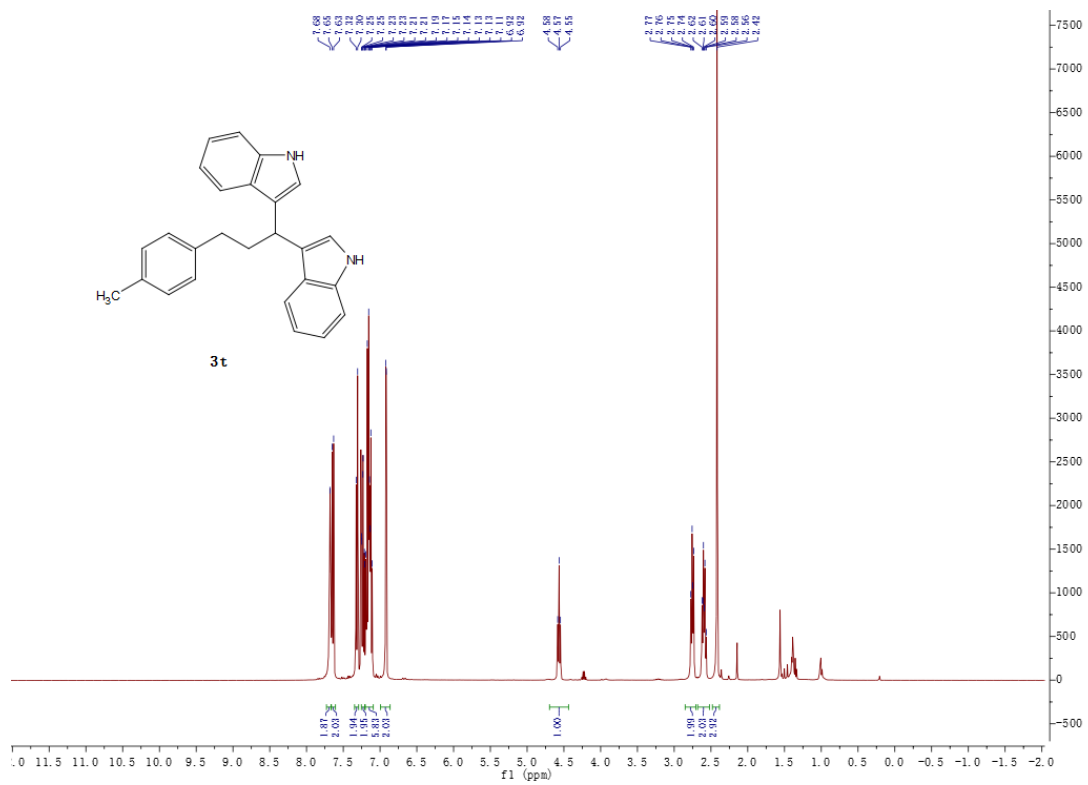

### <sup>13</sup>C NMR of 3t

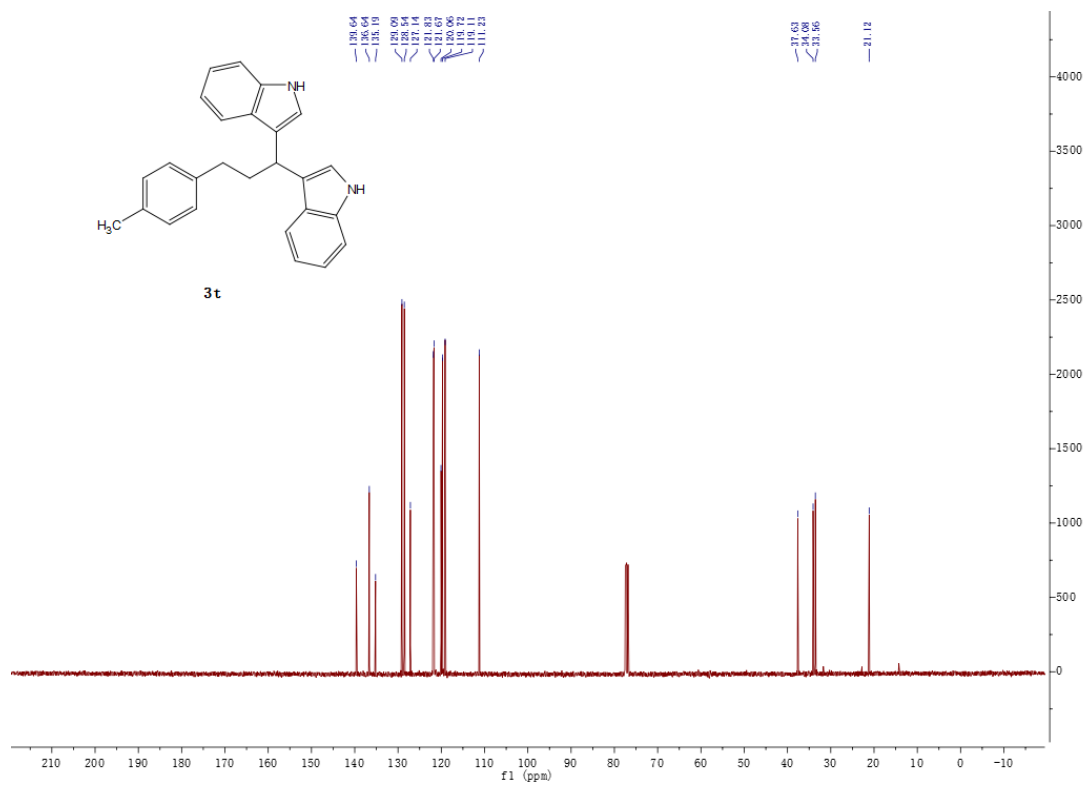

### <sup>1</sup>H NMR of 3u

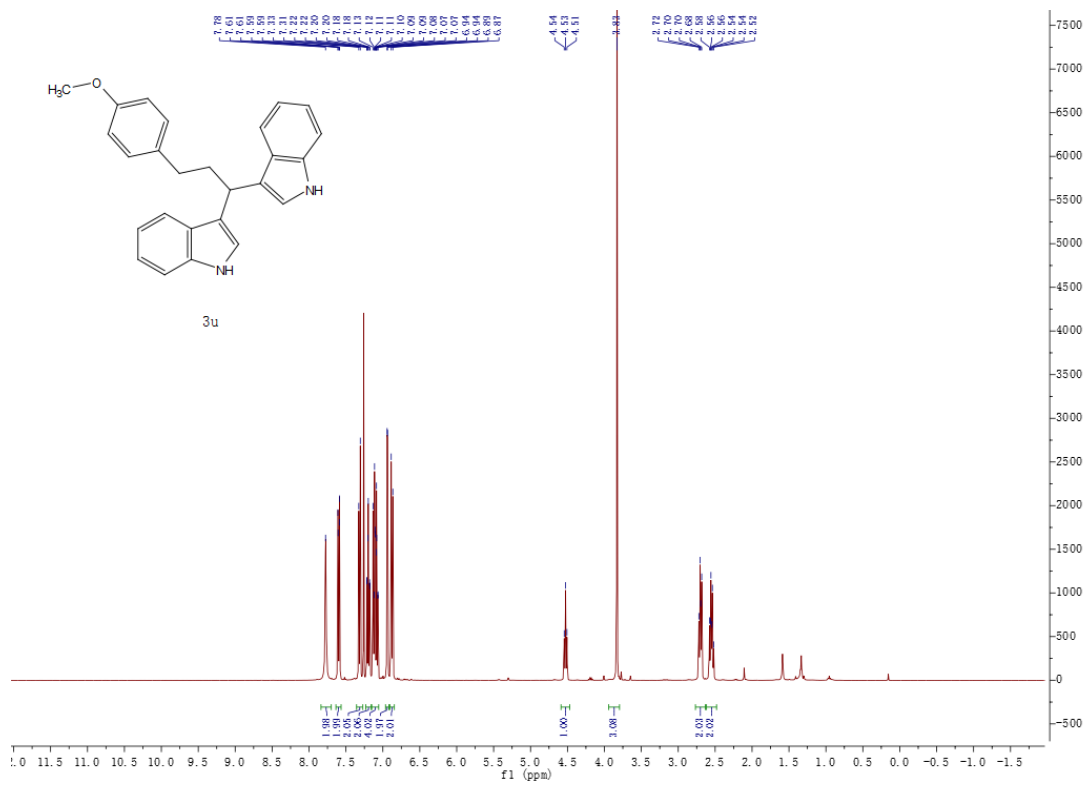

### <sup>13</sup>C NMR of 3u

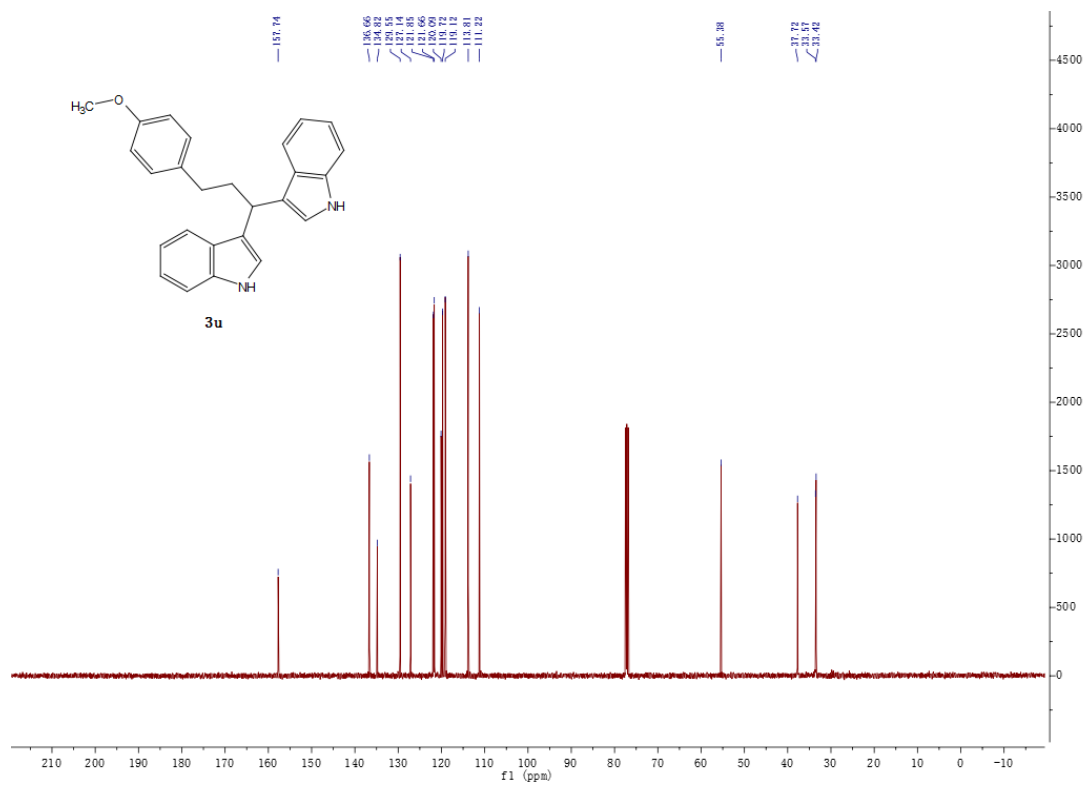

### <sup>1</sup>H NMR of 3v

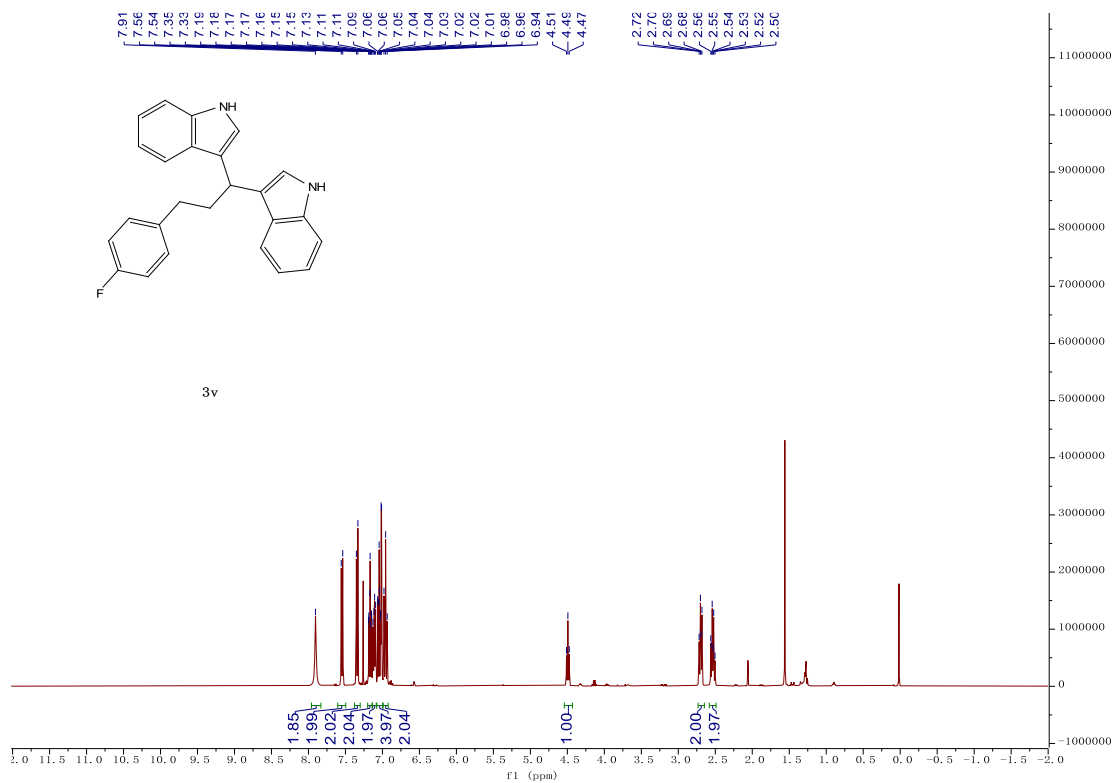

### <sup>13</sup>C NMR of 3v

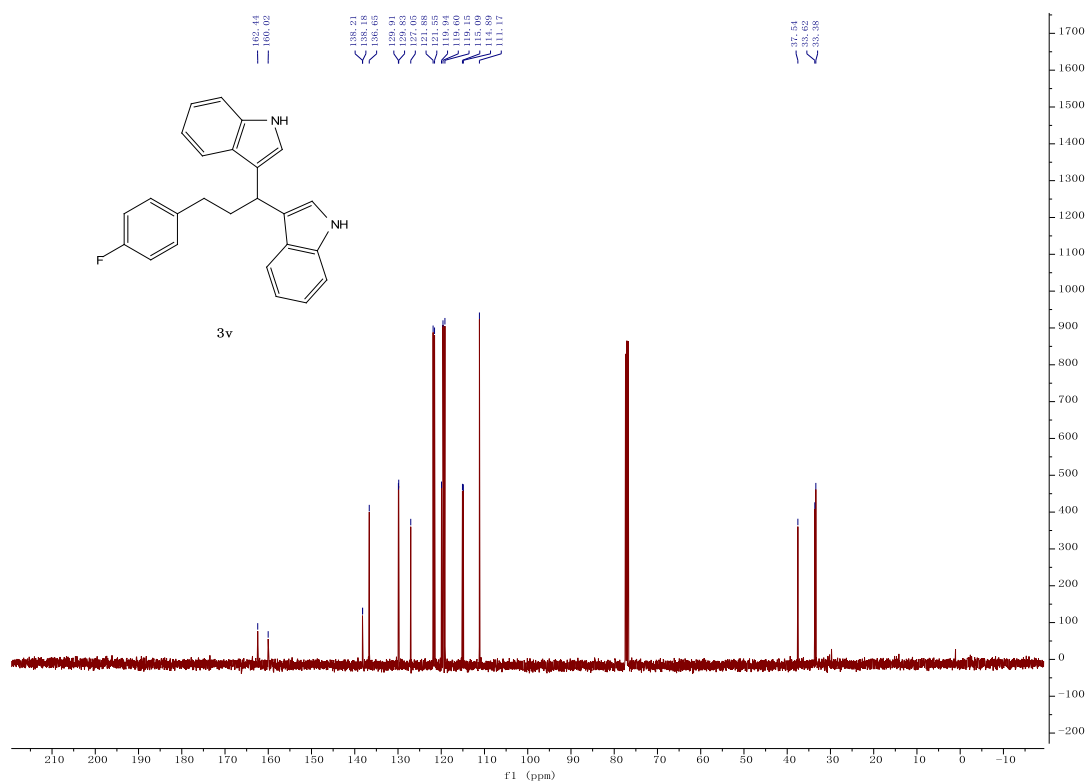

<sup>19</sup>F NMR of **3v**

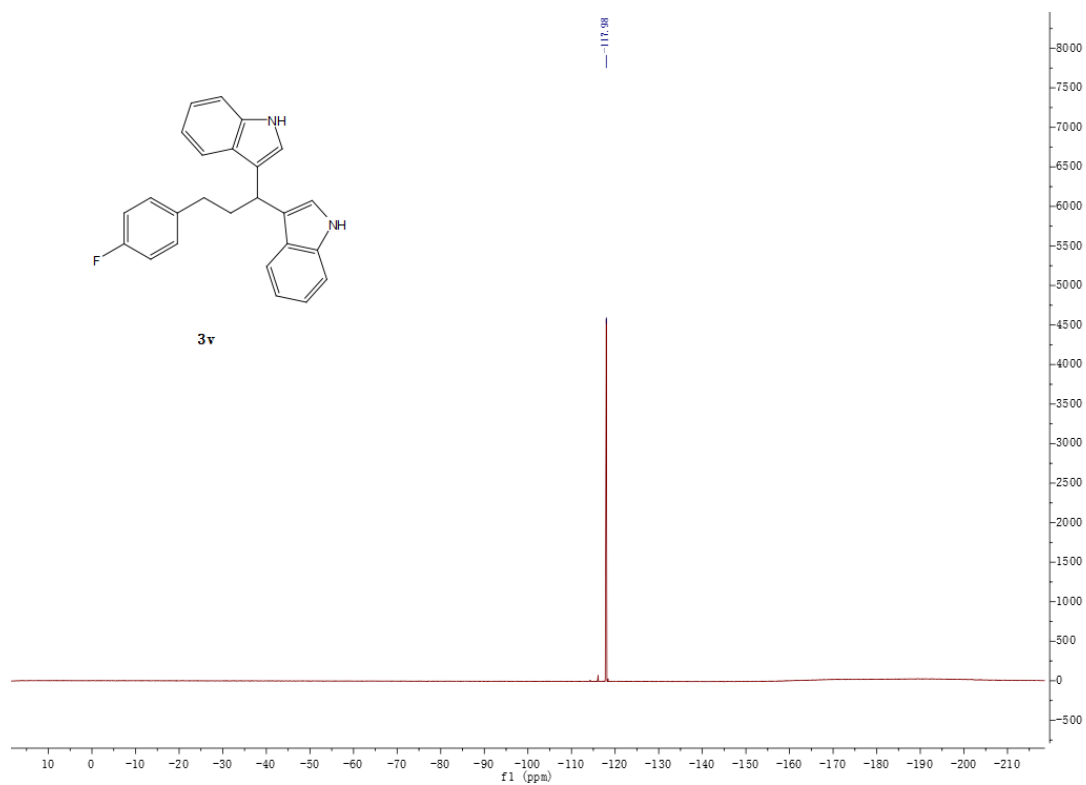

<sup>1</sup>H NMR of **3w**

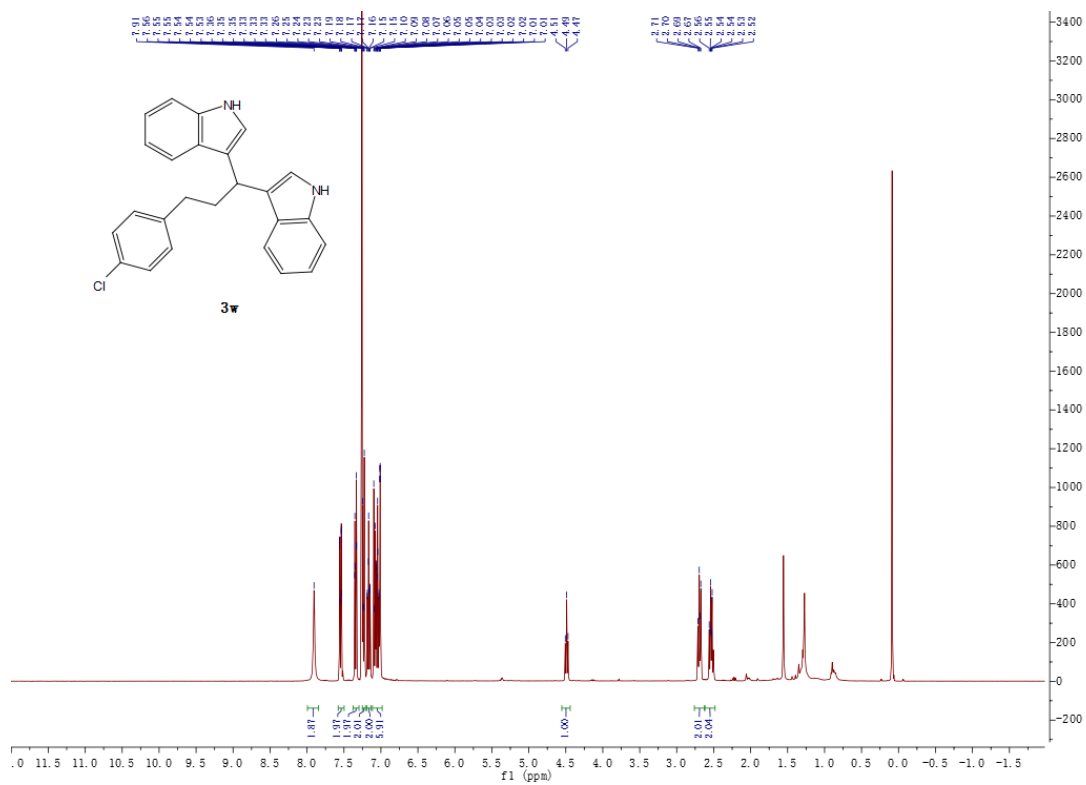

### <sup>13</sup>C NMR of 3w

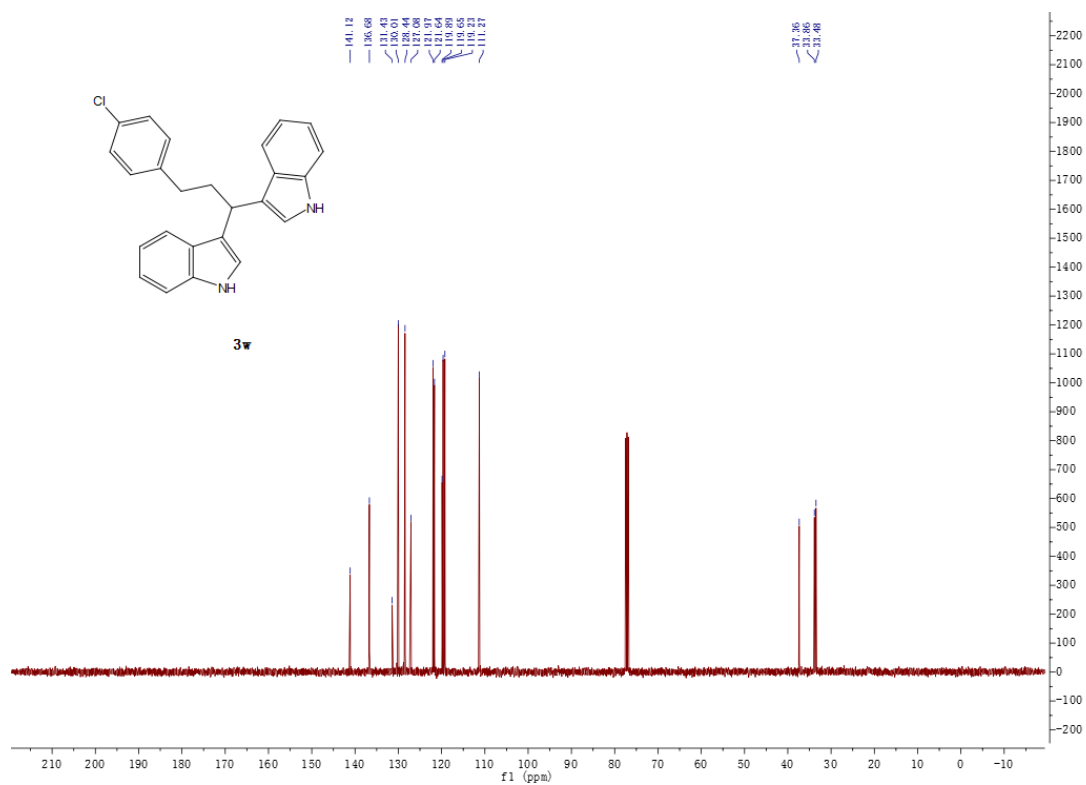

### <sup>1</sup>H NMR of 3x

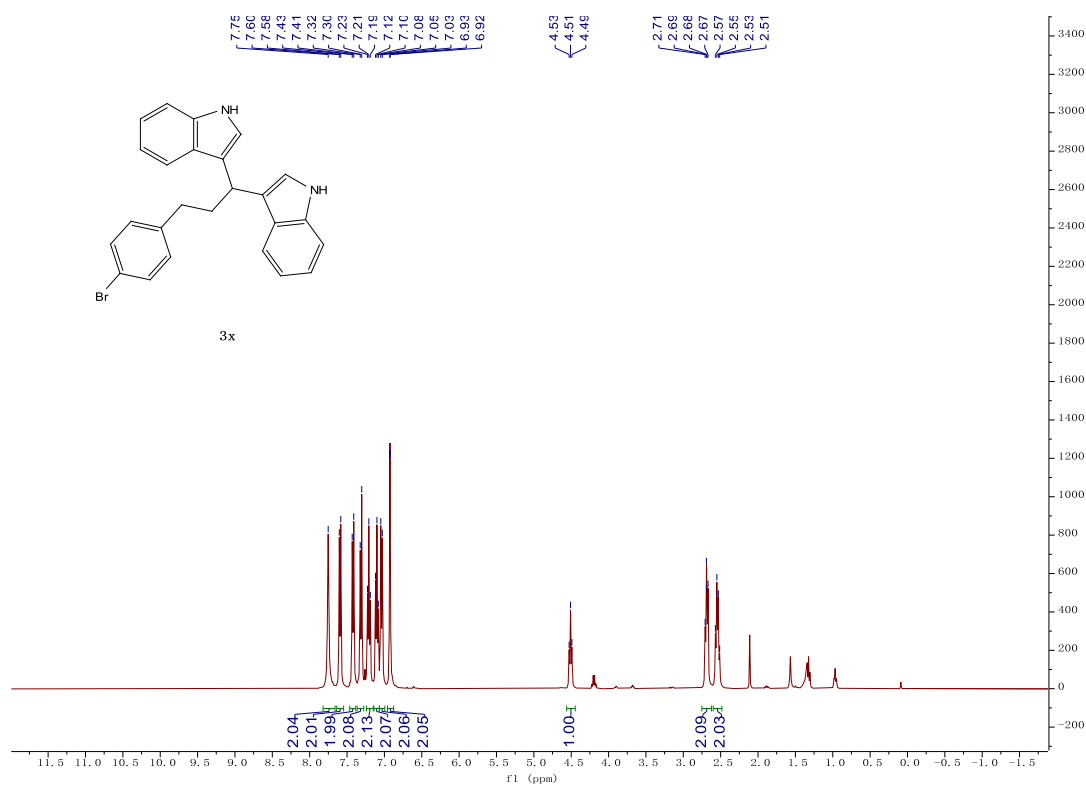



### <sup>13</sup>C NMR of 3x

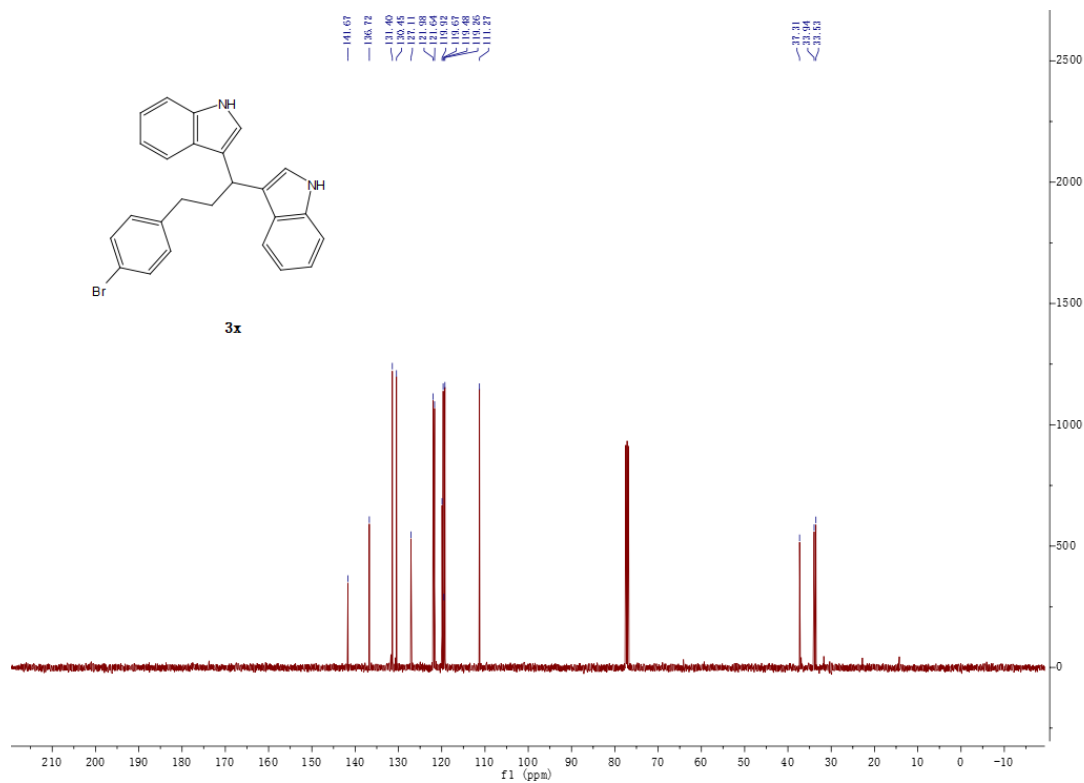

### <sup>1</sup>H NMR of 3y

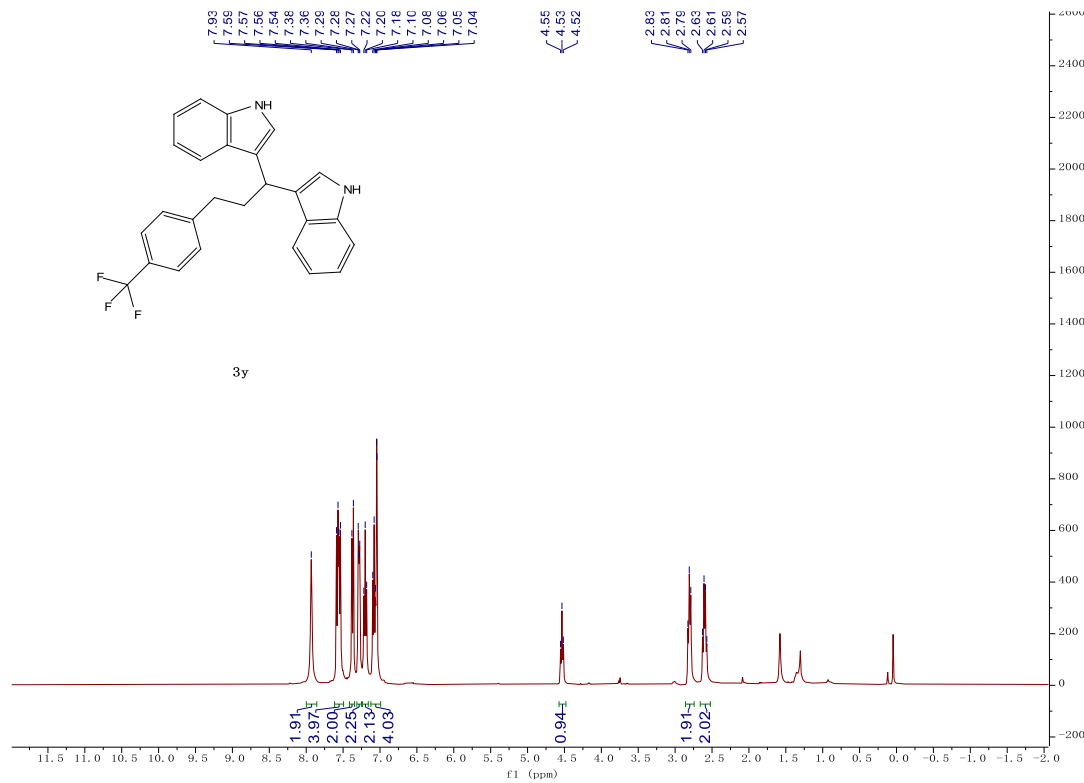

### <sup>13</sup>C NMR of 3y

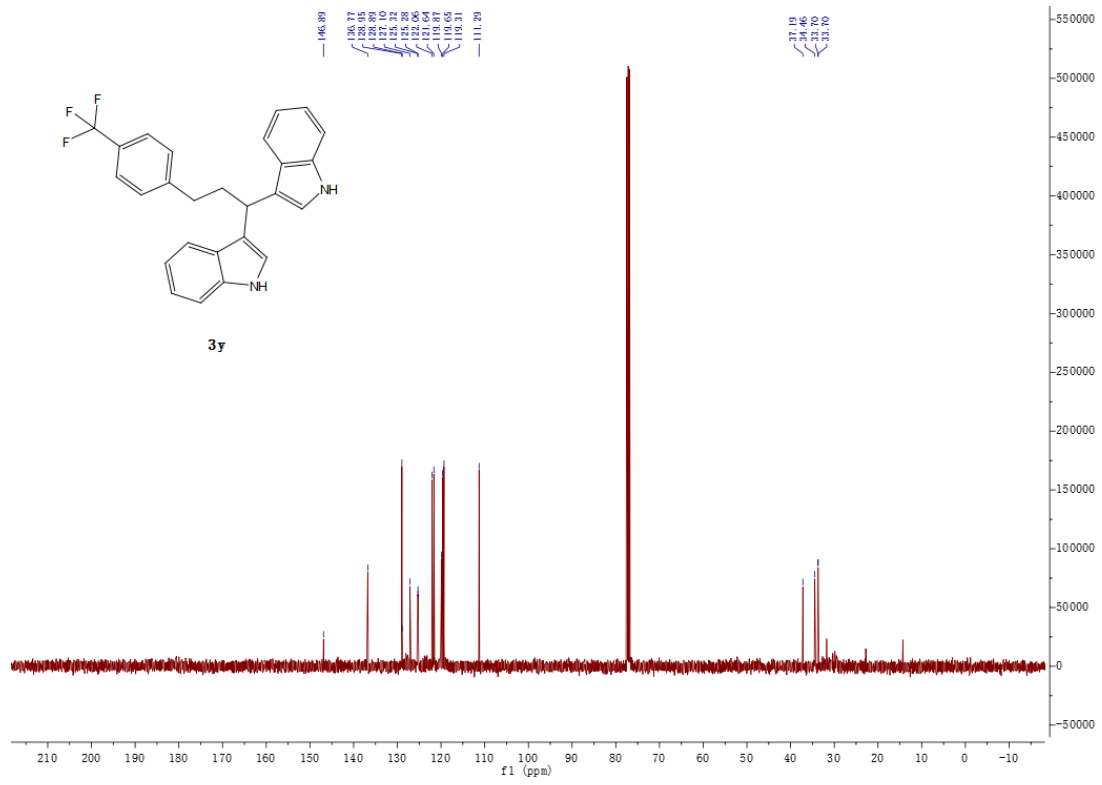

### <sup>19</sup>F NMR of 3y

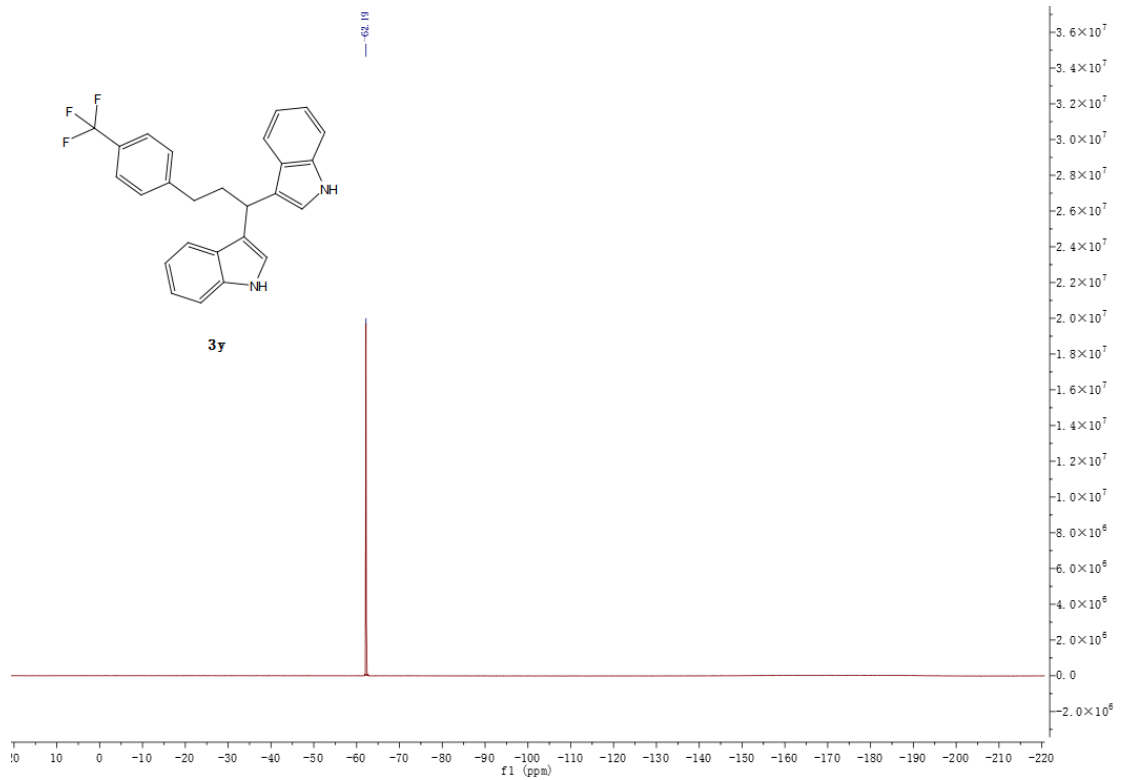

### $^1\text{H}$ NMR of **3z**

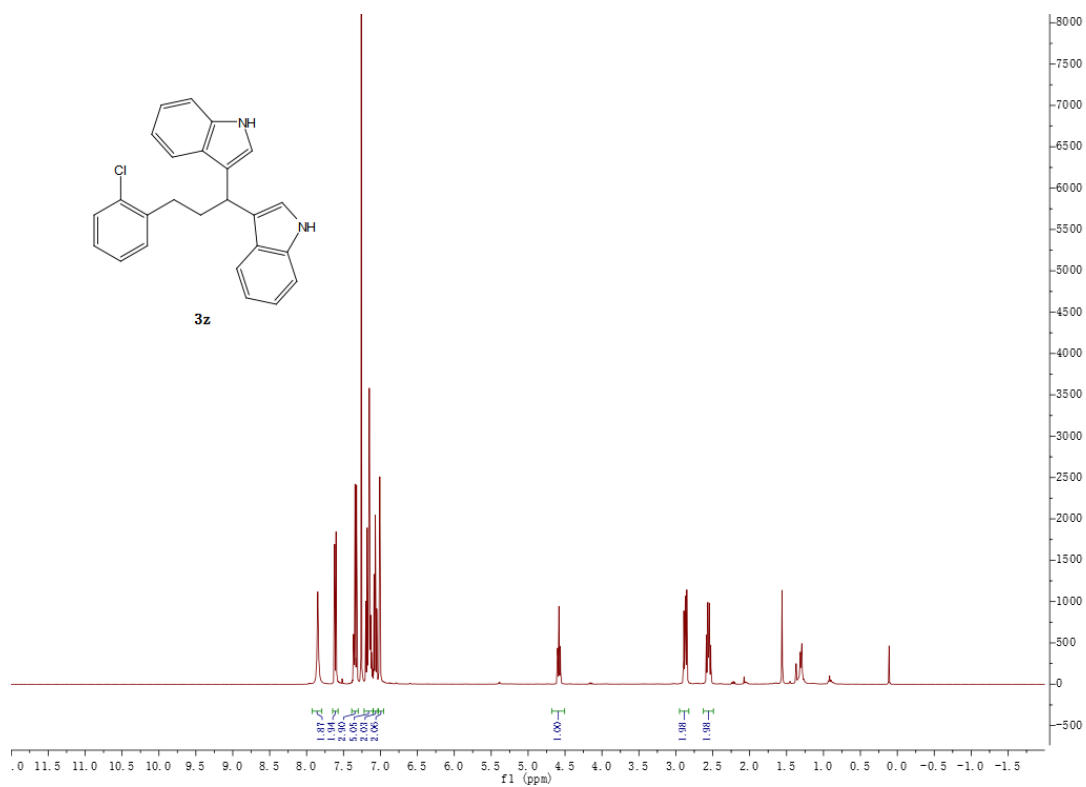

### $^{13}\text{C}$ NMR of **3z**

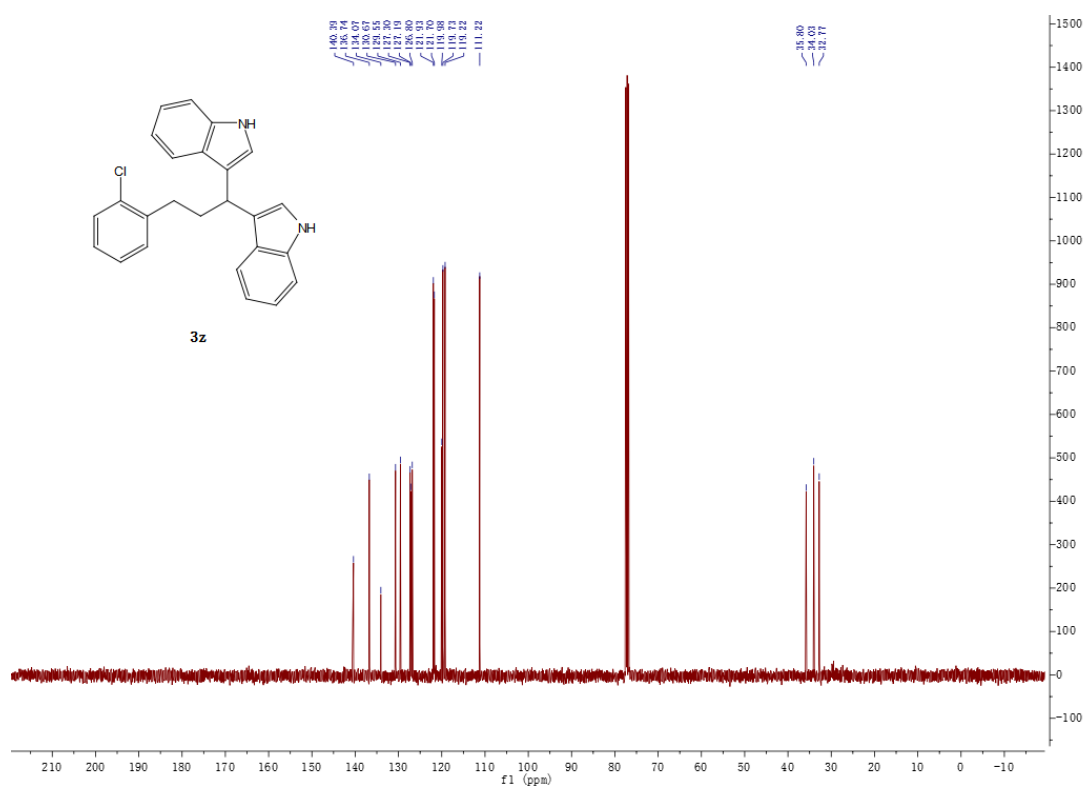

### <sup>1</sup>H NMR of 3aa

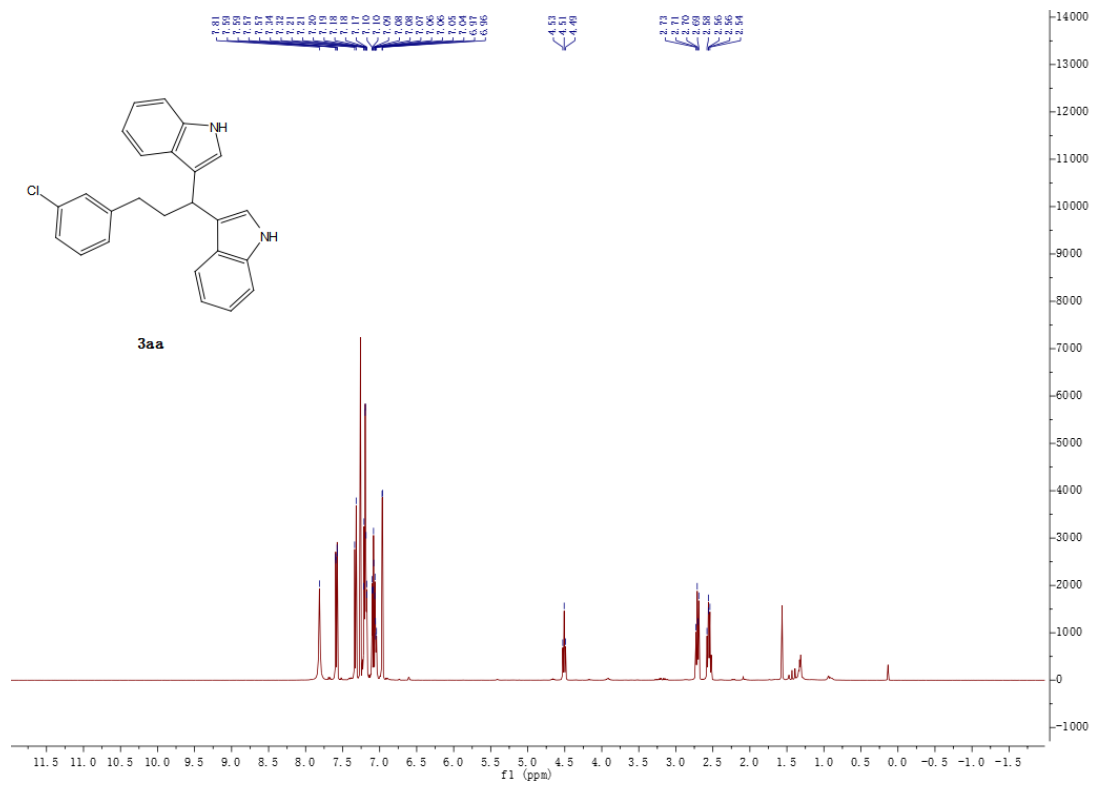

### <sup>13</sup>C NMR of 3aa

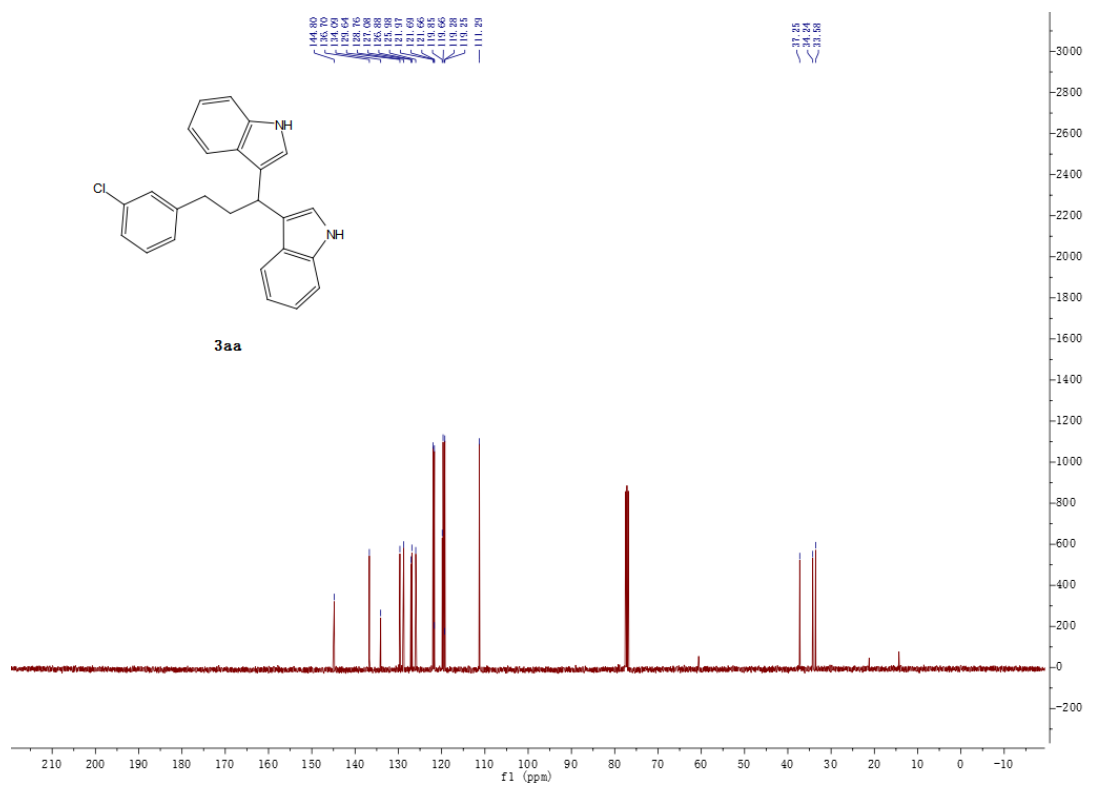

### <sup>1</sup>H NMR of 3ab

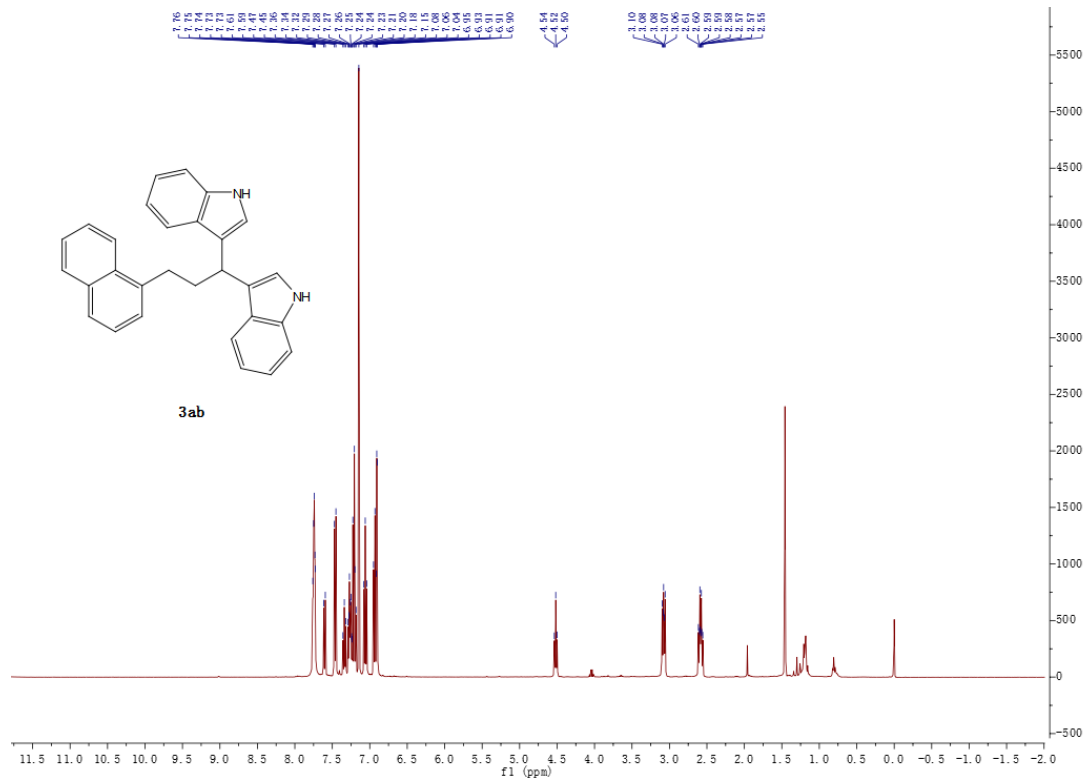

### <sup>13</sup>C NMR of 3ab

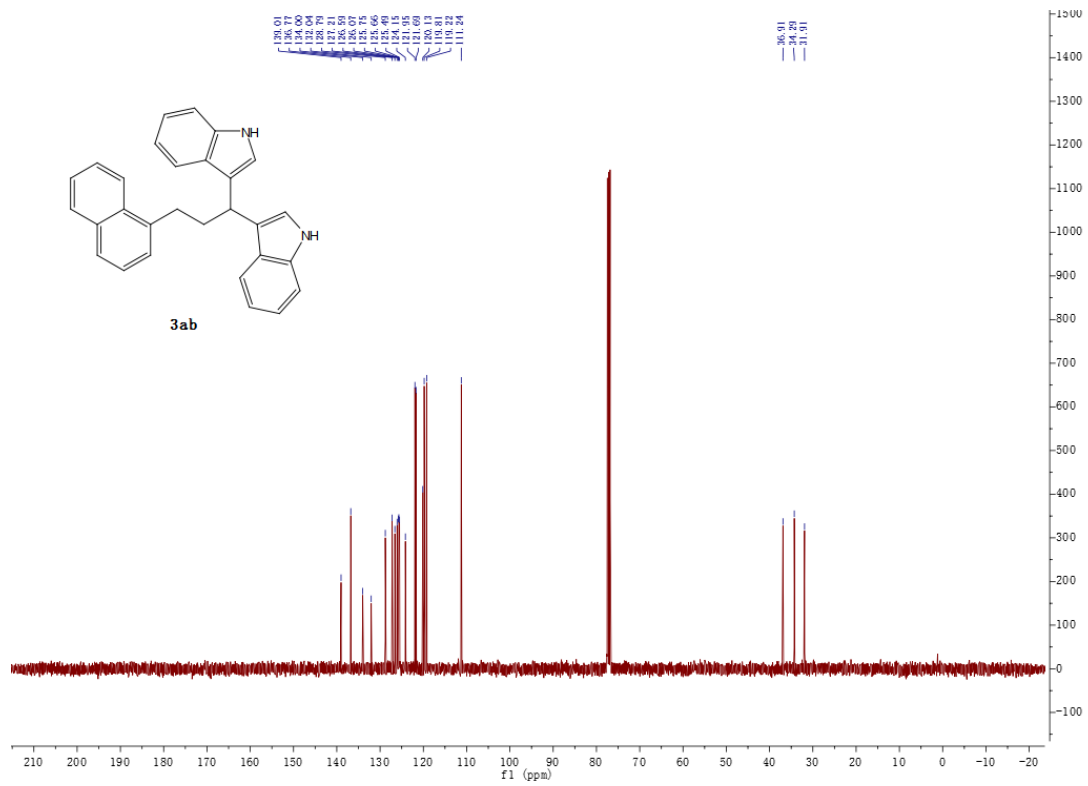

### <sup>1</sup>H NMR of 3ac

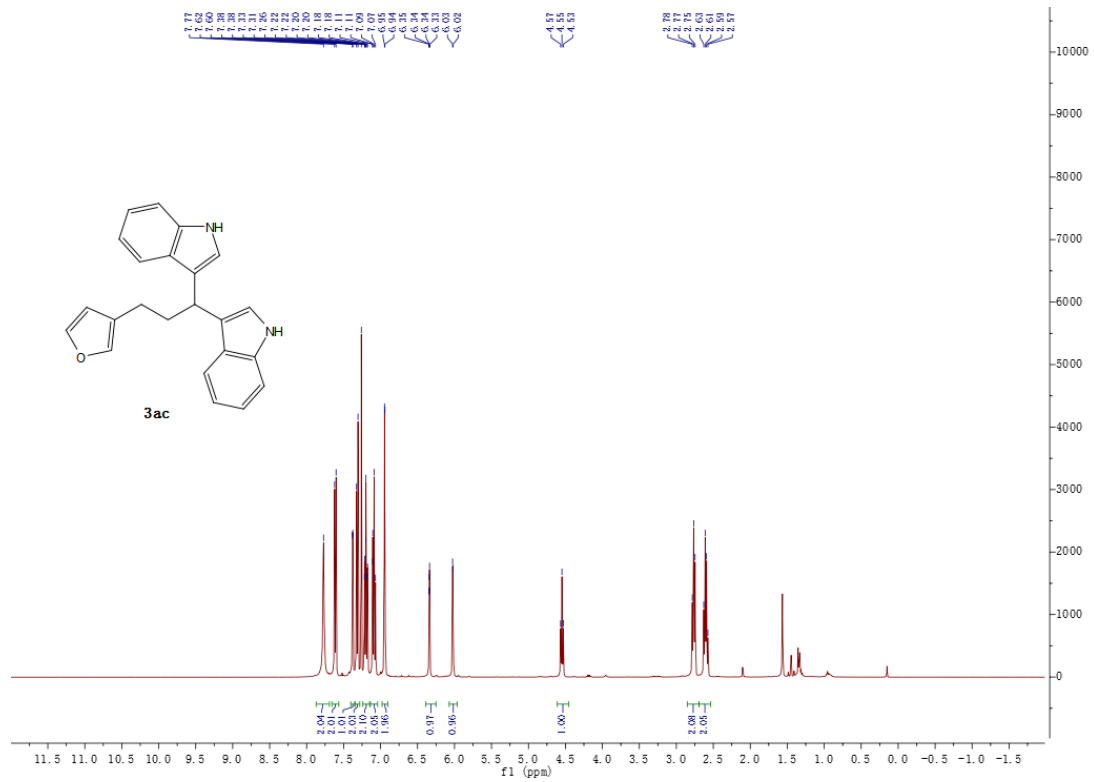

### <sup>13</sup>C NMR of 3ac

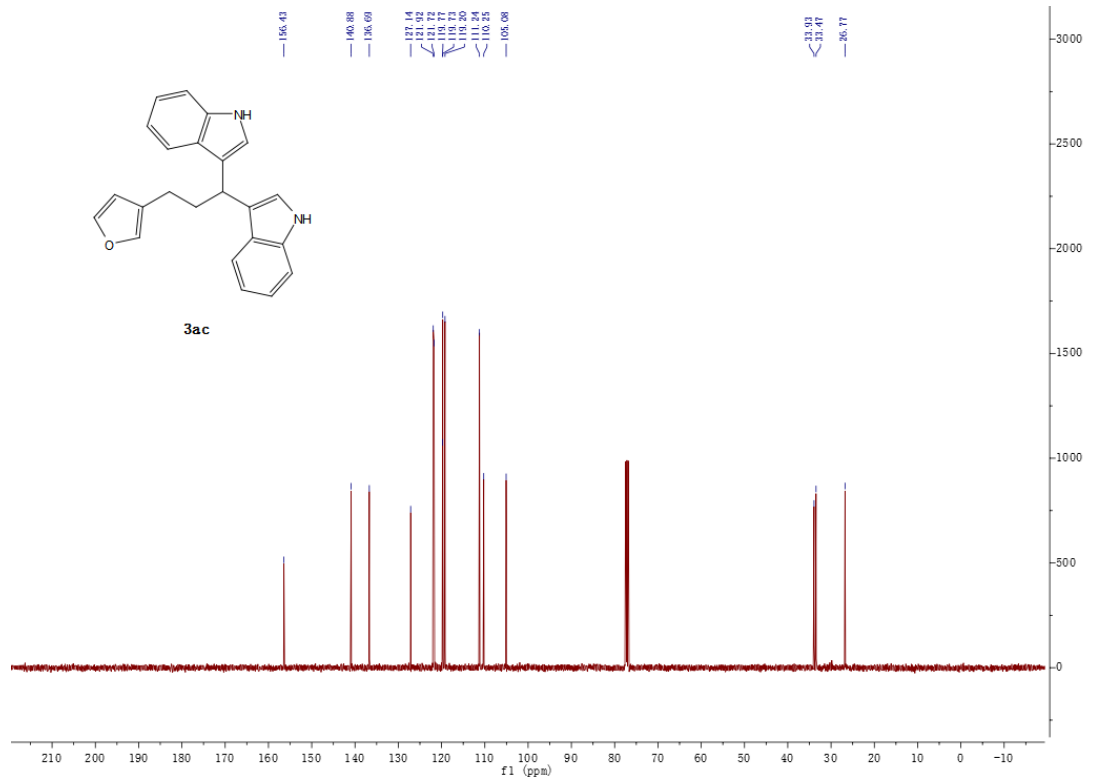

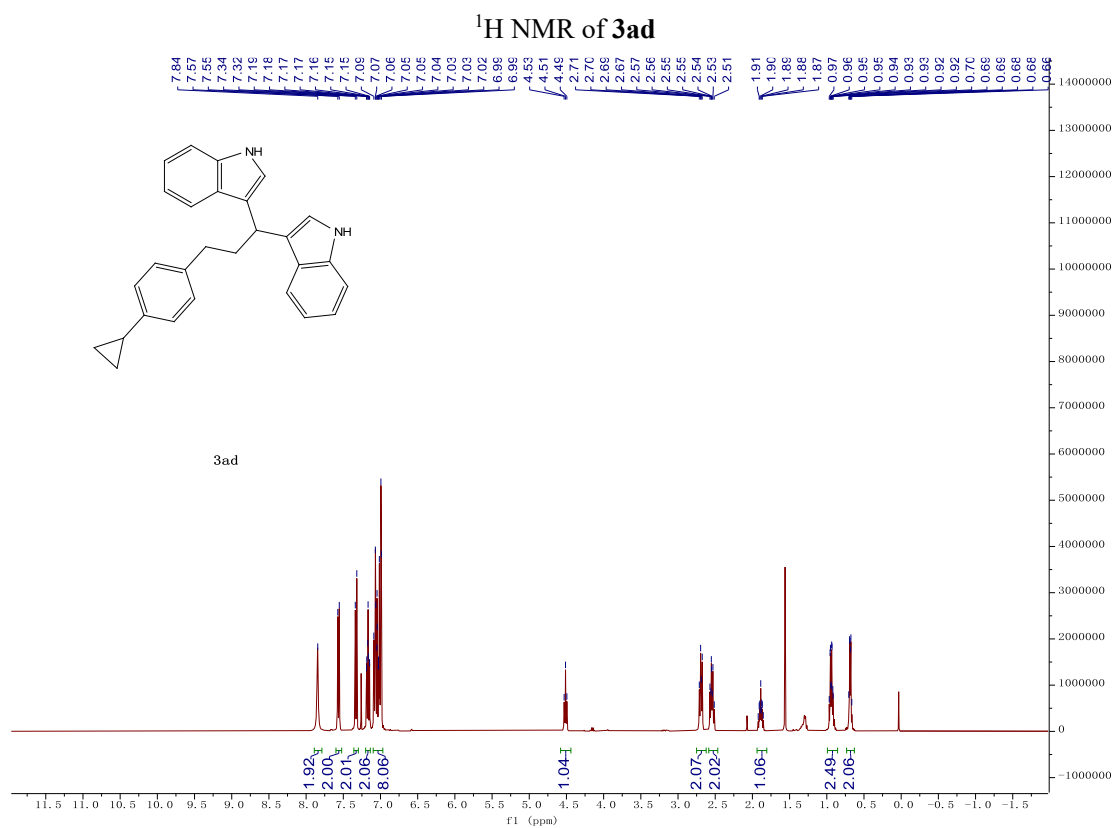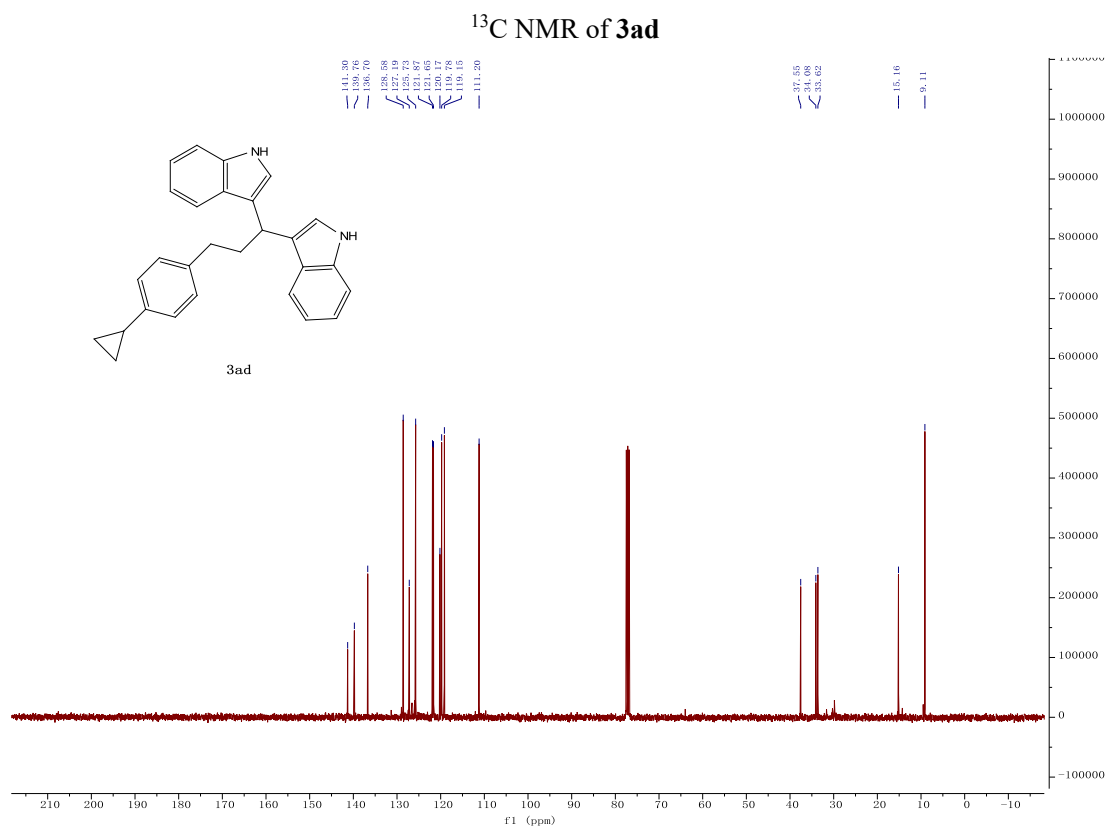

### <sup>1</sup>H NMR of 3ae

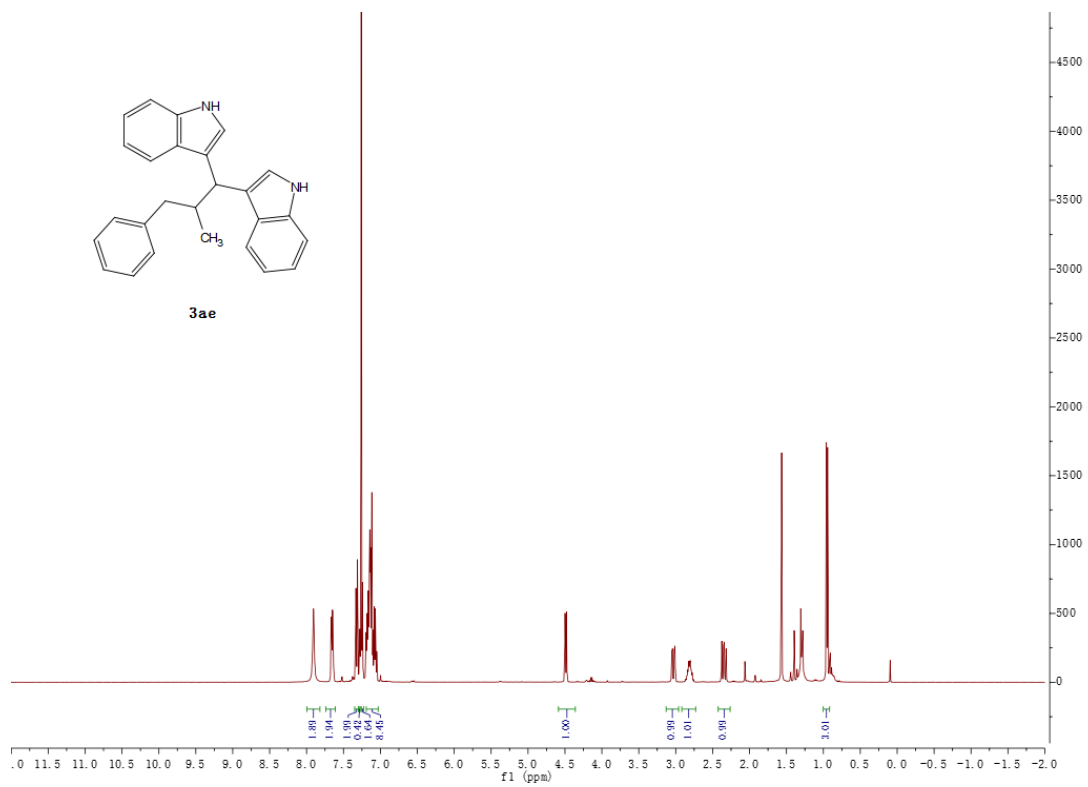

### <sup>13</sup>C NMR of 3ae

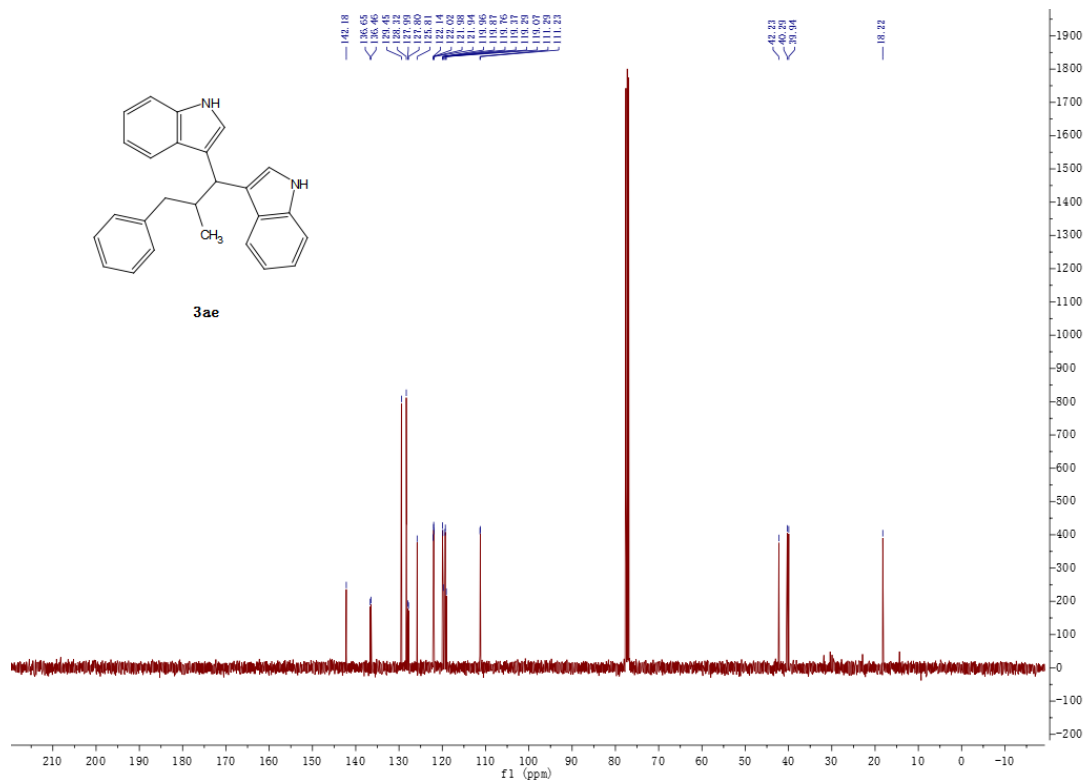



### <sup>1</sup>H NMR of 3ag

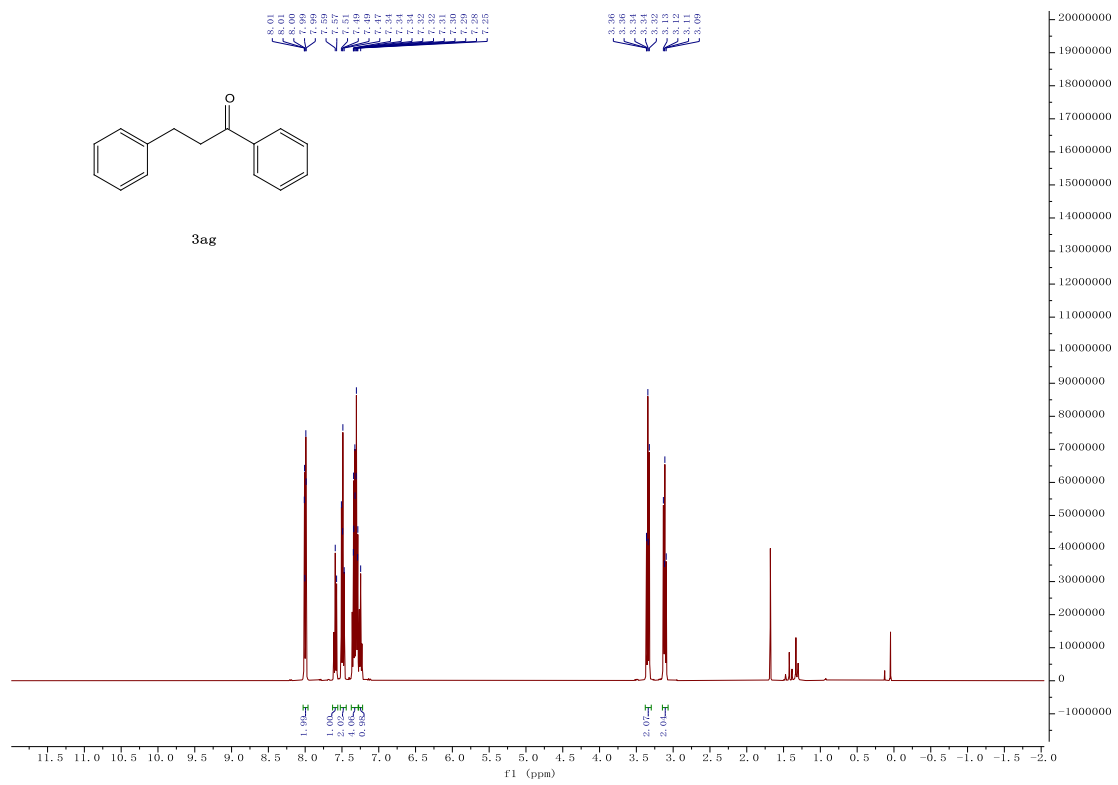

### <sup>1</sup>H NMR of 3ah

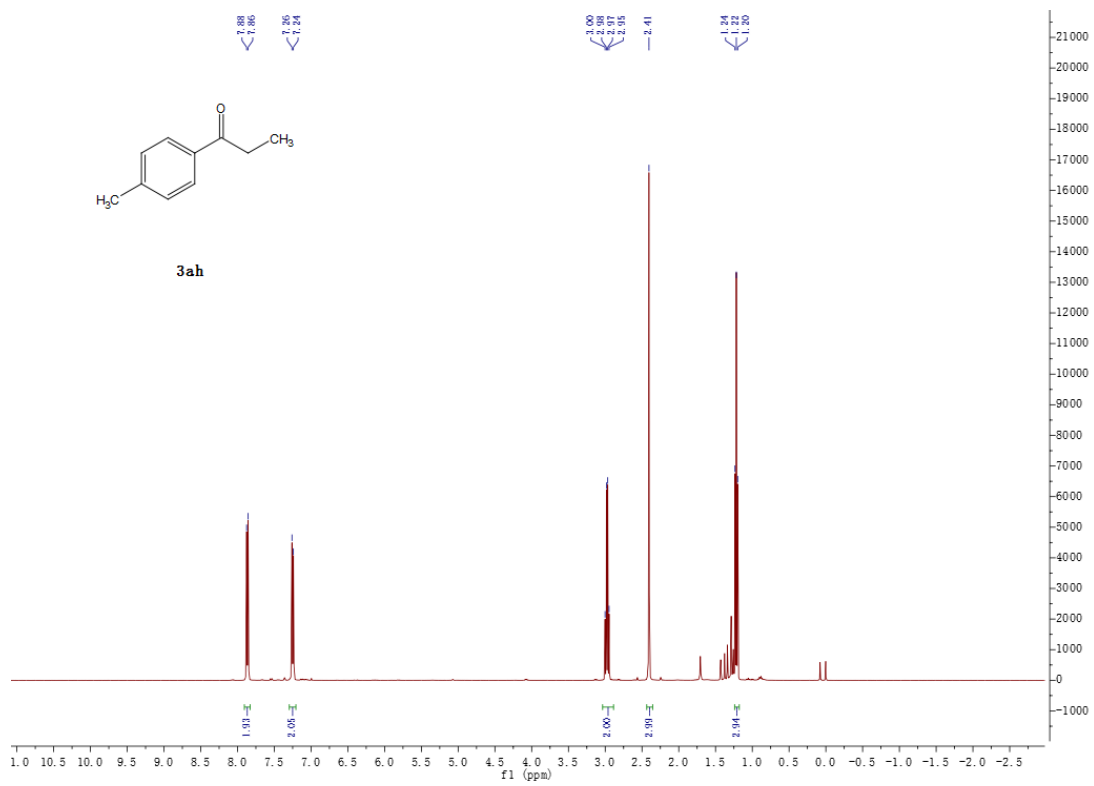

### $^{13}\text{C}$ NMR of **3ah**

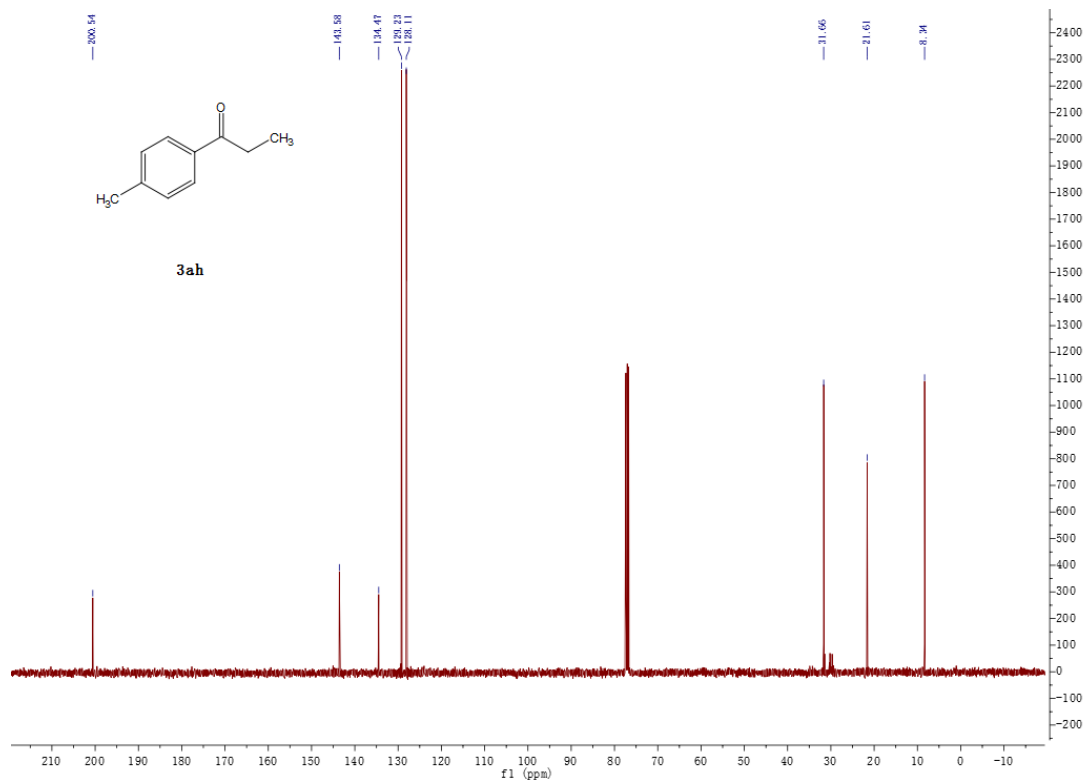

### $^1\text{H}$ NMR of **3ai**

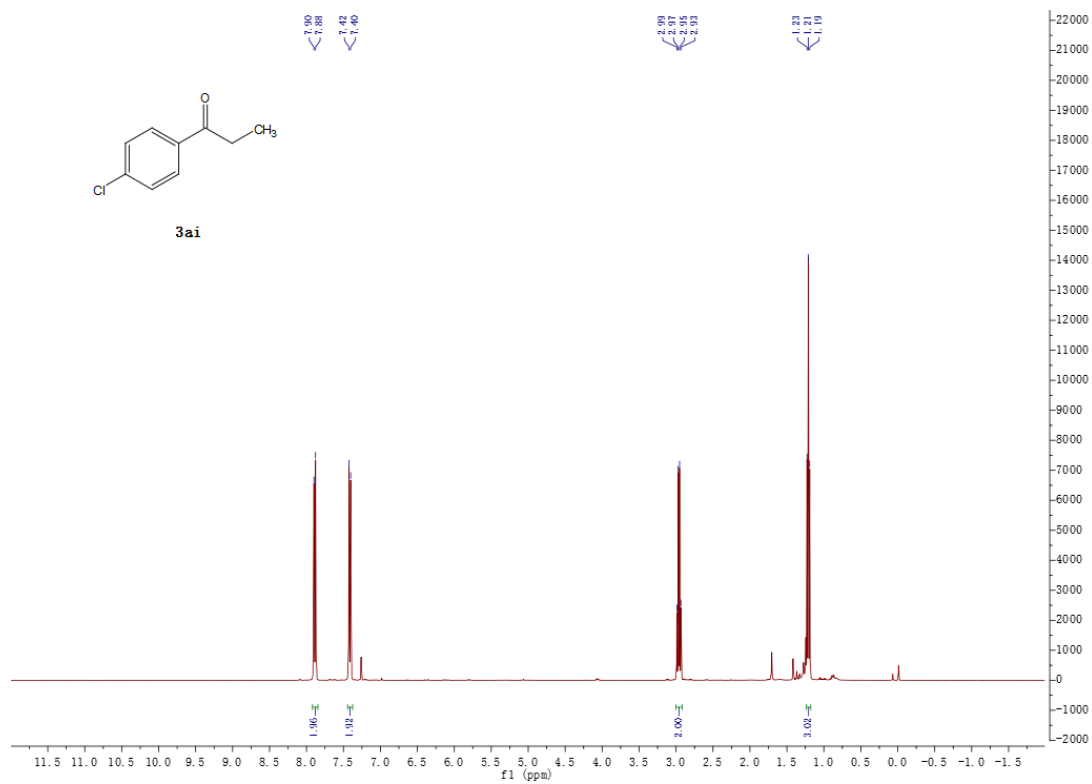



### <sup>13</sup>C NMR of 4a

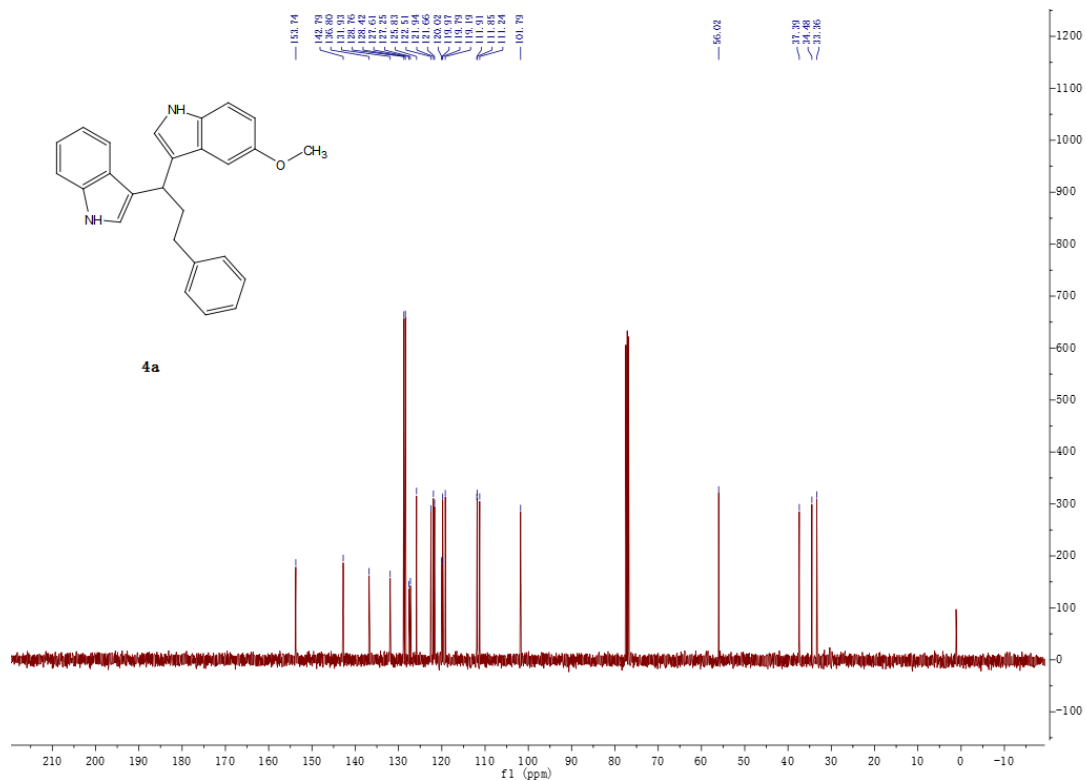

### <sup>1</sup>H NMR of 4b

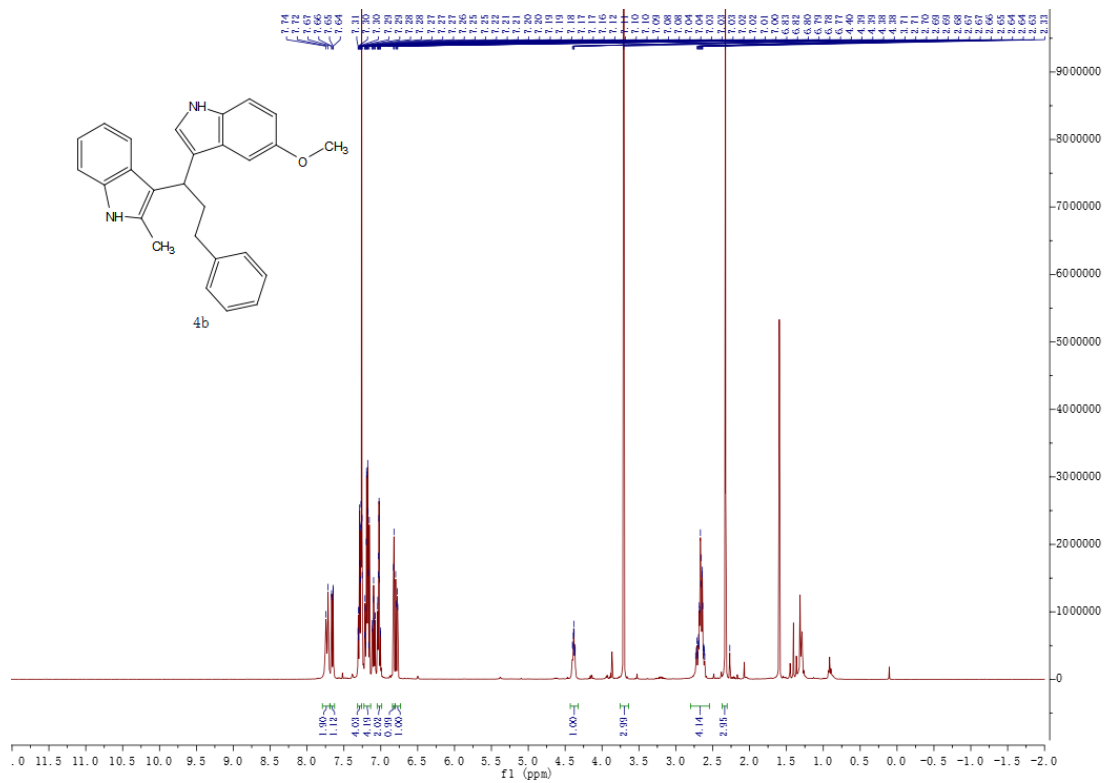

### <sup>13</sup>C NMR of 4b

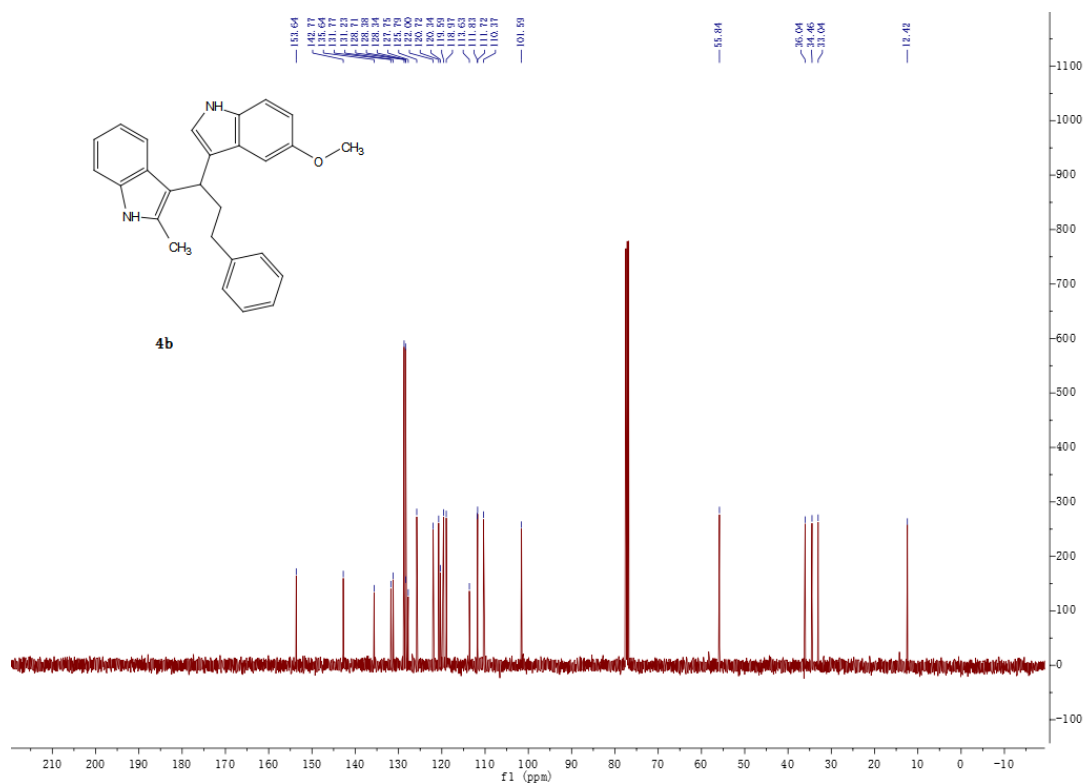

### <sup>1</sup>H NMR of 4c

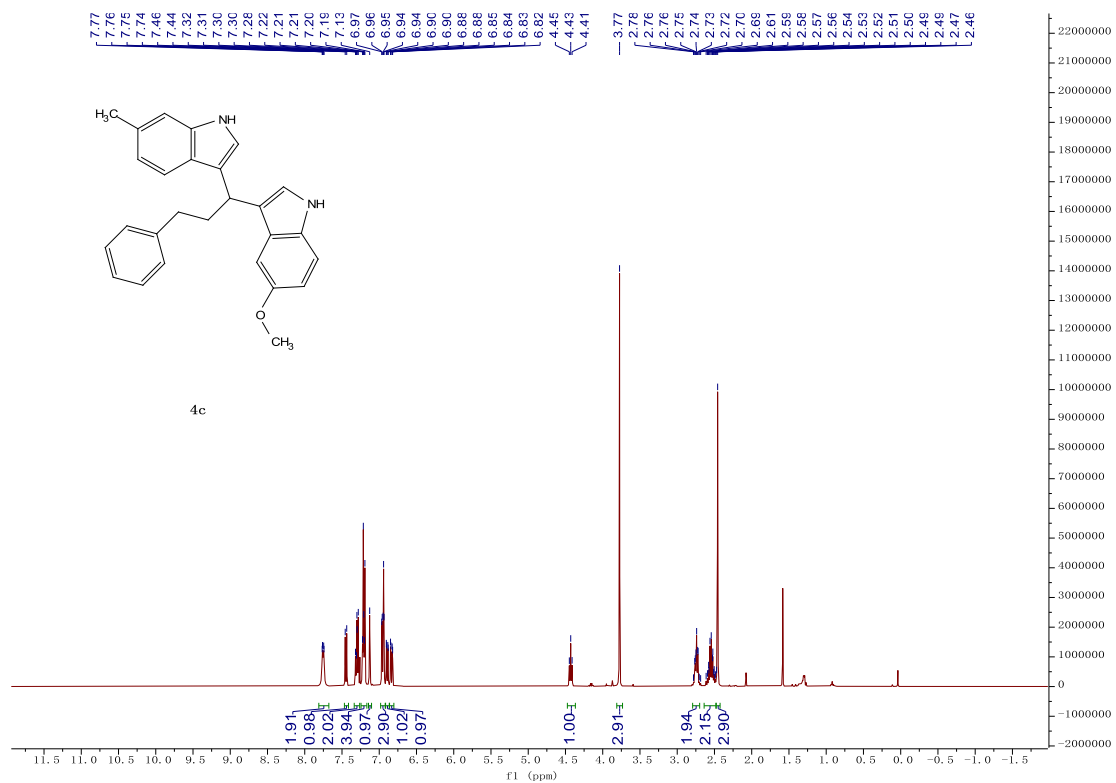

### $^{13}\text{C}$ NMR of 4c

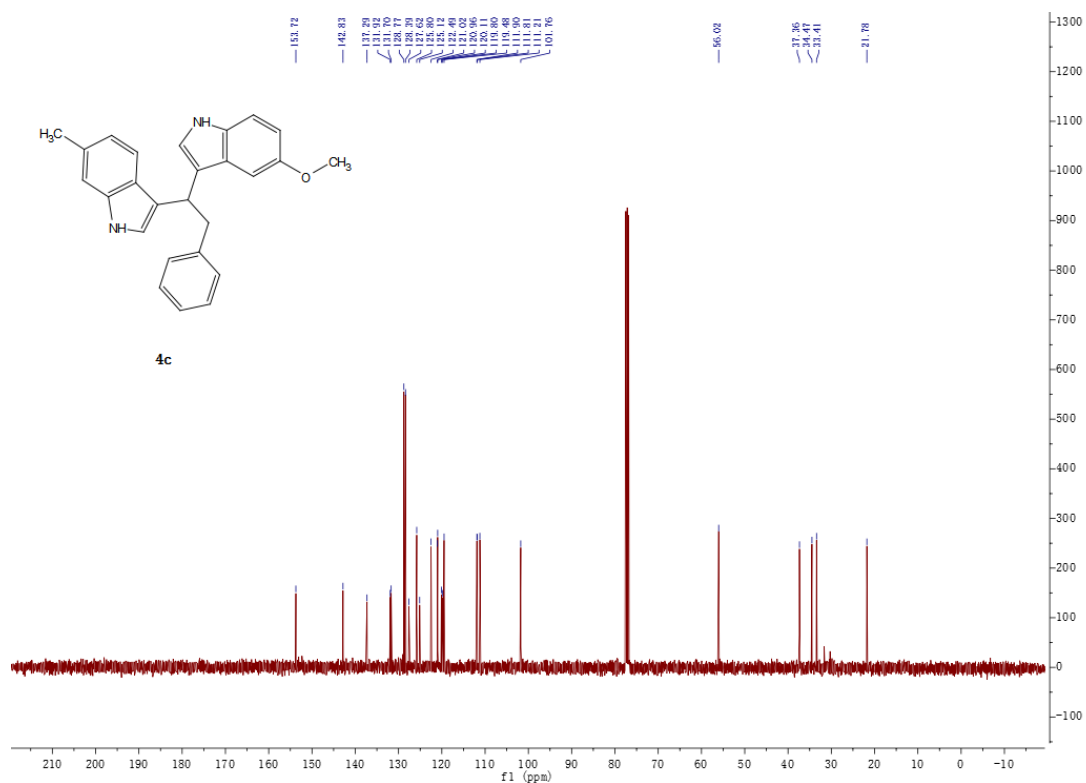

### $^1\text{H}$ NMR of 4d

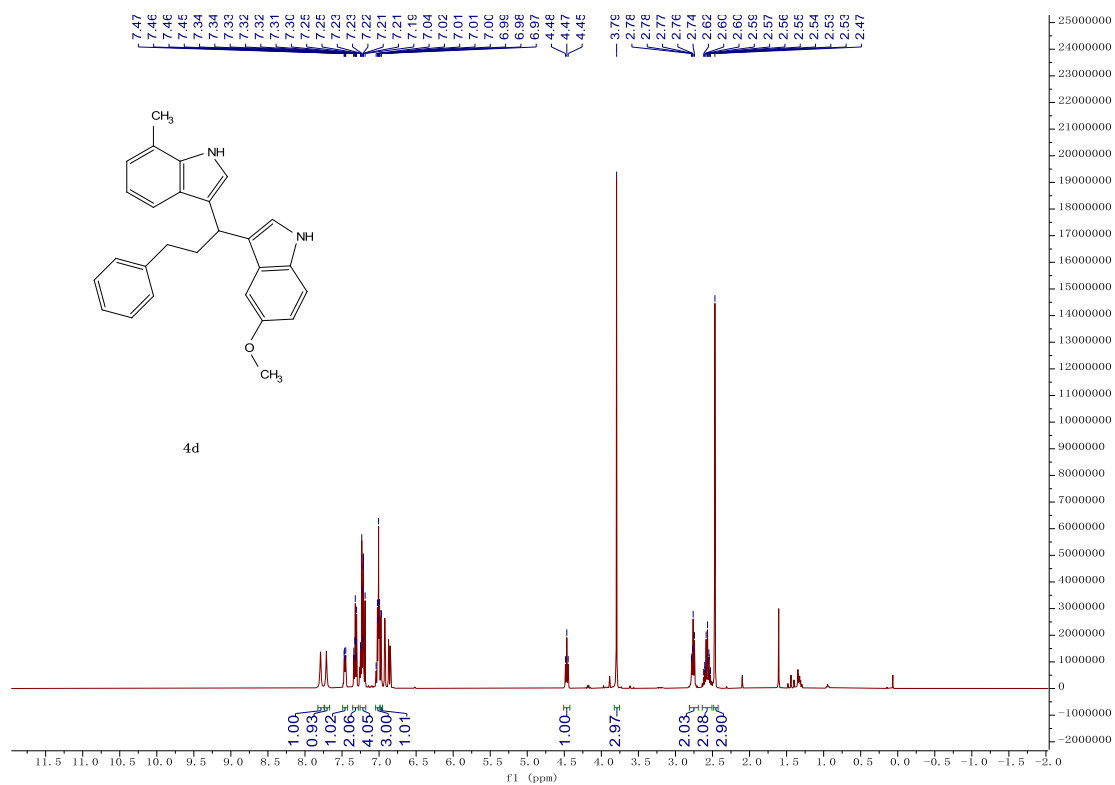

### <sup>13</sup>C NMR of 4d

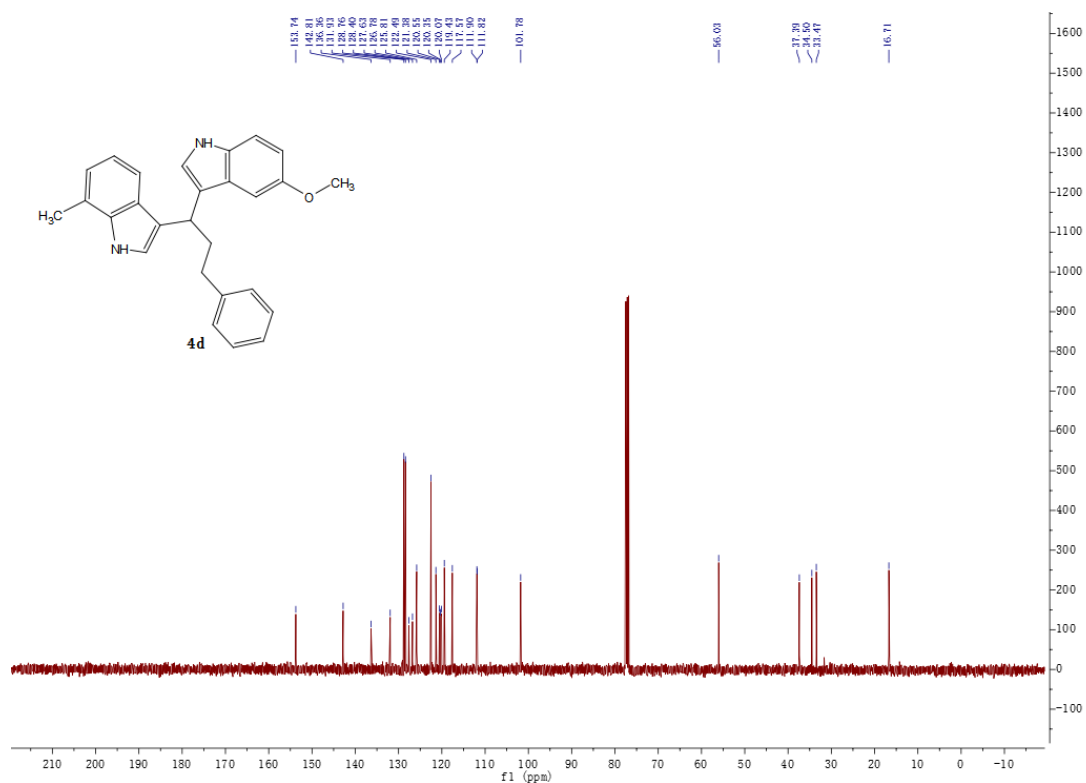

### <sup>1</sup>H NMR of 5a

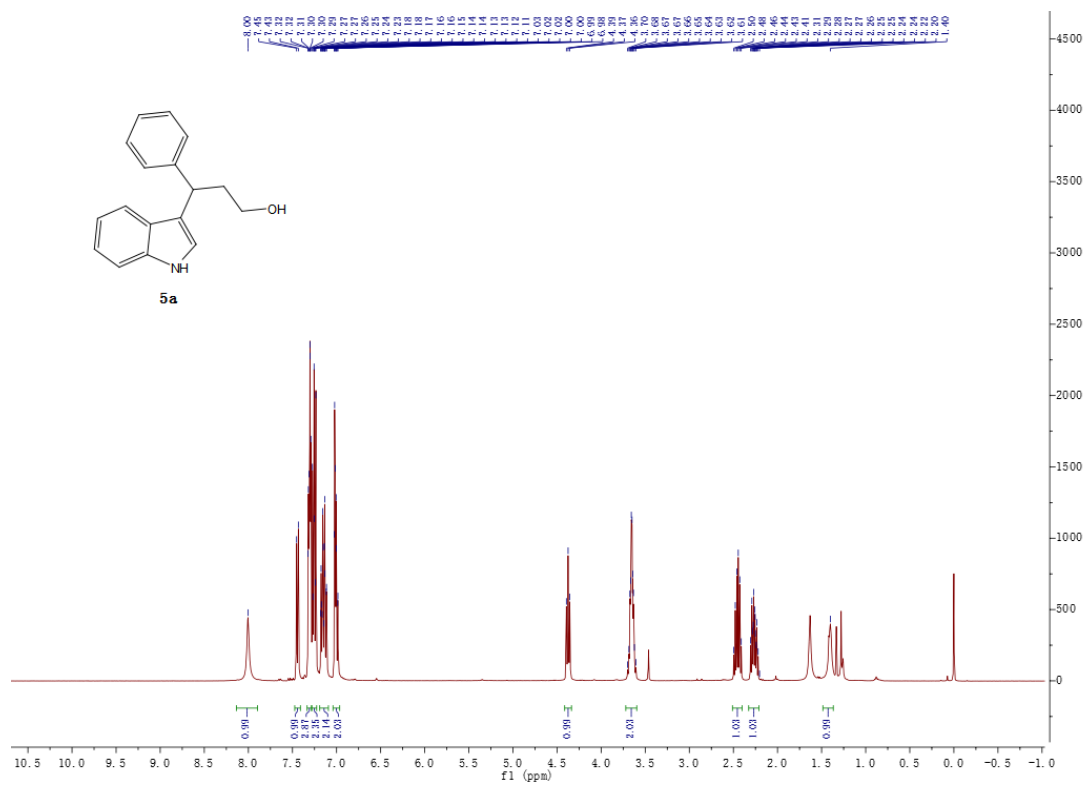

### $^{13}\text{C}$ NMR of 5a

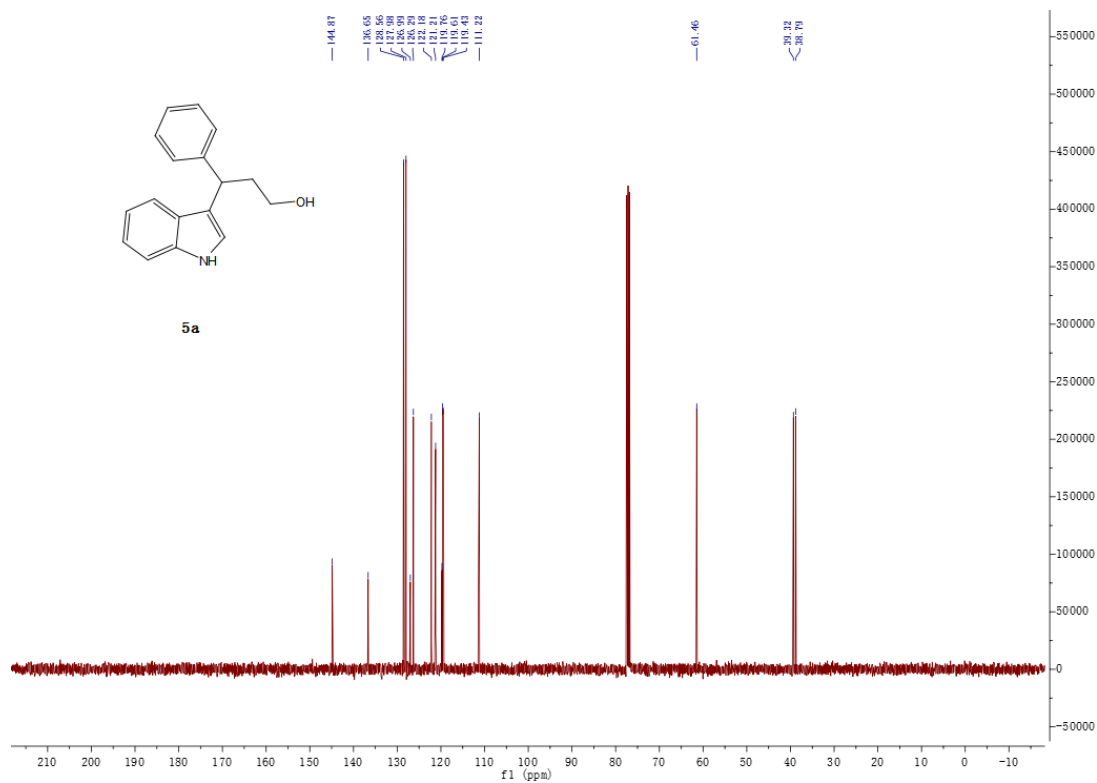

### $^1\text{H}$ NMR of 5b

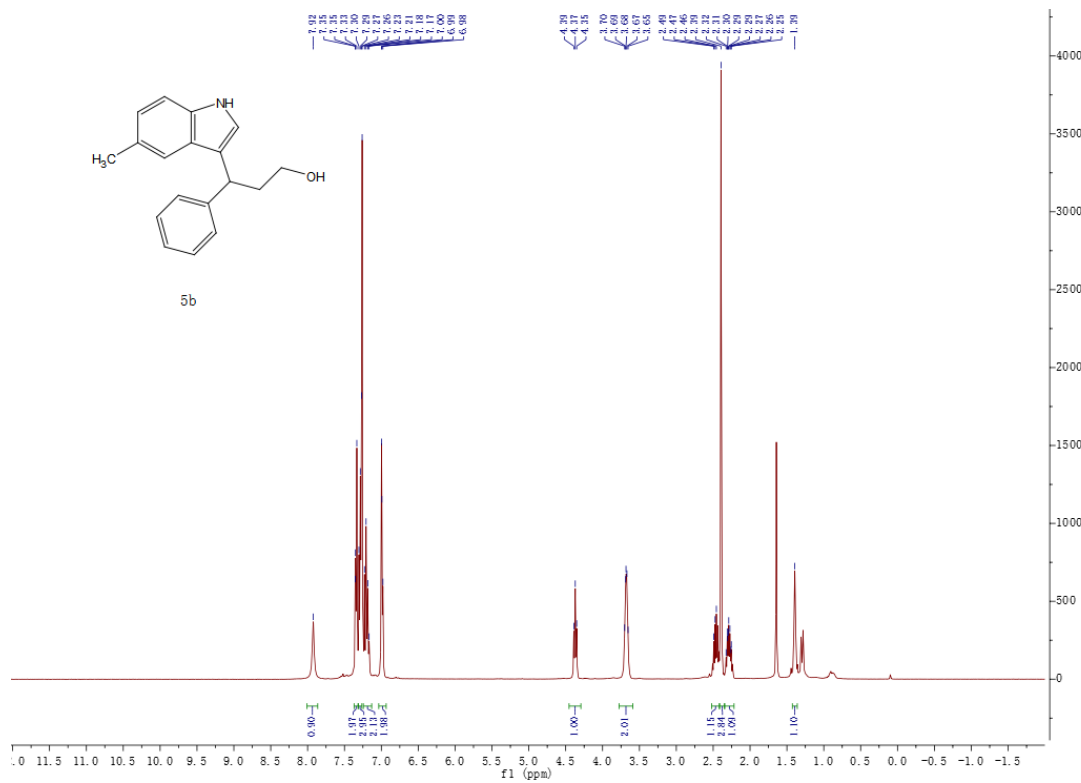



<sup>13</sup>C NMR of **5b**

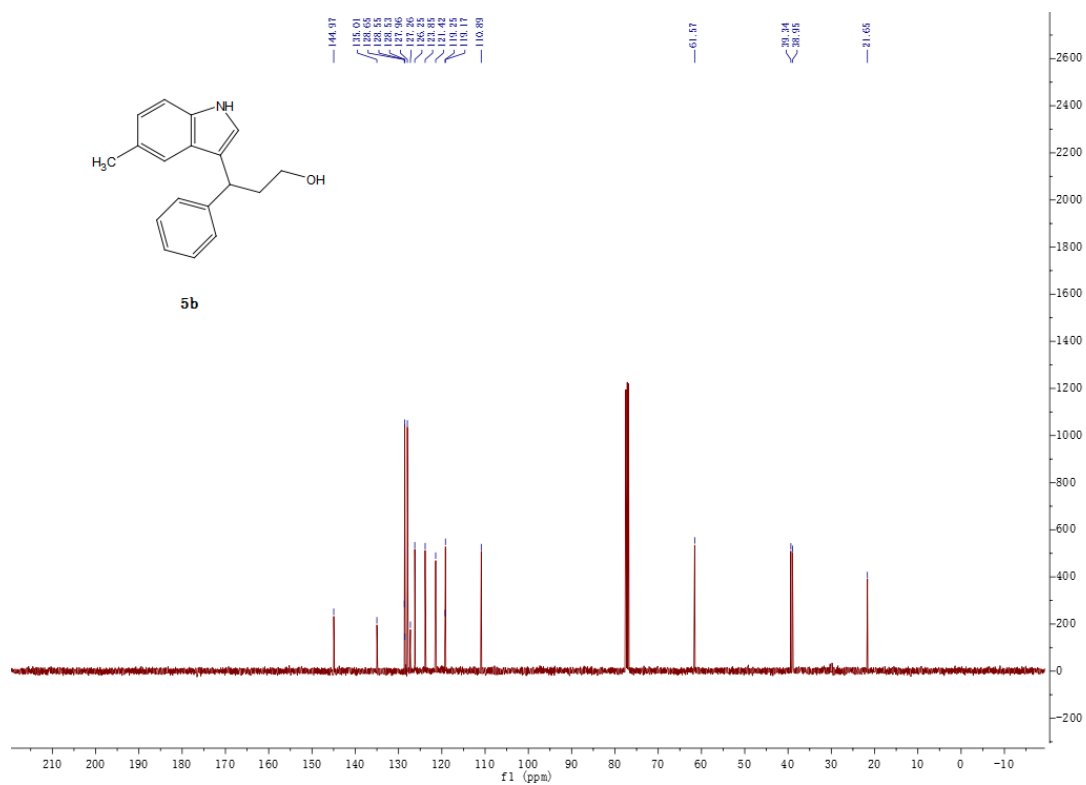

<sup>1</sup>H NMR of **5c**

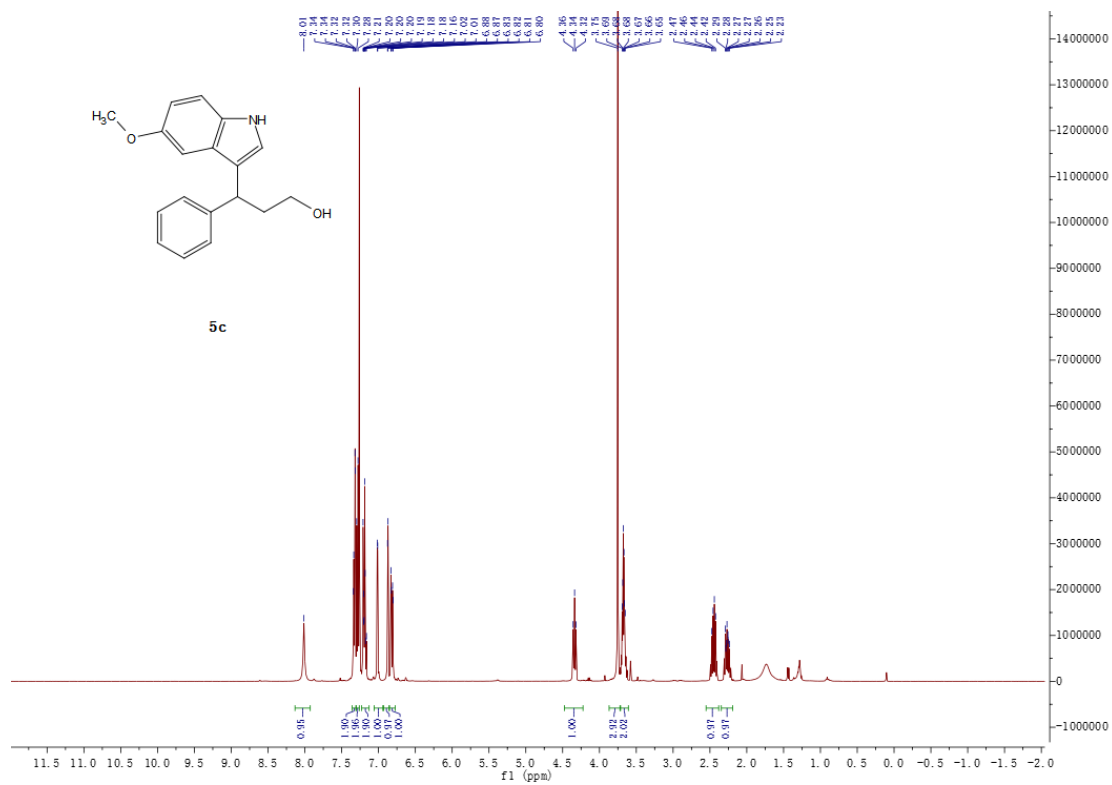

### <sup>13</sup>C NMR of 5c

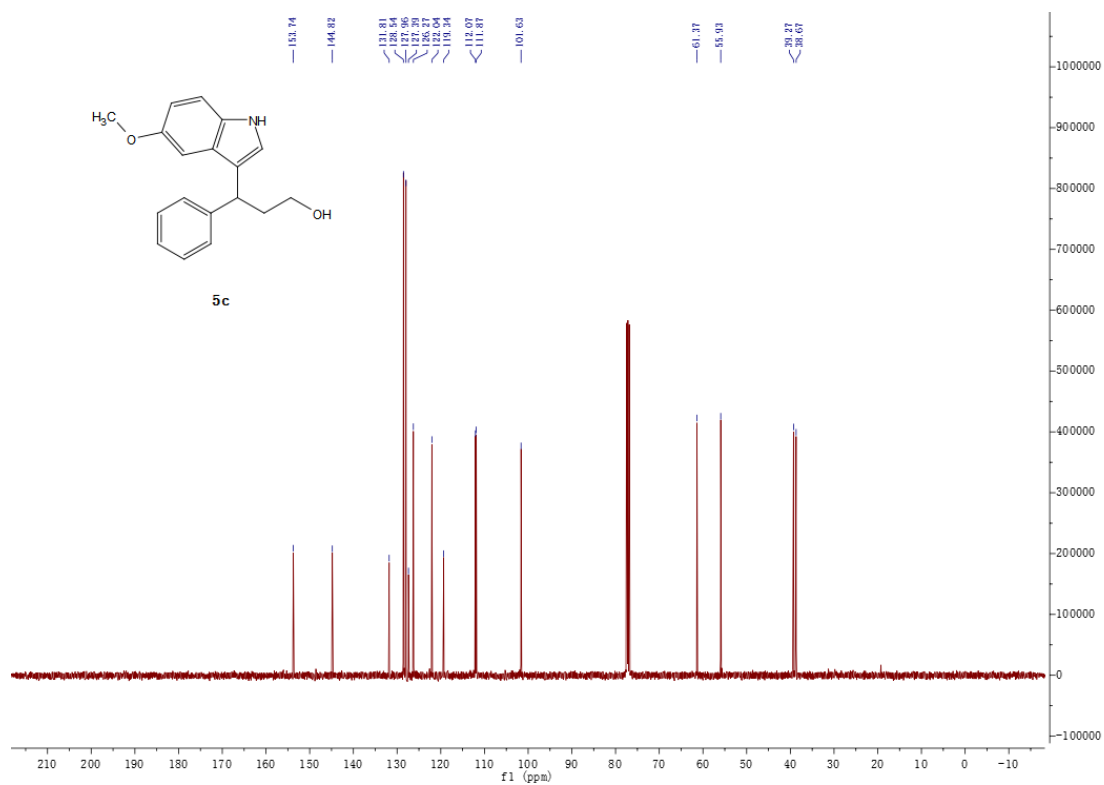

### <sup>1</sup>H NMR of 5d

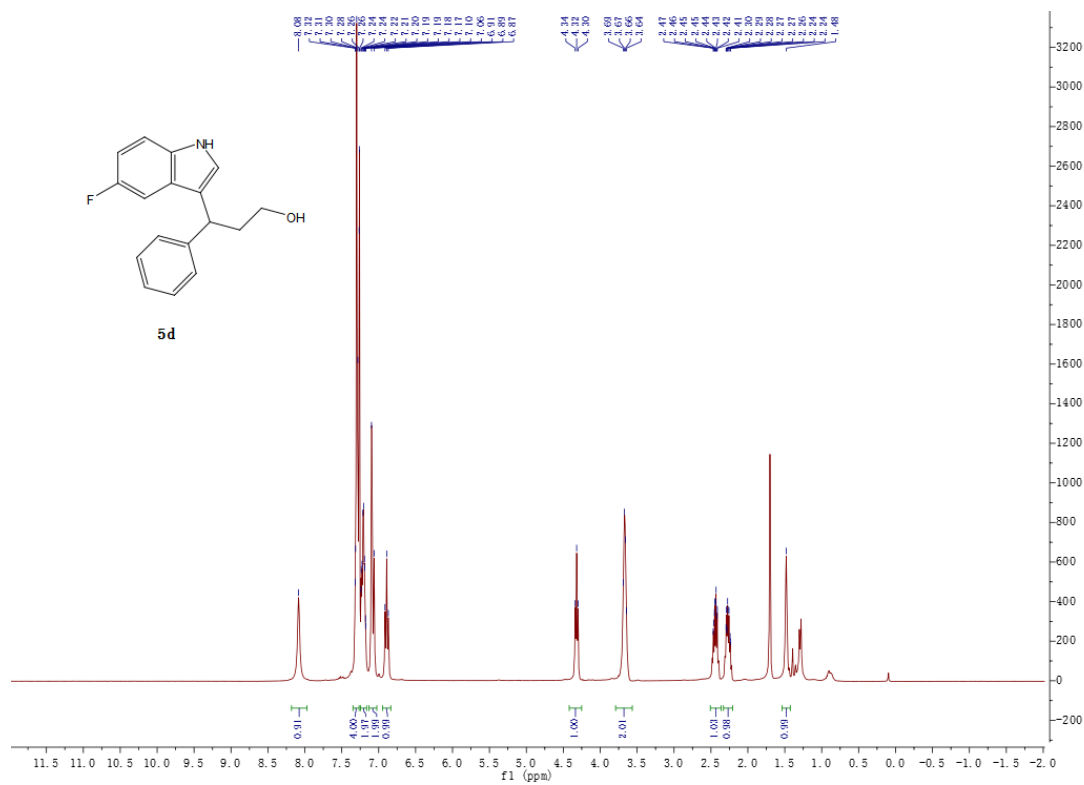

### <sup>19</sup>F NMR of 5d

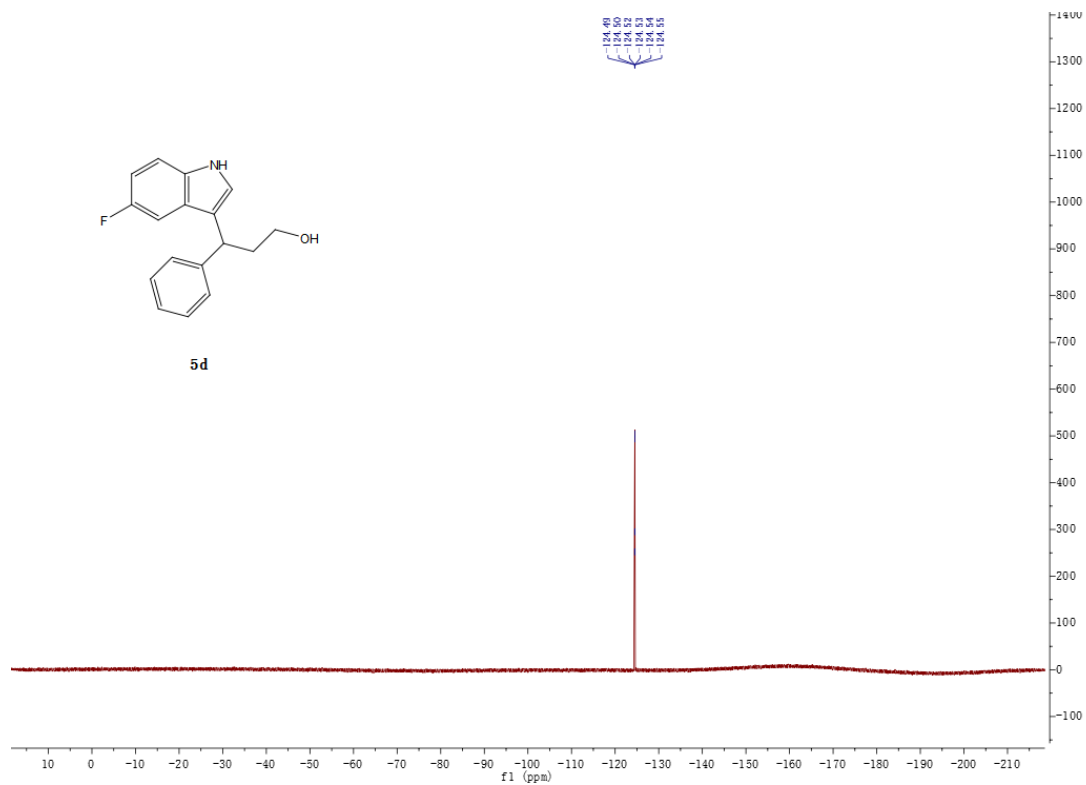

### <sup>13</sup>C NMR of 5d

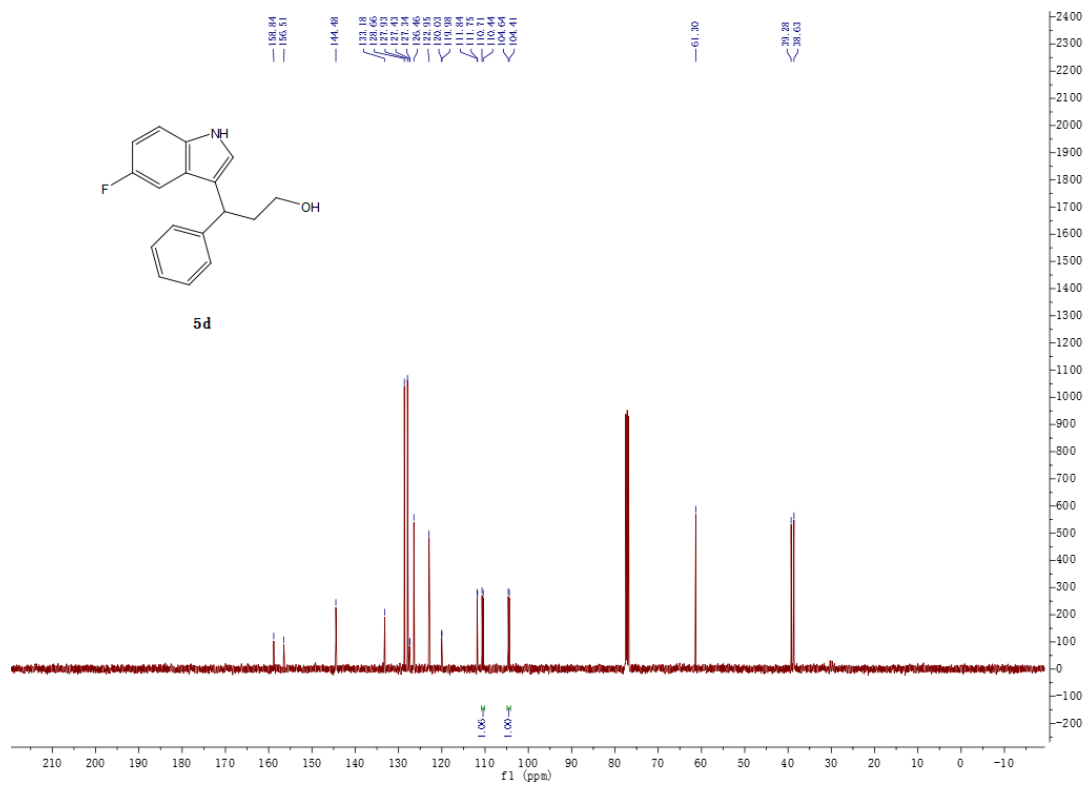

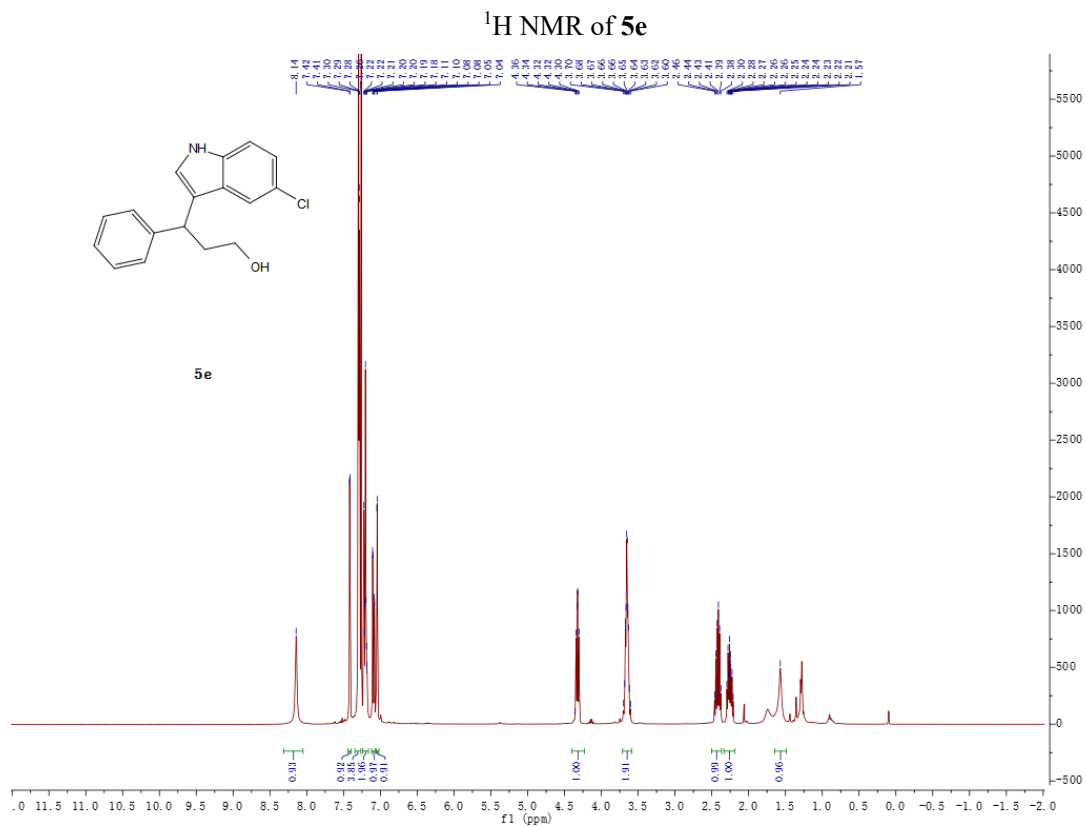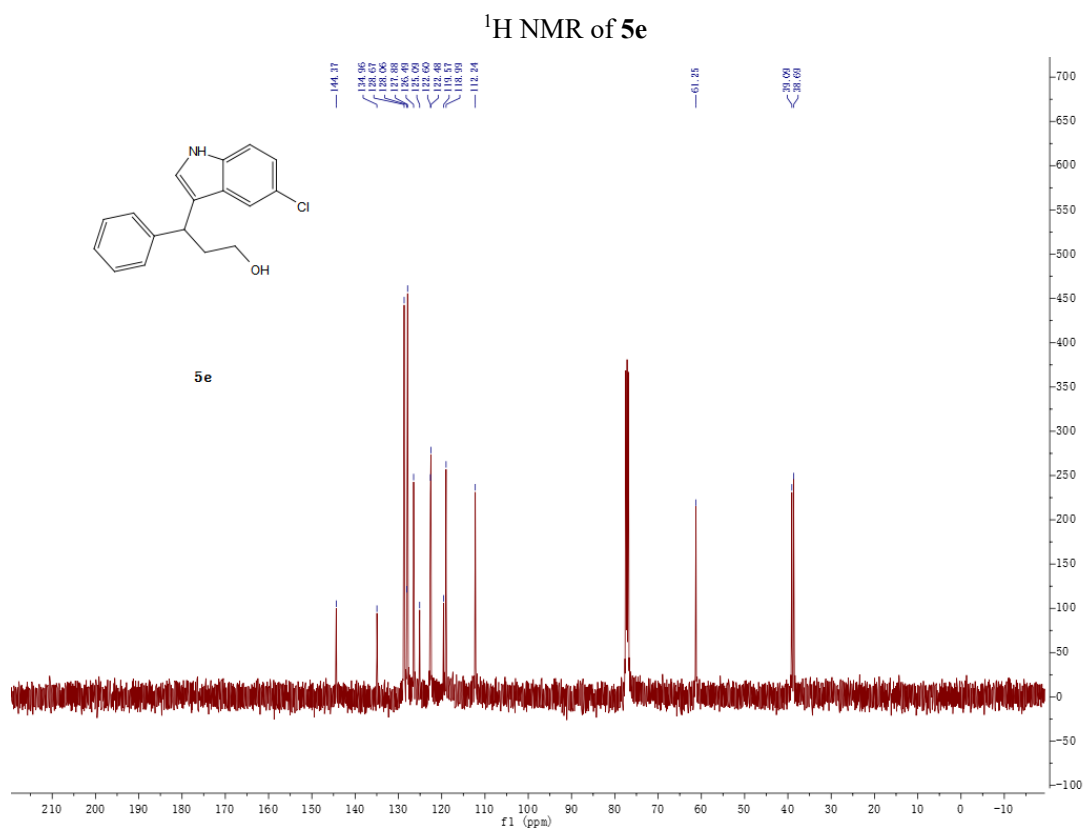

$^1\text{H NMR}$  of **5f**

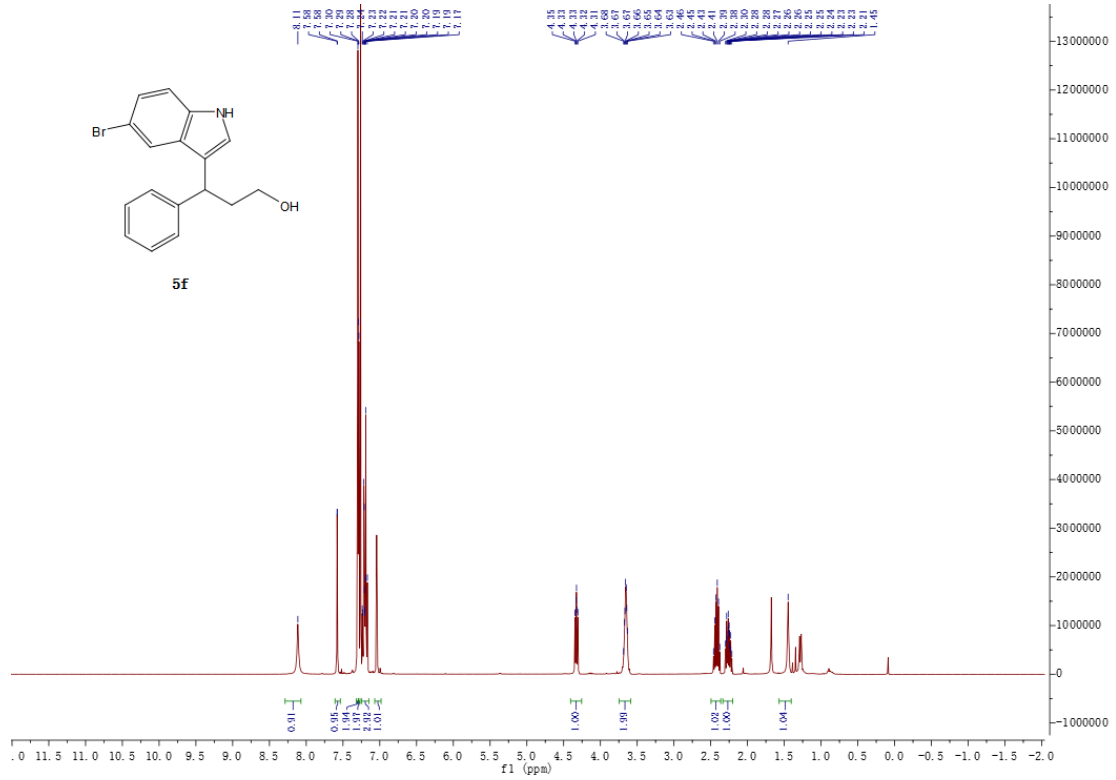

$^{13}\text{C NMR}$  of **5f**

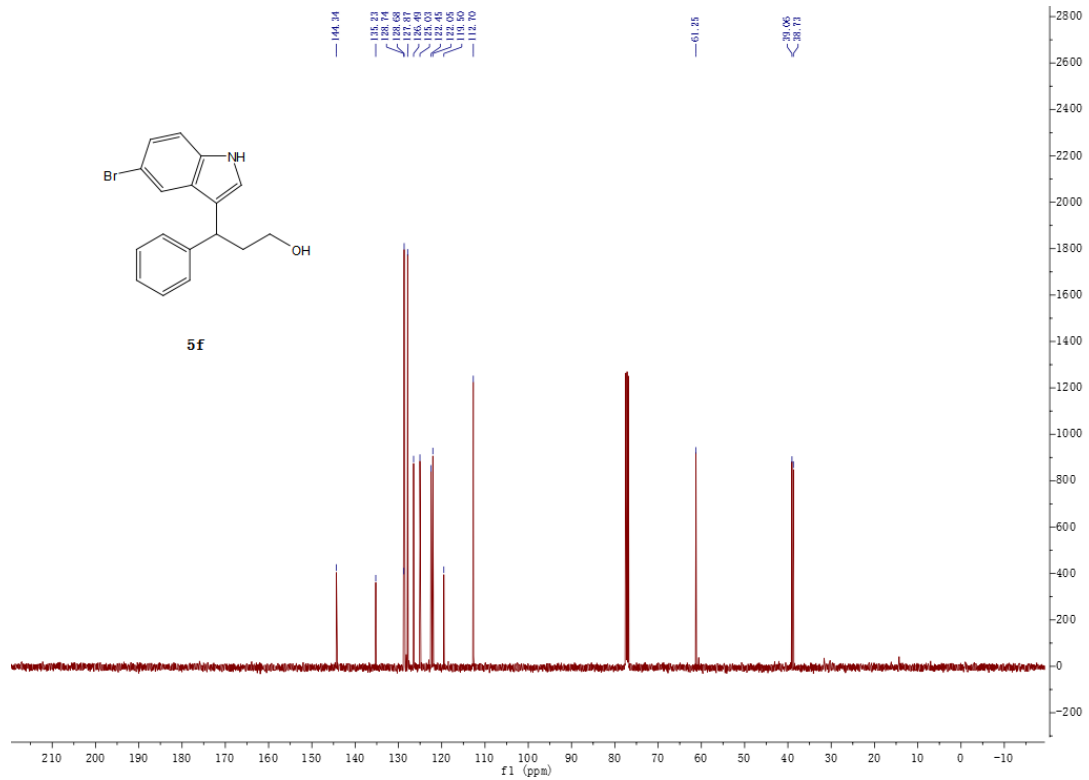

### $^1\text{H}$ NMR of **5g**

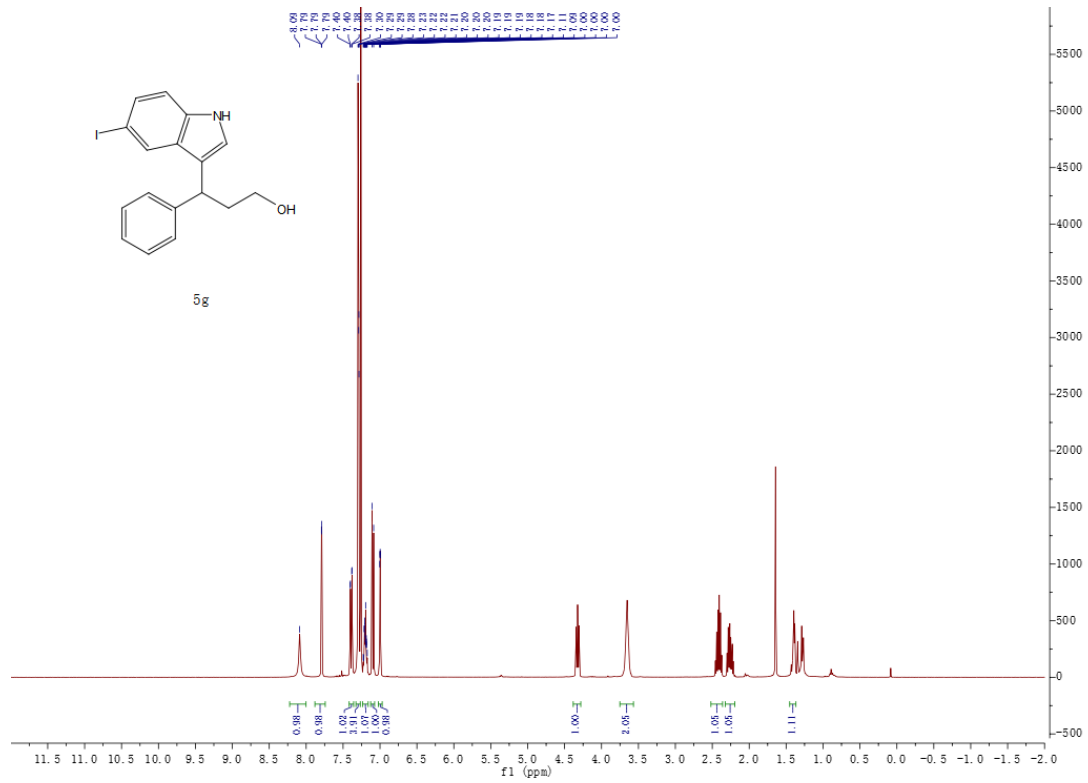

### $^{13}\text{C}$ NMR of **5g**

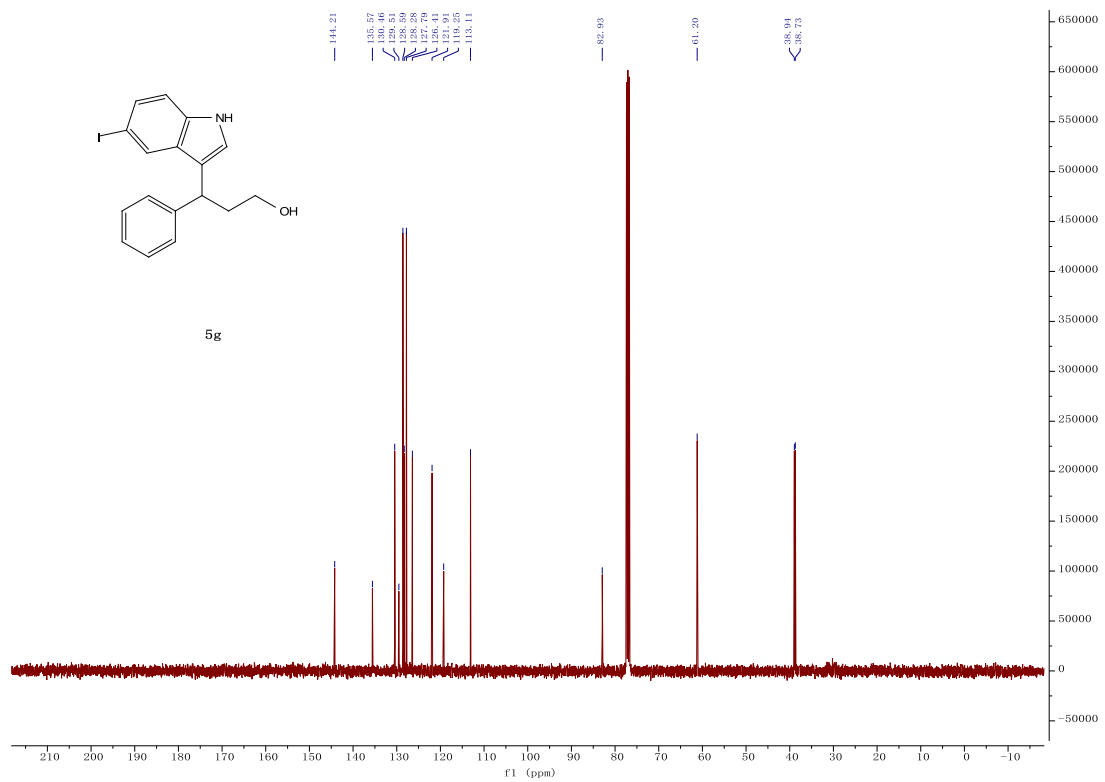

### $^1\text{H}$ NMR of **5i**

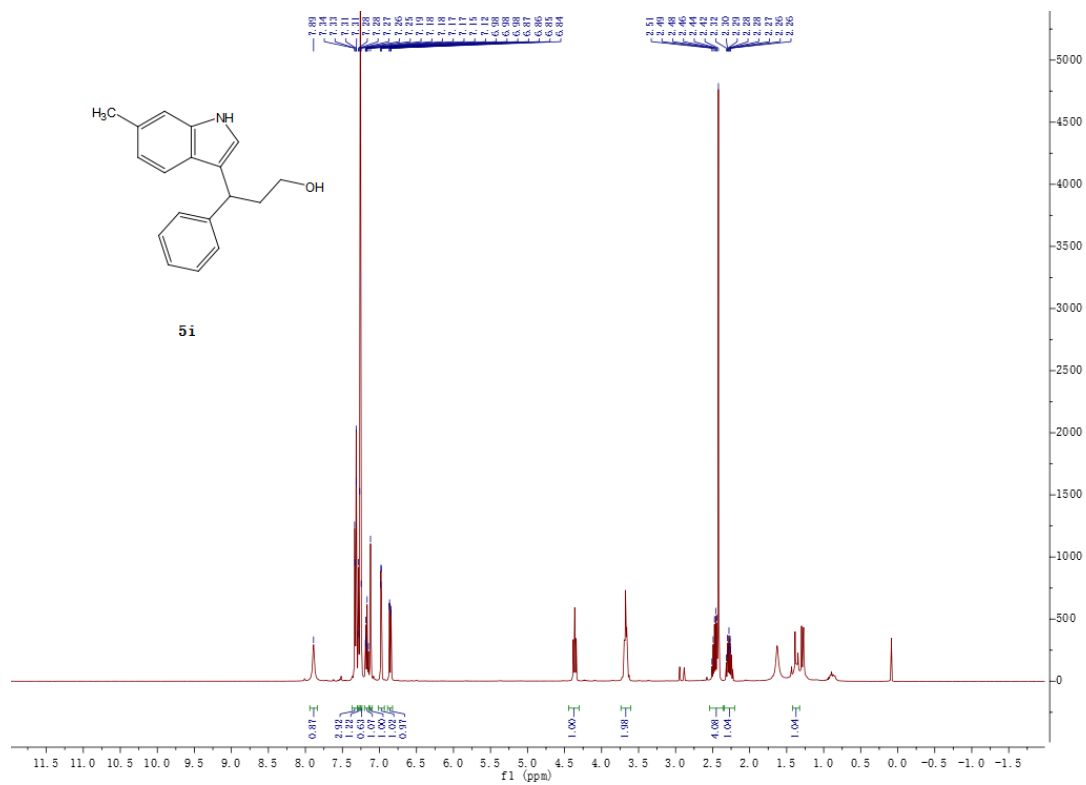

### $^{13}\text{C}$ NMR of **5i**

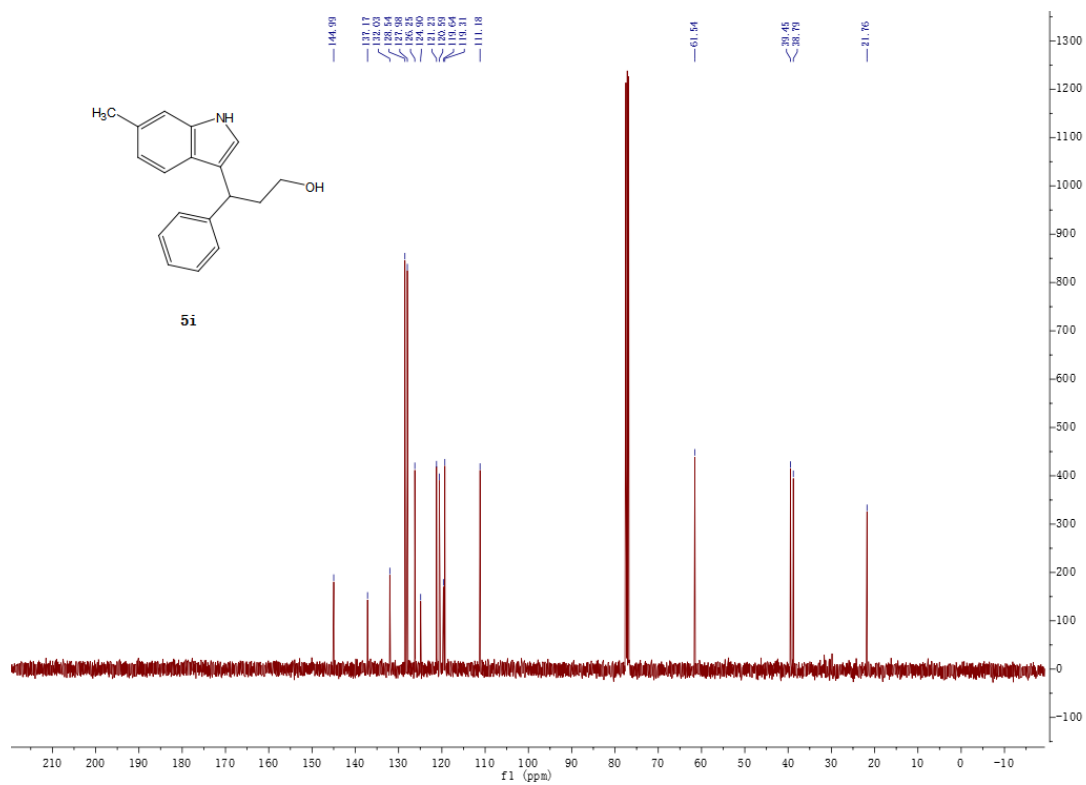

### <sup>1</sup>H NMR of 5j

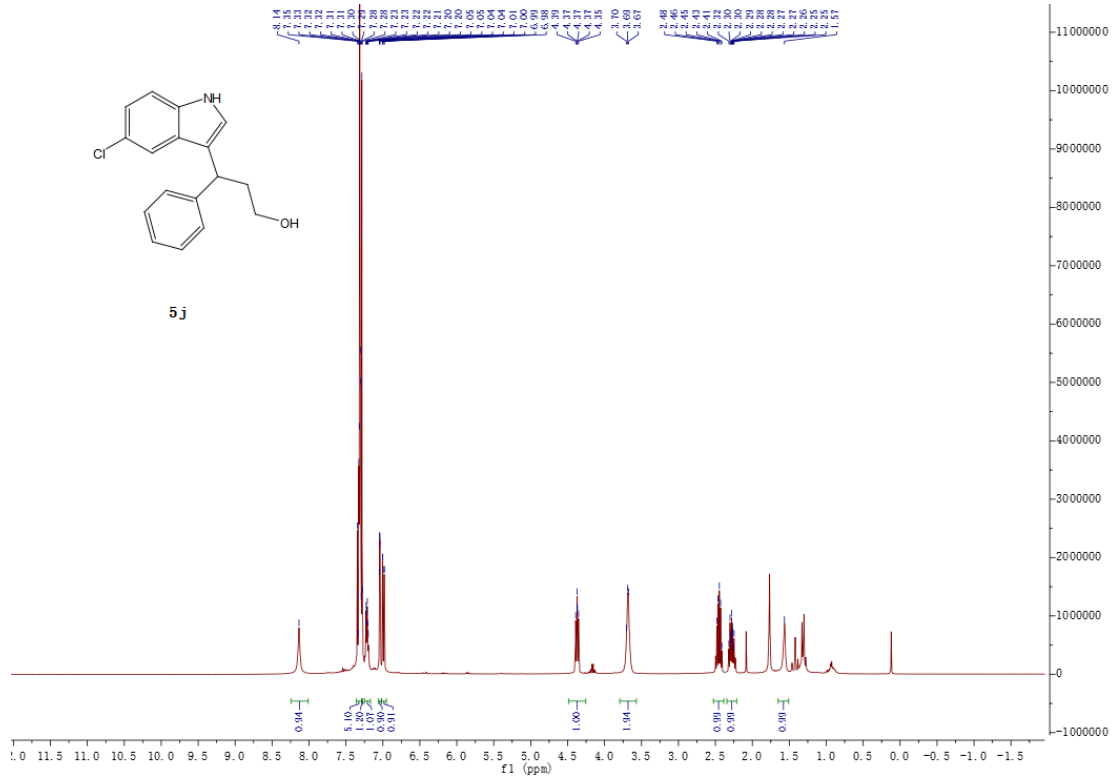

### <sup>13</sup>C NMR of 5j

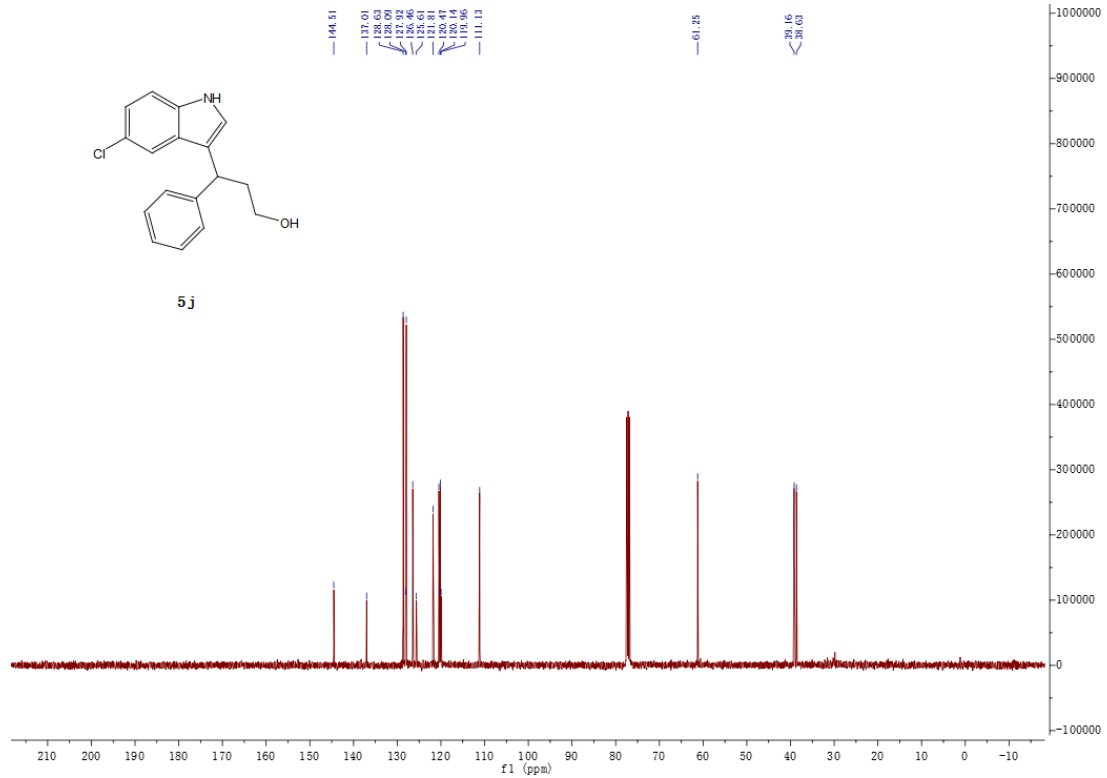



### <sup>1</sup>H NMR of 5k

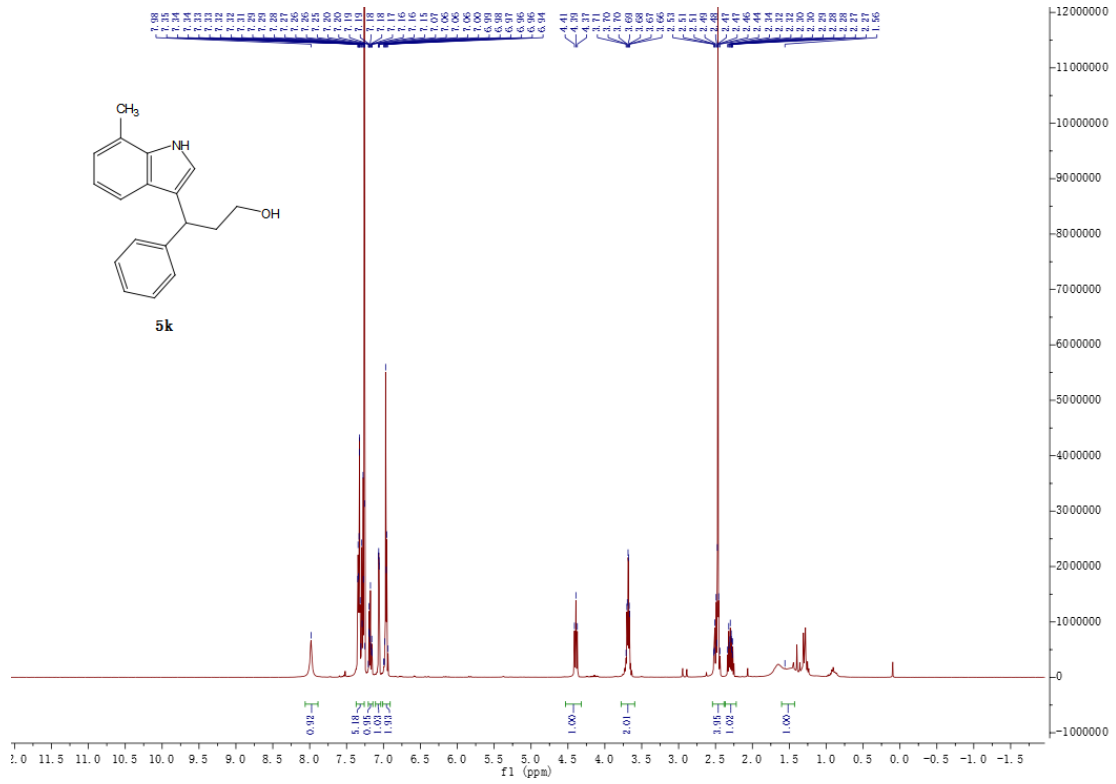

### <sup>13</sup>C NMR of 5k

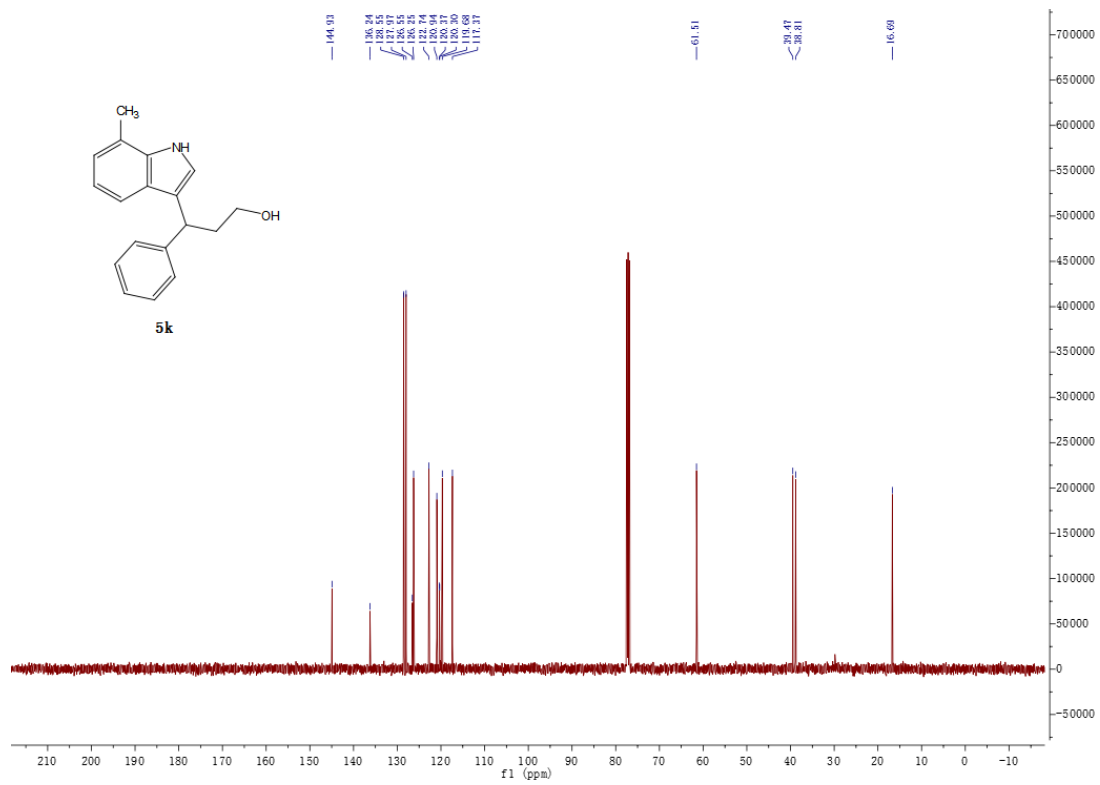

### <sup>1</sup>H NMR of 51

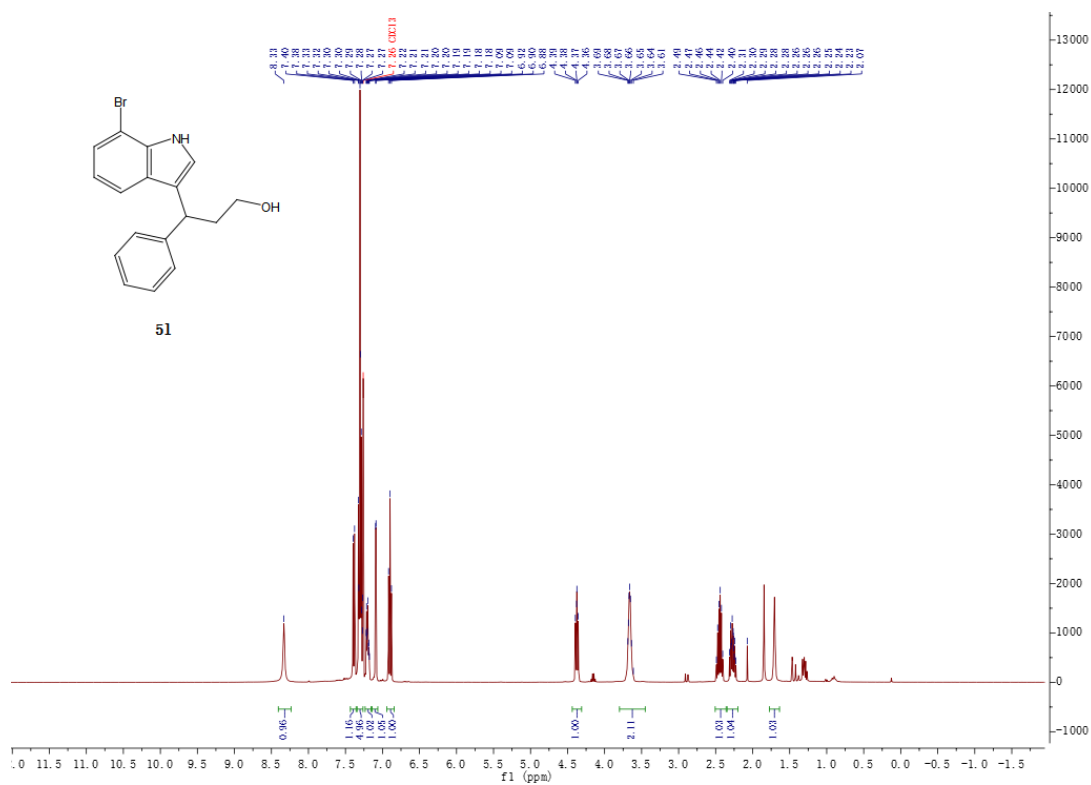

### <sup>13</sup>C NMR of 51

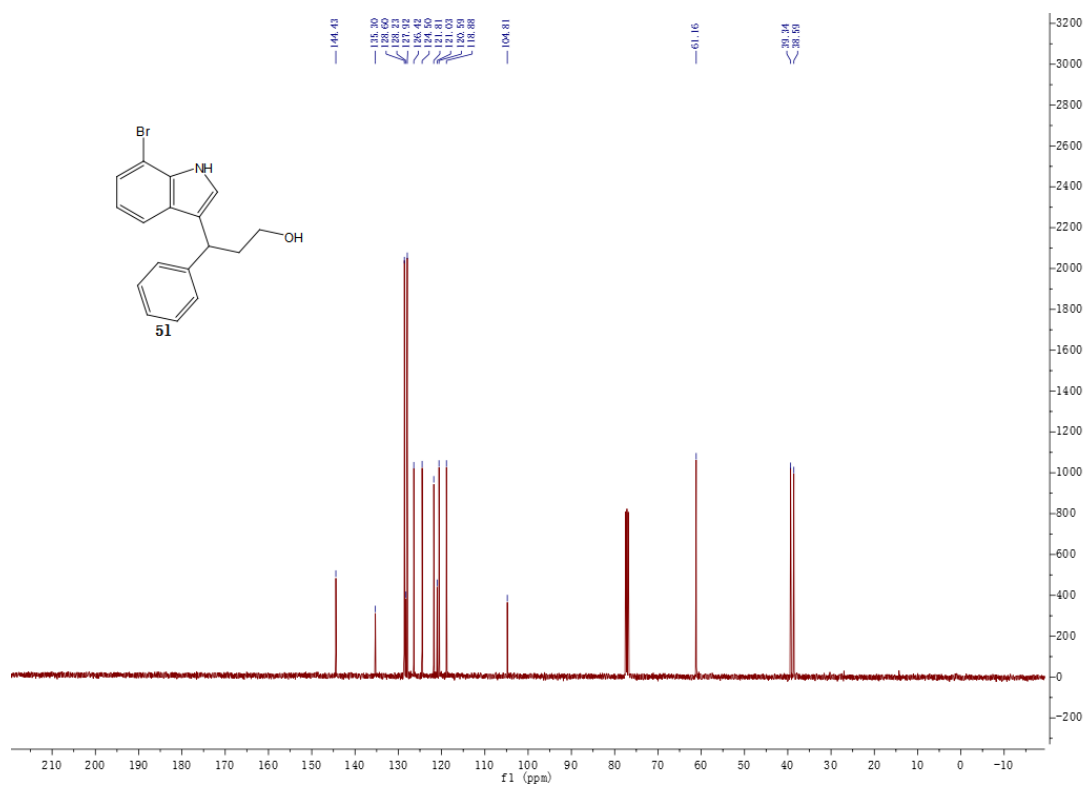

### <sup>1</sup>H NMR of 5m

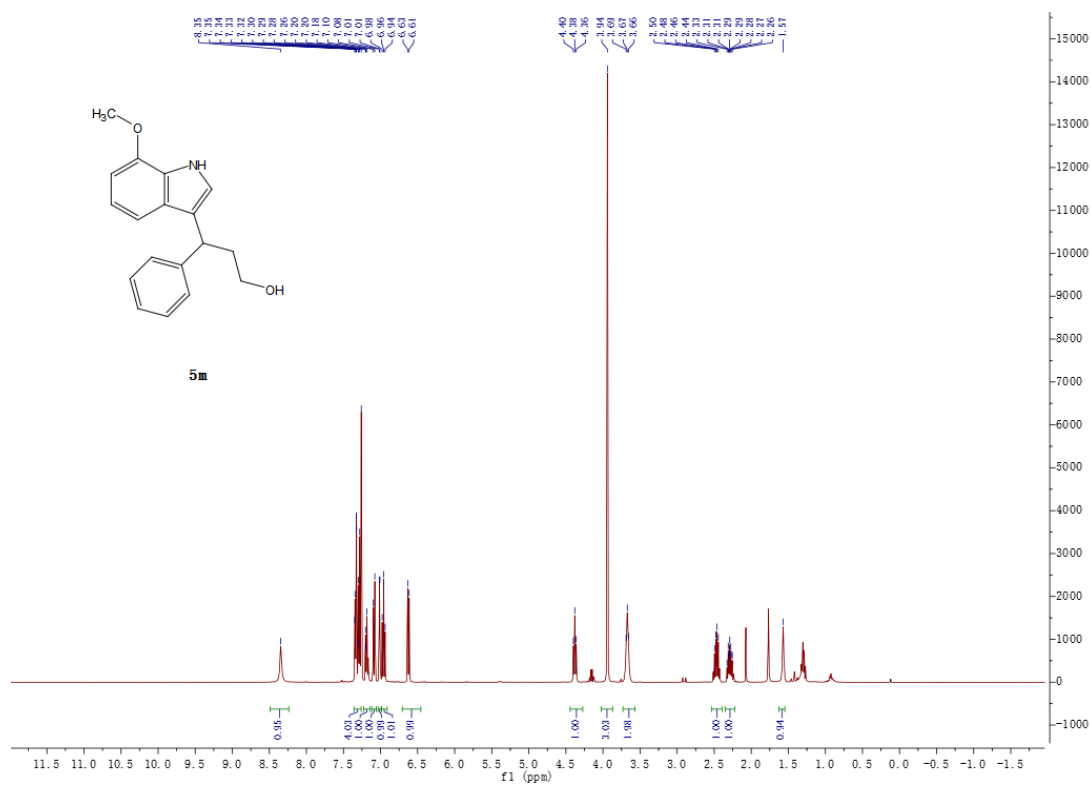

### <sup>13</sup>C NMR of 5m

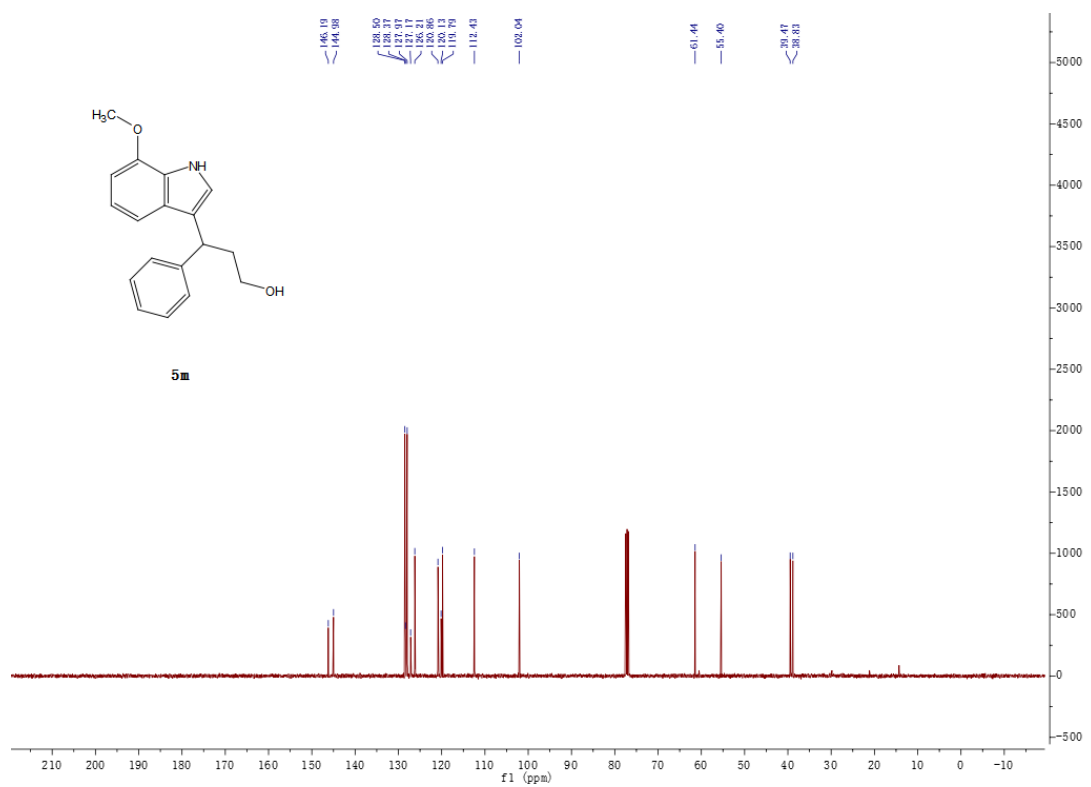

### <sup>1</sup>H NMR of 5n

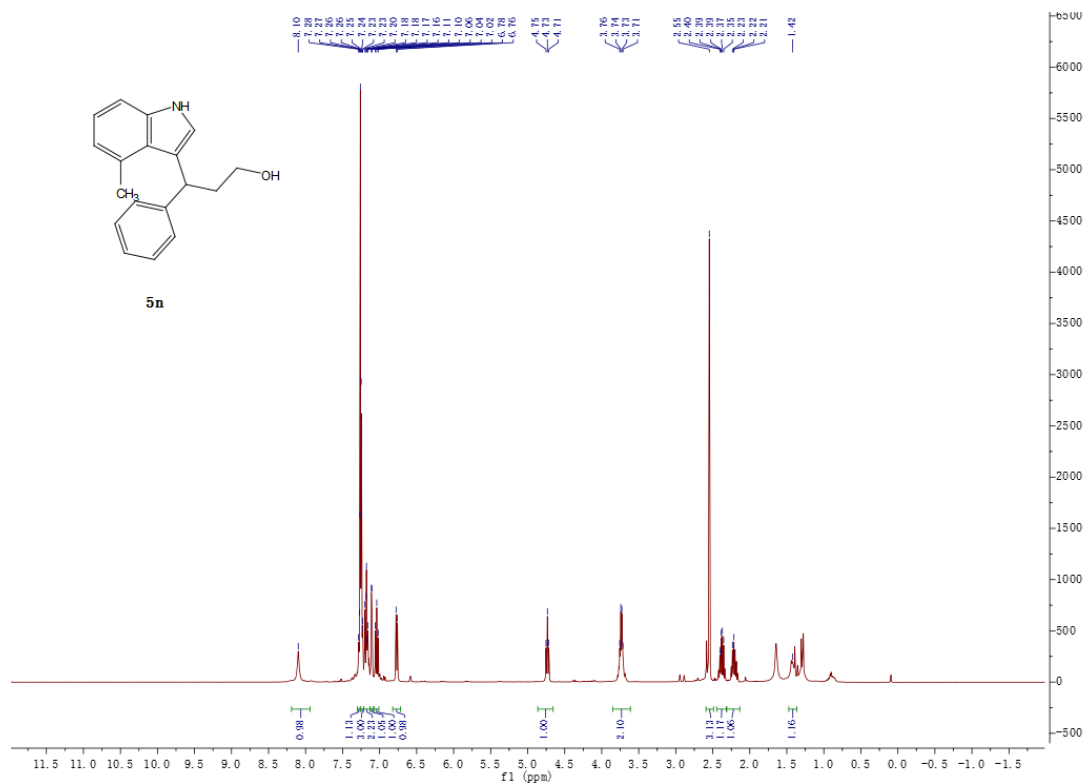

### <sup>13</sup>C NMR of 5n

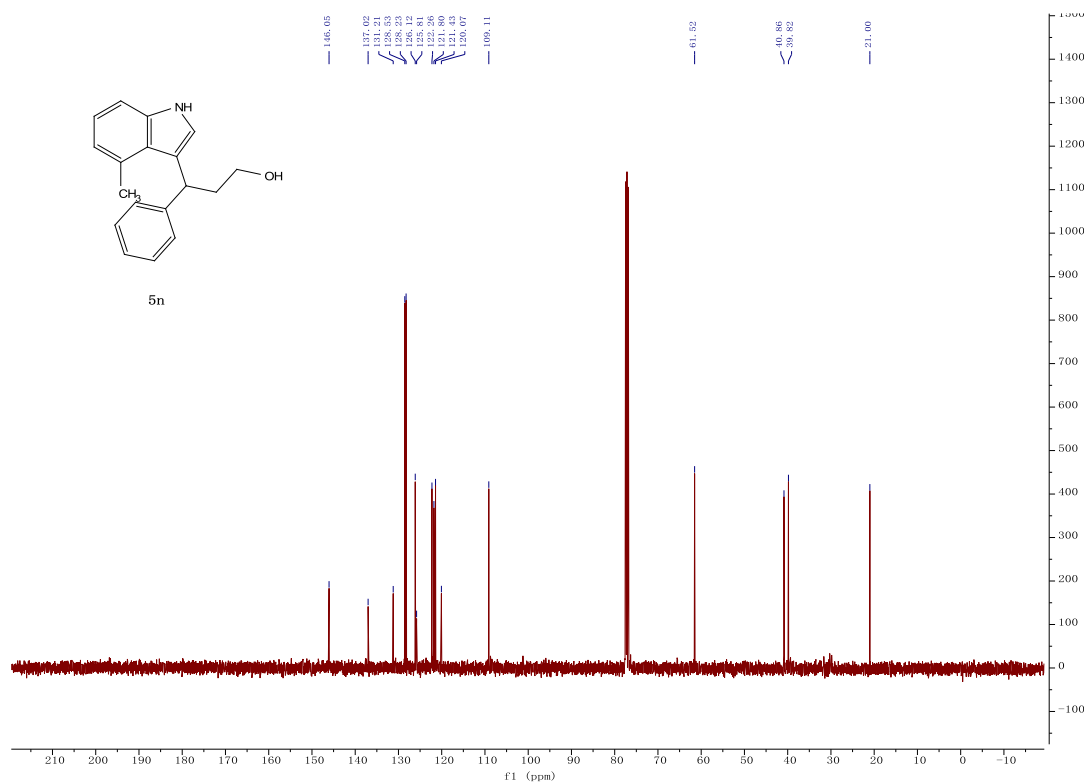

### <sup>1</sup>H NMR of **5o**

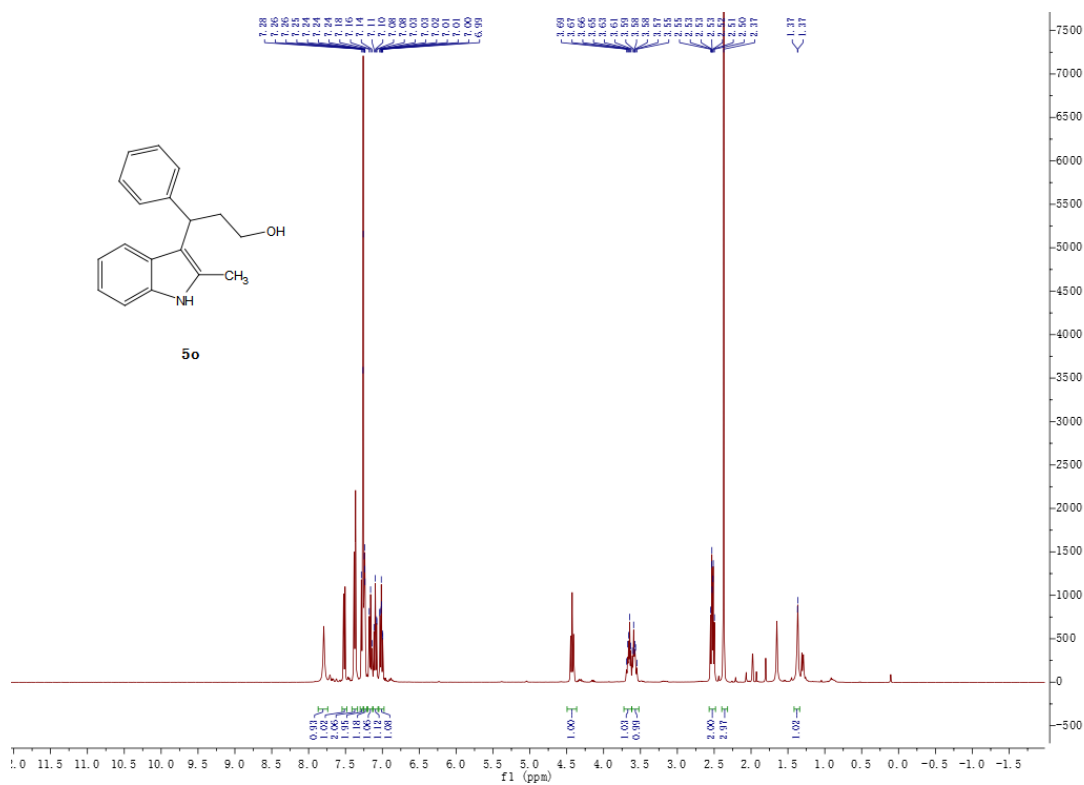

### <sup>13</sup>C NMR of **5o**

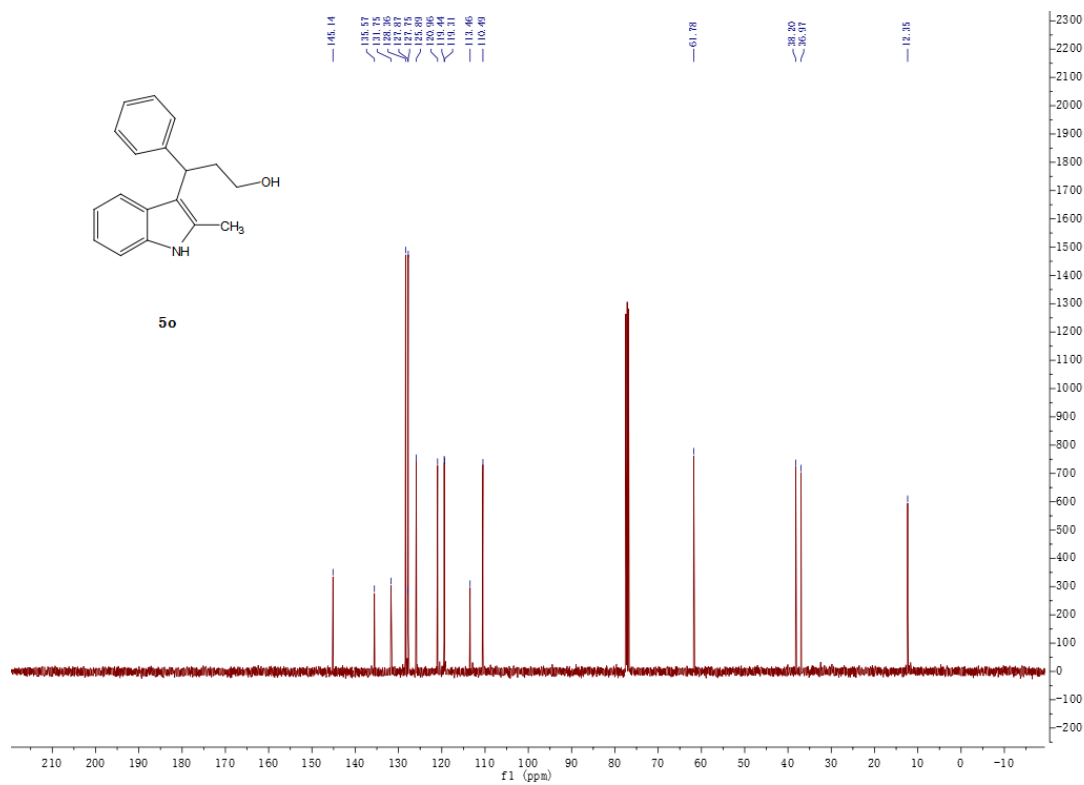

### <sup>1</sup>H NMR of 5q

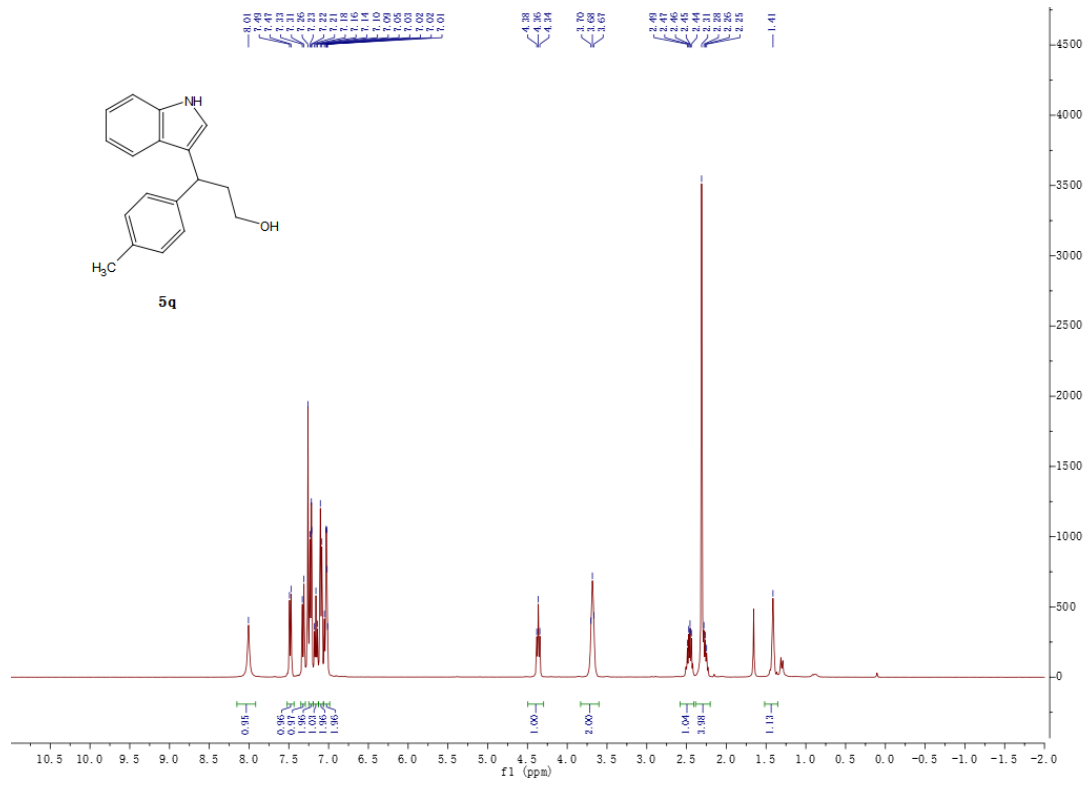

### <sup>13</sup>C NMR of 5q

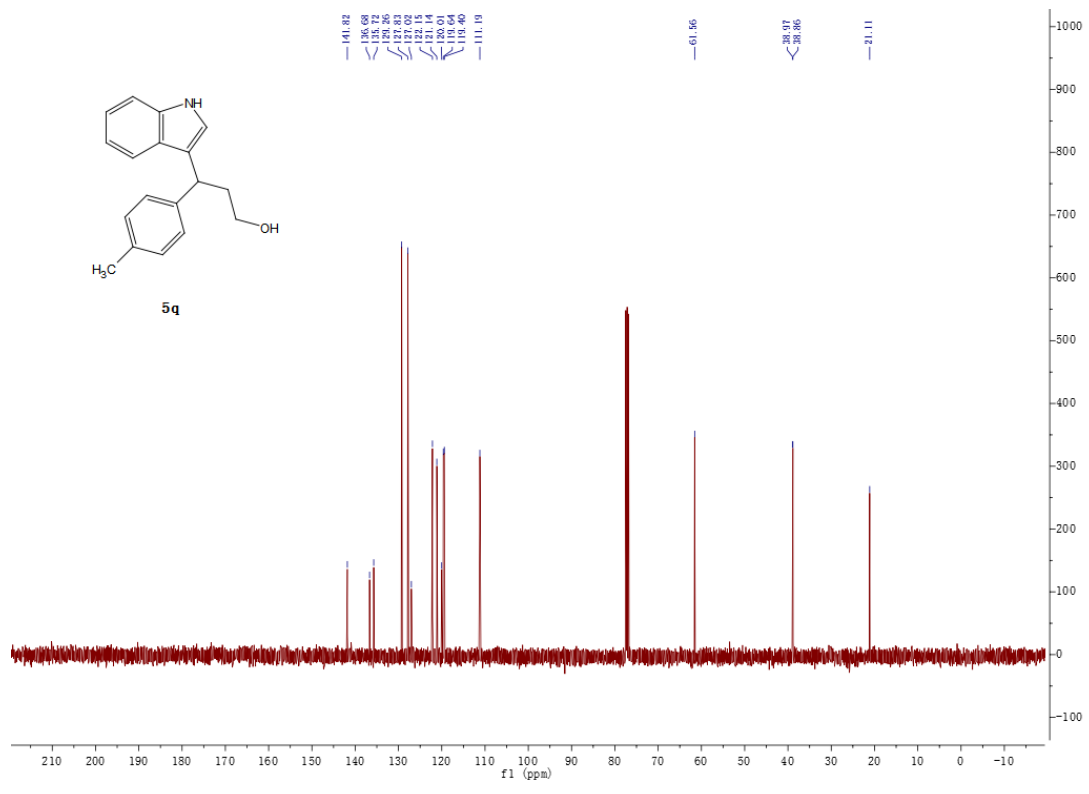

### <sup>1</sup>H NMR of 5r

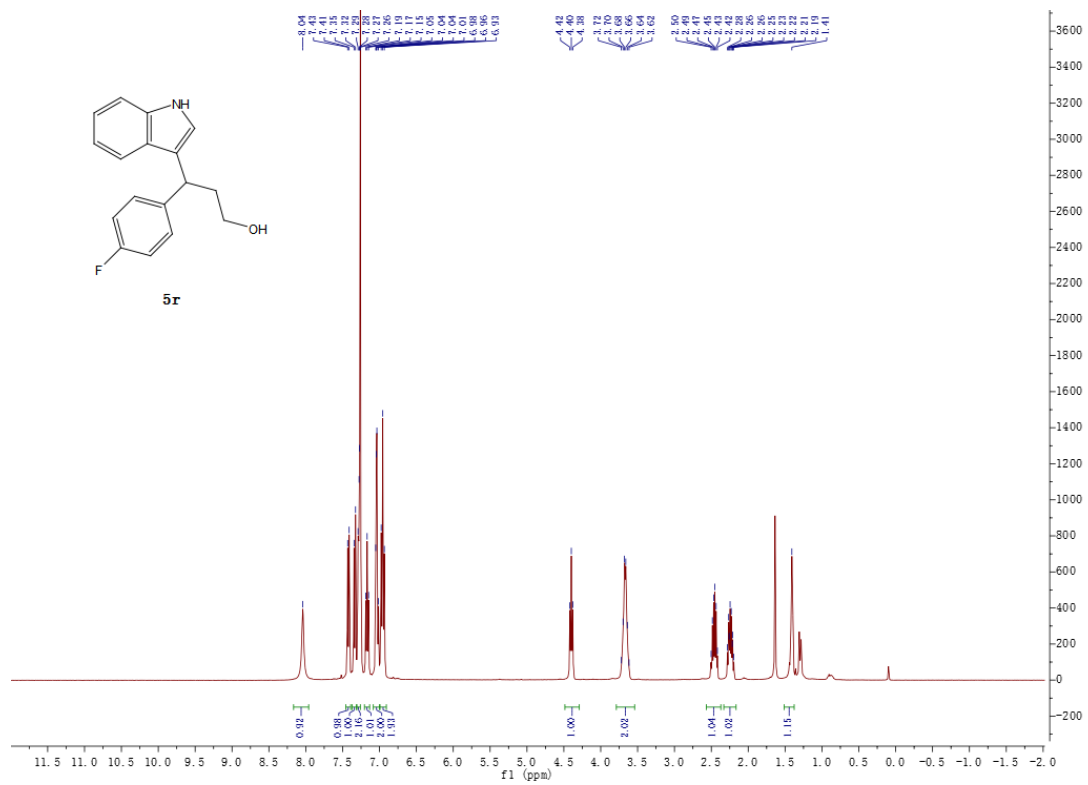

### <sup>19</sup>F NMR of 5r

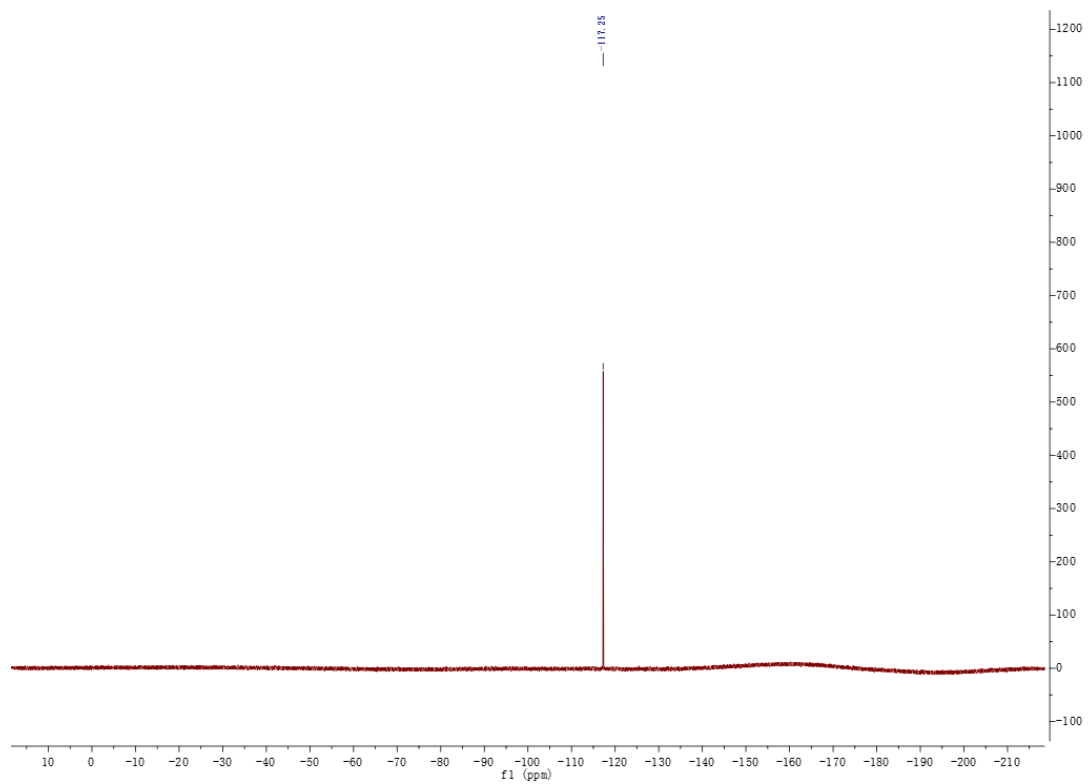

### <sup>13</sup>C NMR of 5r

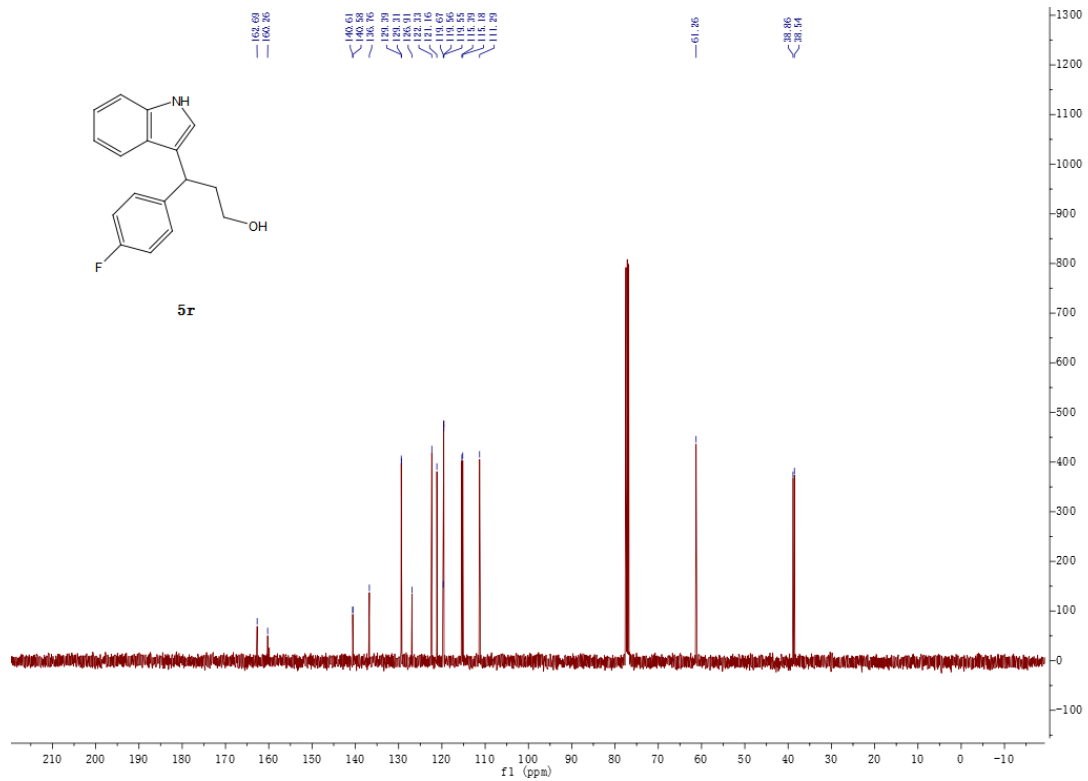

### <sup>1</sup>H NMR of 5s

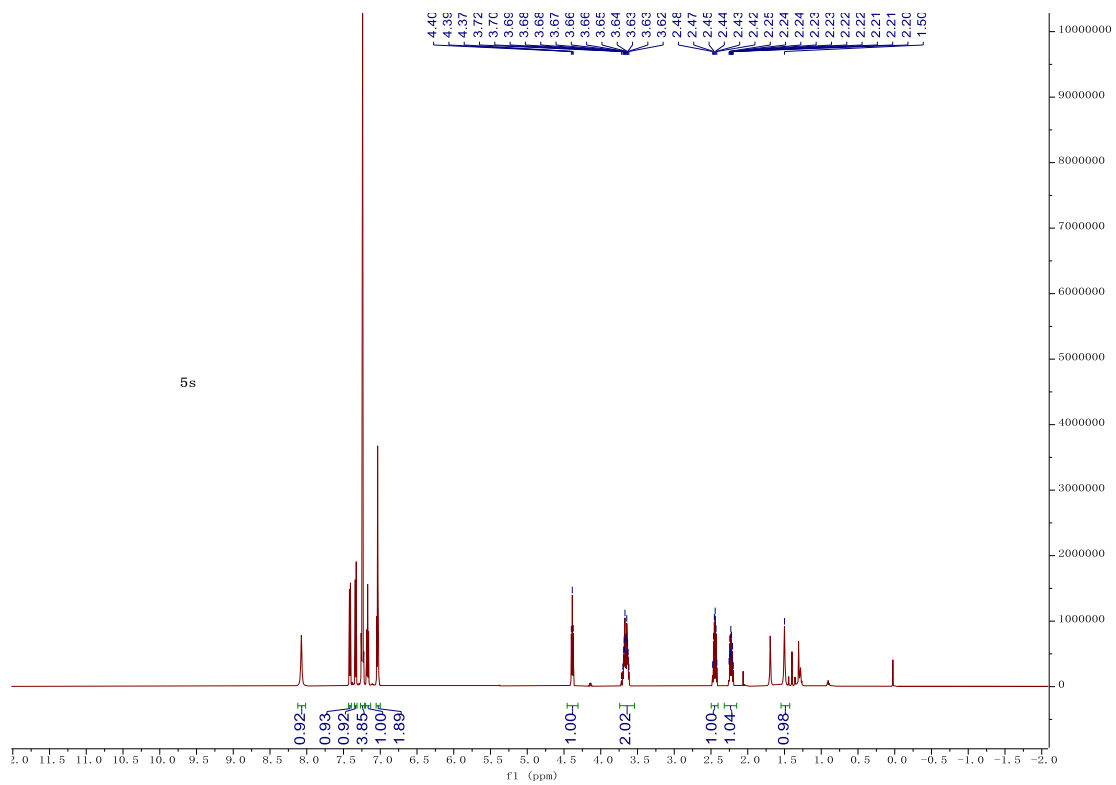



### $^{13}\text{C}$ NMR of **5s**

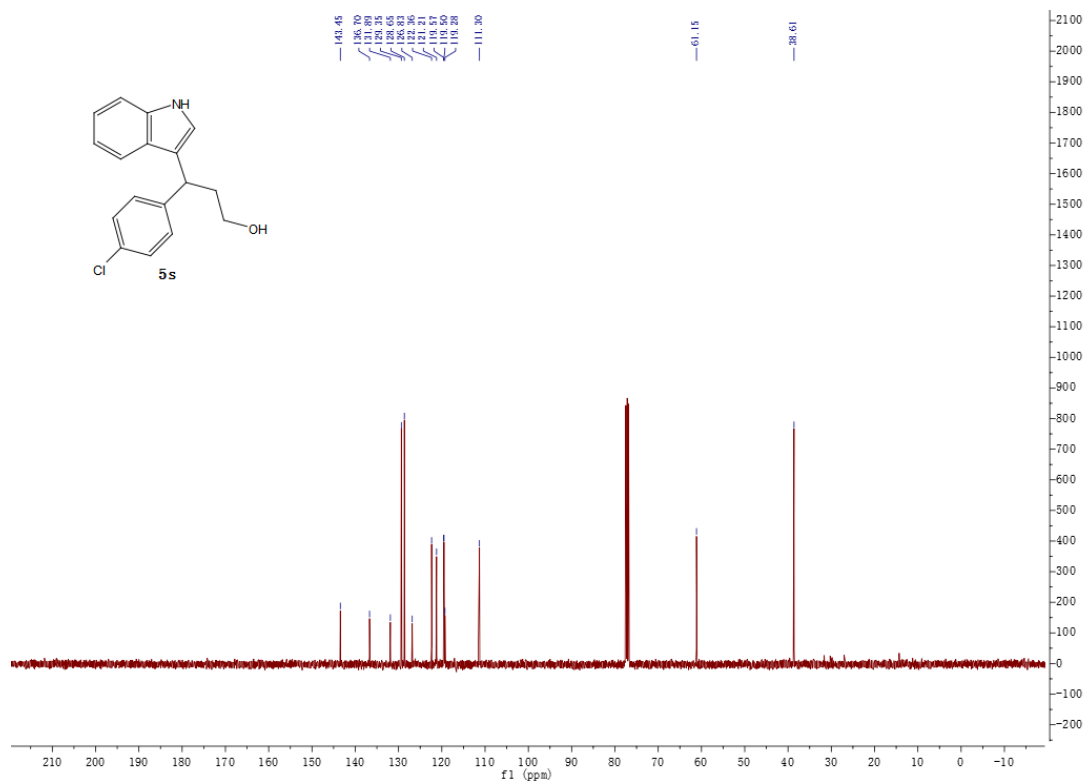

### $^1\text{H}$ NMR of **5t**

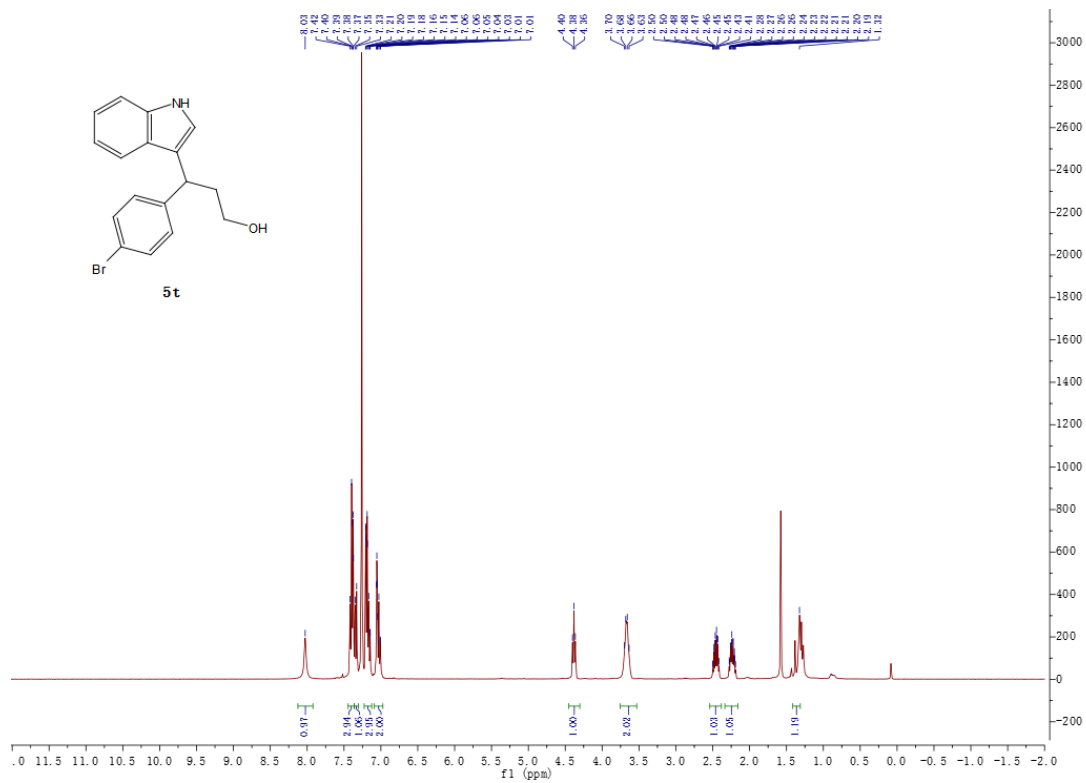

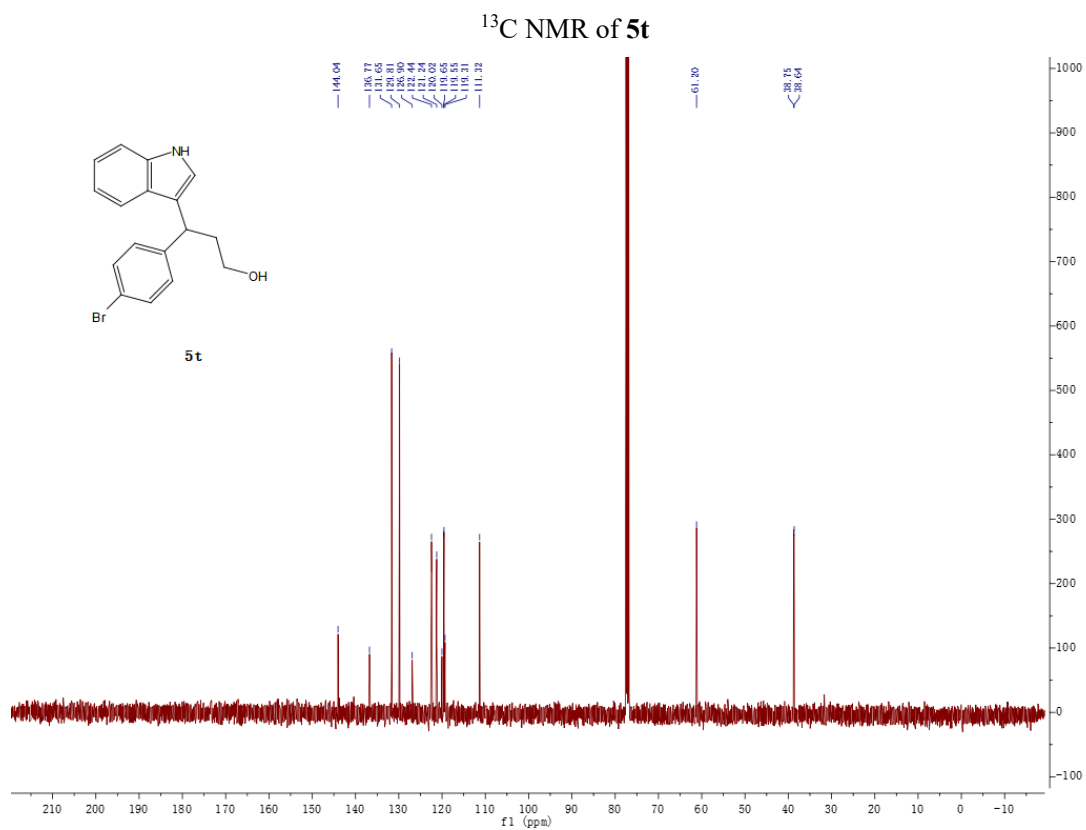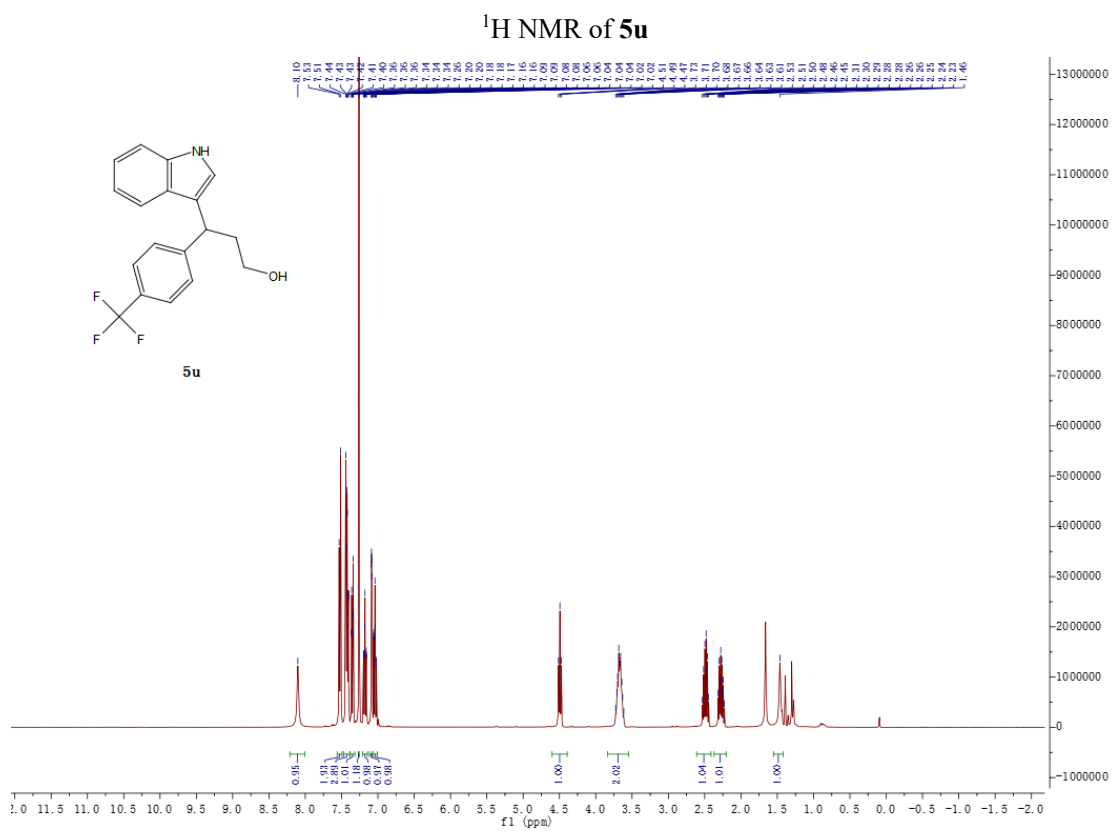

### <sup>19</sup>F NMR of **5u**

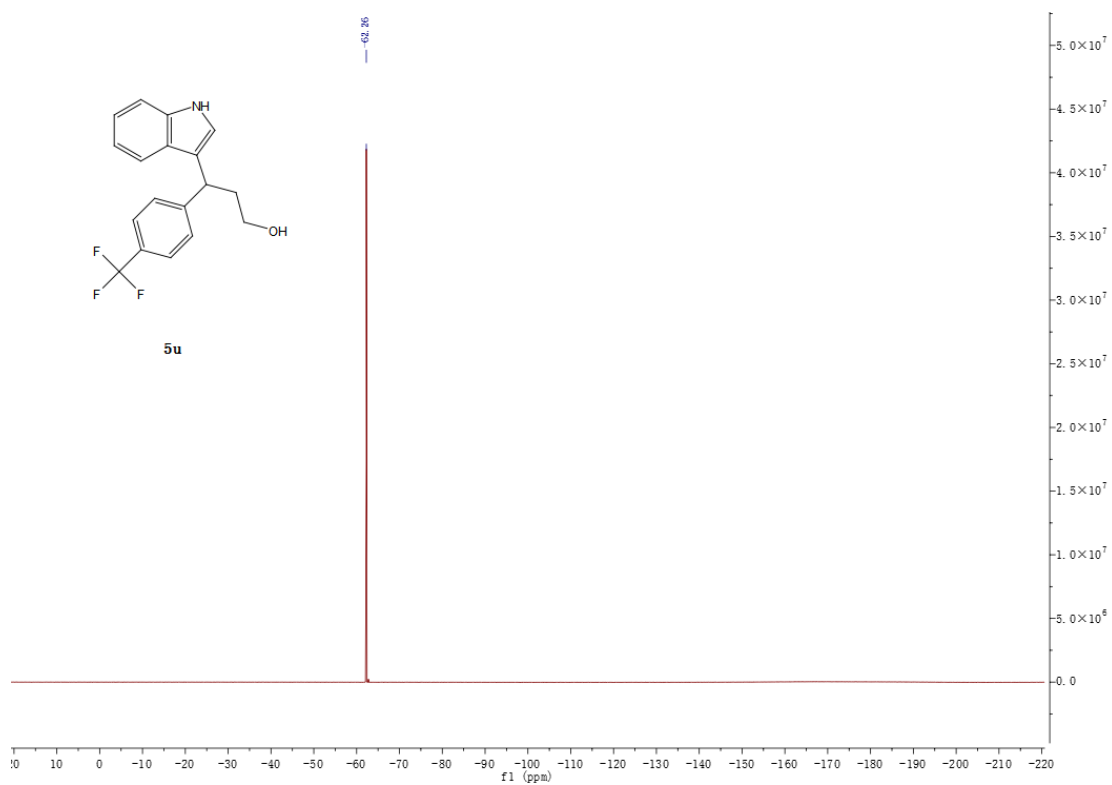

### <sup>13</sup>C NMR of **5u**

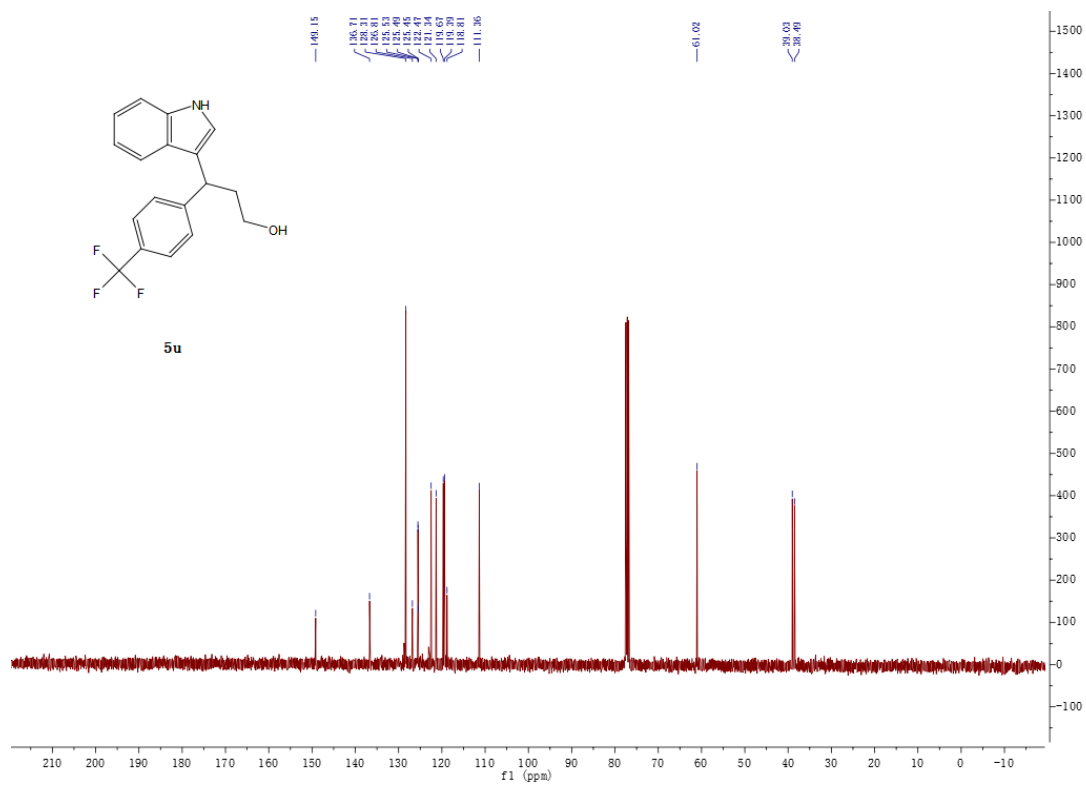

### <sup>1</sup>H NMR of 5v

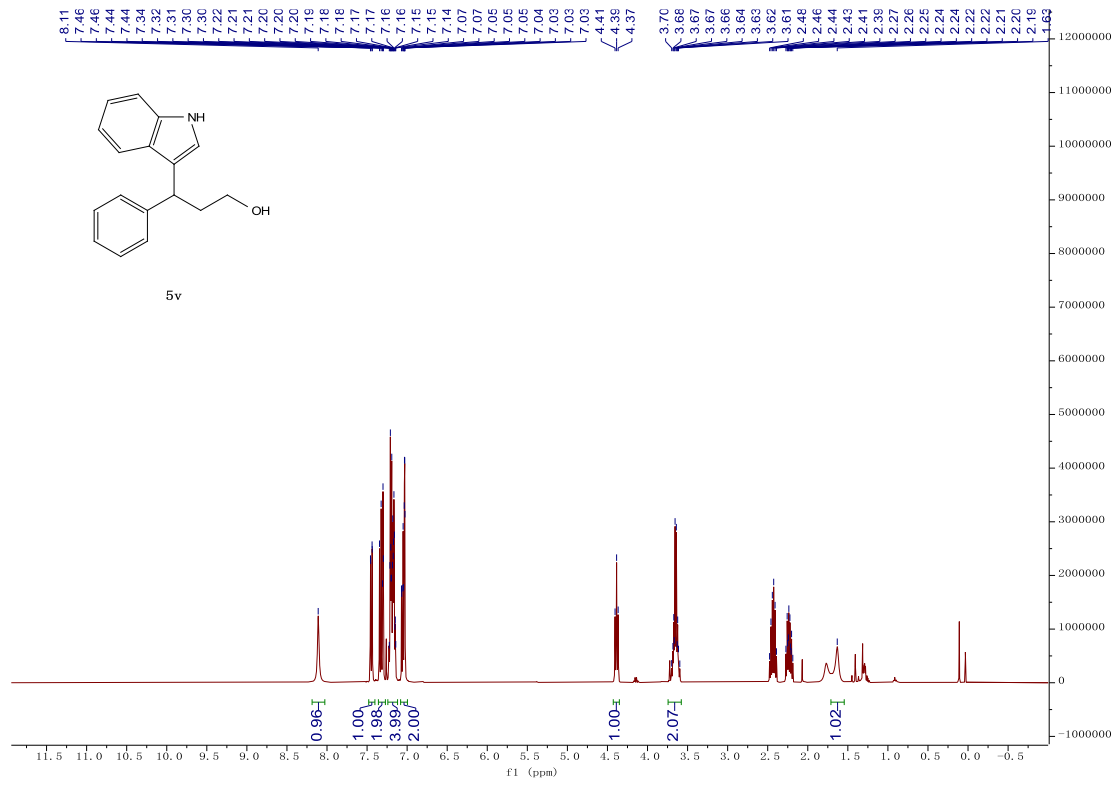

### <sup>13</sup>C NMR of 5v

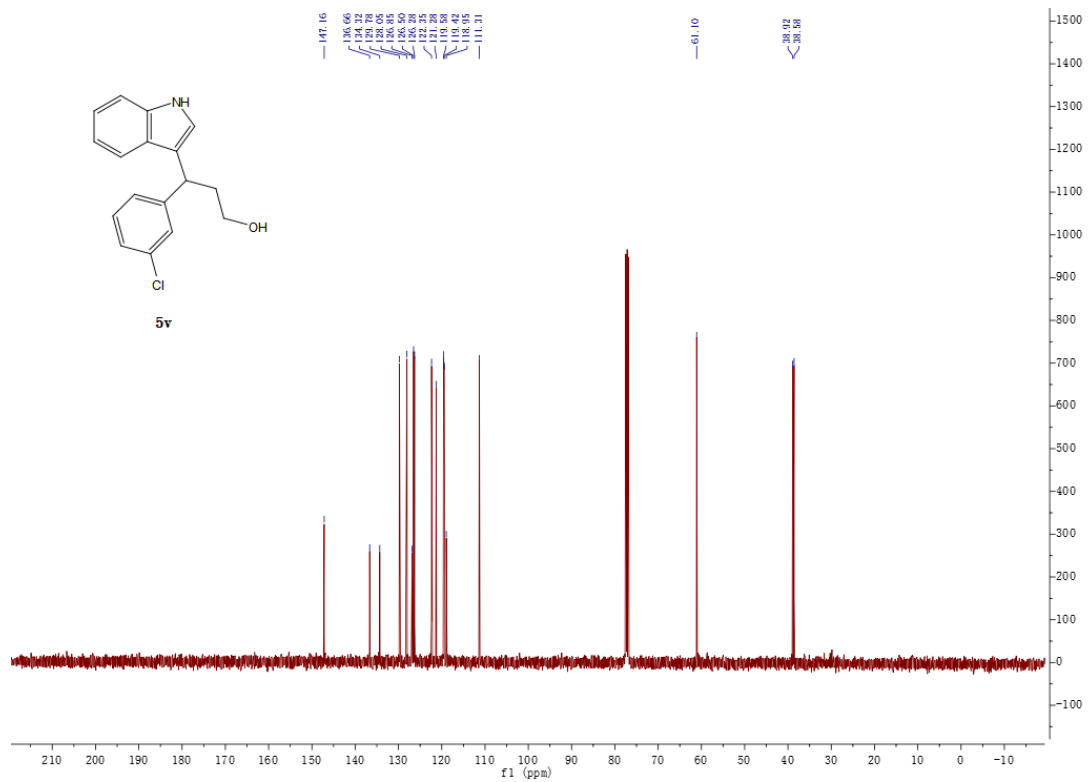

### <sup>1</sup>H NMR of 5w

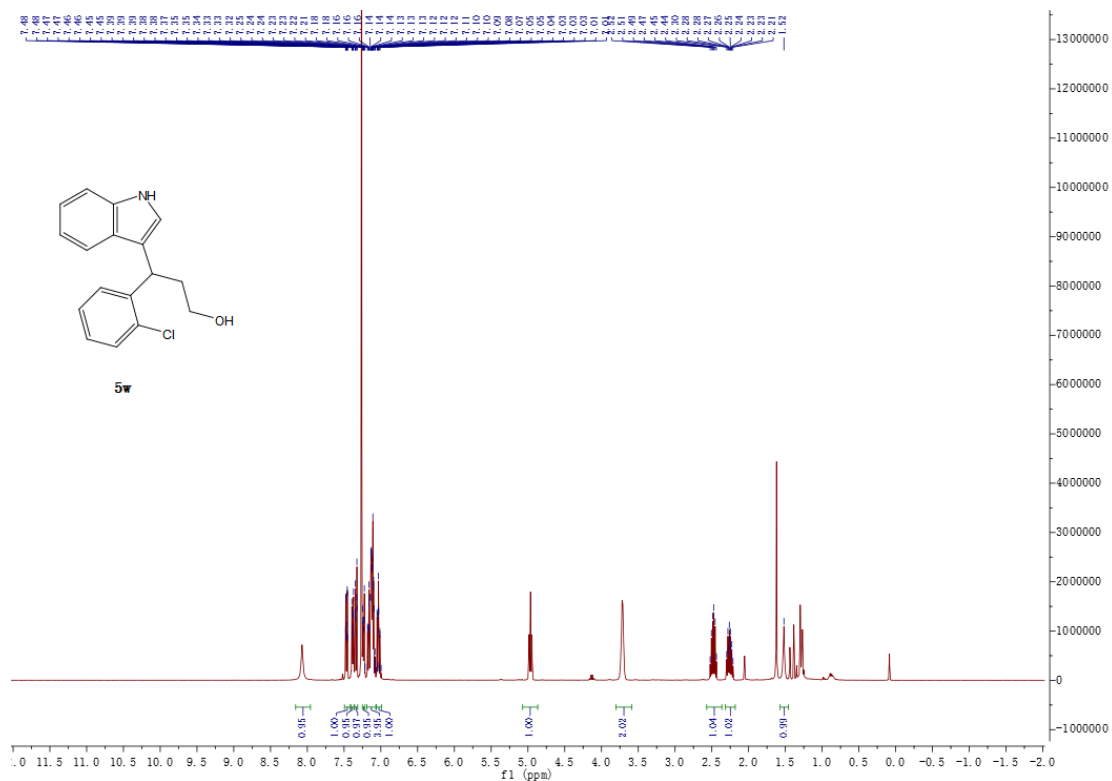

### <sup>13</sup>C NMR of 5w

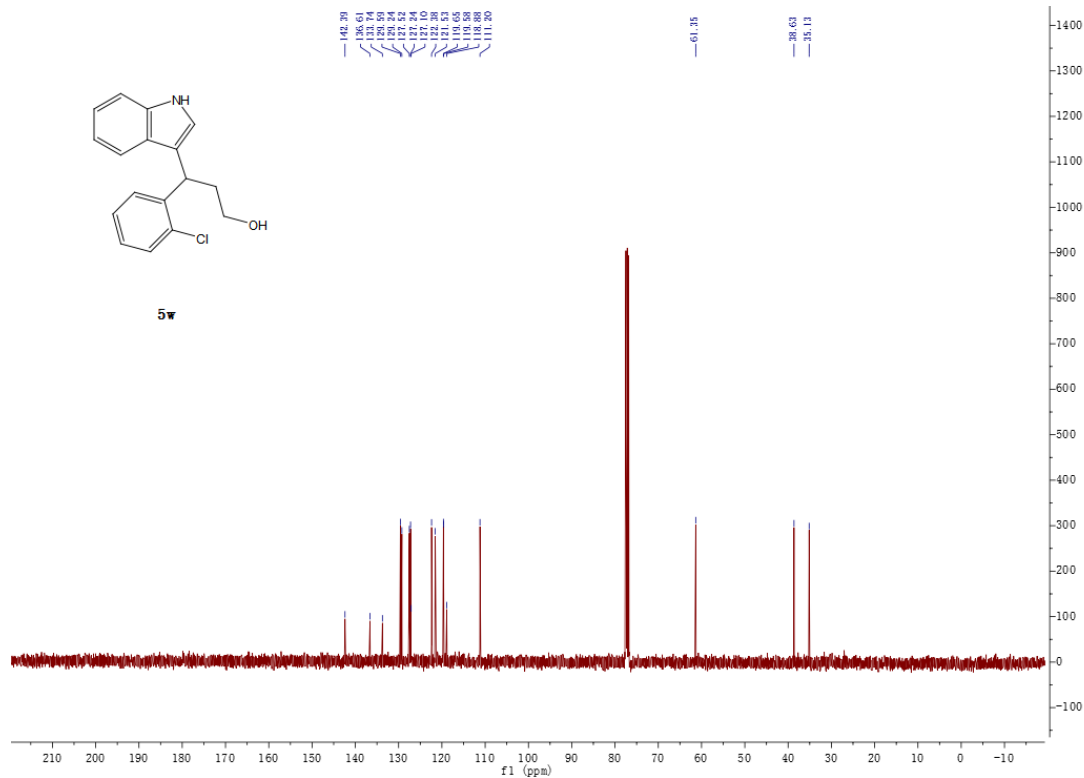



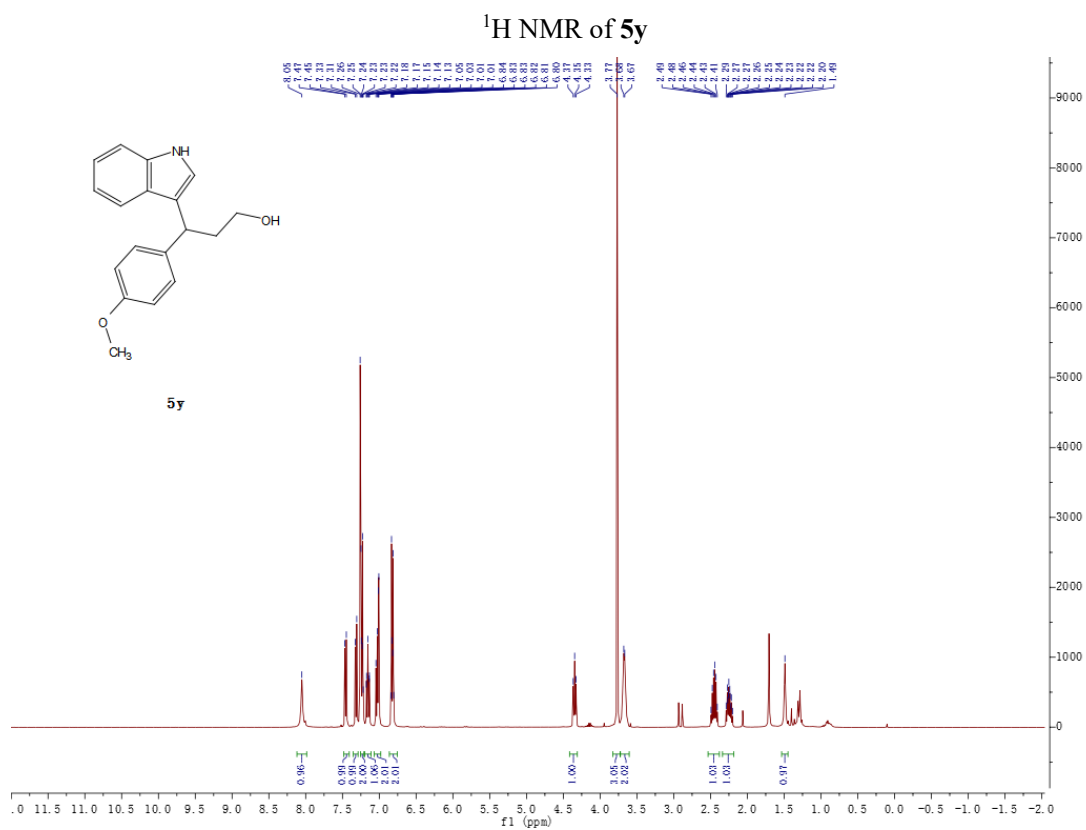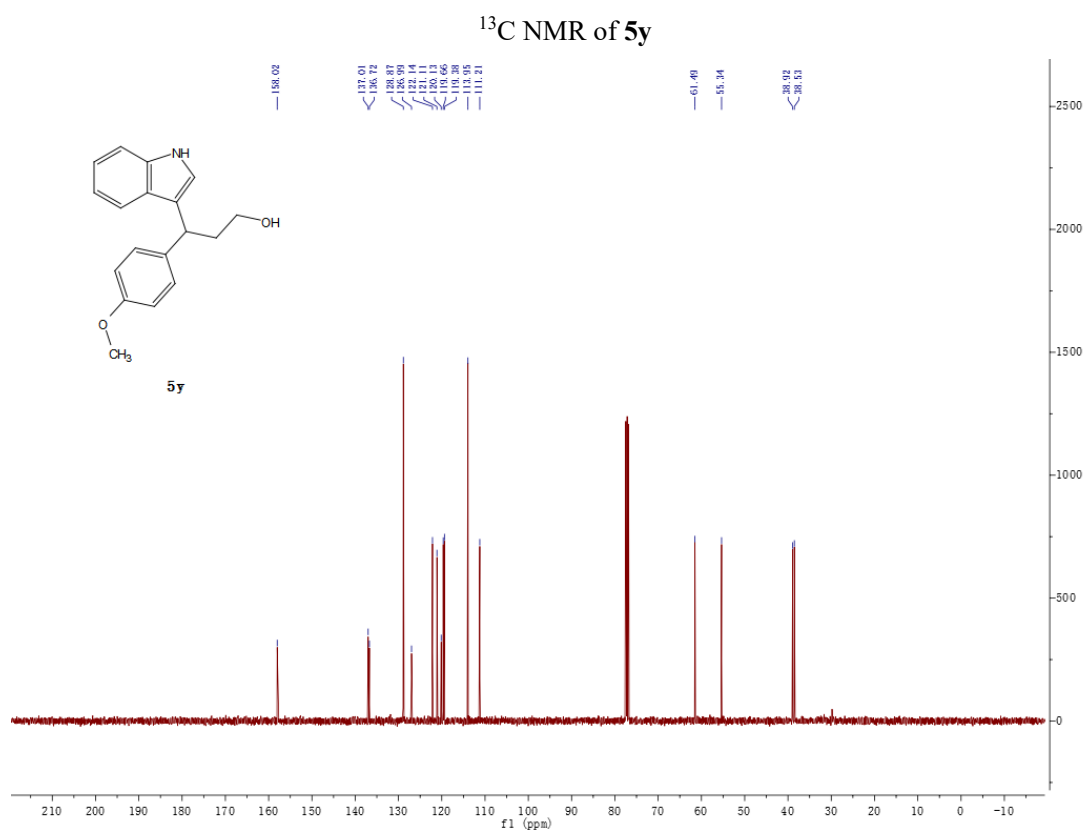





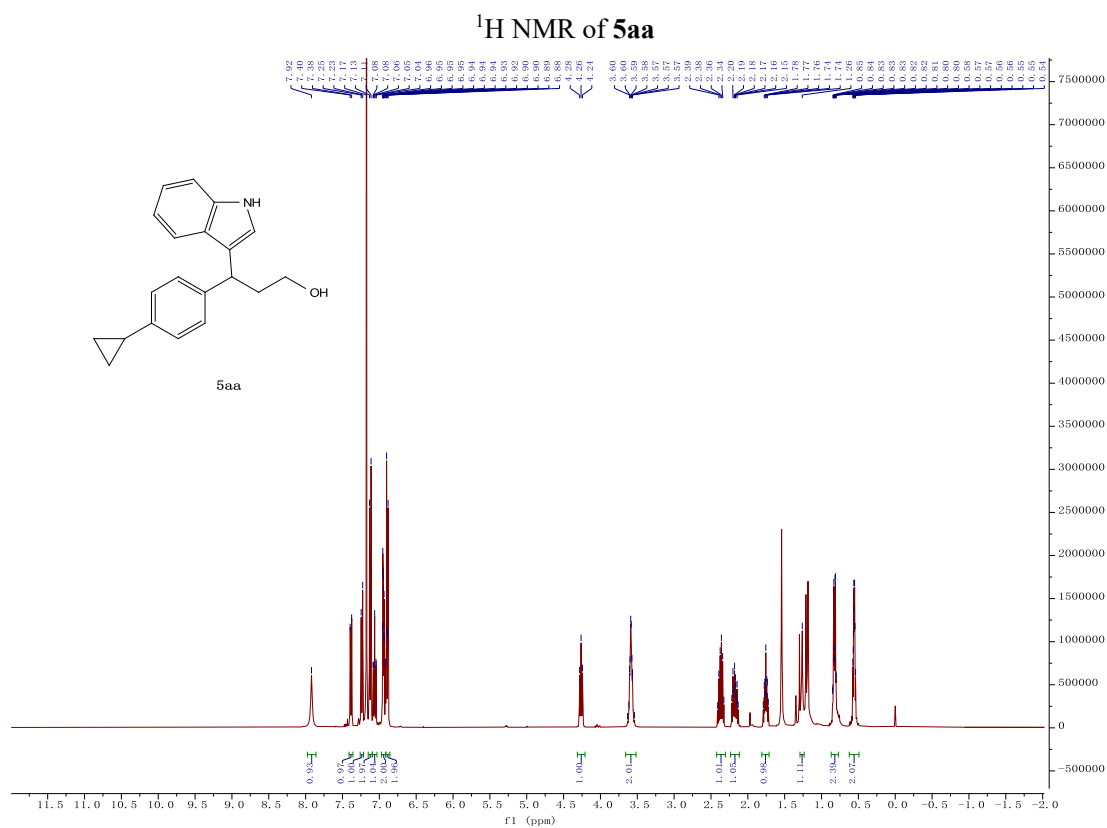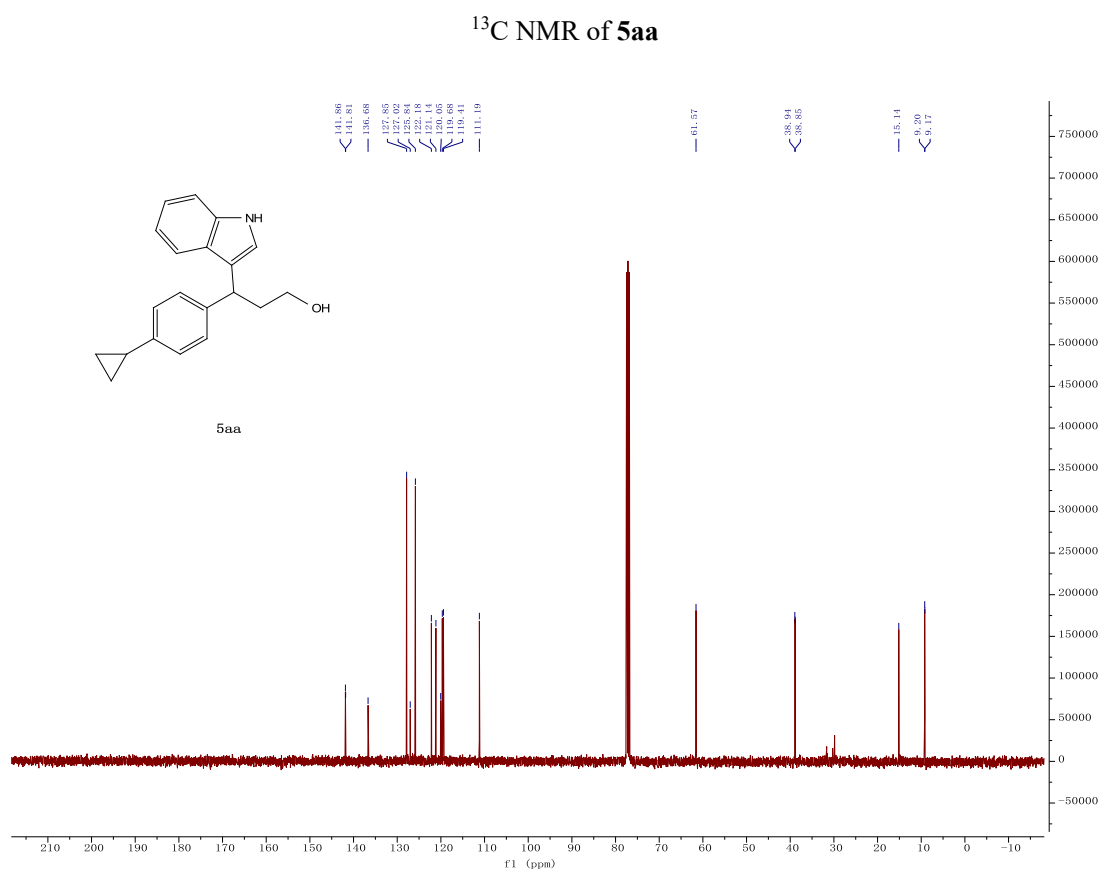

### <sup>1</sup>H NMR of 5ab

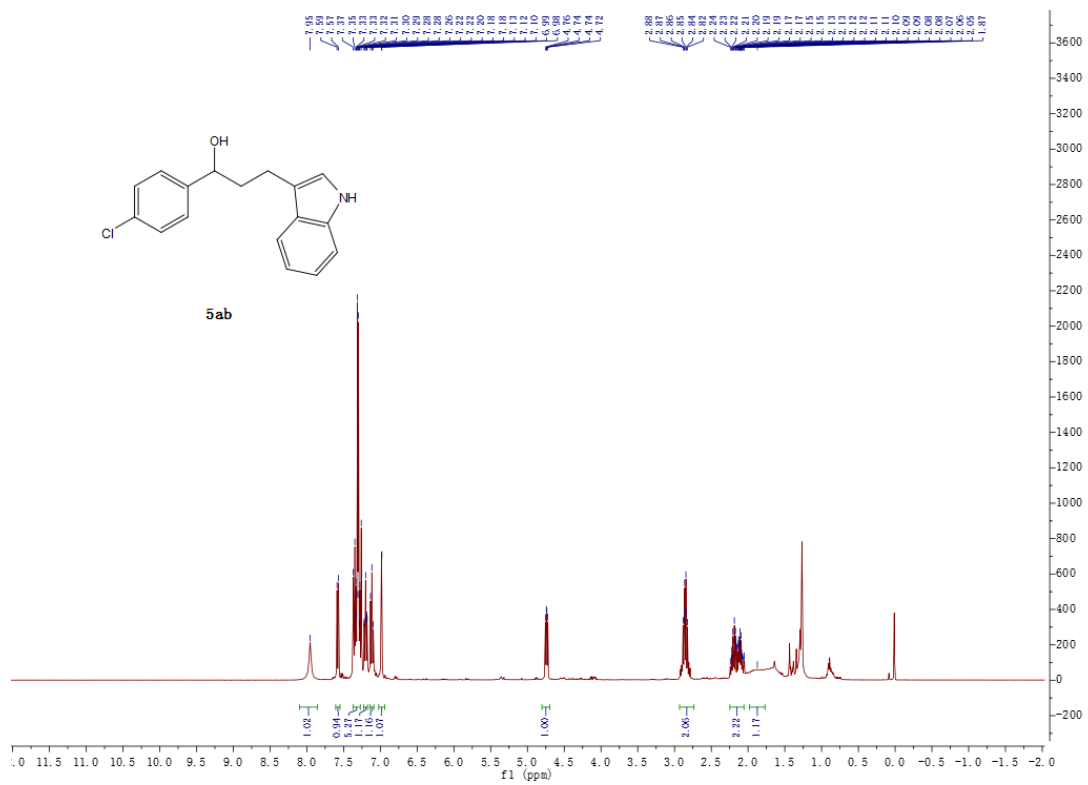

### <sup>13</sup>C NMR of 5ab

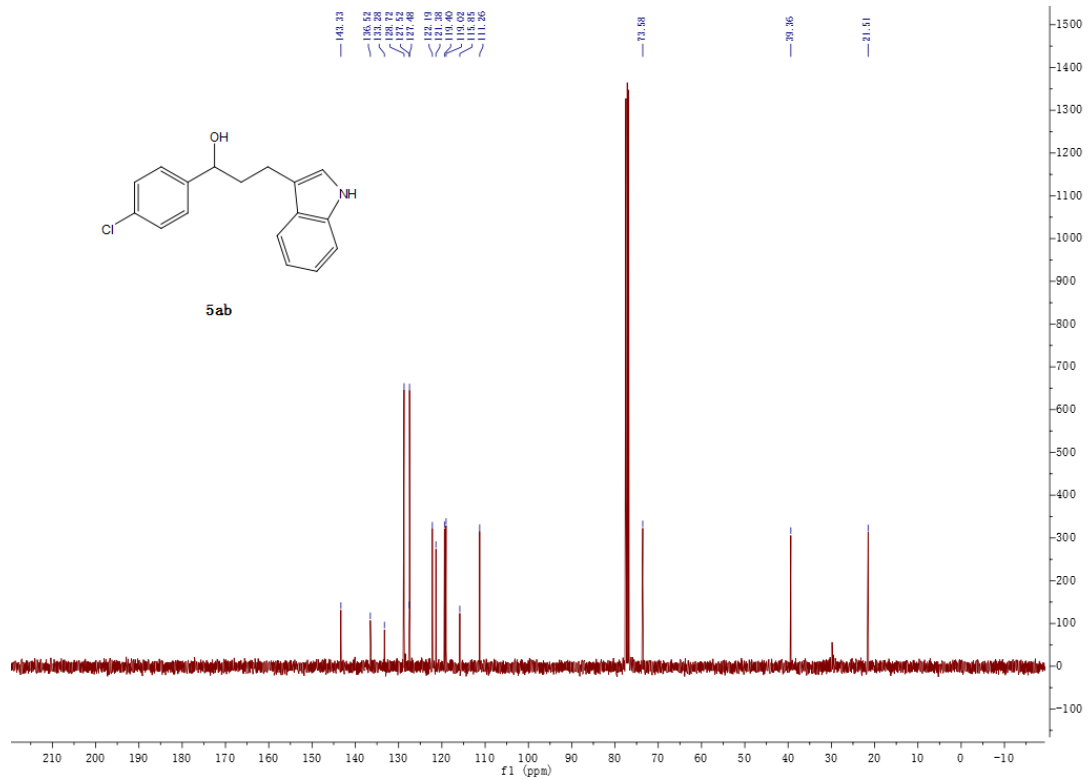

<sup>1</sup>H NMR of 5ac

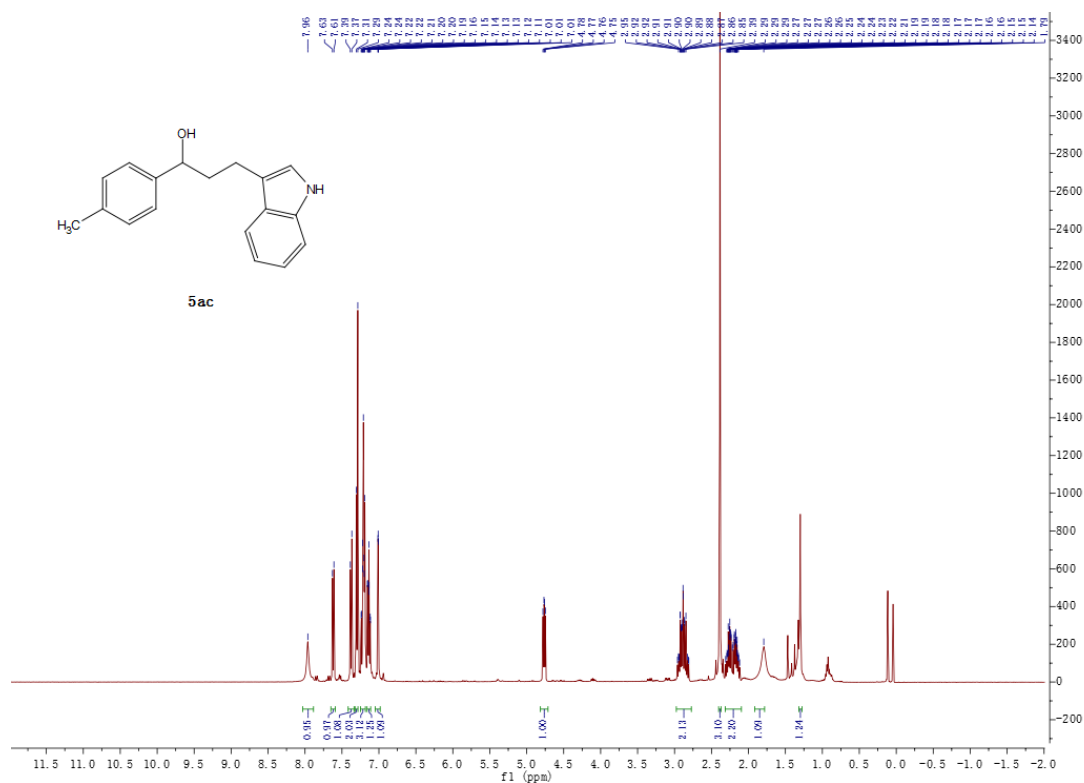

<sup>13</sup>C NMR of 5ac

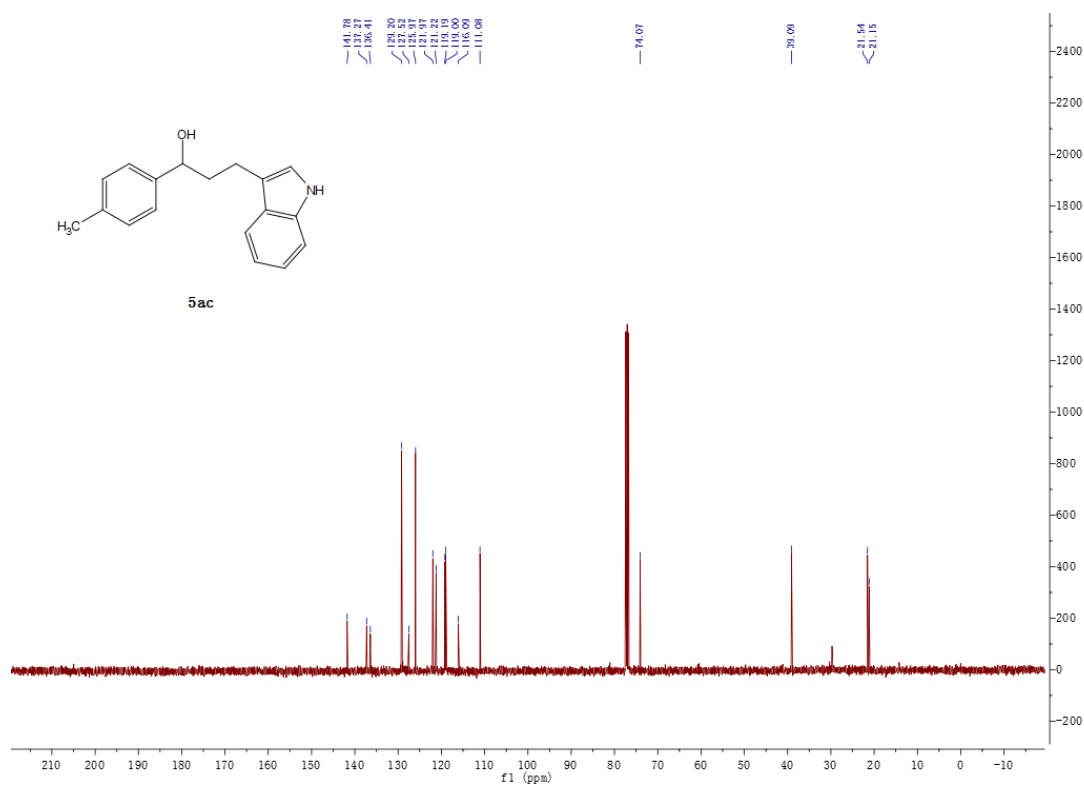



### <sup>1</sup>H NMR of 6

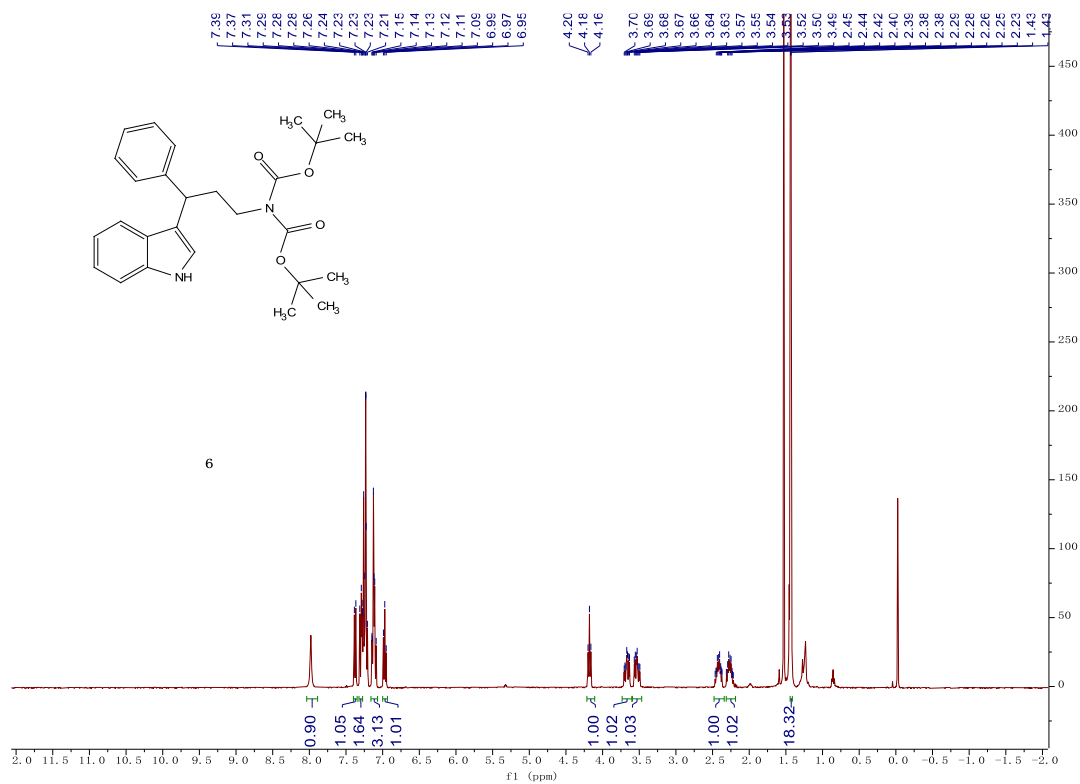

### <sup>13</sup>C NMR of 6

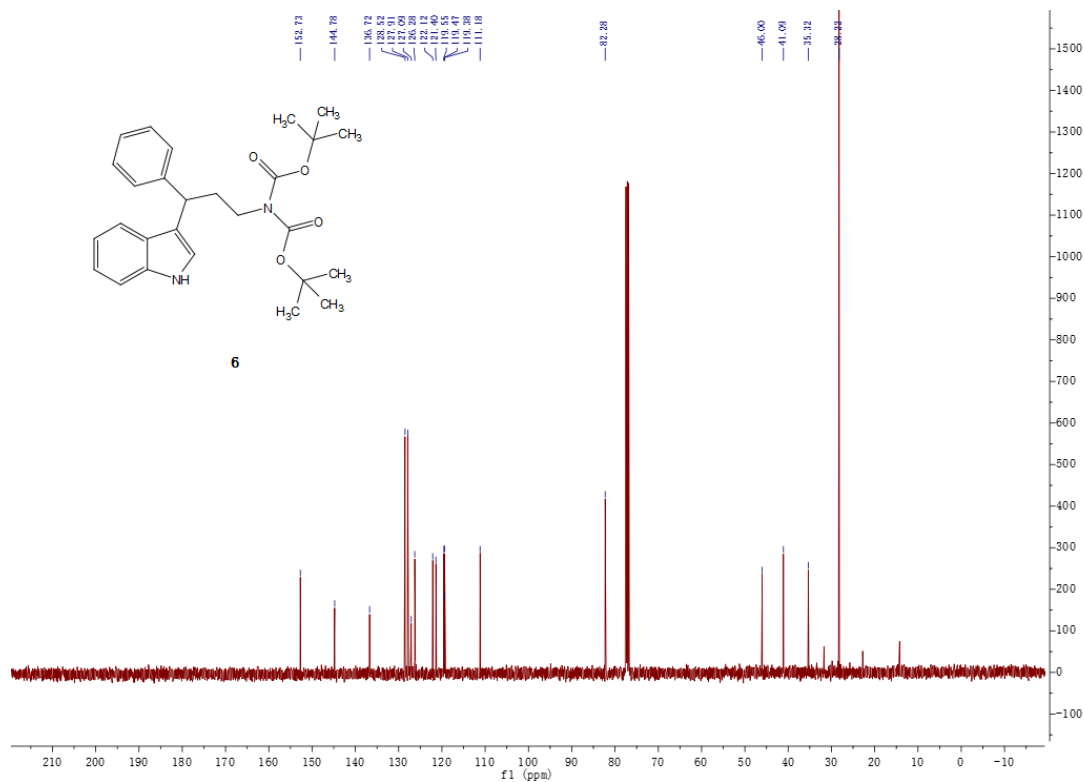

### <sup>1</sup>H NMR of 8

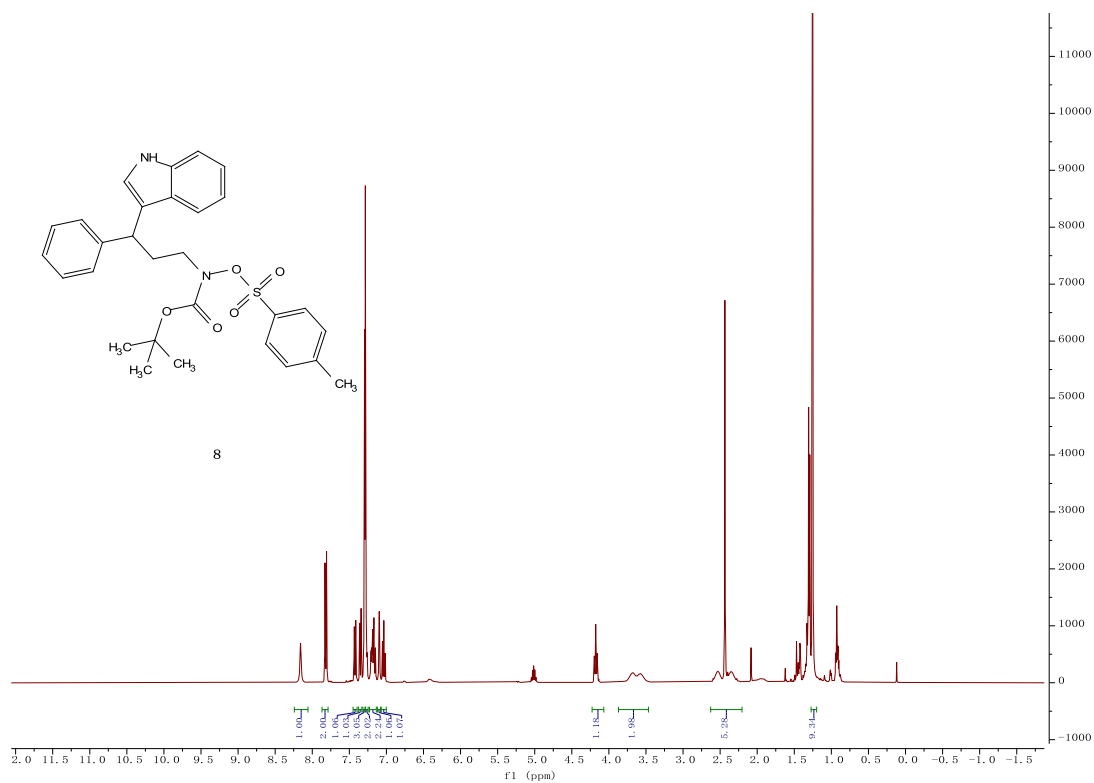

### <sup>1</sup>H NMR of 10

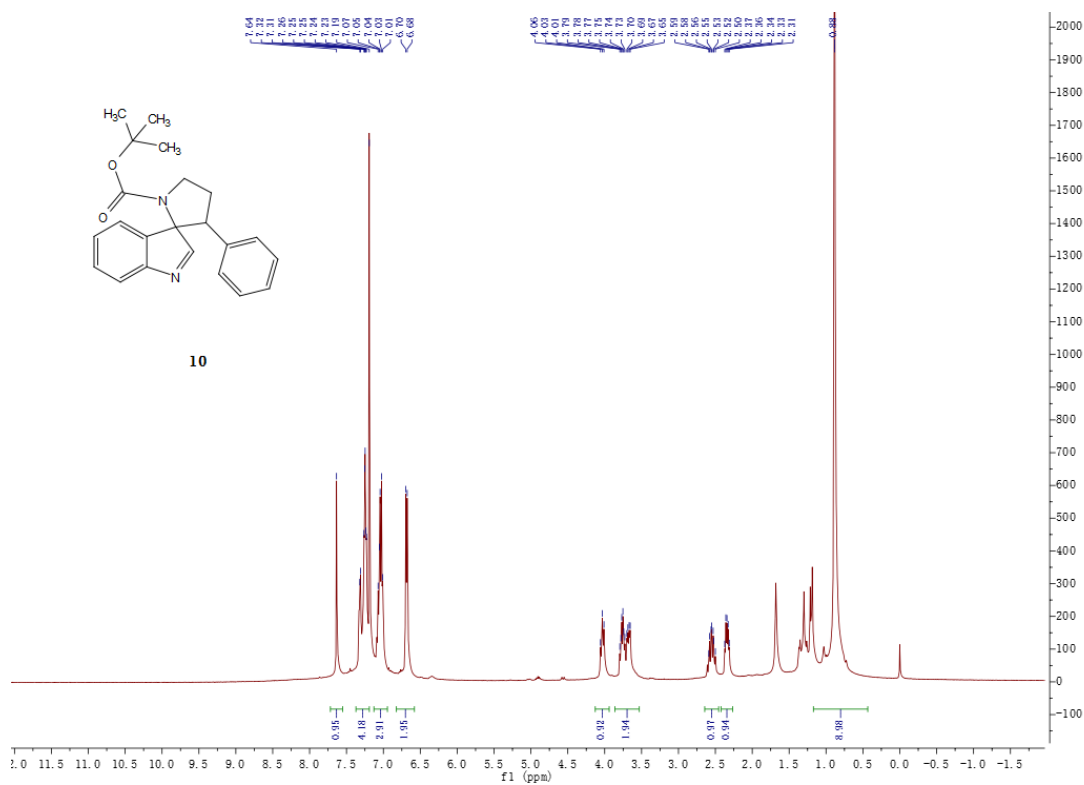

### $^{13}\text{C}$ NMR of 10

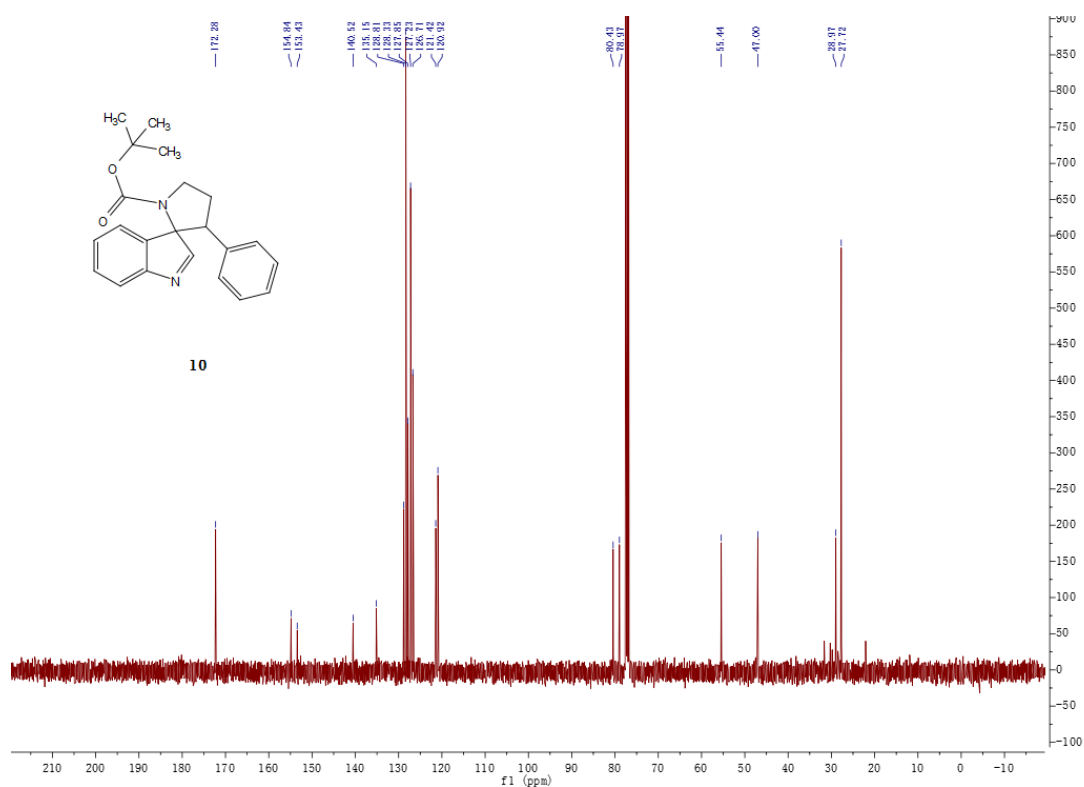

### $^1\text{H}$ NMR of 11

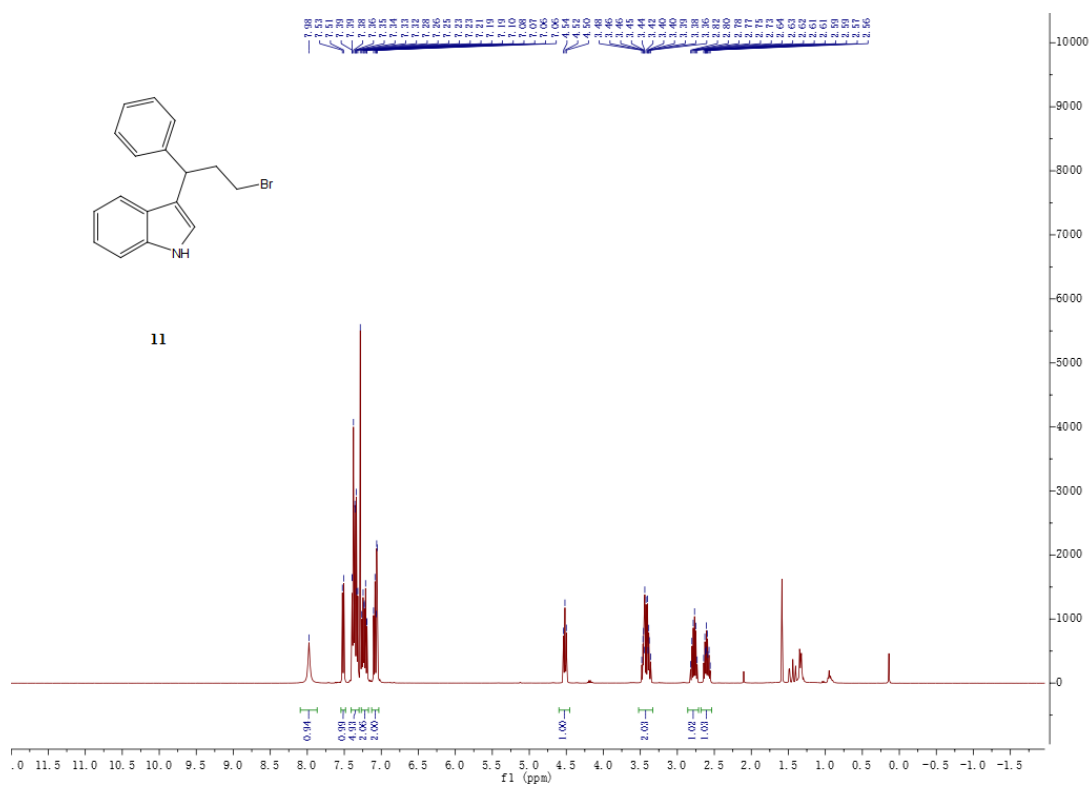

### <sup>13</sup>C NMR of 11

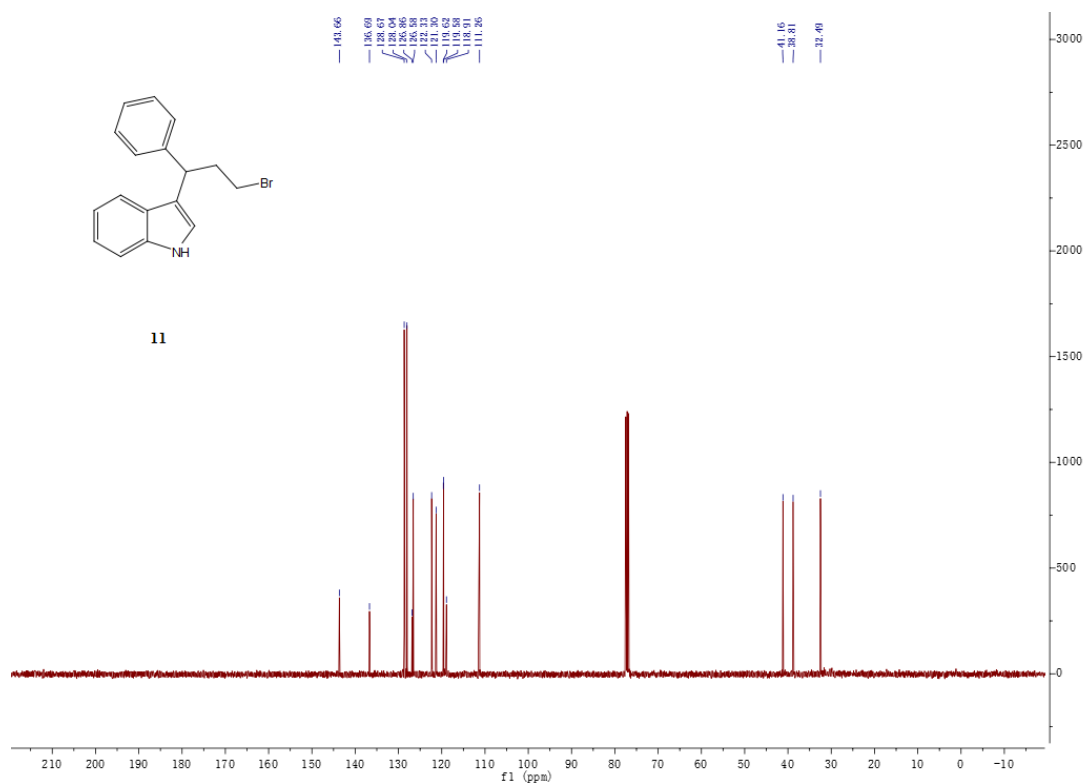

### <sup>1</sup>H NMR of N-N-D

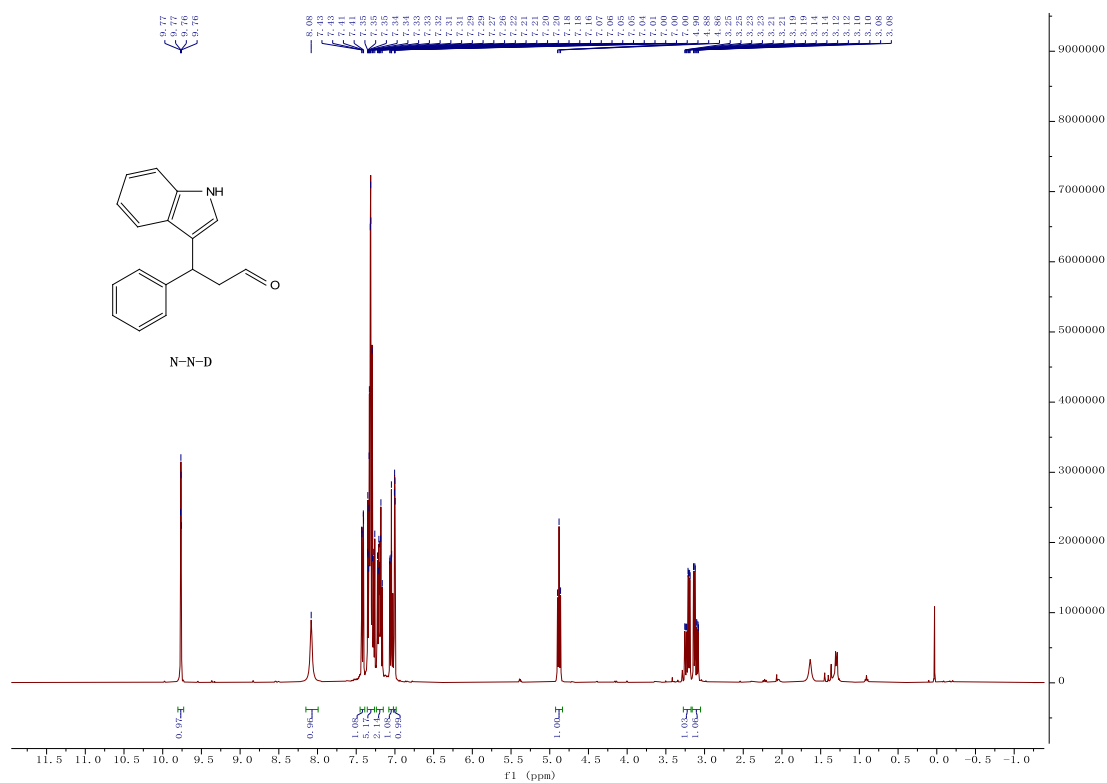



### <sup>13</sup>C NMR of N-N-D

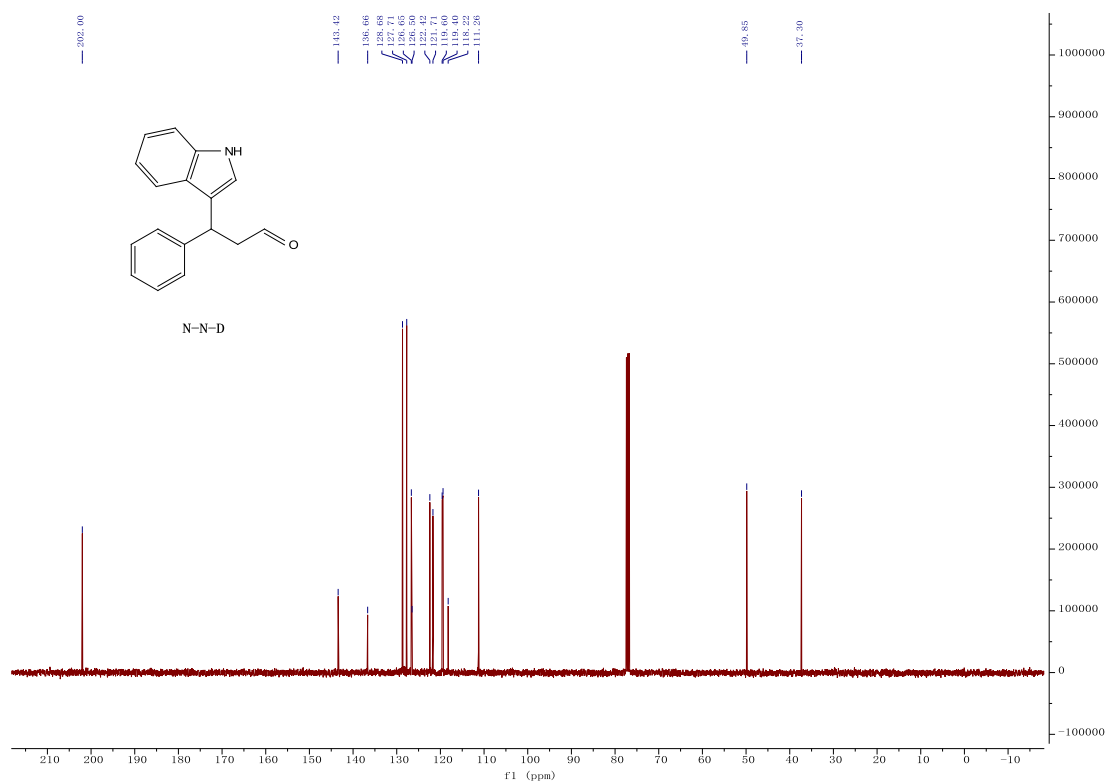

### <sup>1</sup>H NMR of 1b

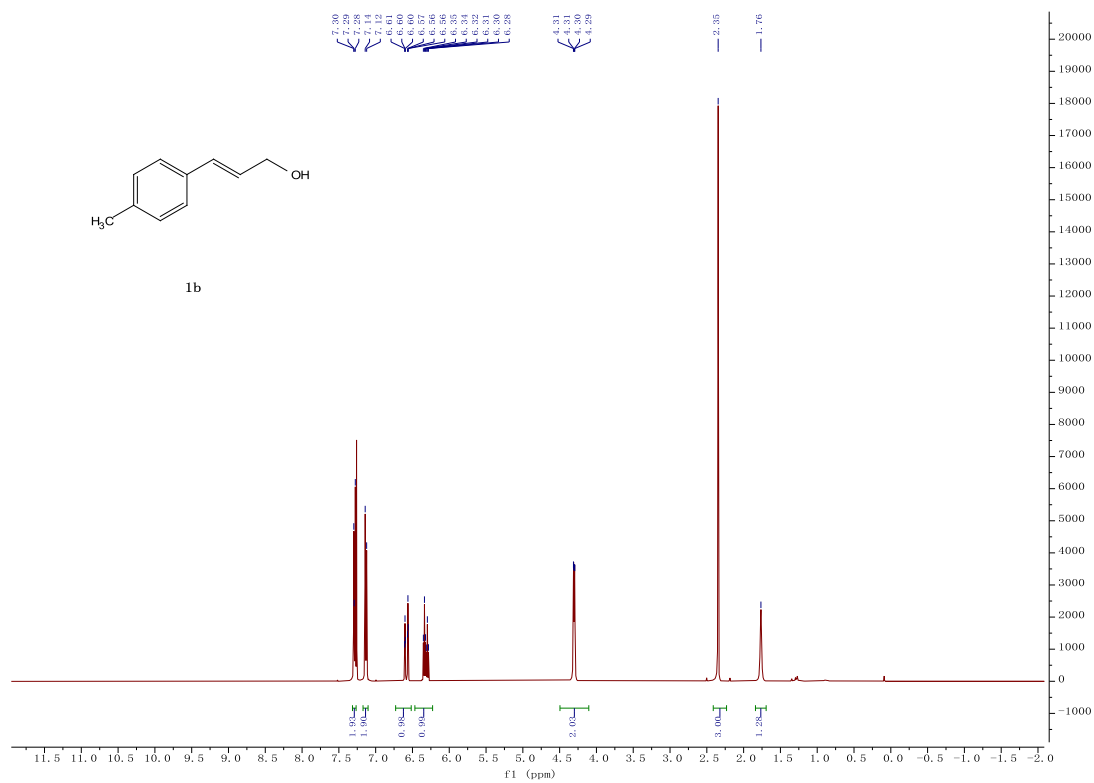

### <sup>13</sup>C NMR of 1b

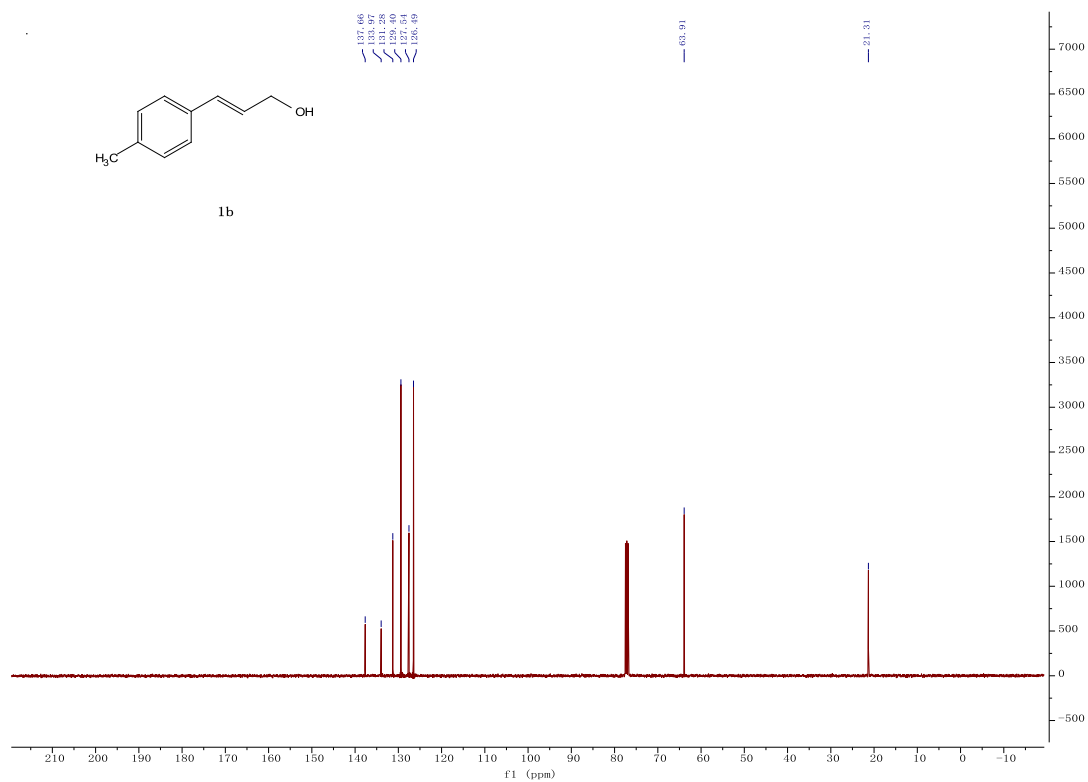

### <sup>1</sup>H NMR of 1c

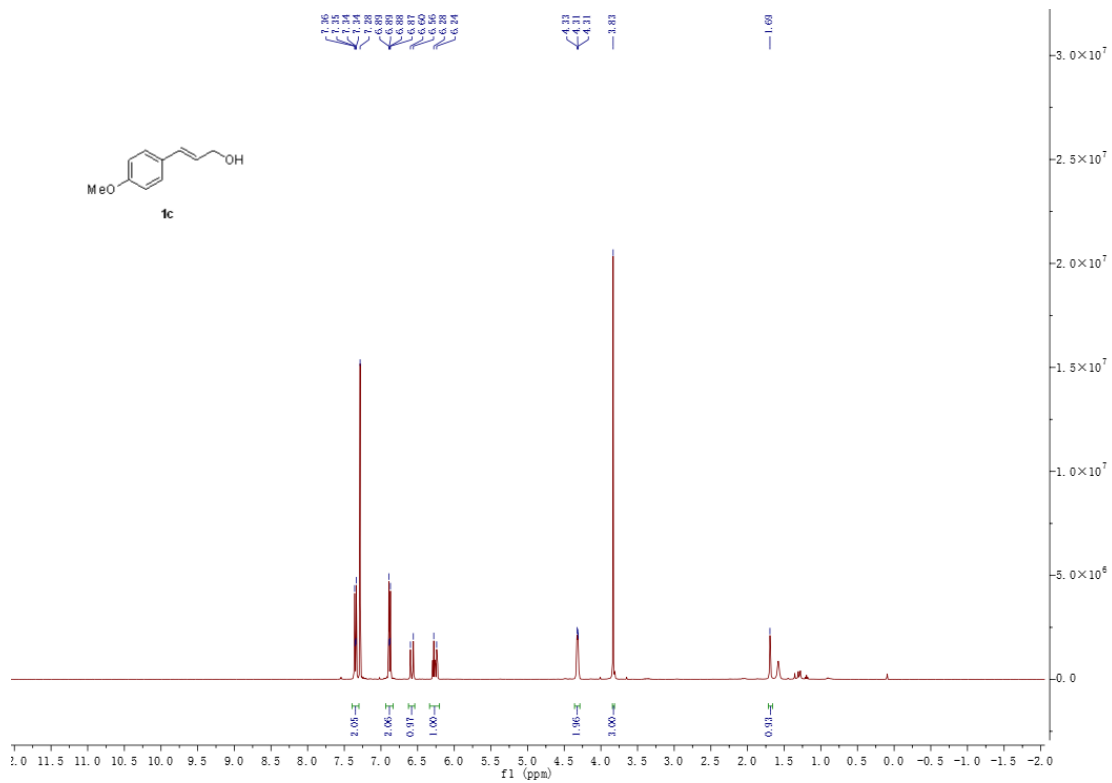

### <sup>1</sup>H NMR of **1d**

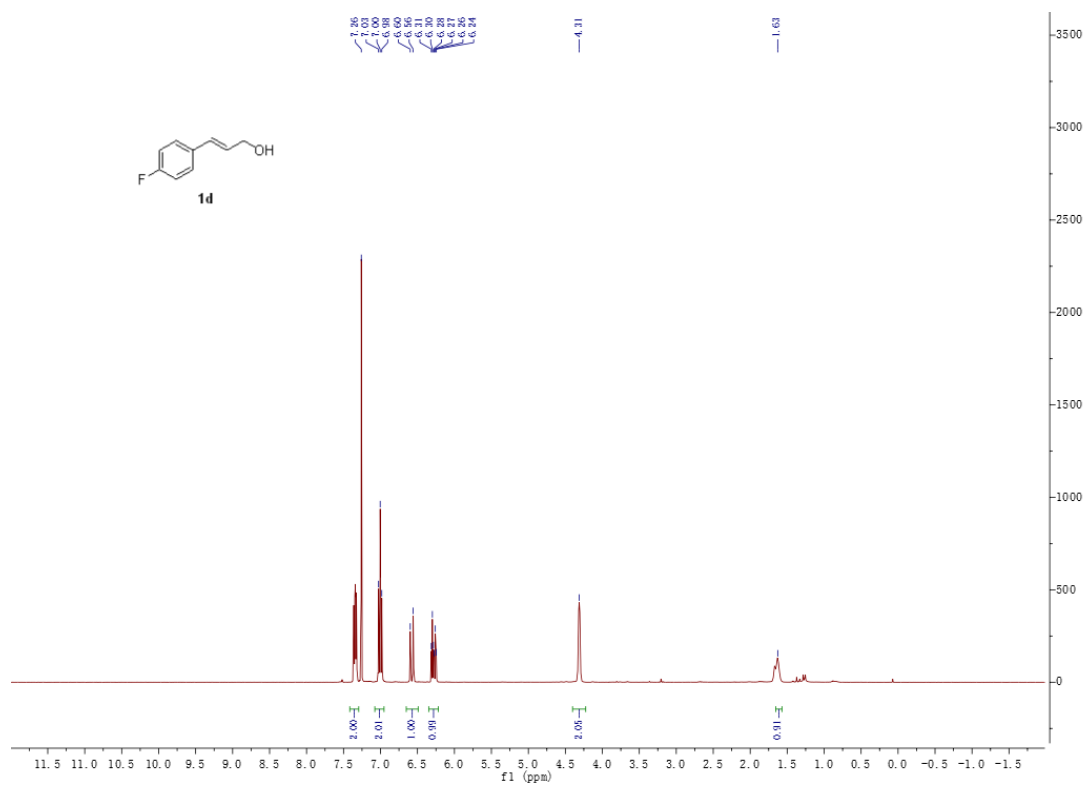

### <sup>19</sup>F NMR of **1d**

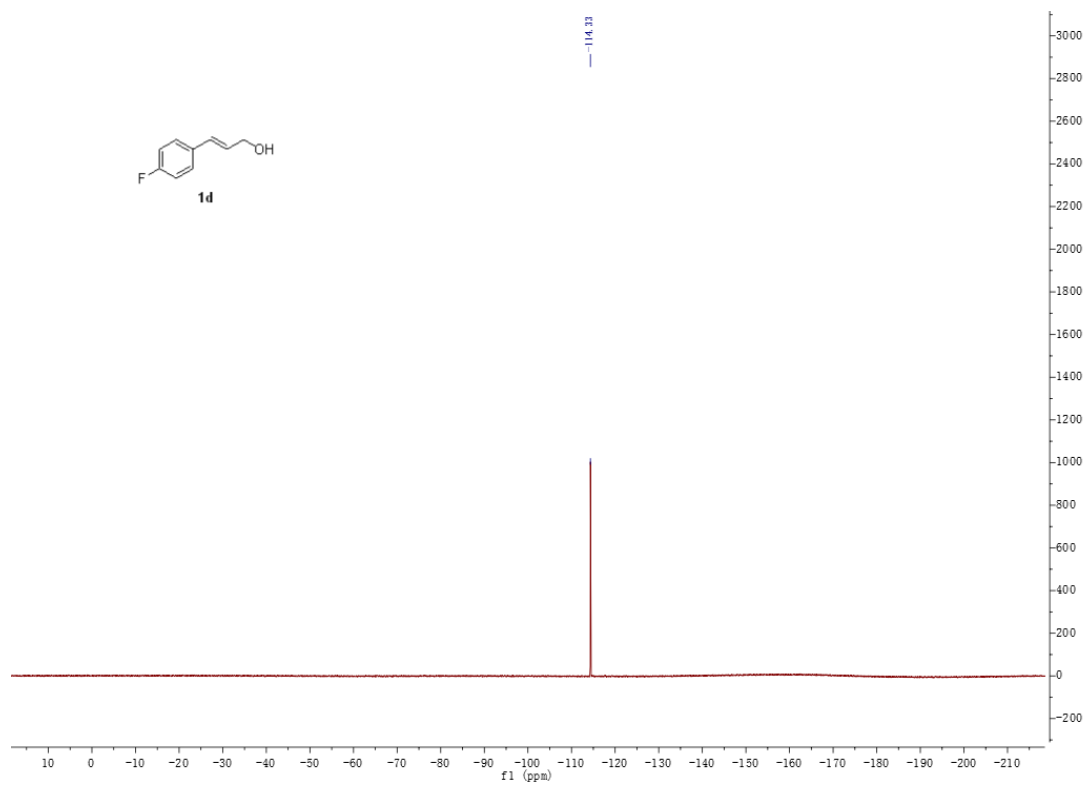

### $^{13}\text{C}$ NMR of **1d**

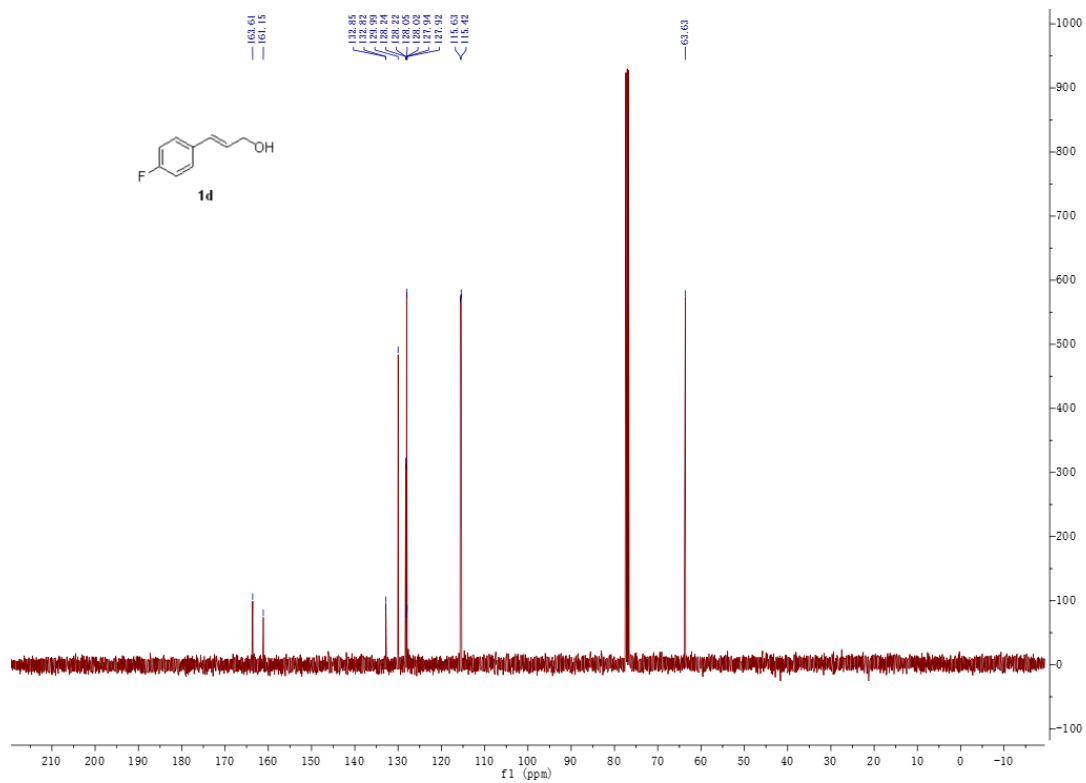

### $^1\text{H}$ NMR of **1e**

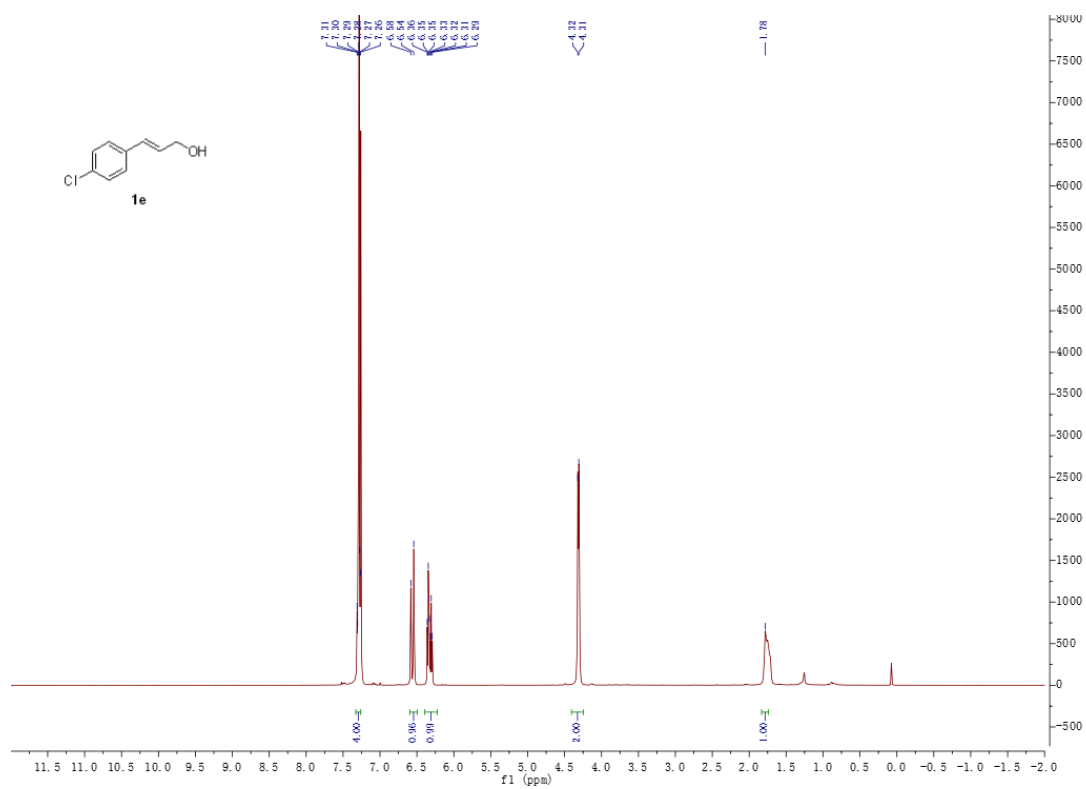

### <sup>13</sup>C NMR of 1e

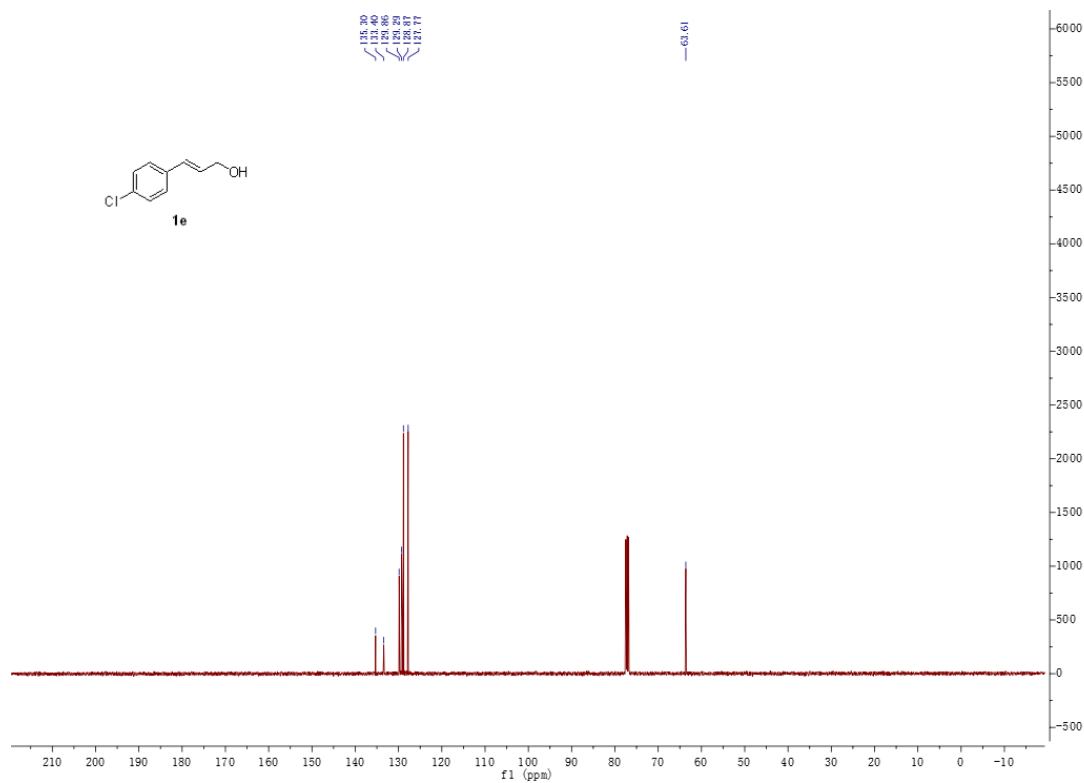

### <sup>1</sup>H NMR of 1f

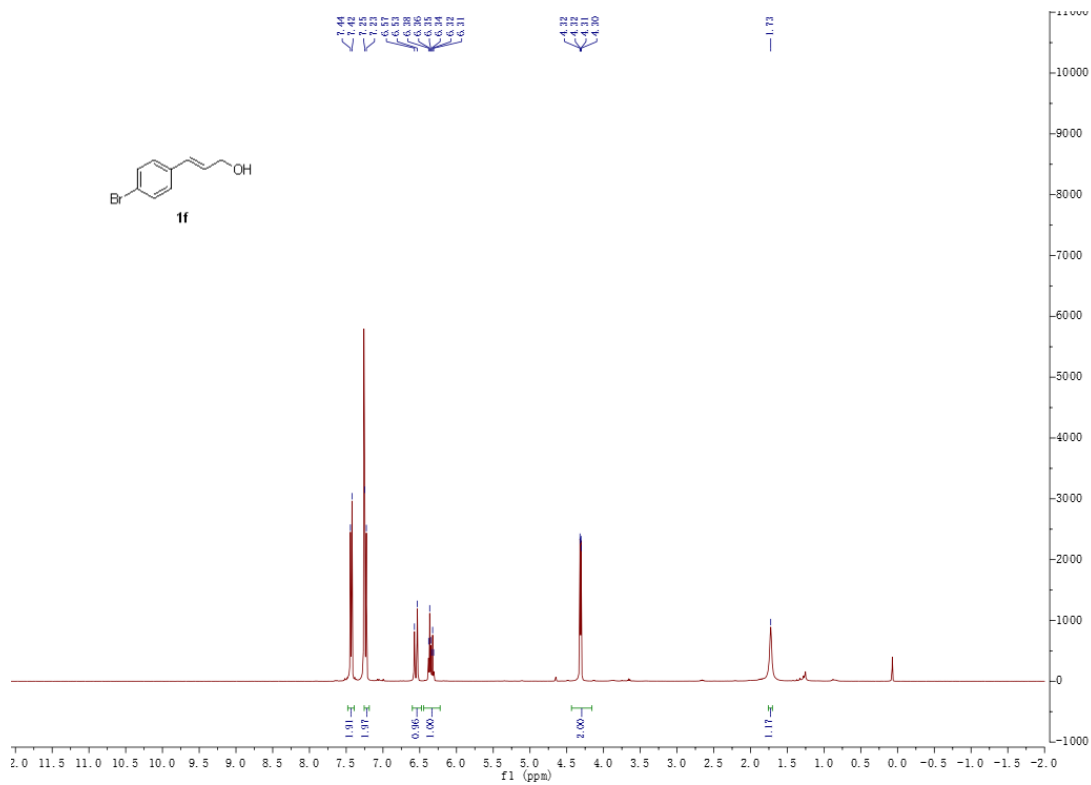

### $^{13}\text{C}$ NMR of **1f**

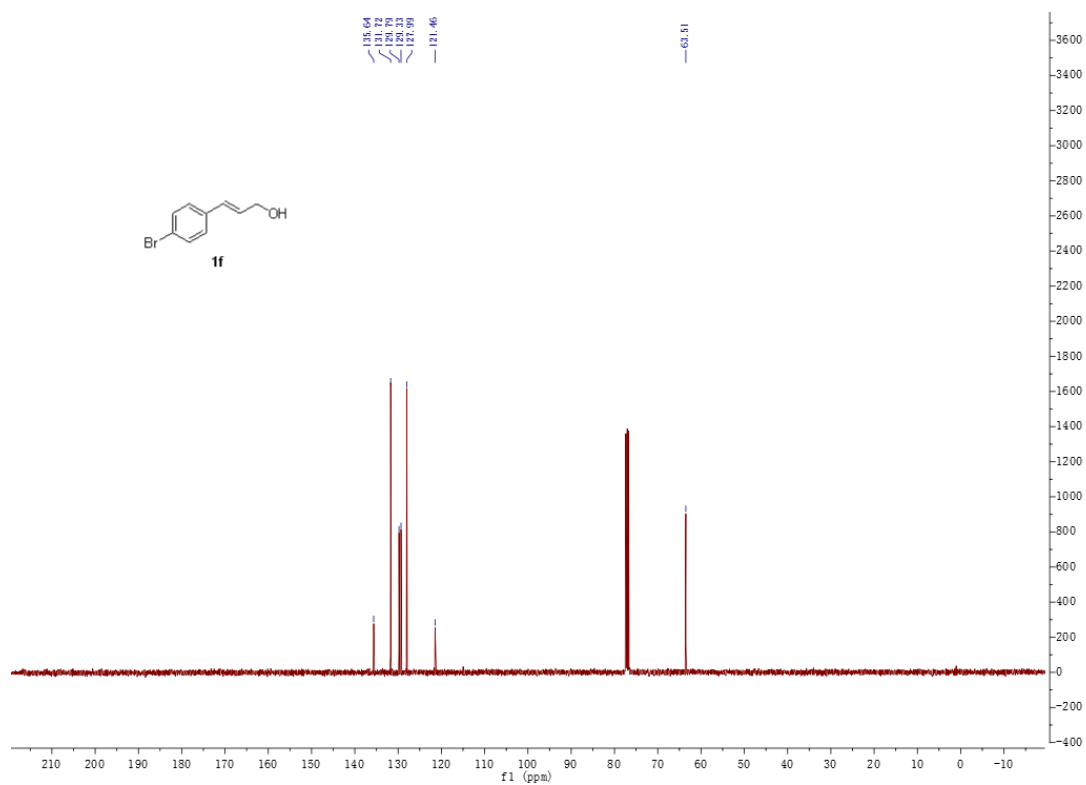

### $^1\text{H}$ NMR of **1g**

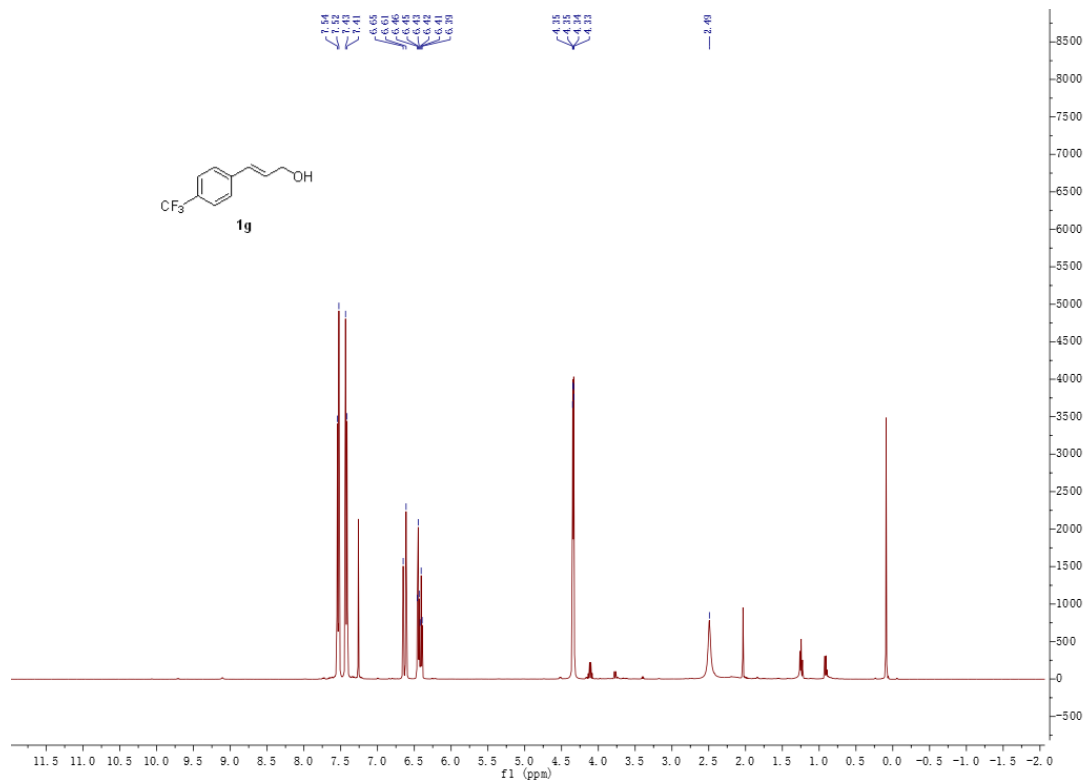

### <sup>19</sup>F NMR of **1g**

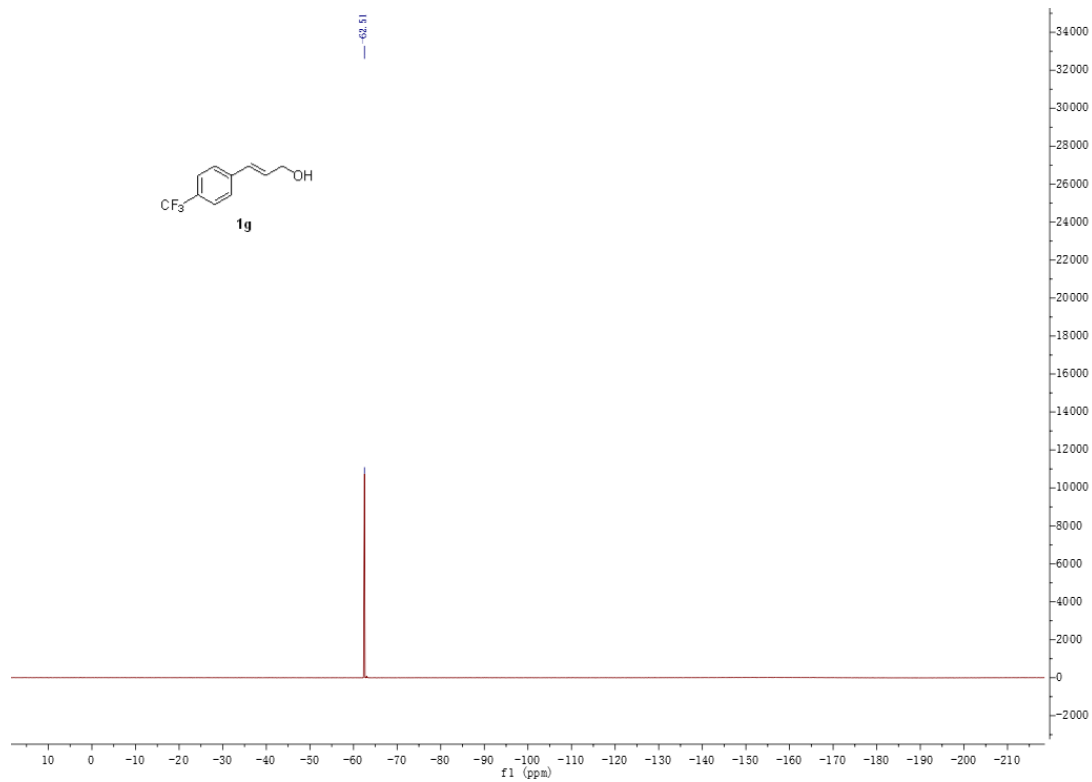

### <sup>13</sup>C NMR of **1g**

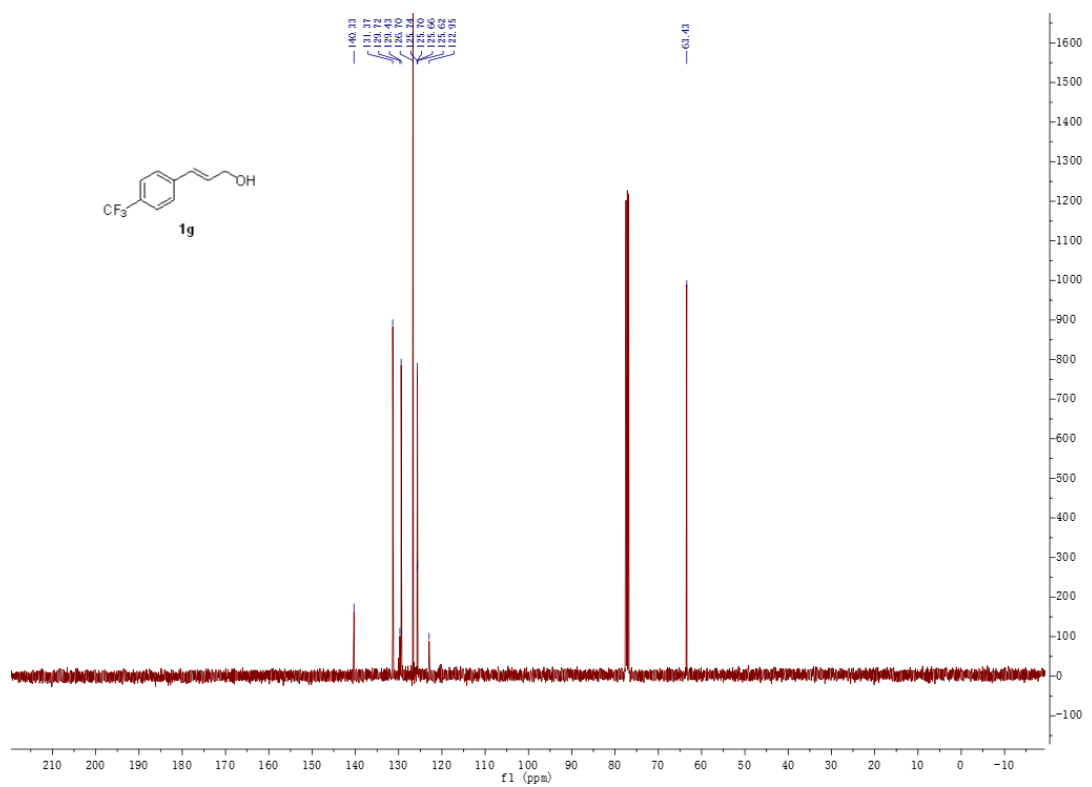

### <sup>1</sup>H NMR of **1h**

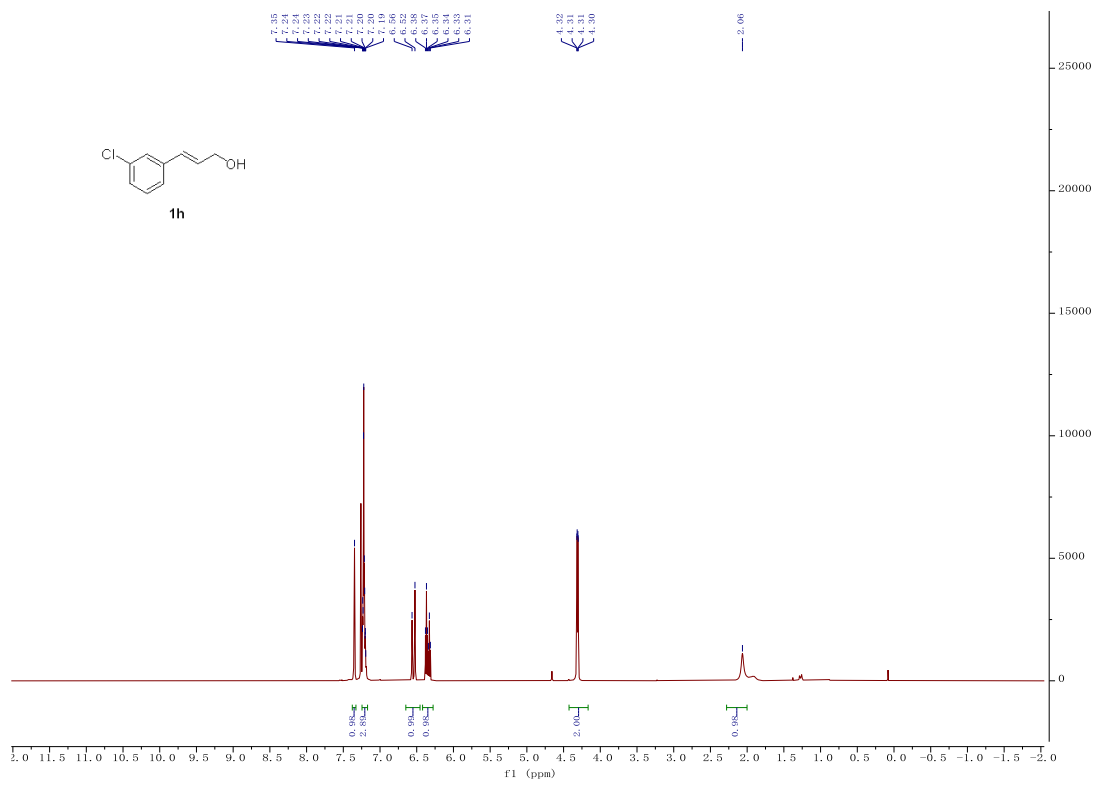

### <sup>13</sup>C NMR of **1h**

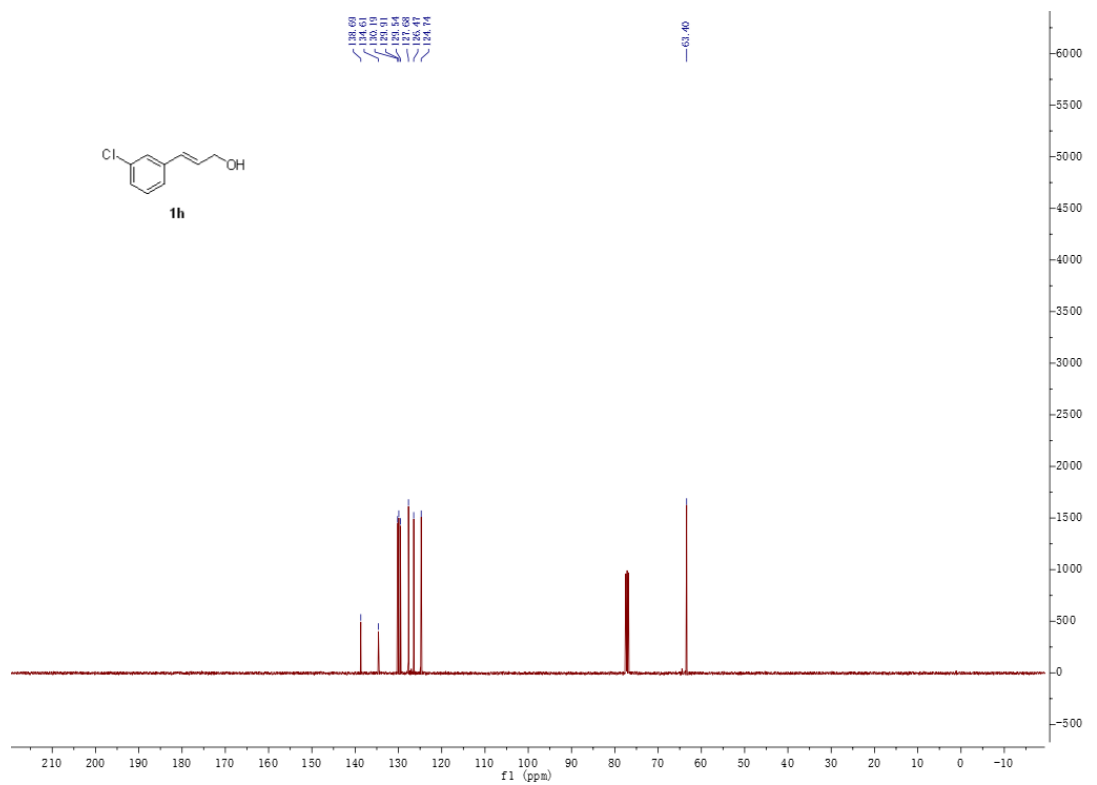



### $^1\text{H}$ NMR of **1i**

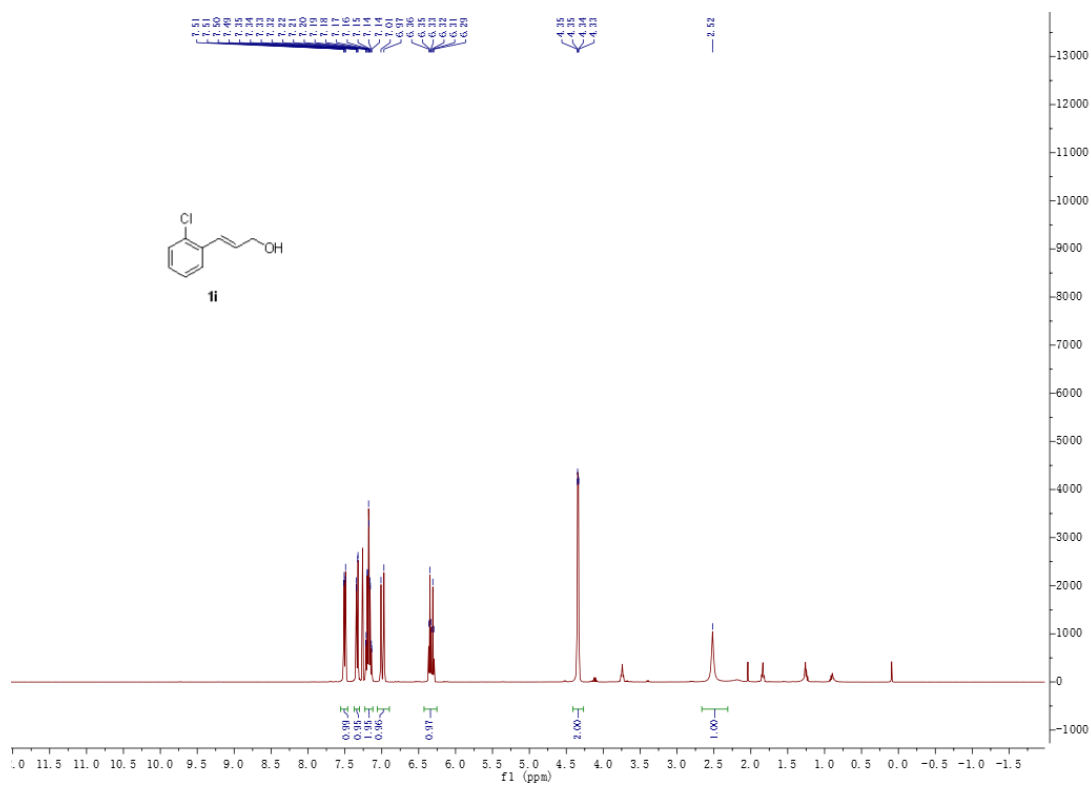

### $^{13}\text{C}$ NMR of **1i**

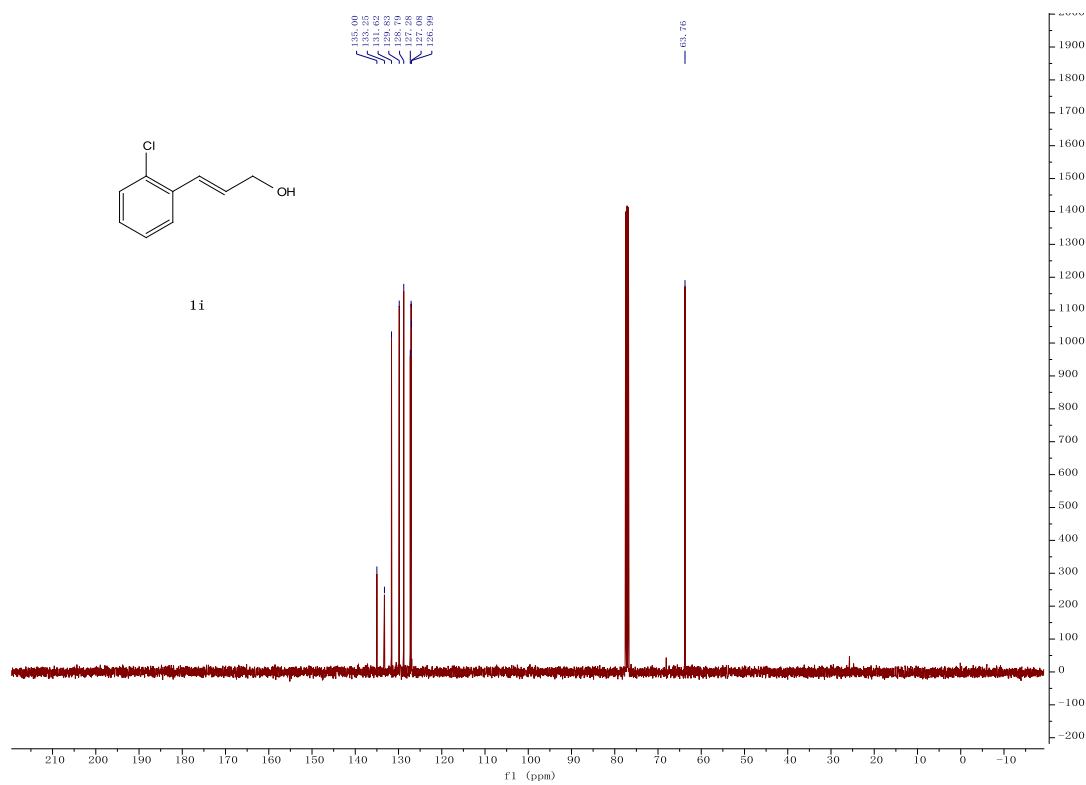

### <sup>1</sup>H NMR of 1j

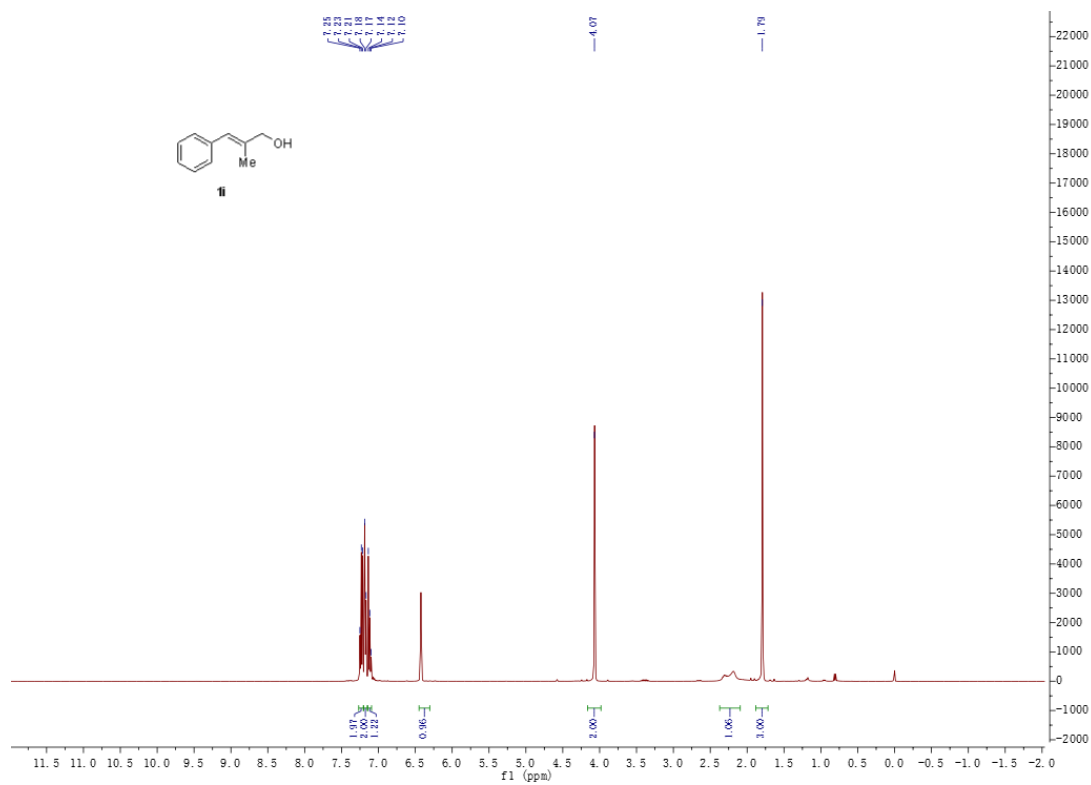

### <sup>13</sup>C NMR of 1j

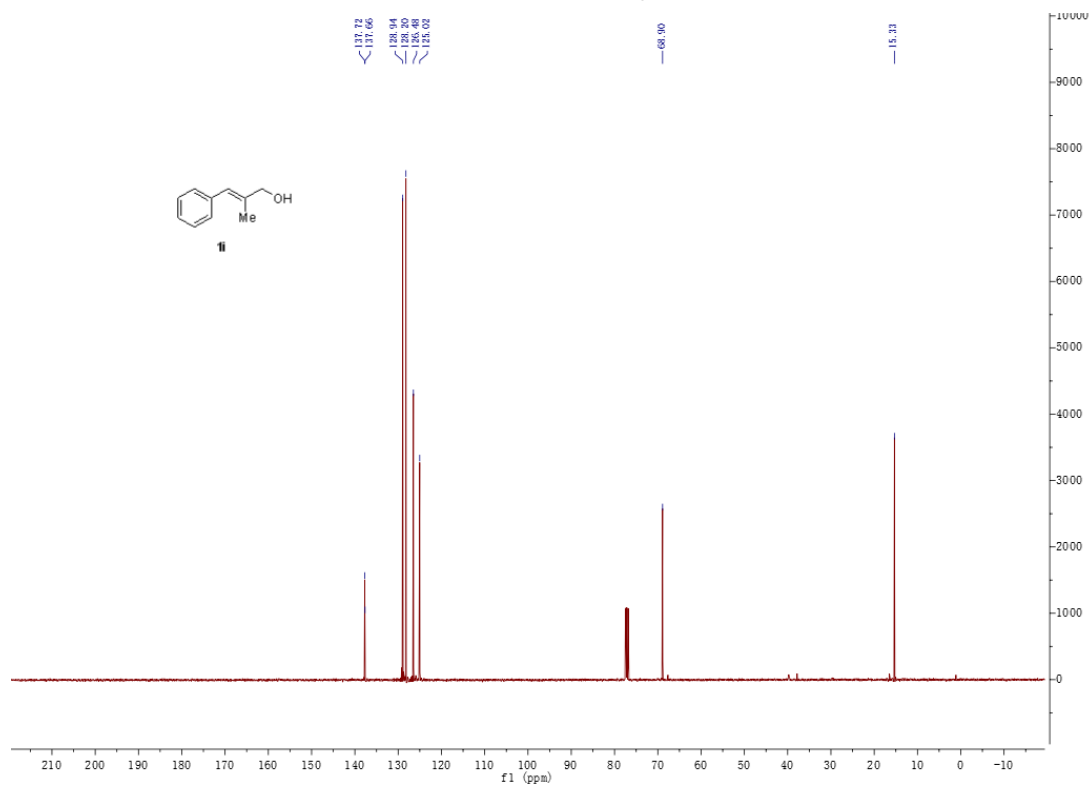

### <sup>1</sup>H NMR of **1k**

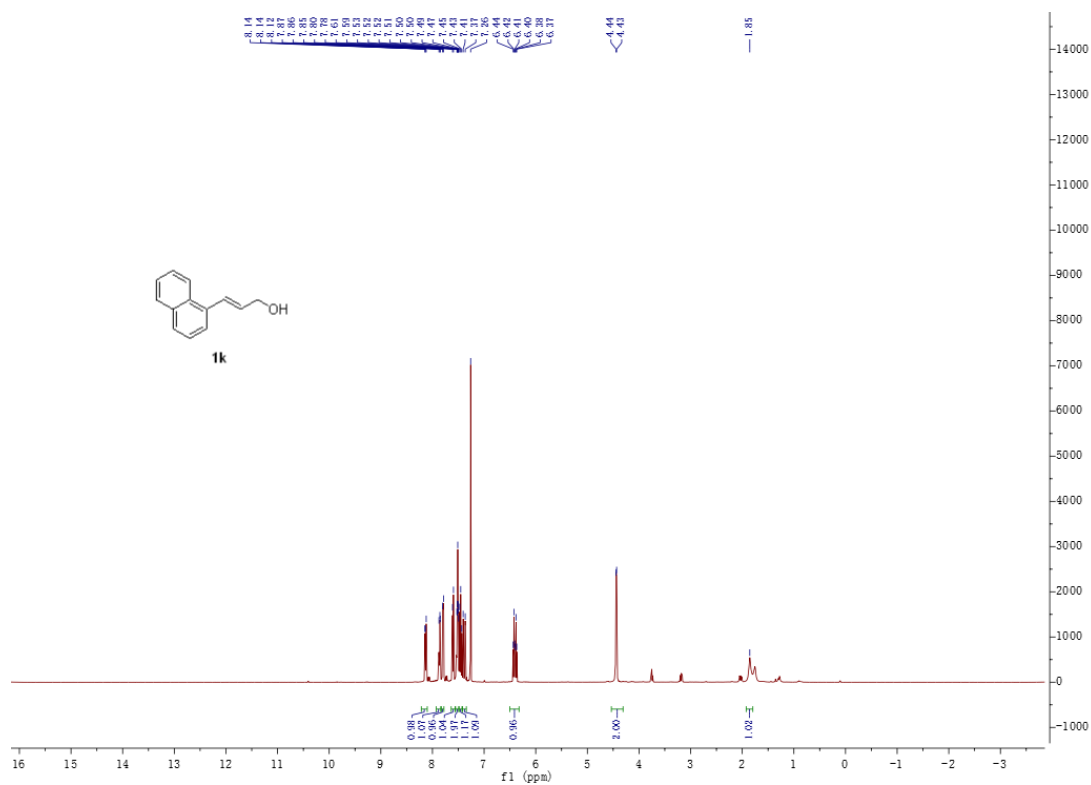

### <sup>13</sup>C NMR of **1k**

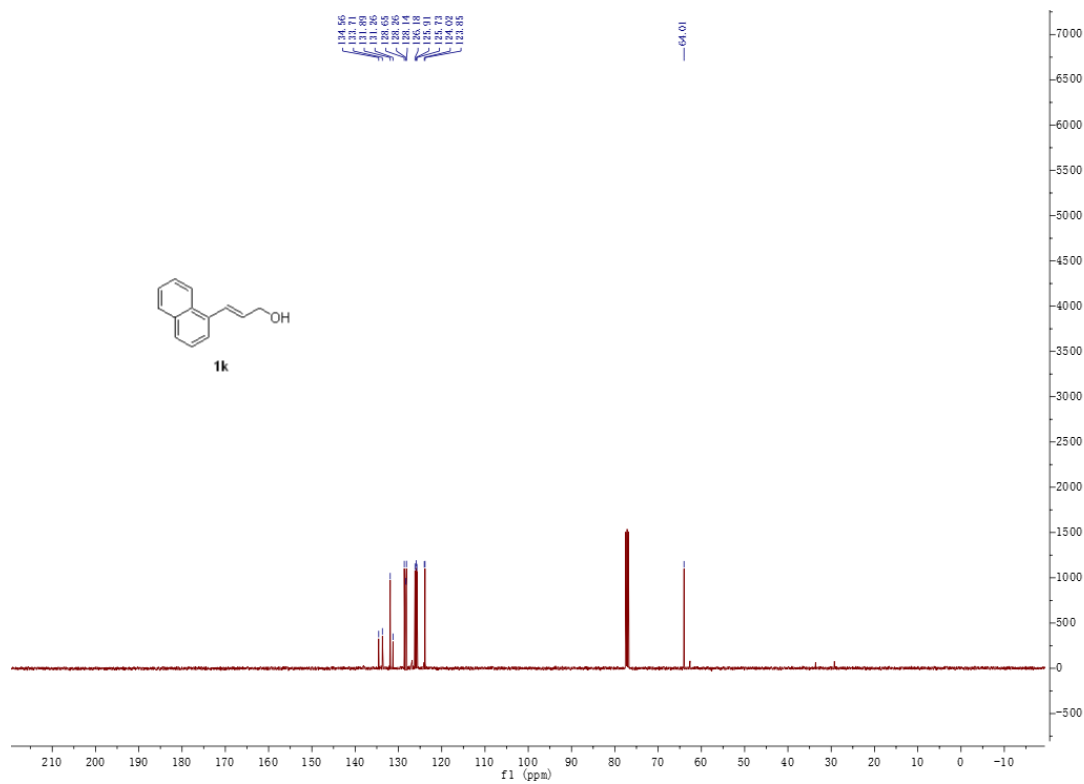

### <sup>1</sup>H NMR of **11**

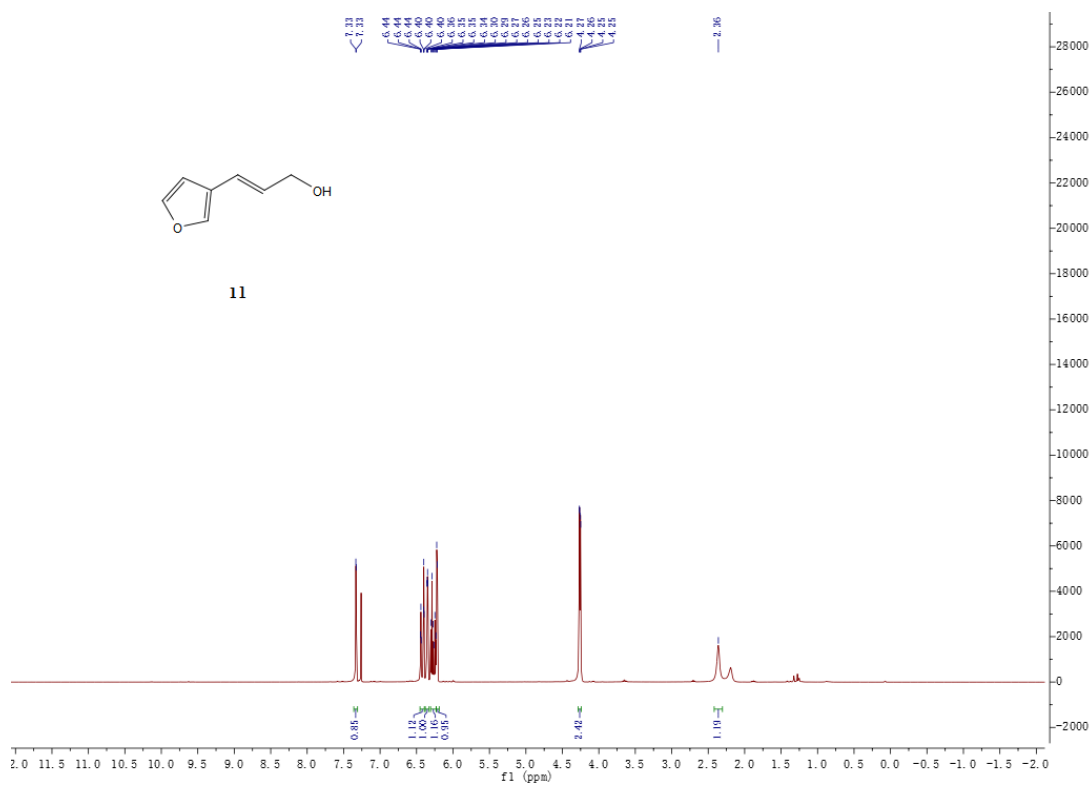

### <sup>13</sup>C NMR of **11**

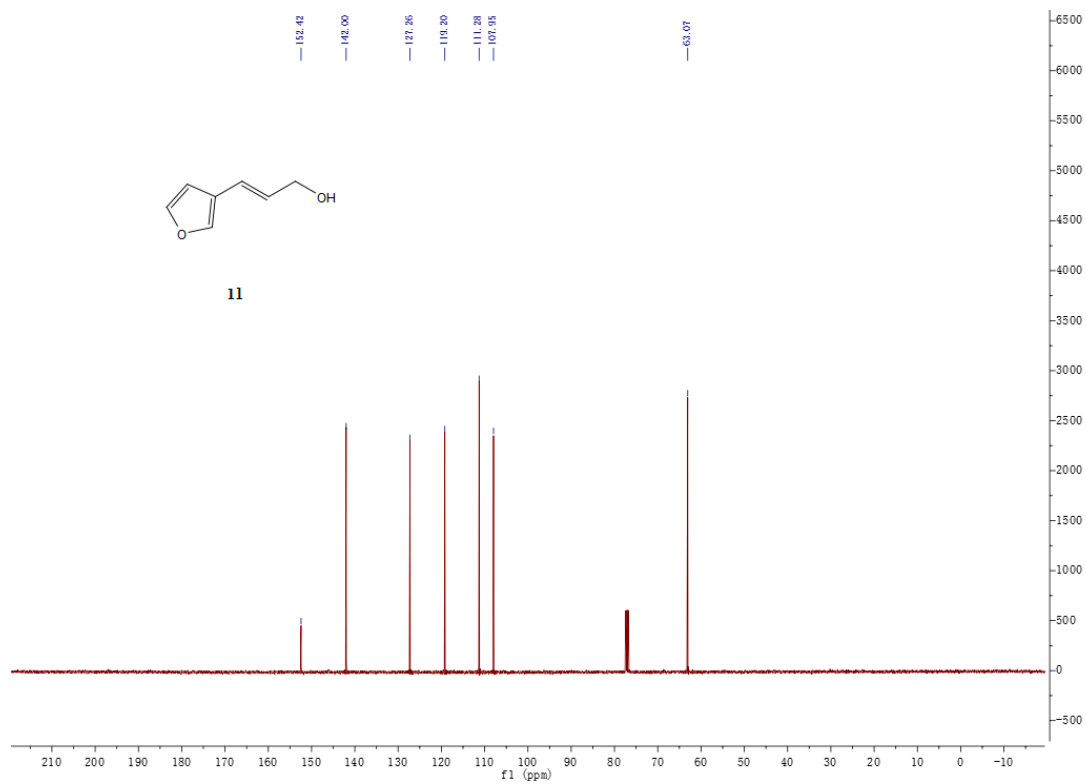

### <sup>1</sup>H NMR of 1m

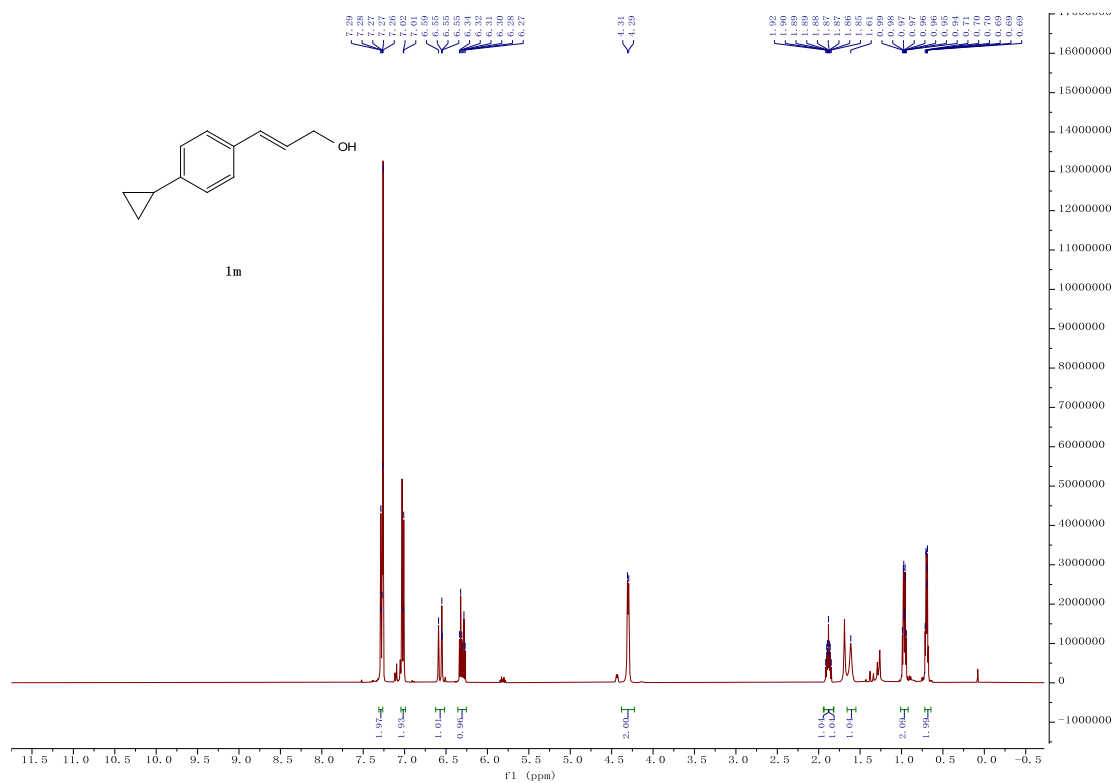

### <sup>13</sup>C NMR of 1m

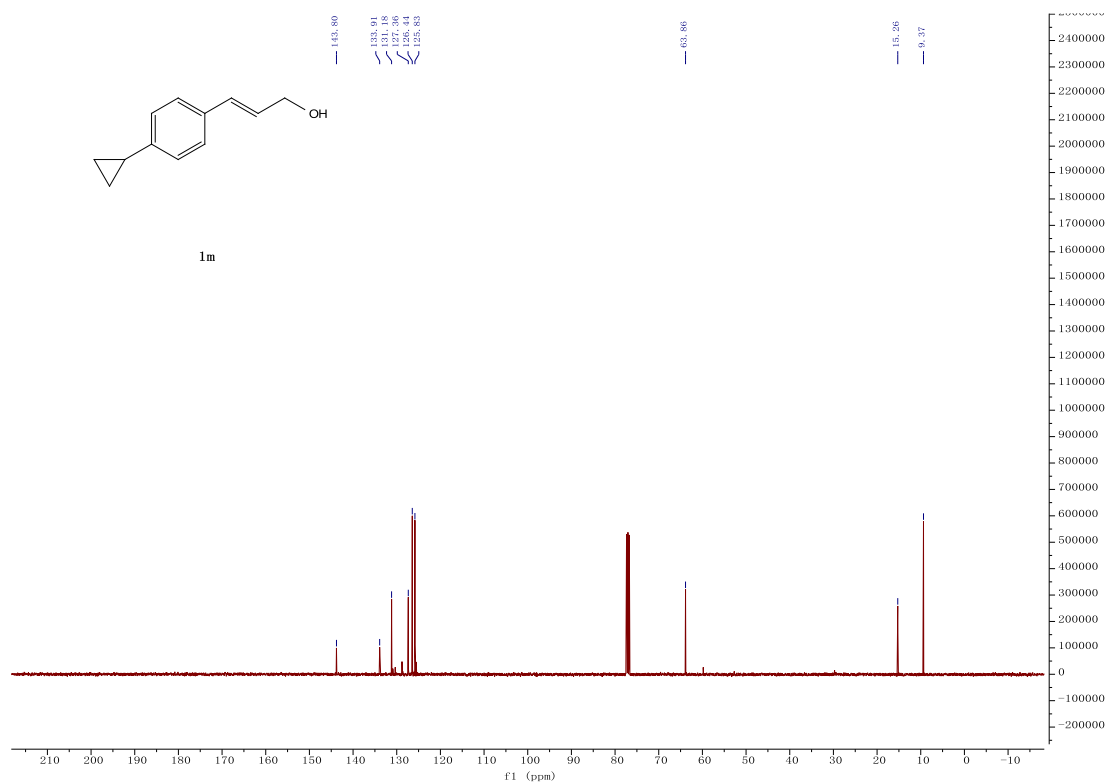

### <sup>1</sup>H NMR of **1n**

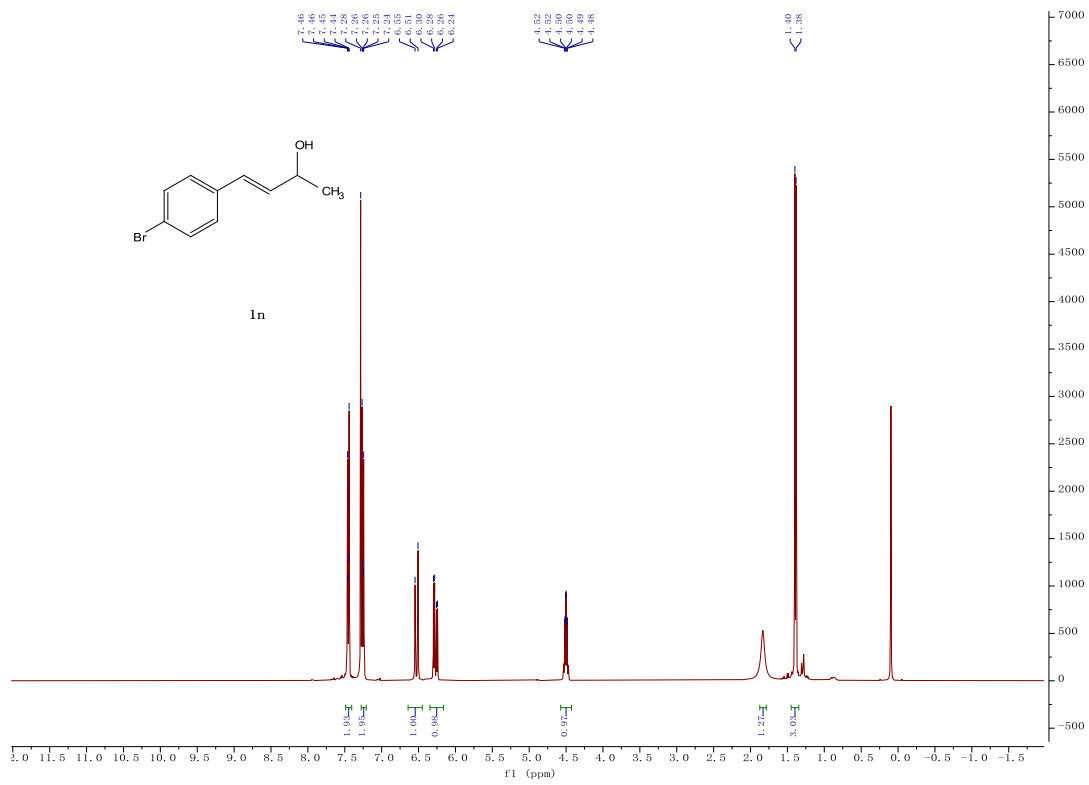

### <sup>13</sup>C NMR of **1n**

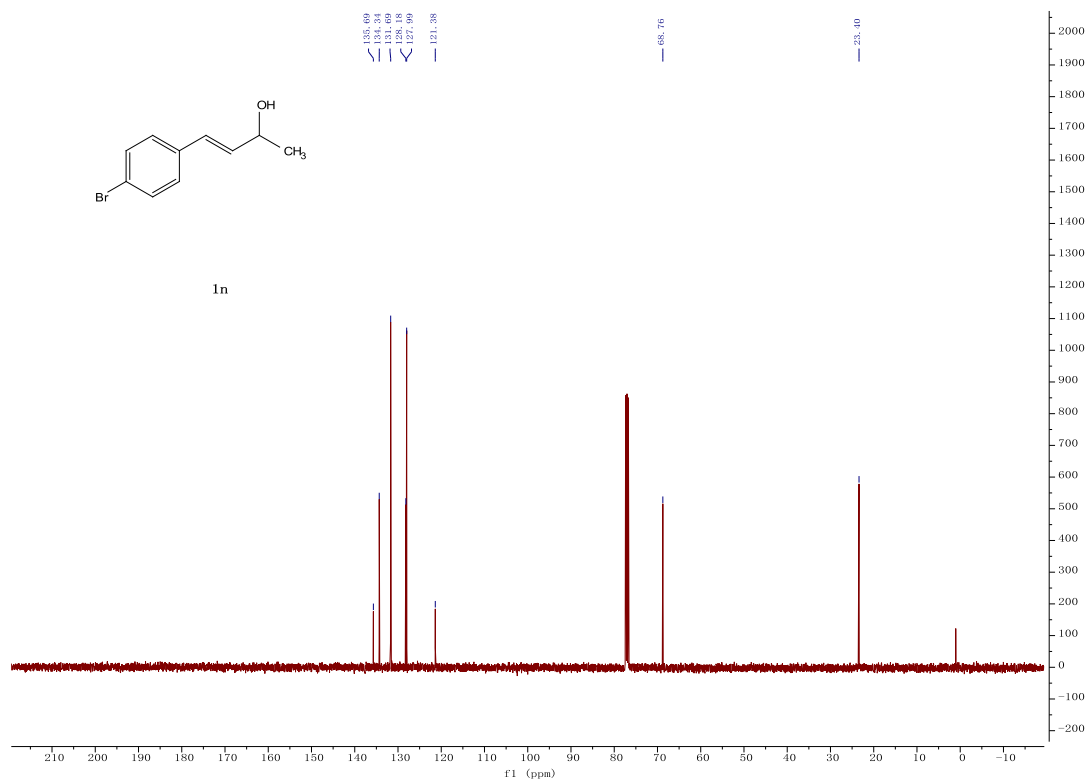

### <sup>1</sup>H NMR of 1o

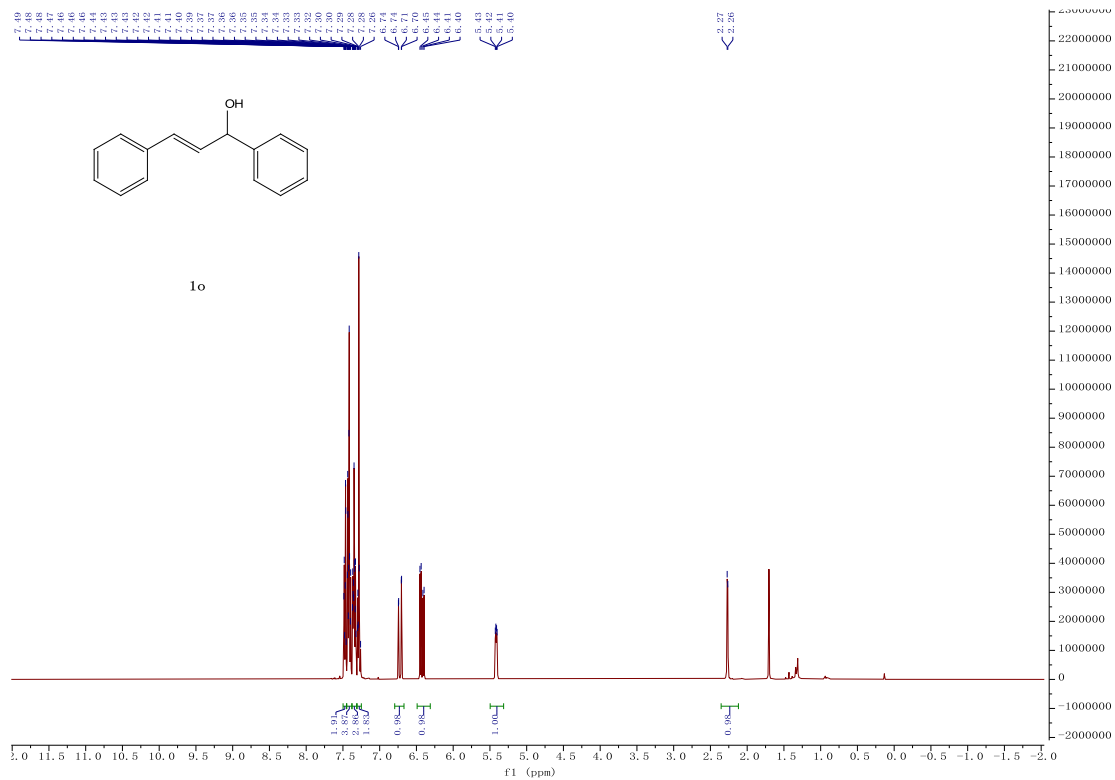

### <sup>13</sup>C NMR of 1o

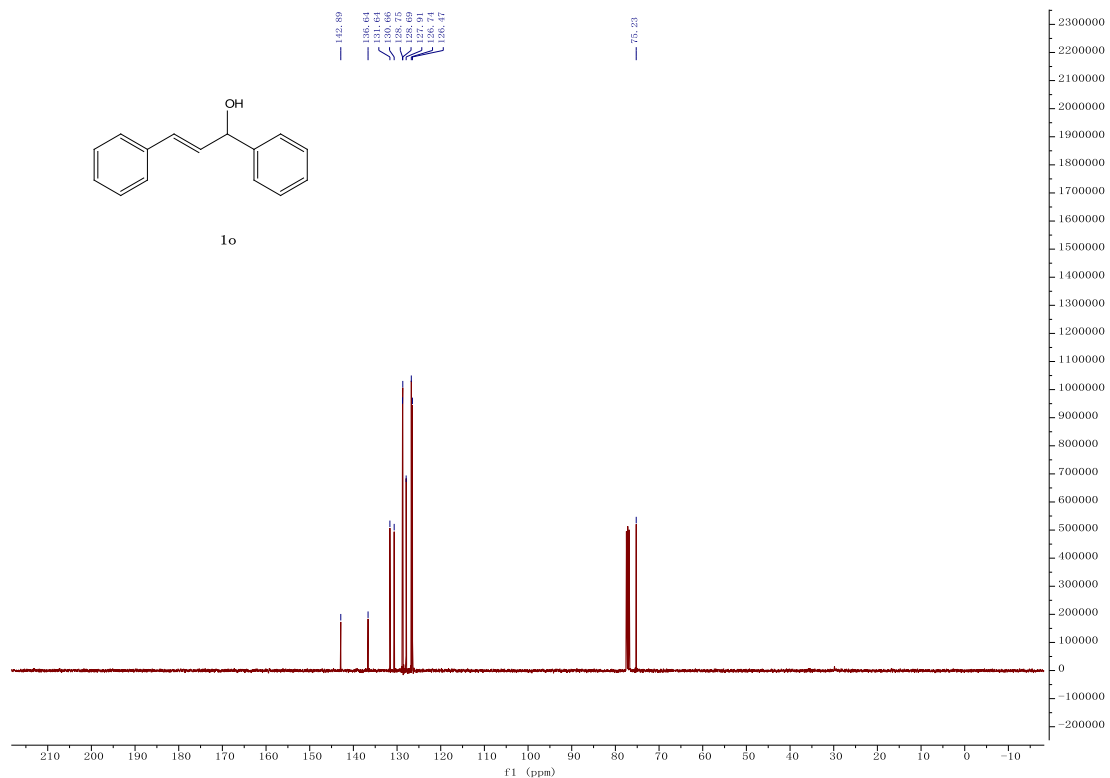

## 10. Crystallographic details of 5n

|                                      |                                    |
|--------------------------------------|------------------------------------|
| Identification code:                 | 2265350                            |
| Empirical formula:                   | C <sub>18</sub> H <sub>19</sub> NO |
| Formula weight:                      | 265.34                             |
| Temperature/K:                       | 150                                |
| Crystal system:                      | monoclinic                         |
| Space group:                         | P2 <sub>1</sub> /c                 |
| a/Å:                                 | 7.4178(1)                          |
| b/Å:                                 | 10.2857(1)                         |
| c/Å:                                 | 18.5504(2)                         |
| α/°:                                 | 90                                 |
| β/°:                                 | 94.816(1)                          |
| γ/°:                                 | 90                                 |
| Volume/Å <sup>3</sup> :              | 1410.35(3)                         |
| Z:                                   | 4                                  |
| ρ <sub>calc</sub> /cm <sup>3</sup> : | 1.250                              |
| μ/mm <sup>-1</sup> :                 | 0.598                              |
| F(000):                              | 568.0                              |
| Theta range [°]                      | 4.2430-74.0430                     |
| Reflections collected                | 13805                              |

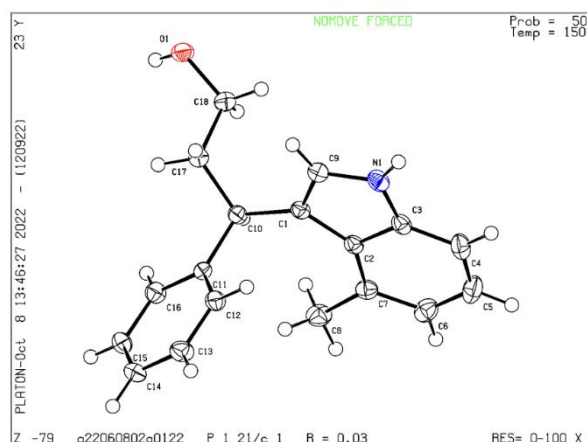

## 11. Cartesian coordinates

CsOH sol\_energy=-96.059062933

| Coordinates (Angstroms) |           |           |          |
|-------------------------|-----------|-----------|----------|
| ATOM                    | X         | Y         | Z        |
| O                       | 0.011901  | 2.265740  | 0.000000 |
| H                       | -0.749765 | 2.867666  | 0.000000 |
| Cs                      | 0.011901  | -0.381702 | 0.000000 |

H2O sol\_energy=-76.4594743887

| Coordinates (Angstroms) |          |           |           |
|-------------------------|----------|-----------|-----------|
| ATOM                    | X        | Y         | Z         |
| O                       | 0.000000 | 0.000000  | 0.119419  |
| H                       | 0.000000 | 0.762666  | -0.477675 |
| H                       | 0.000000 | -0.762666 | -0.477675 |



-----  
iButOH sol\_energy=-233.661520971  
-----

| Coordinates (Angstroms) |           |           |           |
|-------------------------|-----------|-----------|-----------|
| ATOM                    | X         | Y         | Z         |
| C                       | -0.005096 | -0.000001 | 0.015171  |
| C                       | -1.488422 | -0.000232 | -0.360458 |
| H                       | -1.614666 | -0.000231 | -1.448360 |
| H                       | -1.981353 | -0.887094 | 0.051070  |
| H                       | -1.981632 | 0.886461  | 0.051103  |
| C                       | 0.691120  | 1.264786  | -0.509100 |
| H                       | 0.211169  | 2.157605  | -0.095234 |
| H                       | 1.748496  | 1.275614  | -0.212635 |
| H                       | 0.651742  | 1.319946  | -1.603231 |
| C                       | 0.691529  | -1.264545 | -0.509142 |
| H                       | 1.748918  | -1.275020 | -0.212707 |
| H                       | 0.211893  | -2.157537 | -0.095282 |
| H                       | 0.652143  | -1.319696 | -1.603272 |
| O                       | 0.009960  | -0.000021 | 1.451996  |
| H                       | 0.938819  | 0.000069  | 1.733758  |

-----

iButOK sol\_energy=-261.41943801  
-----

| Coordinates (Angstroms) |          |           |           |
|-------------------------|----------|-----------|-----------|
| ATOM                    | X        | Y         | Z         |
| C                       | 1.039446 | 0.000000  | -0.030029 |
| C                       | 2.163951 | -0.000220 | -1.102100 |
| H                       | 3.175389 | -0.000250 | -0.670527 |
| H                       | 2.055201 | -0.886180 | -1.738991 |
| H                       | 2.055339 | 0.885607  | -1.739197 |
| C                       | 1.219902 | 1.259738  | 0.864120  |
| H                       | 1.083877 | 2.159869  | 0.251680  |
| H                       | 0.448211 | 1.265553  | 1.649281  |
| H                       | 2.201891 | 1.317958  | 1.355282  |
| C                       | 1.219793 | -1.259479 | 0.864507  |
| H                       | 0.448151 | -1.264932 | 1.649718  |
| H                       | 1.083609 | -2.159791 | 0.252369  |
| H                       | 2.201805 | -1.317672 | 1.355627  |

|   |           |           |           |
|---|-----------|-----------|-----------|
| O | -0.186342 | -0.000040 | -0.632894 |
| K | -2.480068 | -0.000004 | -0.046373 |

-----  
iButONa sol\_energy=-395.38797907500003  
-----

| Coordinates (Angstroms) |           |           |           |
|-------------------------|-----------|-----------|-----------|
| ATOM                    | X         | Y         | Z         |
| C                       | 0.613022  | -0.000001 | -0.007552 |
| C                       | 1.405366  | -0.001763 | -1.337906 |
| H                       | 2.493671  | -0.001914 | -1.186016 |
| H                       | 1.135558  | -0.889012 | -1.923397 |
| H                       | 1.136078  | 0.884330  | -1.925379 |
| C                       | 0.997300  | 1.260654  | 0.804675  |
| H                       | 0.719829  | 2.158411  | 0.238494  |
| H                       | 0.438539  | 1.270323  | 1.749888  |
| H                       | 2.070054  | 1.313494  | 1.036503  |
| C                       | 0.996883  | -1.258797 | 0.807751  |
| H                       | 0.438365  | -1.265786 | 1.753132  |
| H                       | 0.718817  | -2.157857 | 0.243931  |
| H                       | 2.069672  | -1.311587 | 1.039436  |
| O                       | -0.737309 | -0.000102 | -0.272088 |
| Na                      | -2.672504 | -0.000014 | -0.041063 |

-----  
RC sol\_energy=-424.192316223  
-----

| Coordinates (Angstroms) |          |           |           |
|-------------------------|----------|-----------|-----------|
| ATOM                    | X        | Y         | Z         |
| C                       | 2.881451 | -1.003936 | -0.174886 |
| C                       | 1.519588 | -1.276305 | -0.048300 |
| C                       | 0.579589 | -0.241378 | 0.103548  |
| C                       | 1.055730 | 1.083477  | 0.131596  |
| C                       | 2.414519 | 1.357009  | 0.004285  |
| C                       | 3.335457 | 0.315443  | -0.150405 |
| H                       | 3.586752 | -1.822440 | -0.292028 |
| H                       | 1.173075 | -2.307302 | -0.069037 |
| H                       | 0.358316 | 1.906053  | 0.259521  |
| H                       | 2.759197 | 2.387488  | 0.029267  |
| H                       | 4.395635 | 0.532579  | -0.247611 |

|   |           |           |           |
|---|-----------|-----------|-----------|
| C | -1.890922 | 0.250115  | 0.297796  |
| H | -1.754829 | 1.329828  | 0.253335  |
| C | -3.318367 | -0.203518 | 0.404208  |
| H | -3.778449 | 0.179628  | 1.323391  |
| O | -4.126641 | 0.317233  | -0.652399 |
| C | -0.844517 | -0.587229 | 0.223497  |
| H | -3.367063 | -1.304500 | 0.448289  |
| H | -1.051987 | -1.658665 | 0.251945  |
| H | -3.702698 | 0.057401  | -1.485922 |

N-C-1 sol\_energy=-443.800490095

| Coordinates (Angstroms) |           |           |           |
|-------------------------|-----------|-----------|-----------|
| ATOM                    | X         | Y         | Z         |
| C                       | -3.692007 | -0.423980 | 0.992830  |
| C                       | -2.582891 | 0.380817  | 1.249469  |
| C                       | -1.742777 | 0.839593  | 0.211324  |
| C                       | -2.072343 | 0.437302  | -1.104407 |
| C                       | -3.181290 | -0.366155 | -1.360168 |
| C                       | -4.001236 | -0.806118 | -0.315253 |
| H                       | -4.320235 | -0.751262 | 1.818186  |
| H                       | -2.359373 | 0.677042  | 2.272784  |
| H                       | -1.456298 | 0.772077  | -1.935014 |
| H                       | -3.411213 | -0.648363 | -2.385385 |
| H                       | -4.866705 | -1.430761 | -0.518613 |
| C                       | -0.556950 | 1.638165  | 0.536735  |
| H                       | -0.369921 | 1.770978  | 1.606193  |
| C                       | 0.350093  | 2.162637  | -0.321355 |
| H                       | 0.198022  | 2.075628  | -1.398785 |
| C                       | 1.765796  | 2.572336  | 0.050204  |
| H                       | 1.789142  | 2.798806  | 1.149698  |
| H                       | 2.020991  | 3.537977  | -0.447337 |
| O                       | 2.520850  | 1.507606  | -0.348362 |
| Cs                      | 1.579826  | -1.081283 | 0.054344  |

N-K-1 sol\_energy=-451.953934664

| Coordinates (Angstroms) |   |   |   |
|-------------------------|---|---|---|
| ATOM                    | X | Y | Z |

```

-----
C      3.199842   -0.109729    0.985410
C      1.915196   -0.617732    1.173119
C      0.967989   -0.638508    0.127244
C      1.374662   -0.112284   -1.120462
C      2.659310    0.394076   -1.307702
C      3.582777    0.401498   -0.257251
H      3.905662   -0.115485    1.812569
H      1.632632   -1.019294    2.144385
H      0.679524   -0.116716   -1.956245
H      2.943404    0.782997   -2.282880
H      4.583718    0.796673   -0.406637
C     -0.389376   -1.135028    0.387620
H     -0.595579   -1.388766    1.431535
C     -1.409768   -1.259475   -0.493545
H     -1.247086   -1.047502   -1.552344
C     -2.878787   -1.338719   -0.110043
H     -2.950634   -1.755502    0.926561
H     -3.393158   -2.082183   -0.760445
O     -3.335936   -0.054794   -0.255229
K     -1.736951    1.730501    0.335736
-----

```

N-N-1 sol\_energy=-585.920347874

```

-----
                        Coordinates (Angstroms)
ATOM      X          Y          Z
-----
C      3.110141   -0.784236    0.613358
C      1.780548   -1.194766    0.524621
C      0.817633   -0.420477   -0.151526
C      1.244364    0.795040   -0.726847
C      2.572850    1.205162   -0.638734
C      3.515346    0.418892    0.031498
H      3.831322   -1.406420    1.137231
H      1.476484   -2.136689    0.976401
H      0.529497    1.420256   -1.255697
H      2.875143    2.144282   -1.095585
H      4.550528    0.741538    0.099532
C     -0.579275   -0.883902   -0.199134
H     -0.798839   -1.756093    0.423697
C     -1.602762   -0.364823   -0.915905
H     -1.428960    0.481367   -1.584776
-----

```

|    |           |           |           |
|----|-----------|-----------|-----------|
| C  | -3.070683 | -0.677247 | -0.664474 |
| H  | -3.141794 | -1.698227 | -0.221174 |
| H  | -3.593813 | -0.738439 | -1.642164 |
| O  | -3.562499 | 0.326886  | 0.146112  |
| Na | -2.048050 | 1.070134  | 1.341500  |

-----

N-C-2    sol\_energy=-867.999967287

-----

| Coordinates (Angstroms) |           |           |           |
|-------------------------|-----------|-----------|-----------|
| ATOM                    | X         | Y         | Z         |
| C                       | 4.731596  | -2.399096 | -1.027781 |
| C                       | 3.448988  | -1.856415 | -1.107210 |
| C                       | 2.440221  | -2.219014 | -0.193750 |
| C                       | 2.767251  | -3.165687 | 0.796866  |
| C                       | 4.046588  | -3.710064 | 0.875874  |
| C                       | 5.039486  | -3.329024 | -0.032781 |
| H                       | 5.489836  | -2.096868 | -1.746462 |
| H                       | 3.220864  | -1.124718 | -1.878962 |
| H                       | 2.006076  | -3.482650 | 1.503743  |
| H                       | 4.271096  | -4.440421 | 1.649601  |
| H                       | 6.036716  | -3.756135 | 0.032042  |
| C                       | 1.115487  | -1.588976 | -0.301031 |
| H                       | 0.956231  | -1.015245 | -1.216807 |
| C                       | 0.119358  | -1.606552 | 0.600173  |
| H                       | 0.213680  | -2.157891 | 1.536046  |
| C                       | -1.222949 | -0.917799 | 0.424949  |
| H                       | -1.194598 | -0.428462 | -0.602649 |
| H                       | -1.152132 | 0.012132  | 1.108053  |
| O                       | -2.279778 | -1.693477 | 0.670622  |
| C                       | 4.252400  | 1.603446  | -0.334129 |
| C                       | 3.008044  | 1.410247  | 0.269648  |
| C                       | 2.160287  | 2.493881  | 0.529468  |
| C                       | 2.589334  | 3.780727  | 0.174175  |
| C                       | 3.832065  | 3.978993  | -0.429003 |
| C                       | 4.668153  | 2.888740  | -0.686653 |
| H                       | 4.888143  | 0.742750  | -0.524099 |
| H                       | 2.690193  | 0.408175  | 0.537849  |
| H                       | 1.944951  | 4.634812  | 0.376073  |
| H                       | 4.150093  | 4.984381  | -0.694110 |
| H                       | 5.637129  | 3.042839  | -1.154596 |
| C                       | -1.716059 | 2.167878  | 0.703208  |
| H                       | -1.782286 | 2.174143  | 1.812689  |

|    |           |           |           |
|----|-----------|-----------|-----------|
| O  | -2.734065 | 2.073408  | 0.027236  |
| Cs | -4.518684 | -0.418187 | -0.326819 |
| C  | 0.796278  | 2.274326  | 1.147389  |
| H  | 0.753315  | 1.280695  | 1.607063  |
| H  | 0.625394  | 3.008186  | 1.947866  |
| C  | -0.339820 | 2.384003  | 0.115744  |
| H  | -0.201797 | 1.659119  | -0.695988 |
| H  | -0.334807 | 3.378325  | -0.356130 |

N-K-2 sol\_energy=-876.165270389

| Coordinates (Angstroms) |           |           |           |
|-------------------------|-----------|-----------|-----------|
| ATOM                    | X         | Y         | Z         |
| C                       | -2.135433 | 2.732418  | -1.411068 |
| C                       | -2.721145 | 1.670338  | -0.721298 |
| C                       | -2.441422 | 1.457101  | 0.634624  |
| C                       | -1.564239 | 2.334773  | 1.285612  |
| C                       | -0.972919 | 3.397258  | 0.597667  |
| C                       | -1.256183 | 3.597474  | -0.755203 |
| H                       | -2.354110 | 2.873896  | -2.465905 |
| H                       | -3.367590 | 0.972607  | -1.247059 |
| H                       | -1.337237 | 2.178987  | 2.338656  |
| H                       | -0.290956 | 4.065553  | 1.117167  |
| H                       | -0.792352 | 4.418529  | -1.294793 |
| C                       | -2.434850 | -2.260004 | 1.679405  |
| H                       | -3.492835 | -2.364810 | 2.005381  |
| H                       | -1.426877 | 0.074049  | -2.852888 |
| O                       | -1.691193 | -3.236062 | 1.745254  |
| C                       | 4.868614  | 0.089532  | 0.332200  |
| C                       | 3.918929  | -0.266092 | -0.626281 |
| C                       | 2.579596  | 0.157731  | -0.527770 |
| C                       | 2.230672  | 0.965358  | 0.576362  |
| C                       | 3.178808  | 1.319798  | 1.532130  |
| C                       | 4.503826  | 0.883540  | 1.420665  |
| H                       | 5.895421  | -0.252018 | 0.225633  |
| H                       | 4.217031  | -0.878564 | -1.475708 |
| H                       | 1.212032  | 1.328595  | 0.678419  |
| H                       | 2.883119  | 1.946250  | 2.370536  |
| H                       | 5.240016  | 1.163941  | 2.169102  |
| C                       | 1.605926  | -0.273072 | -1.544046 |
| H                       | 2.019349  | -0.880945 | -2.355198 |

|   |           |           |           |
|---|-----------|-----------|-----------|
| C | 0.283100  | -0.013675 | -1.558969 |
| H | -0.154761 | 0.602323  | -0.775755 |
| C | -0.740728 | -0.699576 | -2.442711 |
| H | -0.216151 | -1.123797 | -3.332352 |
| O | -1.382496 | -1.650466 | -1.669898 |
| K | 0.162323  | -3.151642 | -0.324437 |
| C | -2.976580 | 0.232829  | 1.345722  |
| H | -3.970392 | -0.024422 | 0.957468  |
| H | -3.092998 | 0.437718  | 2.418301  |
| C | -2.020725 | -0.948874 | 1.115256  |
| H | -1.014509 | -0.707961 | 1.488558  |
| H | -1.882311 | -1.117664 | -0.001899 |

-----

N-N-2 sol\_energy=-1010.12322654

-----

Coordinates (Angstroms)

| ATOM | X         | Y         | Z         |
|------|-----------|-----------|-----------|
| C    | 1.706336  | 2.970288  | -0.312936 |
| C    | 0.811885  | 2.063231  | 0.258901  |
| C    | -0.518220 | 2.425033  | 0.509052  |
| C    | -0.930875 | 3.723504  | 0.177496  |
| C    | -0.040709 | 4.632380  | -0.396064 |
| C    | 1.282499  | 4.257875  | -0.645592 |
| H    | 2.733408  | 2.663641  | -0.493604 |
| H    | 1.152307  | 1.064196  | 0.513683  |
| H    | -1.956617 | 4.030184  | 0.372217  |
| H    | -0.379457 | 5.634600  | -0.646209 |
| H    | 1.975662  | 4.965819  | -1.092168 |
| C    | -3.569385 | 0.026853  | 0.818135  |
| H    | -3.423012 | -0.220591 | 1.889247  |
| H    | -1.984111 | -1.300356 | 0.480362  |
| O    | -4.467038 | -0.530999 | 0.182362  |
| Na   | -4.406664 | -2.614424 | -0.614030 |
| C    | 4.518545  | -0.575363 | -0.495465 |
| C    | 3.155374  | -0.571969 | -0.790664 |
| C    | 2.280432  | -1.520553 | -0.226823 |
| C    | 2.830357  | -2.482109 | 0.643052  |
| C    | 4.191613  | -2.489212 | 0.934937  |
| C    | 5.045136  | -1.534997 | 0.370611  |
| H    | 5.169489  | 0.170527  | -0.945093 |
| H    | 2.751990  | 0.178929  | -1.466651 |

|   |           |           |           |
|---|-----------|-----------|-----------|
| H | 2.184663  | -3.232116 | 1.090641  |
| H | 4.591487  | -3.243884 | 1.607803  |
| H | 6.106665  | -1.542947 | 0.602947  |
| C | 0.849916  | -1.448464 | -0.555023 |
| H | 0.592757  | -0.671955 | -1.278187 |
| C | -0.160022 | -2.183692 | -0.061693 |
| H | 0.007097  | -2.988934 | 0.653467  |
| C | -1.611972 | -1.932037 | -0.409064 |
| H | -1.624250 | -1.178773 | -1.242558 |
| O | -2.370212 | -3.024576 | -0.618233 |
| C | -1.474460 | 1.426875  | 1.128452  |
| H | -0.945305 | 0.480307  | 1.285158  |
| H | -1.792907 | 1.778022  | 2.120816  |
| C | -2.726710 | 1.154622  | 0.273348  |
| H | -2.458508 | 0.915260  | -0.761785 |
| H | -3.368492 | 2.047731  | 0.227253  |

-----

N-C-TS2-3     sol\_energy=-867.993556281

-----

|      | Coordinates (Angstroms) |           |           |
|------|-------------------------|-----------|-----------|
| ATOM | X                       | Y         | Z         |
| C    | 4.742320                | -2.466324 | -1.052950 |
| C    | 3.427879                | -2.057705 | -1.275122 |
| C    | 2.436367                | -2.207800 | -0.286724 |
| C    | 2.815897                | -2.792421 | 0.937713  |
| C    | 4.127422                | -3.203131 | 1.159951  |
| C    | 5.100284                | -3.041557 | 0.167854  |
| H    | 5.487114                | -2.333069 | -1.833552 |
| H    | 3.160275                | -1.598014 | -2.223694 |
| H    | 2.077798                | -2.918486 | 1.724287  |
| H    | 4.395114                | -3.648047 | 2.115069  |
| H    | 6.124035                | -3.358749 | 0.346997  |
| C    | 1.081230                | -1.712754 | -0.557931 |
| H    | 0.950076                | -1.259388 | -1.542362 |
| C    | 0.013463                | -1.732384 | 0.258841  |
| H    | 0.051652                | -2.177687 | 1.252135  |
| C    | -1.318213               | -1.139048 | -0.103976 |
| H    | -1.315560               | -0.787706 | -1.173664 |
| H    | -1.166552               | 0.069942  | 0.363965  |
| O    | -2.392142               | -1.685783 | 0.354944  |
| C    | 4.594241                | 1.651555  | -0.275873 |



|    |           |           |           |
|----|-----------|-----------|-----------|
| C  | 3.346649  | 1.264562  | 0.218259  |
| C  | 2.359191  | 2.214472  | 0.507541  |
| C  | 2.657259  | 3.569193  | 0.297547  |
| C  | 3.902975  | 3.961814  | -0.192986 |
| C  | 4.877210  | 3.002346  | -0.484810 |
| H  | 5.339141  | 0.890653  | -0.495519 |
| H  | 3.138597  | 0.212526  | 0.380991  |
| H  | 1.903565  | 4.321687  | 0.521694  |
| H  | 4.115193  | 5.017271  | -0.346419 |
| H  | 5.847728  | 3.307760  | -0.867810 |
| C  | -1.482314 | 1.486292  | 0.428438  |
| H  | -1.572006 | 1.437384  | 1.544350  |
| O  | -2.521948 | 1.710730  | -0.257271 |
| Cs | -4.768458 | -0.154270 | -0.121921 |
| C  | 0.994071  | 1.788467  | 1.002280  |
| H  | 1.021021  | 0.730274  | 1.286564  |
| H  | 0.731982  | 2.353486  | 1.908502  |
| C  | -0.115278 | 1.993235  | -0.043219 |
| H  | 0.147509  | 1.491845  | -0.983842 |
| H  | -0.222668 | 3.060730  | -0.282391 |

-----

N-K-TS2-3     sol\_energy=-876.151995659

-----

| Coordinates (Angstroms) |           |           |           |
|-------------------------|-----------|-----------|-----------|
| ATOM                    | X         | Y         | Z         |
| C                       | 3.460058  | 1.451239  | -0.643304 |
| C                       | 2.185936  | 1.341493  | -1.195830 |
| C                       | 1.065674  | 1.899789  | -0.562288 |
| C                       | 1.263973  | 2.576147  | 0.648249  |
| C                       | 2.539839  | 2.689704  | 1.207941  |
| C                       | 3.642712  | 2.127171  | 0.565331  |
| H                       | 4.305248  | 0.984611  | -1.141384 |
| H                       | 2.049856  | 0.789944  | -2.123017 |
| H                       | 0.416080  | 3.016055  | 1.165637  |
| H                       | 2.668059  | 3.215908  | 2.150956  |
| H                       | 4.633407  | 2.204454  | 1.005630  |
| C                       | -2.794514 | 1.285505  | -0.862828 |
| H                       | -2.852781 | 1.454043  | -1.963073 |
| H                       | -2.373459 | -0.102283 | -1.019127 |
| O                       | -3.866607 | 1.292608  | -0.189931 |
| C                       | 3.844992  | -2.399800 | -0.430594 |
| C                       | 2.539605  | -2.370901 | -0.920850 |

|   |           |           |           |
|---|-----------|-----------|-----------|
| C | 1.489062  | -1.816749 | -0.167806 |
| C | 1.798691  | -1.276956 | 1.095343  |
| C | 3.099472  | -1.305356 | 1.586040  |
| C | 4.131332  | -1.868586 | 0.827958  |
| H | 4.638241  | -2.835287 | -1.033224 |
| H | 2.323617  | -2.783696 | -1.904128 |
| H | 1.020669  | -0.794047 | 1.678016  |
| H | 3.315951  | -0.864423 | 2.555400  |
| H | 5.148491  | -1.880673 | 1.210549  |
| C | 0.136474  | -1.781187 | -0.737294 |
| H | 0.077464  | -2.016347 | -1.802284 |
| C | -1.009898 | -1.487662 | -0.101558 |
| H | -1.029334 | -1.284285 | 0.968734  |
| C | -2.350898 | -1.387478 | -0.771573 |
| H | -2.296793 | -1.718609 | -1.836721 |
| O | -3.397452 | -1.712216 | -0.088098 |
| K | -5.245031 | -0.461231 | 0.979828  |
| C | -0.304007 | 1.753167  | -1.198903 |
| H | -0.327380 | 0.798677  | -1.738101 |
| H | -0.436846 | 2.532887  | -1.964340 |
| C | -1.494979 | 1.799113  | -0.233942 |
| H | -1.684377 | 2.826427  | 0.108417  |
| H | -1.289188 | 1.204969  | 0.665013  |

-----

N-N-TS2-3     sol\_energy=-1010.11871547

-----

|      | Coordinates (Angstroms) |           |           |
|------|-------------------------|-----------|-----------|
| ATOM | X                       | Y         | Z         |
| C    | -1.942794               | -3.109996 | -0.283667 |
| C    | -1.134680               | -2.162674 | 0.346758  |
| C    | 0.236830                | -2.389829 | 0.533282  |
| C    | 0.777152                | -3.598148 | 0.071977  |
| C    | -0.027800               | -4.549214 | -0.558939 |
| C    | -1.391311               | -4.308778 | -0.741183 |
| H    | -3.002403               | -2.906885 | -0.419159 |
| H    | -1.572754               | -1.230242 | 0.692943  |
| H    | 1.837598                | -3.798373 | 0.202112  |
| H    | 0.412676                | -5.478762 | -0.910983 |
| H    | -2.016442               | -5.047429 | -1.235950 |
| C    | 3.096800                | 0.193984  | 1.025373  |
| H    | 2.709277                | 0.614448  | 1.980322  |

|    |           |           |           |
|----|-----------|-----------|-----------|
| H  | 2.148547  | 0.973019  | 0.228825  |
| O  | 4.271583  | 0.513196  | 0.660516  |
| Na | 4.663005  | 2.209155  | -0.583787 |
| C  | -4.435632 | 0.893918  | -0.348773 |
| C  | -3.100022 | 0.701902  | -0.700904 |
| C  | -2.094183 | 1.582266  | -0.257954 |
| C  | -2.478969 | 2.666282  | 0.554993  |
| C  | -3.812326 | 2.860304  | 0.903771  |
| C  | -4.799053 | 1.975505  | 0.455213  |
| H  | -5.192053 | 0.198625  | -0.703660 |
| H  | -2.822306 | -0.144165 | -1.325143 |
| H  | -1.726323 | 3.359782  | 0.918380  |
| H  | -4.085455 | 3.704287  | 1.532074  |
| H  | -5.838476 | 2.128712  | 0.732432  |
| C  | -0.703711 | 1.324012  | -0.650195 |
| H  | -0.558367 | 0.411237  | -1.230774 |
| C  | 0.388659  | 2.057132  | -0.372162 |
| H  | 0.340813  | 2.988633  | 0.189369  |
| C  | 1.765741  | 1.647266  | -0.801154 |
| H  | 1.720959  | 0.772461  | -1.495868 |
| O  | 2.640086  | 2.573563  | -1.067390 |
| C  | 1.084721  | -1.341707 | 1.225338  |
| H  | 0.562207  | -0.380293 | 1.156774  |
| H  | 1.147886  | -1.569581 | 2.299535  |
| C  | 2.509951  | -1.170747 | 0.668893  |
| H  | 2.521988  | -1.281200 | -0.422753 |
| H  | 3.189990  | -1.937906 | 1.064184  |

-----

N-C-3 sol\_energy=-868.0097216309999

-----

| Coordinates (Angstroms) |          |           |           |
|-------------------------|----------|-----------|-----------|
| ATOM                    | X        | Y         | Z         |
| C                       | 4.114240 | -2.095840 | -0.292380 |
| C                       | 2.795608 | -1.653471 | -0.375473 |
| C                       | 1.720084 | -2.539255 | -0.173472 |
| C                       | 2.006468 | -3.889375 | 0.109944  |
| C                       | 3.323213 | -4.331582 | 0.188132  |
| C                       | 4.382068 | -3.437084 | -0.011552 |
| H                       | 4.924282 | -1.388076 | -0.444507 |
| H                       | 2.593675 | -0.607447 | -0.587923 |
| H                       | 1.193177 | -4.591292 | 0.269814  |

|    |           |           |           |
|----|-----------|-----------|-----------|
| H  | 3.529107  | -5.375958 | 0.407222  |
| H  | 5.408771  | -3.787560 | 0.053266  |
| C  | 0.364348  | -2.005687 | -0.256151 |
| H  | 0.303296  | -0.944953 | -0.494488 |
| C  | -0.816673 | -2.637626 | -0.062632 |
| H  | -0.907294 | -3.692643 | 0.188506  |
| C  | -2.031272 | -1.835271 | -0.162283 |
| H  | -1.876580 | -0.755551 | -0.425702 |
| H  | -0.753067 | 0.579593  | 1.228097  |
| O  | -3.170734 | -2.271201 | 0.053183  |
| C  | 5.182730  | 1.579012  | 0.296854  |
| C  | 3.897878  | 1.418064  | 0.823227  |
| C  | 2.871266  | 2.325692  | 0.525780  |
| C  | 3.175637  | 3.409589  | -0.312952 |
| C  | 4.455929  | 3.576305  | -0.840474 |
| C  | 5.467396  | 2.659117  | -0.539772 |
| H  | 5.961752  | 0.862842  | 0.548952  |
| H  | 3.685963  | 0.571024  | 1.471409  |
| H  | 2.394509  | 4.126152  | -0.556300 |
| H  | 4.666299  | 4.424159  | -1.488081 |
| H  | 6.465345  | 2.788545  | -0.950593 |
| C  | -0.968271 | 1.452742  | 0.539962  |
| H  | -1.275246 | 2.275399  | 1.246730  |
| O  | -1.883328 | 1.167649  | -0.421427 |
| Cs | -4.554710 | 0.548676  | -0.047076 |
| C  | 1.471825  | 2.129879  | 1.065912  |
| H  | 1.471781  | 1.282526  | 1.765431  |
| H  | 1.173498  | 3.010810  | 1.652954  |
| C  | 0.412010  | 1.876699  | -0.022407 |
| H  | 0.760685  | 1.090620  | -0.707112 |
| H  | 0.274682  | 2.771589  | -0.644107 |

-----

N-K-3    sol\_energy=-876.173007808

-----

| Coordinates (Angstroms) |          |           |           |
|-------------------------|----------|-----------|-----------|
| ATOM                    | X        | Y         | Z         |
| C                       | 4.963926 | -0.687928 | 0.190189  |
| C                       | 3.706951 | -0.355974 | -0.316141 |
| C                       | 3.376178 | 0.974274  | -0.618381 |
| C                       | 4.344980 | 1.962354  | -0.398685 |
| C                       | 5.605212 | 1.636108  | 0.107230  |

|   |           |           |           |
|---|-----------|-----------|-----------|
| C | 5.920126  | 0.308489  | 0.404382  |
| H | 5.200123  | -1.725837 | 0.413422  |
| H | 2.964963  | -1.134631 | -0.481464 |
| H | 4.106344  | 2.998914  | -0.628563 |
| H | 6.342689  | 2.419274  | 0.266525  |
| H | 6.901345  | 0.052055  | 0.795547  |
| C | -0.484151 | 1.608920  | -0.423421 |
| H | -0.548486 | 2.517647  | -1.084142 |
| H | -0.649065 | 0.751160  | -1.129197 |
| O | -1.377949 | 1.607673  | 0.616295  |
| C | -0.216553 | -4.290543 | -0.056542 |
| C | -1.450277 | -3.716724 | -0.354138 |
| C | -1.718092 | -2.372296 | -0.029838 |
| C | -0.721175 | -1.612926 | 0.622599  |
| C | 0.507113  | -2.196058 | 0.921344  |
| C | 0.766562  | -3.528980 | 0.581168  |
| H | -0.021790 | -5.326800 | -0.319233 |
| H | -2.216373 | -4.308233 | -0.851277 |
| H | -0.914678 | -0.573329 | 0.891010  |
| H | 1.271741  | -1.606140 | 1.418832  |
| H | 1.730407  | -3.972740 | 0.817152  |
| C | -3.012963 | -1.798928 | -0.376013 |
| H | -3.751140 | -2.503423 | -0.769411 |
| C | -3.360431 | -0.493530 | -0.253034 |
| H | -2.646964 | 0.269030  | 0.112955  |
| C | -4.698839 | -0.061356 | -0.590029 |
| H | -5.385780 | -0.834086 | -0.997755 |
| O | -5.119425 | 1.093873  | -0.445145 |
| K | -3.440886 | 2.965518  | 0.645551  |
| C | 1.990673  | 1.321078  | -1.110838 |
| H | 1.625814  | 0.516332  | -1.764358 |
| H | 2.023988  | 2.231544  | -1.724459 |
| C | 0.984043  | 1.507470  | 0.040441  |
| H | 1.243318  | 2.396573  | 0.632127  |
| H | 1.059674  | 0.654784  | 0.725856  |

-----

N-N-3 sol\_energy=-1010.1426131000001

-----

| Coordinates (Angstroms) |           |           |          |
|-------------------------|-----------|-----------|----------|
| ATOM                    | X         | Y         | Z        |
| C                       | -2.625729 | -2.488318 | 1.209607 |

-----

|    |           |           |           |
|----|-----------|-----------|-----------|
| C  | -1.249840 | -2.726534 | 1.208359  |
| C  | -0.539009 | -2.870708 | 0.006989  |
| C  | -1.248430 | -2.743714 | -1.197188 |
| C  | -2.624375 | -2.505711 | -1.203456 |
| C  | -3.321310 | -2.385336 | 0.001895  |
| H  | -3.155823 | -2.389624 | 2.153547  |
| H  | -0.716261 | -2.813258 | 2.152483  |
| H  | -0.713742 | -2.843954 | -2.139348 |
| H  | -3.153418 | -2.420789 | -2.149334 |
| H  | -4.395143 | -2.216343 | 0.000070  |
| C  | 3.294641  | -1.960848 | -0.002900 |
| H  | 3.548000  | -2.602914 | -0.881779 |
| H  | 3.550489  | -2.588987 | 0.885383  |
| O  | 3.929855  | -0.752793 | -0.013643 |
| Na | 5.099387  | 0.872629  | 0.012205  |
| C  | -3.550988 | 1.252578  | -0.008148 |
| C  | -2.180190 | 1.006001  | -0.015018 |
| C  | -1.258983 | 2.071569  | -0.009001 |
| C  | -1.750143 | 3.392874  | 0.003546  |
| C  | -3.119115 | 3.635376  | 0.009997  |
| C  | -4.024062 | 2.566120  | 0.004305  |
| H  | -4.241559 | 0.414780  | -0.012415 |
| H  | -1.818385 | -0.018036 | -0.024471 |
| H  | -1.056456 | 4.228498  | 0.007766  |
| H  | -3.486481 | 4.657885  | 0.019440  |
| H  | -5.093176 | 2.761006  | 0.009514  |
| C  | 0.159966  | 1.746701  | -0.015429 |
| H  | 0.377458  | 0.679387  | -0.030364 |
| C  | 1.229471  | 2.581208  | -0.003372 |
| H  | 1.150957  | 3.665575  | 0.013635  |
| C  | 2.548295  | 1.981287  | -0.009407 |
| H  | 2.599046  | 0.873655  | -0.027332 |
| O  | 3.616192  | 2.618746  | 0.007005  |
| C  | 0.954338  | -3.108451 | 0.009295  |
| H  | 1.235524  | -3.693830 | 0.894959  |
| H  | 1.235690  | -3.709039 | -0.866087 |
| C  | 1.757204  | -1.795362 | -0.002219 |
| H  | 1.481548  | -1.194014 | 0.876716  |
| H  | 1.479669  | -1.208942 | -0.890679 |

-----

C-N-1 sol\_energy=-819.58426788

-----

| Coordinates (Angstroms) |           |           |           |
|-------------------------|-----------|-----------|-----------|
| ATOM                    | X         | Y         | Z         |
| C                       | -0.859005 | 1.888148  | -1.283273 |
| C                       | 0.391266  | 1.070571  | -1.194858 |
| H                       | 0.504750  | 0.348050  | -2.001404 |
| O                       | -0.982360 | 2.872370  | -0.225219 |
| C                       | 1.297666  | 1.128275  | -0.208172 |
| H                       | 1.169893  | 1.877761  | 0.574338  |
| C                       | 2.483617  | 0.270554  | -0.059873 |
| C                       | 3.545146  | 0.694313  | 0.758652  |
| C                       | 2.595558  | -0.980375 | -0.695442 |
| C                       | 4.689580  | -0.086485 | 0.917558  |
| H                       | 3.472943  | 1.653512  | 1.267641  |
| C                       | 3.738537  | -1.760341 | -0.537963 |
| H                       | 1.769326  | -1.354644 | -1.292885 |
| C                       | 4.793307  | -1.316742 | 0.265768  |
| H                       | 5.499208  | 0.265330  | 1.551674  |
| H                       | 3.801439  | -2.725409 | -1.033839 |
| H                       | 5.681373  | -1.930097 | 0.391094  |
| H                       | -1.728863 | 1.219319  | -1.138205 |
| H                       | -0.219042 | 3.468907  | -0.272429 |
| C                       | -3.176434 | -1.816826 | 1.496794  |
| C                       | -3.002477 | -1.173258 | 0.098466  |
| H                       | -2.295183 | -1.594062 | 2.115359  |
| H                       | -4.057700 | -1.385755 | 1.988952  |
| H                       | -3.299967 | -2.908051 | 1.460566  |
| C                       | -4.236380 | -1.522979 | -0.767752 |
| C                       | -1.735637 | -1.773291 | -0.564356 |
| H                       | -4.129153 | -1.060909 | -1.756395 |
| H                       | -4.373545 | -2.605334 | -0.900306 |
| H                       | -5.139501 | -1.110944 | -0.301737 |
| H                       | -1.769777 | -2.868578 | -0.643810 |
| H                       | -1.616519 | -1.361848 | -1.575166 |
| H                       | -0.849036 | -1.492507 | 0.018432  |
| O                       | -2.877296 | 0.196095  | 0.205954  |
| H                       | -0.941906 | 2.389442  | -2.258674 |
| Na                      | -2.159086 | 1.718065  | 1.327964  |

C-N-TS1-2 sol\_energy=-819.563755961

Coordinates (Angstroms)

| ATOM | X         | Y         | Z         |
|------|-----------|-----------|-----------|
| C    | 1.062194  | 1.723757  | 1.101052  |
| C    | -0.187446 | 1.007797  | 1.125971  |
| H    | -0.219679 | 0.185401  | 1.841640  |
| O    | 1.080878  | 2.831401  | 0.160963  |
| C    | -1.237335 | 1.157187  | 0.255321  |
| H    | -1.282600 | 2.069792  | -0.346206 |
| C    | -2.399069 | 0.274745  | 0.135186  |
| C    | -3.568187 | 0.735275  | -0.505536 |
| C    | -2.406037 | -1.051810 | 0.618226  |
| C    | -4.692714 | -0.076572 | -0.640585 |
| H    | -3.593114 | 1.754632  | -0.887566 |
| C    | -3.533500 | -1.859408 | 0.490750  |
| H    | -1.511003 | -1.457562 | 1.082509  |
| C    | -4.686721 | -1.380267 | -0.138548 |
| H    | -5.579255 | 0.312555  | -1.135696 |
| H    | -3.507459 | -2.876525 | 0.874581  |
| H    | -5.561920 | -2.015491 | -0.242916 |
| H    | 1.988335  | 0.828199  | 0.424595  |
| H    | 0.390063  | 3.469374  | 0.415164  |
| C    | 3.599064  | -1.671107 | -1.386662 |
| C    | 3.108058  | -0.980963 | -0.105721 |
| H    | 2.755346  | -1.851948 | -2.065302 |
| H    | 4.322918  | -1.030375 | -1.902460 |
| H    | 4.076770  | -2.634962 | -1.171479 |
| C    | 4.291507  | -0.721345 | 0.843806  |
| C    | 2.054073  | -1.863320 | 0.593246  |
| H    | 3.942260  | -0.209905 | 1.748377  |
| H    | 4.786916  | -1.652972 | 1.144468  |
| H    | 5.026262  | -0.074559 | 0.352644  |
| H    | 2.458745  | -2.848238 | 0.856050  |
| H    | 1.702336  | -1.384928 | 1.514217  |
| H    | 1.187585  | -2.010950 | -0.063590 |
| O    | 2.538226  | 0.257978  | -0.484184 |
| H    | 1.494948  | 1.996547  | 2.068372  |
| Na   | 0.886035  | 1.177553  | -1.476425 |

C-N-2 sol\_energy=-819.573877144

Coordinates (Angstroms)

| ATOM | X | Y | Z |
|------|---|---|---|
|------|---|---|---|



```

-----
C      -3.663410      0.022270      0.648150
C      -2.584398     -0.822792      0.724681
H      -2.385022     -1.214407      1.722670
O      -3.961194      0.675950     -0.588100
C      -1.692703     -1.153377     -0.329054
H      -2.021856     -0.969057     -1.354483
C      -0.363442     -1.670762     -0.182366
C      0.481462      -1.813499     -1.325561
C      0.245895      -1.983605      1.069974
C      1.804759     -2.237069     -1.224426
H      0.063534     -1.599939     -2.308867
C      1.566249     -2.408946      1.158268
H      -0.335465     -1.891046      1.983439
C      2.373074     -2.537396      0.018154
H      2.399794     -2.331175     -2.130787
H      1.978903     -2.640807      2.138449
H      3.404341     -2.867913      0.097297
H      0.631389      0.399889     -0.738501
H      -4.234740      0.007164     -1.241289
C      1.425013      1.533619      1.580640
C      1.594048      1.924334      0.107481
H      0.488744      1.941262      1.983714
H      1.397400      0.443928      1.681293
H      2.251122      1.921671      2.187125
C      2.907174      1.373158     -0.457945
C      1.495774      3.437118     -0.084624
H      2.988701      1.607430     -1.524629
H      3.765566      1.811912      0.062737
H      2.951601      0.284860     -0.335335
H      2.289839      3.947790      0.469866
H      1.585501      3.696639     -1.144580
H      0.533018      3.813953      0.284531
O      0.488491      1.367812     -0.656475
H      -4.407993      0.169382      1.421836
Na     -1.736338      1.376367     -0.319828
-----

```

C-N-TS2-3 sol\_energy=-819.567333171

```

-----
                          Coordinates (Angstroms)
ATOM      X           Y           Z
-----

```

|    |           |           |           |
|----|-----------|-----------|-----------|
| C  | -1.740261 | -2.842337 | 0.432206  |
| C  | -0.555986 | -2.203704 | 0.569740  |
| H  | -0.026970 | -2.425761 | 1.495737  |
| O  | -2.574227 | -2.654993 | -0.707613 |
| C  | 0.039204  | -1.248172 | -0.361049 |
| H  | -0.181546 | -1.478405 | -1.413388 |
| C  | 1.451131  | -0.846169 | -0.175472 |
| C  | 2.251695  | -0.520189 | -1.289776 |
| C  | 2.034330  | -0.677766 | 1.098153  |
| C  | 3.558544  | -0.058019 | -1.143145 |
| H  | 1.833460  | -0.635781 | -2.287982 |
| C  | 3.345227  | -0.224673 | 1.245650  |
| H  | 1.448449  | -0.888886 | 1.989710  |
| C  | 4.120765  | 0.090371  | 0.127532  |
| H  | 4.143587  | 0.181104  | -2.028452 |
| H  | 3.760106  | -0.109722 | 2.244646  |
| H  | 5.140238  | 0.447665  | 0.243854  |
| H  | -0.729559 | -0.050798 | -0.254048 |
| H  | -2.009286 | -2.661541 | -1.500886 |
| C  | -0.393532 | 2.164838  | 1.389109  |
| C  | -1.090891 | 2.127665  | 0.017503  |
| H  | -1.093349 | 1.845907  | 2.172568  |
| H  | 0.466174  | 1.487103  | 1.398151  |
| H  | -0.036970 | 3.172594  | 1.635797  |
| C  | -0.098888 | 2.516892  | -1.093040 |
| C  | -2.291368 | 3.086403  | 0.011706  |
| H  | -0.593457 | 2.459460  | -2.069600 |
| H  | 0.281342  | 3.536537  | -0.954038 |
| H  | 0.754632  | 1.830868  | -1.099594 |
| H  | -1.983799 | 4.124640  | 0.186554  |
| H  | -2.808107 | 3.036091  | -0.953947 |
| H  | -3.002860 | 2.806525  | 0.800571  |
| O  | -1.589968 | 0.824373  | -0.231836 |
| H  | -2.132865 | -3.591564 | 1.110496  |
| Na | -3.063226 | -0.602901 | 0.165886  |

-----

C-N-3    sol\_energy=-819.618170316

-----

| Coordinates (Angstroms) |           |          |           |
|-------------------------|-----------|----------|-----------|
| ATOM                    | X         | Y        | Z         |
| C                       | -0.310781 | 2.525084 | 0.666123  |
| C                       | -1.160347 | 2.703232 | -0.377948 |

|    |           |           |           |
|----|-----------|-----------|-----------|
| H  | -1.607696 | 3.681958  | -0.525906 |
| O  | 0.330389  | 1.419991  | 0.985172  |
| C  | -1.473973 | 1.611285  | -1.375574 |
| H  | -2.205798 | 1.984675  | -2.106053 |
| C  | -2.030317 | 0.323047  | -0.776734 |
| C  | -1.682551 | -0.930131 | -1.309839 |
| C  | -2.875300 | 0.348098  | 0.347000  |
| C  | -2.140362 | -2.120295 | -0.729676 |
| H  | -1.013656 | -0.973192 | -2.165483 |
| C  | -3.338633 | -0.835375 | 0.930103  |
| H  | -3.120330 | 1.312953  | 0.781875  |
| C  | -2.967240 | -2.079599 | 0.399569  |
| H  | -1.845706 | -3.075725 | -1.156496 |
| H  | -3.987402 | -0.788995 | 1.801460  |
| H  | -3.325909 | -3.000103 | 0.852415  |
| H  | -0.583909 | 1.337065  | -1.963579 |
| H  | 1.202073  | 0.463650  | -0.069996 |
| C  | 3.498527  | -1.790592 | -0.545080 |
| C  | 2.979560  | -0.425880 | -0.093135 |
| H  | 3.008968  | -2.590267 | 0.023688  |
| H  | 3.283840  | -1.945870 | -1.607725 |
| H  | 4.580378  | -1.869724 | -0.390678 |
| C  | 3.593912  | 0.705159  | -0.929981 |
| C  | 3.249065  | -0.193165 | 1.403002  |
| H  | 3.189939  | 1.672925  | -0.610782 |
| H  | 4.684318  | 0.734100  | -0.821023 |
| H  | 3.350741  | 0.563192  | -1.988259 |
| H  | 4.321712  | -0.104762 | 1.610259  |
| H  | 2.744369  | 0.722472  | 1.729760  |
| H  | 2.862226  | -1.034737 | 1.994757  |
| O  | 1.558018  | -0.444186 | -0.321766 |
| H  | -0.138836 | 3.387914  | 1.330837  |
| Na | -0.232358 | -0.666289 | 1.120609  |

-----  
C-K-1 sol\_energy=-685.612347095  
-----

| Coordinates (Angstroms) |           |           |           |
|-------------------------|-----------|-----------|-----------|
| ATOM                    | X         | Y         | Z         |
| C                       | -0.865939 | 1.564279  | -1.607616 |
| C                       | 0.367952  | 0.749726  | -1.371937 |
| H                       | 0.386622  | -0.194316 | -1.914519 |
| O                       | -0.887363 | 2.803242  | -0.864418 |

|   |           |           |           |
|---|-----------|-----------|-----------|
| C | 1.360465  | 1.060594  | -0.522867 |
| H | 1.325087  | 2.029295  | -0.021423 |
| C | 2.529058  | 0.230414  | -0.193530 |
| C | 3.656708  | 0.827892  | 0.397302  |
| C | 2.563121  | -1.157714 | -0.427207 |
| C | 4.786831  | 0.077101  | 0.719999  |
| H | 3.647885  | 1.898474  | 0.593511  |
| C | 3.691710  | -1.907920 | -0.106314 |
| H | 1.690434  | -1.654936 | -0.840456 |
| C | 4.811175  | -1.295413 | 0.465715  |
| H | 5.647920  | 0.564381  | 1.170194  |
| H | 3.693439  | -2.978811 | -0.291997 |
| H | 5.688174  | -1.884649 | 0.719286  |
| H | -1.731725 | 0.973227  | -1.230859 |
| H | -0.160634 | 3.357019  | -1.190490 |
| C | -1.536273 | -1.921220 | 0.731046  |
| C | -2.794460 | -1.350615 | 0.012429  |
| H | -0.632165 | -1.477683 | 0.293776  |
| H | -1.563391 | -1.649552 | 1.797951  |
| H | -1.448967 | -3.015286 | 0.670663  |
| C | -4.054566 | -1.946426 | 0.691745  |
| C | -2.760775 | -1.827729 | -1.464552 |
| H | -4.951891 | -1.567846 | 0.188300  |
| H | -4.080536 | -3.045757 | 0.675771  |
| H | -4.093598 | -1.615548 | 1.738669  |
| H | -2.785962 | -2.921769 | -1.568746 |
| H | -3.619518 | -1.404590 | -1.998344 |
| H | -1.848920 | -1.460460 | -1.954328 |
| O | -2.815791 | 0.020664  | 0.073152  |
| H | -1.011942 | 1.763192  | -2.680276 |
| K | -1.845006 | 1.740871  | 1.485693  |

-----

C-K-TS1-2    sol\_energy=-685.60087933

-----

| Coordinates (Angstroms) |           |           |           |
|-------------------------|-----------|-----------|-----------|
| ATOM                    | X         | Y         | Z         |
| C                       | 0.989647  | -1.301174 | -1.454056 |
| C                       | -0.257865 | -0.584363 | -1.336987 |
| H                       | -0.255541 | 0.399474  | -1.808846 |
| O                       | 0.958535  | -2.637101 | -0.896545 |
| C                       | -1.352845 | -0.957658 | -0.605579 |

|   |            |           |           |
|---|------------|-----------|-----------|
| H | - 1.396877 | -1.989694 | -0.249028 |
| C | -2.529361  | -0.145972 | -0.304300 |
| C | -3.691352  | -0.760324 | 0.211404  |
| C | -2.566744  | 1.256198  | -0.475819 |
| C | -4.831937  | -0.022694 | 0.522410  |
| H | -3.696496  | -1.840311 | 0.352146  |
| C | -3.709539  | 1.991237  | -0.172213 |
| H | -1.683466  | 1.775119  | -0.838777 |
| C | -4.853063  | 1.360863  | 0.329697  |
| H | -5.710306  | -0.531788 | 0.912590  |
| H | -3.704558  | 3.068941  | -0.318541 |
| H | -5.740705  | 1.938930  | 0.571294  |
| H | 1.942184   | -0.642393 | -0.616890 |
| H | 0.288063   | -3.151212 | -1.380784 |
| C | 2.034457   | 2.073270  | 0.149766  |
| C | 3.172402   | 1.031385  | 0.065333  |
| H | 1.263475   | 1.857775  | -0.598370 |
| H | 1.561871   | 2.036050  | 1.141054  |
| H | 2.392997   | 3.097447  | -0.013694 |
| C | 4.217879   | 1.322849  | 1.154907  |
| C | 3.838183   | 1.101573  | -1.324032 |
| H | 5.021767   | 0.580234  | 1.106416  |
| H | 4.656268   | 2.323380  | 1.047278  |
| H | 3.753222   | 1.256486  | 2.147364  |
| H | 4.287565   | 2.084345  | -1.515083 |
| H | 4.619856   | 0.337562  | -1.395883 |
| H | 3.101144   | 0.904121  | -2.111215 |
| O | 2.668425   | -0.262813 | 0.293875  |
| H | 1.444165   | -1.285969 | -2.452593 |
| K | 0.846343   | -1.432122 | 1.593670  |

-----

C-K-2 sol\_energy=-685.609524042

-----

| Coordinates (Angstroms) |          |           |           |
|-------------------------|----------|-----------|-----------|
| ATOM                    | X        | Y         | Z         |
| C                       | 3.822326 | -0.045776 | -0.665758 |
| C                       | 2.714744 | -0.845222 | -0.734659 |
| H                       | 2.516878 | -1.267309 | -1.721928 |
| O                       | 4.154052 | 0.629161  | 0.542854  |
| C                       | 1.805562 | -1.145705 | 0.317507  |
| H                       | 2.146564 | -0.998284 | 1.344267  |

|   |           |           |           |
|---|-----------|-----------|-----------|
| C | 0.498859  | -1.692302 | 0.154999  |
| C | -0.268000 | -2.117476 | 1.285729  |
| C | -0.173579 | -1.795528 | -1.106427 |
| C | -1.555630 | -2.617657 | 1.164721  |
| H | 0.192037  | -2.058526 | 2.271277  |
| C | -1.463205 | -2.319523 | -1.215572 |
| H | 0.344571  | -1.488383 | -2.012267 |
| C | -2.181904 | -2.730223 | -0.089338 |
| H | -2.085922 | -2.934145 | 2.061413  |
| H | -1.917687 | -2.390328 | -2.202474 |
| H | -3.186920 | -3.131202 | -0.179874 |
| H | -0.867361 | 0.251936  | -0.736048 |
| H | 4.386496  | -0.040093 | 1.209811  |
| C | -3.296510 | 0.928083  | -0.754005 |
| C | -2.132965 | 1.609593  | -0.023302 |
| H | -3.272094 | 1.181193  | -1.819374 |
| H | -3.224060 | -0.160310 | -0.651801 |
| H | -4.259106 | 1.249141  | -0.339942 |
| C | -2.101290 | 1.194338  | 1.454124  |
| C | -2.212806 | 3.130504  | -0.168222 |
| H | -1.289188 | 1.711693  | 1.983096  |
| H | -3.041661 | 1.446715  | 1.957539  |
| H | -1.935038 | 0.115981  | 1.542027  |
| H | -3.131349 | 3.516039  | 0.286198  |
| H | -1.363612 | 3.614831  | 0.332934  |
| H | -2.197751 | 3.415802  | -1.225389 |
| O | -0.887078 | 1.231358  | -0.650781 |
| H | 4.568450  | 0.050312  | -1.448417 |
| K | 1.618282  | 1.774324  | 0.131242  |

-----

C-K-TS2-3    sol\_energy=-685.602517969

-----

| Coordinates (Angstroms) |           |           |           |
|-------------------------|-----------|-----------|-----------|
| ATOM                    | X         | Y         | Z         |
| C                       | -1.626117 | -2.859078 | 0.258771  |
| C                       | -0.463700 | -2.217408 | 0.497365  |
| H                       | 0.047233  | -2.513077 | 1.412768  |
| O                       | -2.419677 | -2.609408 | -0.887832 |
| C                       | 0.149316  | -1.169895 | -0.327609 |
| H                       | -0.101291 | -1.271914 | -1.394640 |
| C                       | 1.593407  | -0.895295 | -0.143597 |

|   |           |           |           |
|---|-----------|-----------|-----------|
| C | 2.424524  | -0.616633 | -1.247661 |
| C | 2.182210  | -0.802370 | 1.135478  |
| C | 3.765355  | -0.267917 | -1.087177 |
| H | 2.004401  | -0.681230 | -2.249780 |
| C | 3.525399  | -0.466451 | 1.297212  |
| H | 1.570216  | -0.974267 | 2.018060  |
| C | 4.331122  | -0.194705 | 0.187746  |
| H | 4.373289  | -0.060900 | -1.965288 |
| H | 3.943481  | -0.405062 | 2.299756  |
| H | 5.376477  | 0.073065  | 0.315599  |
| H | -0.508883 | 0.034086  | -0.026050 |
| H | -1.809275 | -2.482215 | -1.635546 |
| C | 0.424088  | 2.528110  | 1.035700  |
| C | -0.650069 | 2.256621  | -0.035590 |
| H | -0.031309 | 2.494742  | 2.033037  |
| H | 1.202381  | 1.759823  | 0.991923  |
| H | 0.898070  | 3.509262  | 0.902471  |
| C | -0.010655 | 2.294874  | -1.438833 |
| C | -1.753141 | 3.328054  | 0.055165  |
| H | -0.763447 | 2.042989  | -2.196905 |
| H | 0.400444  | 3.284789  | -1.674290 |
| H | 0.802537  | 1.564925  | -1.506077 |
| H | -1.359532 | 4.341616  | -0.092908 |
| H | -2.519650 | 3.146172  | -0.710768 |
| H | -2.232507 | 3.288386  | 1.042025  |
| O | -1.255944 | 1.006584  | 0.191054  |
| H | -2.030012 | -3.660139 | 0.869566  |
| K | -3.326741 | -0.325048 | 0.316813  |

-----

C-K-3 sol\_energy=-685.654406072

-----

| Coordinates (Angstroms) |           |           |           |
|-------------------------|-----------|-----------|-----------|
| ATOM                    | X         | Y         | Z         |
| C                       | 0.056889  | -2.442487 | -0.911166 |
| C                       | -0.590724 | -2.747536 | 0.244459  |
| H                       | -0.913586 | -3.771838 | 0.408584  |
| O                       | 0.526300  | -1.269066 | -1.268948 |
| C                       | -0.860244 | -1.720208 | 1.319281  |
| H                       | -1.316195 | -2.214276 | 2.189505  |
| C                       | -1.776799 | -0.567089 | 0.916005  |
| C                       | -2.826249 | -0.752463 | 0.001004  |

|   |           |           |           |
|---|-----------|-----------|-----------|
| C | -1.590955 | 0.717860  | 1.453263  |
| C | -3.660654 | 0.307458  | -0.367130 |
| H | -2.954644 | -1.738143 | -0.438145 |
| C | -2.421783 | 1.784094  | 1.089460  |
| H | -0.762774 | 0.886835  | 2.136042  |
| C | -3.462169 | 1.585228  | 0.173652  |
| H | -4.473334 | 0.136065  | -1.069903 |
| H | -2.258190 | 2.768176  | 1.523585  |
| H | -4.118396 | 2.407446  | -0.101662 |
| H | 0.073998  | -1.272937 | 1.688617  |
| H | 1.114389  | -0.260397 | -0.132053 |
| C | 3.420138  | 1.707828  | 1.035452  |
| C | 2.891158  | 0.462094  | 0.323359  |
| H | 3.116771  | 2.612926  | 0.495039  |
| H | 3.011885  | 1.763543  | 2.050385  |
| H | 4.514166  | 1.693078  | 1.097765  |
| C | 3.263813  | -0.813286 | 1.095955  |
| C | 3.416736  | 0.382144  | -1.121091 |
| H | 2.829763  | -1.690580 | 0.603536  |
| H | 4.350918  | -0.946520 | 1.152381  |
| H | 2.864683  | -0.761338 | 2.114948  |
| H | 4.503878  | 0.242806  | -1.152034 |
| H | 2.933871  | -0.455235 | -1.636438 |
| H | 3.182790  | 1.311211  | -1.660397 |
| O | 1.463677  | 0.587036  | 0.298532  |
| H | 0.206218  | -3.262264 | -1.635963 |
| K | -0.367419 | 1.083466  | -1.651868 |

-----

C-C-1 sol\_energy=-520.248979801

-----

| ATOM | Coordinates (Angstroms) |           |           |
|------|-------------------------|-----------|-----------|
|      | X                       | Y         | Z         |
| C    | 0.892978                | 2.305363  | -0.263439 |
| C    | -0.473115               | 1.833102  | 0.085411  |
| H    | -0.870973               | 2.258564  | 1.006930  |
| O    | 1.384696                | 1.768342  | -1.509660 |
| C    | -1.179381               | 0.900590  | -0.587009 |
| H    | -0.764939               | 0.532616  | -1.527228 |
| C    | -2.476764               | 0.323956  | -0.214318 |
| C    | -3.206398               | -0.410089 | -1.169691 |
| C    | -3.032826               | 0.448376  | 1.075225  |
| C    | -4.441709               | -0.978778 | -0.862223 |



|    |           |           |           |
|----|-----------|-----------|-----------|
| H  | -2.798031 | -0.522346 | -2.172598 |
| C  | -4.267624 | -0.117329 | 1.382636  |
| H  | -2.483865 | 0.981181  | 1.846594  |
| C  | -4.982302 | -0.833833 | 0.417078  |
| H  | -4.983491 | -1.534428 | -1.623789 |
| H  | -4.672038 | -0.006250 | 2.385765  |
| H  | -5.943700 | -1.277116 | 0.661815  |
| H  | 1.631937  | 1.938011  | 0.551722  |
| H  | 0.790802  | 2.074430  | -2.214487 |
| O  | 2.662614  | 1.153213  | 1.615007  |
| H  | 3.377683  | 1.805719  | 1.683032  |
| Cs | 2.225565  | -0.979238 | -0.006398 |
| H  | 0.934893  | 3.407108  | -0.270644 |

-----

C-C-TS1-2 sol\_energy=-520.244455612

-----

| Coordinates (Angstroms) |           |           |           |
|-------------------------|-----------|-----------|-----------|
| ATOM                    | X         | Y         | Z         |
| C                       | 1.273186  | 2.328077  | -0.146124 |
| C                       | -0.108242 | 1.957229  | 0.130400  |
| H                       | -0.493826 | 2.345836  | 1.074078  |
| O                       | 1.762331  | 1.871785  | -1.424417 |
| C                       | -0.870482 | 1.094185  | -0.598124 |
| H                       | -0.484071 | 0.783586  | -1.570909 |
| C                       | -2.163886 | 0.519987  | -0.237188 |
| C                       | -2.871889 | -0.250339 | -1.185837 |
| C                       | -2.747244 | 0.654393  | 1.043110  |
| C                       | -4.095666 | -0.843726 | -0.881707 |
| H                       | -2.451791 | -0.369480 | -2.183681 |
| C                       | -3.972207 | 0.065706  | 1.344657  |
| H                       | -2.228798 | 1.221801  | 1.811174  |
| C                       | -4.658579 | -0.689882 | 0.387640  |
| H                       | -4.613768 | -1.425675 | -1.640671 |
| H                       | -4.393746 | 0.192182  | 2.339308  |
| H                       | -5.612454 | -1.150752 | 0.628980  |
| H                       | 2.031093  | 1.720685  | 0.731357  |
| H                       | 1.205907  | 2.273609  | -2.114211 |
| O                       | 2.806049  | 0.946937  | 1.513116  |
| H                       | 3.615048  | 1.475168  | 1.592735  |
| Cs                      | 1.758235  | -1.127852 | -0.009505 |
| H                       | 1.466514  | 3.401380  | 0.004049  |

-----  
C-C-2 sol\_energy=-520.249233277  
-----

| Coordinates (Angstroms) |           |           |           |
|-------------------------|-----------|-----------|-----------|
| ATOM                    | X         | Y         | Z         |
| C                       | 1.764085  | 2.313554  | -0.025714 |
| C                       | 0.404785  | 2.122616  | 0.208767  |
| H                       | 0.046512  | 2.508222  | 1.165047  |
| O                       | 2.317606  | 1.834772  | -1.247294 |
| C                       | -0.488020 | 1.428602  | -0.614708 |
| H                       | -0.158274 | 1.215210  | -1.633569 |
| C                       | -1.759489 | 0.866969  | -0.242614 |
| C                       | -2.550320 | 0.181010  | -1.209352 |
| C                       | -2.268162 | 0.860984  | 1.088502  |
| C                       | -3.746584 | -0.446405 | -0.877381 |
| H                       | -2.209676 | 0.171218  | -2.244940 |
| C                       | -3.470438 | 0.238987  | 1.409384  |
| H                       | -1.704110 | 1.355427  | 1.875842  |
| C                       | -4.226847 | -0.428755 | 0.437770  |
| H                       | -4.317554 | -0.949312 | -1.656260 |
| H                       | -3.821788 | 0.269377  | 2.439497  |
| H                       | -5.162523 | -0.915958 | 0.697080  |
| H                       | 2.544105  | 1.058805  | 1.219122  |
| H                       | 1.901631  | 2.327803  | -1.978962 |
| O                       | 2.993616  | 0.266857  | 1.652277  |
| H                       | 3.932080  | 0.507305  | 1.638268  |
| Cs                      | 1.131088  | -1.279058 | -0.113085 |
| H                       | 2.295898  | 3.161687  | 0.410729  |

-----  
C-C-TS2-3 sol\_energy=-520.239971429  
-----

| Coordinates (Angstroms) |           |          |           |
|-------------------------|-----------|----------|-----------|
| ATOM                    | X         | Y        | Z         |
| C                       | -0.641853 | 2.419095 | -0.191232 |
| C                       | 0.394466  | 1.629290 | -0.530919 |
| H                       | 0.845670  | 1.833930 | -1.501643 |
| O                       | -1.345847 | 2.291402 | 1.022899  |
| C                       | 0.904619  | 0.472150 | 0.219276  |

|    |           |           |           |
|----|-----------|-----------|-----------|
| C  | 2.362136  | 0.152246  | 0.131238  |
| C  | 3.331282  | 1.018802  | -0.403972 |
| C  | 2.800720  | -1.110060 | 0.584291  |
| C  | 4.674356  | 0.642234  | -0.489228 |
| H  | 3.034220  | 2.009214  | -0.739836 |
| C  | 4.141242  | -1.480546 | 0.515190  |
| H  | 2.054373  | -1.806200 | 0.960887  |
| C  | 5.090839  | -0.606728 | -0.026349 |
| H  | 5.400292  | 1.336793  | -0.907347 |
| H  | 4.447859  | -2.461304 | 0.873299  |
| H  | -0.687015 | 2.052260  | 1.698893  |
| H  | 0.301192  | -0.671271 | -0.169712 |
| O  | -0.280955 | -1.816534 | -0.349016 |
| H  | 0.397686  | -2.319362 | -0.822255 |
| H  | 0.587849  | 0.479389  | 1.275957  |
| H  | 6.136900  | -0.896693 | -0.086501 |
| Cs | -2.669424 | -0.461844 | -0.073107 |
| H  | -1.033120 | 3.226823  | -0.801702 |

-----

C-C-3 sol\_energy=-520.296629789

-----

| Coordinates (Angstroms) |           |           |           |
|-------------------------|-----------|-----------|-----------|
| ATOM                    | X         | Y         | Z         |
| C                       | 4.747158  | -1.141730 | -1.058927 |
| C                       | 3.476639  | -1.393454 | -0.541232 |
| C                       | 2.813260  | -0.440188 | 0.251022  |
| C                       | 3.460755  | 0.785309  | 0.482445  |
| C                       | 4.732126  | 1.039729  | -0.032038 |
| C                       | 5.384743  | 0.076386  | -0.805516 |
| H                       | 5.237588  | -1.894894 | -1.671794 |
| H                       | 2.982177  | -2.332642 | -0.771740 |
| H                       | 2.938859  | 1.525761  | 1.080200  |
| H                       | 5.217190  | 1.992236  | 0.172035  |
| H                       | 6.373751  | 0.273661  | -1.212008 |
| C                       | 1.434509  | -0.645013 | 0.816930  |
| C                       | 0.938411  | -1.908510 | 0.994335  |
| H                       | 1.562585  | -2.774050 | 0.800964  |
| O                       | 0.784022  | 0.457303  | 1.102671  |
| C                       | -0.464699 | -2.137985 | 1.492149  |
| C                       | -1.572365 | -1.870155 | 0.472389  |
| C                       | -1.376451 | -2.114768 | -0.896170 |

|    |           |           |           |
|----|-----------|-----------|-----------|
| C  | -2.820137 | -1.371394 | 0.880550  |
| C  | -2.391283 | -1.873791 | -1.827248 |
| H  | -0.403345 | -2.473874 | -1.220796 |
| C  | -3.840090 | -1.127903 | -0.045494 |
| H  | -2.971070 | -1.130315 | 1.928671  |
| C  | -3.631156 | -1.377224 | -1.406663 |
| H  | -2.218119 | -2.081911 | -2.881201 |
| H  | -4.798420 | -0.742420 | 0.296802  |
| H  | -0.478268 | 0.670160  | 2.130749  |
| H  | -0.677086 | -1.512237 | 2.369383  |
| O  | -1.337388 | 1.023578  | 2.526330  |
| H  | -1.148236 | 1.123463  | 3.469563  |
| H  | -0.571714 | -3.179857 | 1.828175  |
| H  | -4.426013 | -1.199095 | -2.127385 |
| Cs | -1.228027 | 1.725329  | -0.470597 |

-----

P-C-TS1-2    sol\_energy=-443.756732779

-----

| Coordinates (Angstroms) |           |           |           |
|-------------------------|-----------|-----------|-----------|
| ATOM                    | X         | Y         | Z         |
| C                       | -4.079271 | -0.851202 | 0.872826  |
| C                       | -2.884065 | -0.259830 | 1.266111  |
| C                       | -2.081336 | 0.485086  | 0.363017  |
| C                       | -2.589930 | 0.628675  | -0.954540 |
| C                       | -3.781744 | 0.024239  | -1.346410 |
| C                       | -4.540198 | -0.728453 | -0.443815 |
| H                       | -4.660983 | -1.413889 | 1.600728  |
| H                       | -2.541619 | -0.374828 | 2.293908  |
| H                       | -2.050958 | 1.244950  | -1.669973 |
| H                       | -4.134631 | 0.160620  | -2.367195 |
| H                       | -5.474757 | -1.189530 | -0.751349 |
| C                       | -0.802624 | 1.008980  | 0.786624  |
| H                       | -0.631847 | 1.082573  | 1.862254  |
| C                       | 0.127636  | 1.638140  | -0.062611 |
| H                       | 0.116158  | 1.400131  | -1.131420 |
| C                       | 1.379137  | 2.277915  | 0.355878  |
| H                       | 1.331541  | 2.715464  | 1.376266  |
| H                       | 0.249669  | 3.040705  | -0.198589 |
| O                       | 2.483416  | 2.164582  | -0.247841 |
| Cs                      | 2.062627  | -0.896803 | -0.073716 |

-----

P-K-TS1-2 sol\_energy=-451.90505684199996

---

| Coordinates (Angstroms) |           |           |           |
|-------------------------|-----------|-----------|-----------|
| ATOM                    | X         | Y         | Z         |
| C                       | 3.434504  | 0.721898  | 0.745761  |
| C                       | 2.123598  | 0.528579  | 1.167375  |
| C                       | 1.192629  | -0.214699 | 0.398984  |
| C                       | 1.680172  | -0.784716 | -0.803845 |
| C                       | 2.990832  | -0.578019 | -1.228524 |
| C                       | 3.883177  | 0.180131  | -0.464617 |
| H                       | 4.115658  | 1.300134  | 1.366995  |
| H                       | 1.792430  | 0.965135  | 2.108624  |
| H                       | 1.027046  | -1.419173 | -1.398012 |
| H                       | 3.325432  | -1.032725 | -2.158996 |
| H                       | 4.907438  | 0.330806  | -0.794339 |
| C                       | -0.184958 | -0.329298 | 0.834809  |
| H                       | -0.380088 | -0.144539 | 1.892802  |
| C                       | -1.209176 | -0.952971 | 0.090305  |
| H                       | -1.146883 | -0.945270 | -1.004002 |
| C                       | -2.564531 | -1.219180 | 0.578397  |
| H                       | -2.617458 | -1.474610 | 1.655523  |
| H                       | -1.598920 | -2.290428 | 0.219491  |
| O                       | -3.616032 | -0.963218 | -0.078483 |
| K                       | -2.556520 | 1.489793  | -0.482742 |

---

P-N-TS1-2 sol\_energy=-585.861628687

---

| Coordinates (Angstroms) |          |           |           |
|-------------------------|----------|-----------|-----------|
| ATOM                    | X        | Y         | Z         |
| C                       | 3.209291 | 1.006335  | 0.120415  |
| C                       | 1.868638 | 1.208805  | 0.430797  |
| C                       | 0.914228 | 0.170547  | 0.313550  |
| C                       | 1.394338 | -1.094136 | -0.101208 |
| C                       | 2.736011 | -1.290450 | -0.422506 |
| C                       | 3.657071 | -0.244460 | -0.319286 |
| H                       | 3.912681 | 1.829813  | 0.222875  |
| H                       | 1.535952 | 2.190534  | 0.763755  |
| H                       | 0.711417 | -1.938833 | -0.145726 |

|    |           |           |           |
|----|-----------|-----------|-----------|
| H  | 3.069070  | -2.276978 | -0.737822 |
| H  | 4.704310  | -0.403483 | -0.561011 |
| C  | -0.488656 | 0.437397  | 0.585759  |
| H  | -0.704234 | 1.293417  | 1.227774  |
| C  | -1.528873 | -0.507429 | 0.411712  |
| H  | -1.449538 | -1.230007 | -0.410172 |
| C  | -2.903809 | -0.287978 | 0.859519  |
| H  | -3.013668 | 0.183282  | 1.851511  |
| H  | -2.016365 | -1.408146 | 1.347509  |
| O  | -3.898721 | -0.391854 | 0.076630  |
| Na | -2.609936 | 0.773041  | -1.404023 |

-----

P-C-2    sol\_energy=-443.803518369

-----

| Coordinates (Angstroms) |           |           |           |
|-------------------------|-----------|-----------|-----------|
| ATOM                    | X         | Y         | Z         |
| C                       | 0.026595  | 2.791481  | 0.785408  |
| C                       | 0.918707  | 1.816990  | 1.209153  |
| C                       | 1.521928  | 0.872098  | 0.302776  |
| C                       | 1.135397  | 1.030466  | -1.076647 |
| C                       | 0.246052  | 2.022691  | -1.482606 |
| C                       | -0.344884 | 2.910062  | -0.569042 |
| H                       | -0.385018 | 3.484236  | 1.519023  |
| H                       | 1.191737  | 1.763524  | 2.262603  |
| H                       | 1.543611  | 0.353502  | -1.819491 |
| H                       | 0.006756  | 2.105971  | -2.542954 |
| H                       | -1.022566 | 3.691960  | -0.899932 |
| C                       | 2.383910  | -0.138124 | 0.768733  |
| H                       | 2.632206  | -0.157153 | 1.826868  |
| C                       | 2.979633  | -1.216208 | -0.099314 |
| H                       | 3.175111  | -0.925504 | -1.137449 |
| C                       | 1.782336  | -2.104317 | 0.028710  |
| H                       | 1.719832  | -2.632086 | 1.006866  |
| H                       | 3.886151  | -1.651489 | 0.337074  |
| O                       | 0.839625  | -2.186357 | -0.786039 |
| Cs                      | -1.515688 | -0.662781 | 0.118776  |

-----

P-K-2    sol\_energy=-451.952403323

| Coordinates (Angstroms) |           |           |           |
|-------------------------|-----------|-----------|-----------|
| ATOM                    | X         | Y         | Z         |
| C                       | 2.751037  | -0.247914 | 0.613814  |
| C                       | 1.566744  | -0.695243 | 1.176498  |
| C                       | 0.363529  | -0.888401 | 0.400492  |
| C                       | 0.543155  | -0.714169 | -1.021221 |
| C                       | 1.746420  | -0.274103 | -1.568783 |
| C                       | 2.862768  | 0.011157  | -0.768702 |
| H                       | 3.618488  | -0.105051 | 1.257643  |
| H                       | 1.517860  | -0.879727 | 2.249728  |
| H                       | -0.293871 | -0.907877 | -1.689022 |
| H                       | 1.814656  | -0.152112 | -2.649695 |
| H                       | 3.798680  | 0.347339  | -1.204459 |
| C                       | -0.888950 | -1.087861 | 1.012870  |
| H                       | -0.891189 | -1.378039 | 2.061665  |
| C                       | -2.115693 | -1.441338 | 0.230685  |
| H                       | -1.959966 | -2.229168 | -0.543545 |
| C                       | -2.830656 | -0.350337 | -0.539608 |
| H                       | -3.718827 | -0.700207 | -1.115747 |
| H                       | -2.894720 | -1.879180 | 0.878315  |
| O                       | -2.520815 | 0.830503  | -0.609459 |
| K                       | -0.253406 | 1.861540  | 0.442869  |

P-N-2 sol\_energy=-585.914724393

| Coordinates (Angstroms) |           |           |           |
|-------------------------|-----------|-----------|-----------|
| ATOM                    | X         | Y         | Z         |
| C                       | -2.852549 | 0.598299  | 0.229520  |
| C                       | -1.640748 | 1.265439  | 0.151081  |
| C                       | -0.436938 | 0.619463  | -0.284024 |
| C                       | -0.589360 | -0.754539 | -0.660610 |
| C                       | -1.820828 | -1.412098 | -0.580552 |
| C                       | -2.965445 | -0.758260 | -0.125068 |
| H                       | -3.734304 | 1.142275  | 0.564111  |
| H                       | -1.586260 | 2.317006  | 0.429783  |
| H                       | 0.268886  | -1.305924 | -1.039831 |
| H                       | -1.878898 | -2.454856 | -0.888612 |
| H                       | -3.918499 | -1.274745 | -0.061124 |
| C                       | 0.835225  | 1.290745  | -0.224277 |
| H                       | 0.778255  | 2.376856  | -0.177340 |

|    |          |           |           |
|----|----------|-----------|-----------|
| C  | 1.997262 | 0.772127  | -1.030975 |
| H  | 1.729585 | 0.441800  | -2.062111 |
| C  | 2.790288 | -0.397624 | -0.496831 |
| H  | 3.611285 | -0.753607 | -1.155219 |
| H  | 2.749308 | 1.561265  | -1.201405 |
| O  | 2.596090 | -0.991659 | 0.558911  |
| Na | 0.846406 | -0.132556 | 1.750079  |

-----
